# Supplementary material for: A Customized Human Mitochondrial DNA Database (hMITO DB v1.0) for Rapid Sequence Analysis, Haplotyping and Geo-Mapping to Advance Translational Mitogenomics
Source: Preprints.org preprint supplement (doi:10.20944/preprints202307.1891.v1), 2023-07-27
Supplement: Supplementary file 1 [file supplementary]

**Supplementary Table S2** BLAST results and statistics<sup>a</sup> for human mtDNA haplotyping and geo-mapping

| Query     | Number of HSPs | Lowest E-value | Accession (E-value) | Description (E-value)                                            |
|-----------|----------------|----------------|---------------------|------------------------------------------------------------------|
| A01_HeLa  | 500            | 0              | JQ705753.1          | JQ705753.1; L3b1a; Africa_E; 38; A73G; A263G; C315CC             |
| A03_Caski | 500            | 0              | KC911472_HV         | KC911472_HV; HV; Asia_W; 11; A263G; C315CC; A750G                |
| A04_SiHa  | 500            | 0              | JQ703841.1          | JQ703841.1; X2b+226; Asia_W_America_N; 32; A73G; T195C; A200G    |
| A05_C33-A | 500            | 0              | JQ706015.1          | JQ706015.1; U5a1b1a1; Asia_W_Europe_C; 29; A73G; A263G; C315CC   |
| A06_Doc2C | 500            | 0              | JQ702663.1          | JQ702663.1; U2e1b1; Asia_S_W_Europe; 38; A73G; T152C; T217C      |
| A07_151v  | 500            | 0              | JQ706012.1          | JQ706012.1; H3i1; Asia_W_Europe; 12; T152C; A263G; C315CC        |
| A08_152v  | 500            | 0              | JQ705889.1          | JQ705889.1; I1a1; Asia_W_SW; 42; A73G; T199C; G203A              |
| A09_153v  | 500            | 0              | JQ702841.1          | JQ702841.1; H49a; Asia_W_Europe; 13; A263G; C309CCCT; T310C      |
| A10_154v  | 500            | 0              | JQ705798.1          | JQ705798.1; V7; Europe_S; 18; T72C; A93G; T152C                  |
| A11_155v  | 500            | 0              | JQ701820.1          | JQ701820.1; C1b2; Asia_NE_America_N_S; 43; A73G; A249d; AA290d   |
| A12_156v  | 500            | 0              | JQ706012.1          | JQ706012.1; H3i1; Asia_W_Europe; 12; T152C; A263G; C315CC        |
| B01_500v  | 500            | 0              | JQ706056.1          | JQ706056.1; K1a31; Asia_W; 30; A73G; C150T; A263G                |
| B02_503v  | 500            | 0              | JQ706012.1          | JQ706012.1; H3i1; Asia_W_Europe; 12; T152C; A263G; C315CC        |
| B03_504v  | 500            | 0              | JQ704786.1          | JQ704786.1; T2j; Asia_W; 39; A73G; A249d; A263G                  |
| B04_505v  | 250            | 0              | JQ705434.1          | JQ705434.1; A2j; Asia_NE_America_N; 33; C64T; A73G; T146C        |
| B05_507v  | 250            | 0              | JQ706012.1          | JQ706012.1; H3i1; Asia_W_Europe; 12; T152C; A263G; C315CC        |
| B06_508v  | 500            | 0              | JQ704350.1          | JQ704350.1; A2+(64); Asia_NE_America_N; 35; C64T; A73G; T146C    |
| B07_509v  | 500            | 0              | JQ703481.1          | JQ703481.1; L0a1a2; Africa_S_SE; 83; C64T; A93G; G185A           |
| B08_511v  | 500            | 0              | JQ703650.1          | JQ703650.1; H13a1a1a; Asia_W_Europe; 19; T152C; A263G; C309CCCT  |
| B09_512v  | 500            | 0              | JQ705099.1          | JQ705099.1; V7a; Europe_S; 21; T72C; A93G; T195C                 |
| B10_513v  | 500            | 0              | JQ705521.1          | JQ705521.1; L3e1f2; Africa_E; 37; A73G; C150T; A189G             |
| B11_515v  | 500            | 0              | JQ704225.1          | JQ704225.1; H5a1; Asia_W_Europe; 16; T195C; A240G; A263G         |
| B12_516v  | 500            | 0              | JQ704767.1          | JQ704767.1; V+@72; Europe_S; 14; A263G; C309CCCT; T310C          |
| C01_519v  | 500            | 0              | JQ702074.1          | JQ702074.1; F1a3a; Asia_SE_E; 37; A73G; A249d; A263G             |
| C02_520v  | 750            | 0              | JQ703138.1          | JQ703138.1; L3e2b1a; Africa_E; 33; A73G; C150T; T195C            |
| C03_521v  | 749            | 0              | JQ705902.1          | JQ705902.1; L3e1a3a; Africa_E; 34; A73G; C150T; A200G            |
| C04_523v  | 250            | 3.2383E-180    | JQ704931.1          | JQ704931.1; L3e3b1; Africa_E; 41; A73G; C150T; T195C             |
| C05_524v  | 250            | 8.8262E-142    | JQ706012.1          | JQ706012.1; H3i1; Asia_W_Europe; 12; T152C; A263G; C315CC        |
| C06_525v  | 500            | 0              | JQ705272.1          | JQ705272.1; U5a1h; Asia_W_Europe_C; 37; A73G; C150T; G207A       |
| C07_528v  | 500            | 0              | JQ705362.1          | JQ705362.1; H1av; Asia_W_Europe; 14; A263G; C309CCCT; T310C      |
| C08_529v  | 500            | 0              | JQ705975.1          | JQ705975.1; H66a; Asia_W_Europe; 11; A263G; C315CC; A750G        |
| C09_532v  | 495            | 0              | JQ705585.1          | JQ705585.1; C1b4; Asia_NE_America_N_S; 47; A73G; G143A; T152C    |
| C10_533v  | 500            | 0              | JQ705150.1          | JQ705150.1; L2a1f; Africa_W_C; 54; A73G; T146C; T152C            |
| C11_534v  | 495            | 1.7504E-177    | JQ705378.1          | JQ705378.1; I1a1a3; Asia_W_SW; 49; A73G; A189G; T199C            |
| C12_536v  | 996            | 0              | JQ705455.1          | JQ705455.1; L2a1e1; Africa_W_C; 56; A73G; T146C; T152C           |
| D01_537v  | 500            | 0              | KC911472_HV         | KC911472_HV; HV; Asia_W; 11; A263G; C315CC; A750G                |
| D02_539v  | 500            | 1.679E-158     | KC911472_HV         | KC911472_HV; HV; Asia_W; 11; A263G; C315CC; A750G                |
| D03_542v  | 500            | 0              | JQ706018.1          | JQ706018.1; NA; NA; 2; C315CC; T16311C;                          |
| D04_543v  | 500            | 0              | JQ703786.1          | JQ703786.1; J1c3; Asia_W; 27; A73G; A263G; C295T                 |
| D05_544v  | 500            | 0              | JQ705489.1          | JQ705489.1; J1c+16261; Asia_W; 29; A73G; G185A; A263G            |
| D06_546v  | 500            | 0              | JQ705886.1          | JQ705886.1; U5a1a2b1; Asia_W_Europe_C; 33; A73G; A263G; C309CCCT |
| D07_548v  | 500            | 0              | JQ702675.1          | JQ702675.1; K1a11a; Asia_W; 39; A16T; A73G; C150T                |
| D08_549v  | 500            | 0              | JQ705964.1          | JQ705964.1; J1b1a1c; Asia_W; 39; T10C; A73G; T146C               |
| D09_550v  | 500            | 0              | NC_012920_rCRS      | NC_012920_rCRS; H2a2a1; Asia_W_Europe; 0; REF; REF; REF          |
| D10_551v  | 500            | 0              | JQ705928.1          | JQ705928.1; H11a; Asia_W_Europe; 16; T195C; A263G; C309CCCT      |
| D11_553v  | 500            | 0              | JQ706065.1          | JQ706065.1; K1a12a1a; Asia_W; 37; A73G; T195C; A263G             |
| D12_554v  | 1000           | 0              | JQ704761.1          | JQ704761.1; K1a4e; Asia_W; 35; A73G; A263G; C309CCCT             |

**Supplementary Table S2** BLAST results and statistics<sup>a</sup> for human mtDNA haplotyping and geo-mapping

| Query     | Greatest identity % | Accession (identity %) | Description (identity %)                                        |
|-----------|---------------------|------------------------|-----------------------------------------------------------------|
| A01_HeLa  | 99.82758621         | JQ705753.1             | JQ705753.1; L3b1a; Africa_E; 38; A73G; A263G; C315CC            |
| A03_Caski | 100                 | KC911472_HV            | KC911472_HV; HV; Asia_W; 11; A263G; C315CC; A750G               |
| A04_SiHa  | 99.82758621         | JQ703841.1             | JQ703841.1; X2b+226; Asia_W_America_N; 32; A73G; T195C; A200G   |
| A05_C33-A | 99.82425308         | JQ706015.1             | JQ706015.1; U5a1b1a1; Asia_W_Europe_C; 29; A73G; A263G; C315CC  |
| A06_Doc2C | 100                 | JQ702663.1             | JQ702663.1; U2e1b1; Asia_S_W_Europe; 38; A73G; T152C; T217C     |
| A07_151v  | 100                 | JQ706012.1             | JQ706012.1; H3i1; Asia_W_Europe; 12; T152C; A263G; C315CC       |
| A08_152v  | 100                 | JQ705889.1             | JQ705889.1; I1a1; Asia_W_SW; 42; A73G; T199C; G203A             |
| A09_153v  | 100                 | EU007853_Y             | EU007853_Y; Y1a+16189; Asia_NE; 24; A73G; T146C; A263G          |
| A10_154v  | 100                 | JQ705798.1             | JQ705798.1; V7; Europe_S; 18; T72C; A93G; T152C                 |
| A11_155v  | 100                 | JQ701820.1             | JQ701820.1; C1b2; Asia_NE_America_N_S; 43; A73G; A249d; AA290d  |
| A12_156v  | 100                 | JQ706012.1             | JQ706012.1; H3i1; Asia_W_Europe; 12; T152C; A263G; C315CC       |
| B01_500v  | 100                 | JQ706056.1             | JQ706056.1; K1a31; Asia_W; 30; A73G; C150T; A263G               |
| B02_503v  | 100                 | JQ706012.1             | JQ706012.1; H3i1; Asia_W_Europe; 12; T152C; A263G; C315CC       |
| B03_504v  | 100                 | JQ705572.1             | JQ705572.1; F1f; Asia_SE_E; 32; A73G; A249d; A263G              |
| B04_505v  | 100                 | JQ705434.1             | JQ705434.1; A2j; Asia_NE_America_N; 33; C64T; A73G; T146C       |
| B05_507v  | 100                 | JQ706012.1             | JQ706012.1; H3i1; Asia_W_Europe; 12; T152C; A263G; C315CC       |
| B06_508v  | 100                 | JQ704350.1             | JQ704350.1; A2+(64); Asia_NE_America_N; 35; C64T; A73G; T146C   |
| B07_509v  | 100                 | JQ703481.1             | JQ703481.1; L0a1a2; Africa_S_SE; 83; C64T; A93G; G185A          |
| B08_511v  | 100                 | JQ703650.1             | JQ703650.1; H13a1a1a; Asia_W_Europe; 19; T152C; A263G; C309CCT  |
| B09_512v  | 100                 | JQ705099.1             | JQ705099.1; V7a; Europe_S; 21; T72C; A93G; T195C                |
| B10_513v  | 99.73890339         | JQ704728.1             | JQ704728.1; L3e1f; Africa_E; 39; A73G; C150T; A189G             |
| B11_515v  | 100                 | JQ704225.1             | JQ704225.1; H5a1; Asia_W_Europe; 16; T195C; A240G; A263G        |
| B12_516v  | 100                 | JQ705599.1             | JQ705599.1; HV0; Asia_W; 14; T72C; A263G; C309CCCT              |
| C01_519v  | 100                 | JQ702074.1             | JQ702074.1; F1a3a; Asia_SE_E; 37; A73G; A249d; A263G            |
| C02_520v  | 100                 | JQ703138.1             | JQ703138.1; L3e2b1a; Africa_E; 33; A73G; C150T; T195C           |
| C03_521v  | 100                 | JQ705902.1             | JQ705902.1; L3e1a3a; Africa_E; 34; A73G; C150T; A200G           |
| C04_523v  | 100                 | JQ704931.1             | JQ704931.1; L3e3b1; Africa_E; 41; A73G; C150T; T195C            |
| C05_524v  | 100                 | JQ706012.1             | JQ706012.1; H3i1; Asia_W_Europe; 12; T152C; A263G; C315CC       |
| C06_525v  | 99.64912281         | JQ705272.1             | JQ705272.1; U5a1h; Asia_W_Europe_C; 37; A73G; C150T; G207A      |
| C07_528v  | 100                 | JQ705362.1             | JQ705362.1; H1av; Asia_W_Europe; 14; A263G; C309CCCT; T310C     |
| C08_529v  | 99.48364888         | JQ705975.1             | JQ705975.1; H66a; Asia_W_Europe; 11; A263G; C315CC; A750G       |
| C09_532v  | 100                 | JQ705585.1             | JQ705585.1; C1b4; Asia_NE_America_N_S; 47; A73G; G143A; T152C   |
| C10_533v  | 99.65517241         | JQ705150.1             | JQ705150.1; L2a1f; Africa_W_C; 54; A73G; T146C; T152C           |
| C11_534v  | 100                 | JQ705378.1             | JQ705378.1; I1a1a3; Asia_W_SW; 49; A73G; A189G; T199C           |
| C12_536v  | 100                 | JQ705455.1             | JQ705455.1; L2a1e1; Africa_W_C; 56; A73G; T146C; T152C          |
| D01_537v  | 100                 | KC911472_HV            | KC911472_HV; HV; Asia_W; 11; A263G; C315CC; A750G               |
| D02_539v  | 100                 | KC911472_HV            | KC911472_HV; HV; Asia_W; 11; A263G; C315CC; A750G               |
| D03_542v  | 100                 | JQ706018.1             | JQ706018.1; NA; NA; 2; C315CC; T16311C;                         |
| D04_543v  | 100                 | JQ703786.1             | JQ703786.1; J1c3; Asia_W; 27; A73G; A263G; C295T                |
| D05_544v  | 100                 | JQ705489.1             | JQ705489.1; J1c+16261; Asia_W; 29; A73G; G185A; A263G           |
| D06_546v  | 100                 | JQ705886.1             | JQ705886.1; U5a1a2b1; Asia_W_Europe_C; 33; A73G; A263G; C309CCT |
| D07_548v  | 100                 | JQ702675.1             | JQ702675.1; K1a11a; Asia_W; 39; A16T; A73G; C150T               |
| D08_549v  | 100                 | JQ705964.1             | JQ705964.1; J1b1a1c; Asia_W; 39; T10C; A73G; T146C              |
| D09_550v  | 100                 | NC_012920_rCRS         | NC_012920_rCRS; H2a2a1; Asia_W_Europe; 0; REF; REF; REF         |
| D10_551v  | 100                 | JQ705928.1             | JQ705928.1; H11a; Asia_W_Europe; 16; T195C; A263G; C309CCT      |
| D11_553v  | 100                 | JQ706065.1             | JQ706065.1; K1a12a1a; Asia_W; 37; A73G; T195C; A263G            |
| D12_554v  | 100                 | JQ704761.1             | JQ704761.1; K1a4e; Asia_W; 35; A73G; A263G; C309CCT             |

**Supplementary Table S2** BLAST results and statistics<sup>a</sup> for human mtDNA haplotyping and geo-mapping

| Query     | Greatest positive % | Accession (positive %) | Description (positive %)                                        |
|-----------|---------------------|------------------------|-----------------------------------------------------------------|
| A01_HeLa  | 99.82758621         | JQ705753.1             | JQ705753.1; L3b1a; Africa_E; 38; A73G; A263G; C315CC            |
| A03_Caski | 100                 | KC911472_HV            | KC911472_HV; HV; Asia_W; 11; A263G; C315CC; A750G               |
| A04_SiHa  | 99.82758621         | JQ703841.1             | JQ703841.1; X2b+226; Asia_W_America_N; 32; A73G; T195C; A200G   |
| A05_C33-A | 99.82425308         | JQ706015.1             | JQ706015.1; U5a1b1a1; Asia_W_Europe_C; 29; A73G; A263G; C315CC  |
| A06_Doc2C | 100                 | JQ702663.1             | JQ702663.1; U2e1b1; Asia_S_W_Europe; 38; A73G; T152C; T217C     |
| A07_151v  | 100                 | JQ706012.1             | JQ706012.1; H3i1; Asia_W_Europe; 12; T152C; A263G; C315CC       |
| A08_152v  | 100                 | JQ705889.1             | JQ705889.1; I1a1; Asia_W_SW; 42; A73G; T199C; G203A             |
| A09_153v  | 100                 | EU007853_Y             | EU007853_Y; Y1a+16189; Asia_NE; 24; A73G; T146C; A263G          |
| A10_154v  | 100                 | JQ705798.1             | JQ705798.1; V7; Europe_S; 18; T72C; A93G; T152C                 |
| A11_155v  | 100                 | JQ701820.1             | JQ701820.1; C1b2; Asia_NE_America_N_S; 43; A73G; A249d; AA290d  |
| A12_156v  | 100                 | JQ706012.1             | JQ706012.1; H3i1; Asia_W_Europe; 12; T152C; A263G; C315CC       |
| B01_500v  | 100                 | JQ706056.1             | JQ706056.1; K1a31; Asia_W; 30; A73G; C150T; A263G               |
| B02_503v  | 100                 | JQ706012.1             | JQ706012.1; H3i1; Asia_W_Europe; 12; T152C; A263G; C315CC       |
| B03_504v  | 100                 | JQ705572.1             | JQ705572.1; F1f; Asia_SE_E; 32; A73G; A249d; A263G              |
| B04_505v  | 100                 | JQ705434.1             | JQ705434.1; A2j; Asia_NE_America_N; 33; C64T; A73G; T146C       |
| B05_507v  | 100                 | JQ706012.1             | JQ706012.1; H3i1; Asia_W_Europe; 12; T152C; A263G; C315CC       |
| B06_508v  | 100                 | JQ704350.1             | JQ704350.1; A2+(64); Asia_NE_America_N; 35; C64T; A73G; T146C   |
| B07_509v  | 100                 | JQ703481.1             | JQ703481.1; L0a1a2; Africa_S_SE; 83; C64T; A93G; G185A          |
| B08_511v  | 100                 | JQ703650.1             | JQ703650.1; H13a1a1a; Asia_W_Europe; 19; T152C; A263G; C309CCT  |
| B09_512v  | 100                 | JQ705099.1             | JQ705099.1; V7a; Europe_S; 21; T72C; A93G; T195C                |
| B10_513v  | 99.73890339         | JQ704728.1             | JQ704728.1; L3e1f; Africa_E; 39; A73G; C150T; A189G             |
| B11_515v  | 100                 | JQ704225.1             | JQ704225.1; H5a1; Asia_W_Europe; 16; T195C; A240G; A263G        |
| B12_516v  | 100                 | JQ705599.1             | JQ705599.1; HV0; Asia_W; 14; T72C; A263G; C309CCCT              |
| C01_519v  | 100                 | JQ702074.1             | JQ702074.1; F1a3a; Asia_SE_E; 37; A73G; A249d; A263G            |
| C02_520v  | 100                 | JQ703138.1             | JQ703138.1; L3e2b1a; Africa_E; 33; A73G; C150T; T195C           |
| C03_521v  | 100                 | JQ705902.1             | JQ705902.1; L3e1a3a; Africa_E; 34; A73G; C150T; A200G           |
| C04_523v  | 100                 | JQ704931.1             | JQ704931.1; L3e3b1; Africa_E; 41; A73G; C150T; T195C            |
| C05_524v  | 100                 | JQ706012.1             | JQ706012.1; H3i1; Asia_W_Europe; 12; T152C; A263G; C315CC       |
| C06_525v  | 99.64912281         | JQ705272.1             | JQ705272.1; U5a1h; Asia_W_Europe_C; 37; A73G; C150T; G207A      |
| C07_528v  | 100                 | JQ705362.1             | JQ705362.1; H1av; Asia_W_Europe; 14; A263G; C309CCCT; T310C     |
| C08_529v  | 99.48364888         | JQ705975.1             | JQ705975.1; H66a; Asia_W_Europe; 11; A263G; C315CC; A750G       |
| C09_532v  | 100                 | JQ705585.1             | JQ705585.1; C1b4; Asia_NE_America_N_S; 47; A73G; G143A; T152C   |
| C10_533v  | 99.65517241         | JQ705150.1             | JQ705150.1; L2a1f; Africa_W_C; 54; A73G; T146C; T152C           |
| C11_534v  | 100                 | JQ705378.1             | JQ705378.1; I1a1a3; Asia_W_SW; 49; A73G; A189G; T199C           |
| C12_536v  | 100                 | JQ705455.1             | JQ705455.1; L2a1e1; Africa_W_C; 56; A73G; T146C; T152C          |
| D01_537v  | 100                 | KC911472_HV            | KC911472_HV; HV; Asia_W; 11; A263G; C315CC; A750G               |
| D02_539v  | 100                 | KC911472_HV            | KC911472_HV; HV; Asia_W; 11; A263G; C315CC; A750G               |
| D03_542v  | 100                 | JQ706018.1             | JQ706018.1; NA; NA; 2; C315CC; T16311C;                         |
| D04_543v  | 100                 | JQ703786.1             | JQ703786.1; J1c3; Asia_W; 27; A73G; A263G; C295T                |
| D05_544v  | 100                 | JQ705489.1             | JQ705489.1; J1c+16261; Asia_W; 29; A73G; G185A; A263G           |
| D06_546v  | 100                 | JQ705886.1             | JQ705886.1; U5a1a2b1; Asia_W_Europe_C; 33; A73G; A263G; C309CCT |
| D07_548v  | 100                 | JQ702675.1             | JQ702675.1; K1a11a; Asia_W; 39; A16T; A73G; C150T               |
| D08_549v  | 100                 | JQ705964.1             | JQ705964.1; J1b1a1c; Asia_W; 39; T10C; A73G; T146C              |
| D09_550v  | 100                 | NC_012920_rCRS         | NC_012920_rCRS; H2a2a1; Asia_W_Europe; 0; REF; REF; REF         |
| D10_551v  | 100                 | JQ705928.1             | JQ705928.1; H11a; Asia_W_Europe; 16; T195C; A263G; C309CCT      |
| D11_553v  | 100                 | JQ706065.1             | JQ706065.1; K1a12a1a; Asia_W; 37; A73G; T195C; A263G            |
| D12_554v  | 100                 | JQ704761.1             | JQ704761.1; K1a4e; Asia_W; 35; A73G; A263G; C309CCT             |

**Supplementary Table S2** BLAST results and statistics<sup>a</sup> for human mtDNA haplotyping and geo-mapping

| Query     | Greatest HSP length | Accession (HSP length) | Description (HSP length)                                         |
|-----------|---------------------|------------------------|------------------------------------------------------------------|
| A01_HeLa  | 580                 | JQ705753.1             | JQ705753.1; L3b1a; Africa_E; 38; A73G; A263G; C315CC             |
| A03_Caski | 568                 | KC911472_HV            | KC911472_HV; HV; Asia_W; 11; A263G; C315CC; A750G                |
| A04_SiHa  | 580                 | JQ703841.1             | JQ703841.1; X2b+226; Asia_W_America_N; 32; A73G; T195C; A200G    |
| A05_C33-A | 569                 | JQ706015.1             | JQ706015.1; U5a1b1a1; Asia_W_Europe_C; 29; A73G; A263G; C315CC   |
| A06_Doc2C | 579                 | JQ702663.1             | JQ702663.1; U2e1b1; Asia_S_W_Europe; 38; A73G; T152C; T217C      |
| A07_151v  | 580                 | JQ706012.1             | JQ706012.1; H3i1; Asia_W_Europe; 12; T152C; A263G; C315CC        |
| A08_152v  | 578                 | JQ705889.1             | JQ705889.1; I1a1; Asia_W_SW; 42; A73G; T199C; G203A              |
| A09_153v  | 580                 | JQ702841.1             | JQ702841.1; H49a; Asia_W_Europe; 13; A263G; C309CCCT; T310C      |
| A10_154v  | 581                 | JQ705798.1             | JQ705798.1; V7; Europe_S; 18; T72C; A93G; T152C                  |
| A11_155v  | 580                 | JQ701820.1             | JQ701820.1; C1b2; Asia_NE_America_N_S; 43; A73G; A249d; AA290d   |
| A12_156v  | 580                 | JQ706012.1             | JQ706012.1; H3i1; Asia_W_Europe; 12; T152C; A263G; C315CC        |
| B01_500v  | 580                 | JQ706056.1             | JQ706056.1; K1a31; Asia_W; 30; A73G; C150T; A263G                |
| B02_503v  | 581                 | JQ706012.1             | JQ706012.1; H3i1; Asia_W_Europe; 12; T152C; A263G; C315CC        |
| B03_504v  | 383                 | JQ704528.1             | JQ704528.1; H3ap; Asia_W_Europe; 15; A73G; T199C; A263G          |
| B04_505v  | 411                 | JQ705434.1             | JQ705434.1; A2j; Asia_NE_America_N; 33; C64T; A73G; T146C        |
| B05_507v  | 368                 | JQ706012.1             | JQ706012.1; H3i1; Asia_W_Europe; 12; T152C; A263G; C315CC        |
| B06_508v  | 580                 | JQ704350.1             | JQ704350.1; A2+(64); Asia_NE_America_N; 35; C64T; A73G; T146C    |
| B07_509v  | 581                 | JQ703481.1             | JQ703481.1; L0a1a2; Africa_S_SE; 83; C64T; A93G; G185A           |
| B08_511v  | 580                 | JQ703650.1             | JQ703650.1; H13a1a1a; Asia_W_Europe; 19; T152C; A263G; C309CCCT  |
| B09_512v  | 567                 | JQ705942.1             | JQ705942.1; V5; Europe_S; 17; T72C; A93G; A263G                  |
| B10_513v  | 581                 | JQ705521.1             | JQ705521.1; L3e1f2; Africa_E; 37; A73G; C150T; A189G             |
| B11_515v  | 580                 | JQ704225.1             | JQ704225.1; H5a1; Asia_W_Europe; 16; T195C; A240G; A263G         |
| B12_516v  | 580                 | JQ704767.1             | JQ704767.1; V+@72; Europe_S; 14; A263G; C309CCCT; T310C          |
| C01_519v  | 580                 | JQ702074.1             | JQ702074.1; F1a3a; Asia_SE_E; 37; A73G; A249d; A263G             |
| C02_520v  | 581                 | JQ703138.1             | JQ703138.1; L3e2b1a; Africa_E; 33; A73G; C150T; T195C            |
| C03_521v  | 581                 | JQ705902.1             | JQ705902.1; L3e1a3a; Africa_E; 34; A73G; C150T; A200G            |
| C04_523v  | 349                 | JQ704931.1             | JQ704931.1; L3e3b1; Africa_E; 41; A73G; C150T; T195C             |
| C05_524v  | 278                 | JQ706012.1             | JQ706012.1; H3i1; Asia_W_Europe; 12; T152C; A263G; C315CC        |
| C06_525v  | 572                 | JQ705180.1             | JQ705180.1; U5b2b4; Asia_W_Europe_C; 33; A73G; C150T; A263G      |
| C07_528v  | 580                 | JQ705362.1             | JQ705362.1; H1av; Asia_W_Europe; 14; A263G; C309CCCT; T310C      |
| C08_529v  | 581                 | JQ705975.1             | JQ705975.1; H66a; Asia_W_Europe; 11; A263G; C315CC; A750G        |
| C09_532v  | 354                 | JQ705222.1             | JQ705222.1; C4a2a1; Asia_NE_America_N_S; 51; A73G; G207A; A249d  |
| C10_533v  | 580                 | JQ705150.1             | JQ705150.1; L2a1f; Africa_W_C; 54; A73G; T146C; T152C            |
| C11_534v  | 354                 | JQ704077.1             | JQ704077.1; I1f; Asia_W_SW; 41; A73G; T199C; T204C               |
| C12_536v  | 384                 | JQ702959.1             | JQ702959.1; T1a1k1; Asia_W; 38; A73G; T146C; T152C               |
| D01_537v  | 377                 | KC911472_HV            | KC911472_HV; HV; Asia_W; 11; A263G; C315CC; A750G                |
| D02_539v  | 309                 | KC911472_HV            | KC911472_HV; HV; Asia_W; 11; A263G; C315CC; A750G                |
| D03_542v  | 580                 | JQ706018.1             | JQ706018.1; NA; NA; 2; C315CC; T16311C;                          |
| D04_543v  | 571                 | JQ701995.1             | JQ701995.1; J1c3f; Asia_W; 30; A73G; A263G; C295T                |
| D05_544v  | 580                 | JQ705489.1             | JQ705489.1; J1c+16261; Asia_W; 29; A73G; G185A; A263G            |
| D06_546v  | 580                 | JQ705886.1             | JQ705886.1; U5a1a2b1; Asia_W_Europe_C; 33; A73G; A263G; C309CCCT |
| D07_548v  | 568                 | JQ705775.1             | JQ705775.1; K1a4d; Asia_W; 37; A73G; A263G; C309CCCT             |
| D08_549v  | 580                 | JQ705964.1             | JQ705964.1; J1b1a1c; Asia_W; 39; T10C; A73G; T146C               |
| D09_550v  | 580                 | NC_012920_rCRS         | NC_012920_rCRS; H2a2a1; Asia_W_Europe; 0; REF; REF; REF          |
| D10_551v  | 580                 | JQ705928.1             | JQ705928.1; H11a; Asia_W_Europe; 16; T195C; A263G; C309CCCT      |
| D11_553v  | 580                 | JQ706065.1             | JQ706065.1; K1a12a1a; Asia_W; 37; A73G; T195C; A263G             |
| D12_554v  | 581                 | JQ704761.1             | JQ704761.1; K1a4e; Asia_W; 35; A73G; A263G; C309CCCT             |

**Supplementary Table S2** BLAST results and statistics<sup>a</sup> for human mtDNA haplotyping and geo-mapping

| Query     | Greatest bit score | Accession (bit score) | Description (bit score)                                          |
|-----------|--------------------|-----------------------|------------------------------------------------------------------|
| A01_HeLa  | 1042.73            | JQ705753.1            | JQ705753.1; L3b1a; Africa_E; 38; A73G; A263G; C315CC             |
| A03_Caski | 1025.6             | KC911472_HV           | KC911472_HV; HV; Asia_W; 11; A263G; C315CC; A750G                |
| A04_SiHa  | 1044.54            | JQ703841.1            | JQ703841.1; X2b+226; Asia_W_America_N; 32; A73G; T195C; A200G    |
| A05_C33-A | 1022.89            | JQ706015.1            | JQ706015.1; U5a1b1a1; Asia_W_Europe_C; 29; A73G; A263G; C315CC   |
| A06_Doc2C | 1045.44            | JQ702663.1            | JQ702663.1; U2e1b1; Asia_S_W_Europe; 38; A73G; T152C; T217C      |
| A07_151v  | 1047.24            | JQ706012.1            | JQ706012.1; H3i1; Asia_W_Europe; 12; T152C; A263G; C315CC        |
| A08_152v  | 1043.63            | JQ705889.1            | JQ705889.1; I1a1; Asia_W_SW; 42; A73G; T199C; G203A              |
| A09_153v  | 1029.21            | JQ702841.1            | JQ702841.1; H49a; Asia_W_Europe; 13; A263G; C309CCCT; T310C      |
| A10_154v  | 1049.04            | JQ705798.1            | JQ705798.1; V7; Europe_S; 18; T72C; A93G; T152C                  |
| A11_155v  | 1047.24            | JQ701820.1            | JQ701820.1; C1b2; Asia_NE_America_N_S; 43; A73G; A249d; AA290d   |
| A12_156v  | 1047.24            | JQ706012.1            | JQ706012.1; H3i1; Asia_W_Europe; 12; T152C; A263G; C315CC        |
| B01_500v  | 1047.24            | JQ706056.1            | JQ706056.1; K1a31; Asia_W; 30; A73G; C150T; A263G                |
| B02_503v  | 1049.04            | JQ706012.1            | JQ706012.1; H3i1; Asia_W_Europe; 12; T152C; A263G; C315CC        |
| B03_504v  | 685.665            | JQ704786.1            | JQ704786.1; T2j; Asia_W; 39; A73G; A249d; A263G                  |
| B04_505v  | 742.471            | JQ705434.1            | JQ705434.1; A2j; Asia_NE_America_N; 33; C64T; A73G; T146C        |
| B05_507v  | 664.926            | JQ706012.1            | JQ706012.1; H3i1; Asia_W_Europe; 12; T152C; A263G; C315CC        |
| B06_508v  | 1038.22            | JQ704350.1            | JQ704350.1; A2+(64); Asia_NE_America_N; 35; C64T; A73G; T146C    |
| B07_509v  | 1049.04            | JQ703481.1            | JQ703481.1; L0a1a2; Africa_S_SE; 83; C64T; A93G; G185A           |
| B08_511v  | 1047.24            | JQ703650.1            | JQ703650.1; H13a1a1a; Asia_W_Europe; 19; T152C; A263G; C309CCCT  |
| B09_512v  | 1021.99            | JQ705099.1            | JQ705099.1; V7a; Europe_S; 21; T72C; A93G; T195C                 |
| B10_513v  | 1040.03            | JQ705521.1            | JQ705521.1; L3e1f2; Africa_E; 37; A73G; C150T; A189G             |
| B11_515v  | 1047.24            | JQ704225.1            | JQ704225.1; H5a1; Asia_W_Europe; 16; T195C; A240G; A263G         |
| B12_516v  | 1042.73            | JQ704767.1            | JQ704767.1; V+@72; Europe_S; 14; A263G; C309CCCT; T310C          |
| C01_519v  | 1047.24            | JQ702074.1            | JQ702074.1; F1a3a; Asia_SE_E; 37; A73G; A249d; A263G             |
| C02_520v  | 1044.54            | JQ703138.1            | JQ703138.1; L3e2b1a; Africa_E; 33; A73G; C150T; T195C            |
| C03_521v  | 1040.03            | JQ705902.1            | JQ705902.1; L3e1a3a; Africa_E; 34; A73G; C150T; A200G            |
| C04_523v  | 630.662            | JQ704931.1            | JQ704931.1; L3e3b1; Africa_E; 41; A73G; C150T; T195C             |
| C05_524v  | 502.623            | JQ706012.1            | JQ706012.1; H3i1; Asia_W_Europe; 12; T152C; A263G; C315CC        |
| C06_525v  | 1020.19            | JQ705272.1            | JQ705272.1; U5a1h; Asia_W_Europe_C; 37; A73G; C150T; G207A       |
| C07_528v  | 1047.24            | JQ705362.1            | JQ705362.1; H1av; Asia_W_Europe; 14; A263G; C309CCCT; T310C      |
| C08_529v  | 1035.52            | JQ705975.1            | JQ705975.1; H66a; Asia_W_Europe; 11; A263G; C315CC; A750G        |
| C09_532v  | 634.269            | JQ705585.1            | JQ705585.1; C1b4; Asia_NE_America_N_S; 47; A73G; G143A; T152C    |
| C10_533v  | 1038.22            | JQ705150.1            | JQ705150.1; L2a1f; Africa_W_C; 54; A73G; T146C; T152C            |
| C11_534v  | 622.547            | JQ705378.1            | JQ705378.1; I1a1a3; Asia_W_SW; 49; A73G; A189G; T199C            |
| C12_536v  | 690.173            | JQ705455.1            | JQ705455.1; L2a1e1; Africa_W_C; 56; A73G; T146C; T152C           |
| D01_537v  | 681.156            | KC911472_HV           | KC911472_HV; HV; Asia_W; 11; A263G; C315CC; A750G                |
| D02_539v  | 558.527            | KC911472_HV           | KC911472_HV; HV; Asia_W; 11; A263G; C315CC; A750G                |
| D03_542v  | 1047.24            | JQ706018.1            | JQ706018.1; NA; NA; 2; C315CC; T16311C;                          |
| D04_543v  | 1024.7             | JQ703786.1            | JQ703786.1; J1c3; Asia_W; 27; A73G; A263G; C295T                 |
| D05_544v  | 1047.24            | JQ705489.1            | JQ705489.1; J1c+16261; Asia_W; 29; A73G; G185A; A263G            |
| D06_546v  | 1047.24            | JQ705886.1            | JQ705886.1; U5a1a2b1; Asia_W_Europe_C; 33; A73G; A263G; C309CCCT |
| D07_548v  | 1017.48            | JQ702675.1            | JQ702675.1; K1a11a; Asia_W; 39; A16T; A73G; C150T                |
| D08_549v  | 1047.24            | JQ705964.1            | JQ705964.1; J1b1a1c; Asia_W; 39; T10C; A73G; T146C               |
| D09_550v  | 1047.24            | NC_012920_rCRS        | NC_012920_rCRS; H2a2a1; Asia_W_Europe; 0; REF; REF; REF          |
| D10_551v  | 1047.24            | JQ705928.1            | JQ705928.1; H11a; Asia_W_Europe; 16; T195C; A263G; C309CCCT      |
| D11_553v  | 1047.24            | JQ706065.1            | JQ706065.1; K1a12a1a; Asia_W; 37; A73G; T195C; A263G             |
| D12_554v  | 1049.04            | JQ704761.1            | JQ704761.1; K1a4e; Asia_W; 35; A73G; A263G; C309CCCT             |

<sup>a</sup> BLAST statistics nomenclature and definitions from left to right of table columns.

HSP (n), Number of high scoring pairs from the source database.

Lowest E-val, Lowest Expect value.

Accession (E-val), Accession name of the matched database sequence with the lowest E-value.

Hit, Name of the sequence found in the BLAST search with the max score.

Total score, Total alignment score for all HSPs.

Max score, Maximum (best) score or highest alignment score of all HSPs.

Min E-value, Minimum (best) e-value of all HSPs.

Max bit score, Maximum (best) bit score of all HSPs.

Max id, Maximum number of identical residues in the query and Hit sequence.

Max %id, Percentage of maximum identical residues in the query and Hit sequence.

Max pos, Maximum number of similar but not necessarily identical residues in the query and Hit sequence.

Max %pos, Percentage of maximum similar but not necessarily identical residues in the query and Hit sequence.
