# Supplementary material for: A Customized Human Mitochondrial DNA Database (hMITO DB v1.0) for Rapid Sequence Analysis, Haplotyping and Geo-Mapping to Advance Translational Mitogenomics
Source: Preprints.org preprint supplement (doi:10.20944/preprints202307.1891.v1), 2023-07-27
Supplement: Supplementary file 2 [file supplementary]

**Supplementary Table S4** Mitochondrial control region primers

| Primer name <sup>a</sup> | Primer sequence <sup>b</sup>                         |
|--------------------------|------------------------------------------------------|
| N11_F15989-NxSeq-Rd1     | CACTCTTCCCTACACGACGCTCTCCGATCTcccaaagctaagattcta     |
| N11_R16222-NxSeq-Rd2     | CAGACGTGTGCTCTTCCGATCTggttgattgctgtacttgcttg         |
| N13_F16347-NxSeq-Rd1     | CACTCTTCCCTACACGACGCTCTTCCGATCTcaaatcccttctcgccc     |
| N13_R006-NxSeq-Rd2       | CAGACGTGTGCTCTTCCGATCTgtgatccatcgatgtctt             |
| N22_F140m-NxSeq-Rd1      | CACTCTTCCCTACACGACGCTCTTCCGATCTcctgccYcatYcYattattta |
| N22_R381-NxSeq-Rd2       | CAGACGTGTGCTCTTCCGATCTgctggtgtagggttcttg             |
| N12_F16159m-NxSeq-Rd1    | CACTCTTCCCTACACGACGCTCTTCCGATCTcataaaaacccaaYccacat  |
| N12_R16400-NxSeq-Rd2     | CAGACGTGTGCTCTTCCGATCTgtcaagggaccctatctga            |
| N21_F16524-NxSeq-Rd1     | CACTCTTCCCTACACGACGCTCTTCCGATCTaagcctaaatagcccacacg  |
| N21_R187-NxSeq-Rd2       | CAGACGTGTGCTCTTCCGATCTcgctgtaattgaacgta              |
| N30_F335g-NxSeq-Rd1      | CACTCTTCCCTACACGACGCTCTTCCGATCTaaacacatctctgccagacc  |
| N30_R569m-NxSeq-Rd2      | CAGACGTGTGCTCTTCCGATCTggtgtcttggggttggtt             |

<sup>a</sup> *Nn* is primer nomenclature of Lee et al. [18]. *F<sub>n</sub>*, forward primer; *R<sub>n</sub>*, reverse primer; *n* is 5' starting position on the mtDNA.

<sup>b</sup> Sequence data with NxSeq Universal forward or reverse sequence in upper case and mitochondrial sequence in lower case.
