# Supplementary material for: A Customized Human Mitochondrial DNA Database (hMITO DB v1.0) for Rapid Sequence Analysis, Haplotyping and Geo-Mapping to Advance Translational Mitogenomics
Source: Preprints.org preprint supplement (doi:10.20944/preprints202307.1891.v1), 2023-07-27
Supplement: Supplementary file 3 [file supplementary]

**Supplementary Table S3** Human mitochondrial database (hMITO DB v1.0) metadata

| Row | Name (accession no.) | Description                                                    | Size  | Geo_Region          | Haplogroup | Macro_Haplo | Macro_Haplo2 | Total Variants |
|-----|----------------------|----------------------------------------------------------------|-------|---------------------|------------|-------------|--------------|----------------|
| 1   | JQ701803.1           | JQ701803.1; U5b1b1e; Asia_W_Europe_C; 32; A73G; C150T; T152C   | 16570 | Asia_W_Europe_C     | U5b1b1e    | U           | U5           | 32             |
| 2   | JQ701804.1           | JQ701804.1; T1a1; Asia_W; 33; A73G; T152C; A263G               | 16569 | Asia_W              | T1a1       | T           | T            | 33             |
| 3   | JQ701805.1           | JQ701805.1; N1b1a5; Africa_NE_Asia_W; 39; A73G; T152C; A263G   | 16570 | Africa_NE_Asia_W    | N1b1a5     | N           | N1           | 39             |
| 4   | JQ701806.1           | JQ701806.1; H1j; Asia_W_Europe; 15; A263G; C309CCT; T310C      | 16570 | Asia_W_Europe       | H1j        | H           | H            | 15             |
| 5   | JQ701807.1           | JQ701807.1; J2a1a1; Asia_W; 41; A73G; G75A; C150T              | 16568 | Asia_W              | J2a1a1     | J           | J            | 41             |
| 6   | JQ701808.1           | JQ701808.1; K2a9; Asia_W; 36; A73G; T146C; A263G               | 16569 | Asia_W              | K2a9       | K           | K            | 36             |
| 7   | JQ701809.1           | JQ701809.1; H10e; Asia_W_Europe; 12; A263G; C309CCT; T310C     | 16570 | Asia_W_Europe       | H10e       | H           | H            | 12             |
| 8   | JQ701810.1           | JQ701810.1; K1a4a1a2b; Asia_W; 42; A73G; T146C; A263G          | 16572 | Asia_W              | K1a4a1a2b  | K           | K            | 42             |
| 9   | JQ701811.1           | JQ701811.1; K2a2a1; Asia_W; 36; A73G; T146C; T152C             | 16569 | Asia_W              | K2a2a1     | K           | K            | 36             |
| 10  | JQ701812.1           | JQ701812.1; H2a5b1; Asia_W_Europe; 11; A249d; A263G; C309CCCT  | 16570 | Asia_W_Europe       | H2a5b1     | H           | H            | 11             |
| 11  | JQ701813.1           | JQ701813.1; H1bt1; Asia_W_Europe; 13; A263G; C315CC; A750G     | 16569 | Asia_W_Europe       | H1bt1      | H           | H            | 13             |
| 12  | JQ701814.1           | JQ701814.1; L2a1f1; Africa_W_C; 54; A73G; T146C; T152C         | 16569 | Africa_W_C          | L2a1f1     | L2          | L2           | 54             |
| 13  | JQ701815.1           | JQ701815.1; H60a; Asia_W_Europe; 15; A73G; C150T; A263G        | 16570 | Asia_W_Europe       | H60a       | H           | H            | 15             |
| 14  | JQ701816.1           | JQ701816.1; H13a2b1; Asia_W_Europe; 15; A263G; C315CC; G709A   | 16570 | Asia_W_Europe       | H13a2b1    | H           | H            | 15             |
| 15  | JQ701817.1           | JQ701817.1; X2d2; Asia_W_America_N; 33; A73G; T195C; A263G     | 16571 | Asia_W_America_N    | X2d2       | X           | X            | 33             |
| 16  | JQ701818.1           | JQ701818.1; H13a1a1; Asia_W_Europe; 15; C150T; A263G; T310C    | 16569 | Asia_W_Europe       | H13a1a1    | H           | H            | 15             |
| 17  | JQ701819.1           | JQ701819.1; H2a1j; Asia_W_Europe; 11; A263G; C309CCT; T310C    | 16570 | Asia_W_Europe       | H2a1j      | H           | H            | 11             |
| 18  | JQ701820.1           | JQ701820.1; C1b2; Asia_NE_America_N_S; 43; A73G; A249d; AA290d | 16564 | Asia_NE_America_N_S | C1b2       | C           | C            | 43             |
| 19  | JQ701821.1           | JQ701821.1; J1c7; Asia_W; 33; A73G; G185A; G228A               | 16569 | Asia_W              | J1c7       | J           | J            | 33             |
| 20  | JQ701822.1           | JQ701822.1; J1c3e1; Asia_W; 34; A73G; C150T; G185A             | 16569 | Asia_W              | J1c3e1     | J           | J            | 34             |
| 21  | JQ701823.1           | JQ701823.1; L1b1a3b; Africa_C; 81; A73G; T152C; C182T          | 16567 | Africa_C            | L1b1a3b    | L1          | L1           | 81             |
| 22  | JQ701824.1           | JQ701824.1; W3b1; Asia_W; 36; A73G; C194T; T195C               | 16570 | Asia_W              | W3b1       | W           | W            | 36             |
| 23  | JQ701825.1           | JQ701825.1; H1n+146; Asia_W_Europe; 13; T146C; A263G; C309CCCT | 16571 | Asia_W_Europe       | H1n+146    | H           | H            | 13             |
| 24  | JQ701826.1           | JQ701826.1; H2a5b; Asia_W_Europe; 9; A263G; C309CCT; T310C     | 16570 | Asia_W_Europe       | H2a5b      | H           | H            | 9              |
| 25  | JQ701827.1           | JQ701827.1; W5a; Asia_W; 37; A73G; A189G; C194T                | 16569 | Asia_W              | W5a        | W           | W            | 37             |
| 26  | JQ701828.1           | JQ701828.1; T2b5a1; Asia_W; 39; A73G; A263G; C309CCT           | 16571 | Asia_W              | T2b5a1     | T           | T            | 39             |
| 27  | JQ701829.1           | JQ701829.1; L3e2b1a2; Africa_E; 35; A73G; C150T; T195C         | 16569 | Africa_E            | L3e2b1a2   | L3          | L3           | 35             |
| 28  | JQ701830.1           | JQ701830.1; H1a3; Asia_W_Europe; 15; A73G; A263G; C309CCT      | 16570 | Asia_W_Europe       | H1a3       | H           | H            | 15             |
| 29  | JQ701831.1           | JQ701831.1; H1c1; Asia_W_Europe; 13; A263G; C315CC; T477C      | 16571 | Asia_W_Europe       | H1c1       | H           | H            | 13             |
| 30  | JQ701832.1           | JQ701832.1; T2b2b1; Asia_W; 34; A73G; A263G; C315CC            | 16569 | Asia_W              | T2b2b1     | T           | T            | 34             |
| 31  | JQ701833.1           | JQ701833.1; L2b1a3; Africa_W_C; 69; A73G; C150T; T152C         | 16567 | Africa_W_C          | L2b1a3     | L2          | L2           | 69             |
| 32  | JQ701834.1           | JQ701834.1; U5a1a1a; Asia_W_Europe_C; 29; A73G; T152C; A263G   | 16570 | Asia_W_Europe_C     | U5a1a1a    | U           | U5           | 29             |
| 33  | JQ701835.1           | JQ701835.1; K1a4a1; Asia_W; 38; A73G; A153G; A263G             | 16569 | Asia_W              | K1a4a1     | K           | K            | 38             |
| 34  | JQ701836.1           | JQ701836.1; H2a2b1a1; Asia_W_Europe; 9; A263G; C309CCCT; T310C | 16571 | Asia_W_Europe       | H2a2b1a1   | H           | H            | 9              |
| 35  | JQ701837.1           | JQ701837.1; W1c1; Asia_W; 36; A73G; A189G; T195C               | 16569 | Asia_W              | W1c1       | W           | W            | 36             |
| 36  | JQ701838.1           | JQ701838.1; K1a4d; Asia_W; 34; A73G; A263G; C315CC             | 16567 | Asia_W              | K1a4d      | K           | K            | 34             |
| 37  | JQ701839.1           | JQ701839.1; H4a1a1a; Asia_W_Europe; 19; A73G; A263G; C309CCT   | 16568 | Asia_W_Europe       | H4a1a1a    | H           | H            | 19             |
| 38  | JQ701840.1           | JQ701840.1; T2b; Asia_W; 36; A73G; A263G; C309CCCT             | 16569 | Asia_W              | T2b        | T           | T            | 36             |
| 39  | JQ701841.1           | JQ701841.1; U4a2; Asia_N_Europe_N; 30; A73G; T195C; A263G      | 16568 | Asia_N_Europe_N     | U4a2       | U           | U4           | 30             |
| 40  | JQ701842.1           | JQ701842.1; H13a1a3; Asia_W_Europe; 14; A263G; C309CCT; T310C  | 16570 | Asia_W_Europe       | H13a1a3    | H           | H            | 14             |
| 41  | JQ701843.1           | JQ701843.1; H4; Asia_W_Europe; 16; T152C; A263G; C309CCT       | 16568 | Asia_W_Europe       | H4         | H           | H            | 16             |

**Supplementary Table S3** Human mitochondrial database (hMITO DB v1.0) metadata

| Row | Name (accession no.) | Description                                                      | Size  | Geo_Region            | Haplogroup | Macro_Haplo | Macro_Haplo2 | Total Variants |
|-----|----------------------|------------------------------------------------------------------|-------|-----------------------|------------|-------------|--------------|----------------|
| 42  | JQ701844.1           | JQ701844.1; W3a1; Asia_W; 38; T10C; A73G; T152C                  | 16570 | Asia_W                | W3a1       | W           | W            | 38             |
| 43  | JQ701845.1           | JQ701845.1; K1c2; Asia_W; 36; T55C; A73G; T146C                  | 16568 | Asia_W                | K1c2       | K           | K            | 36             |
| 44  | JQ701846.1           | JQ701846.1; H1bv1; Asia_W_Europe; 15; A263G; C309CCCT; T310C     | 16571 | Asia_W_Europe         | H1bv1      | H           | H            | 15             |
| 45  | JQ701847.1           | JQ701847.1; J1b1a1a; Asia_W; 37; A73G; C242T; A263G              | 16569 | Asia_W                | J1b1a1a    | J           | J            | 37             |
| 46  | JQ701848.1           | JQ701848.1; H2a1a2; Asia_W_Europe; 13; A263G; C315CC; A750G      | 16569 | Asia_W_Europe         | H2a1a2     | H           | H            | 13             |
| 47  | JQ701849.1           | JQ701849.1; H10; Asia_W_Europe; 10; A263G; C309CCCT; T310C       | 16570 | Asia_W_Europe         | H10        | H           | H            | 10             |
| 48  | JQ701850.1           | JQ701850.1; H7; Asia_W_Europe; 12; T152C; A263G; C309CCCT        | 16570 | Asia_W_Europe         | H7         | H           | H            | 12             |
| 49  | JQ701851.1           | JQ701851.1; J1c2h; Asia_W; 34; A73G; G185A; A188G                | 16569 | Asia_W                | J1c2h      | J           | J            | 34             |
| 50  | JQ701852.1           | JQ701852.1; J1b1a1; Asia_W; 37; A73G; G185A; G228A               | 16569 | Asia_W                | J1b1a1     | J           | J            | 37             |
| 51  | JQ701853.1           | JQ701853.1; T2e; Asia_W; 34; A73G; C150T; A263G                  | 16570 | Asia_W                | T2e        | T           | T            | 34             |
| 52  | JQ701854.1           | JQ701854.1; J1c3f; Asia_W; 32; A73G; G228A; A263G                | 16569 | Asia_W                | J1c3f      | J           | J            | 32             |
| 53  | JQ701855.1           | JQ701855.1; A2ak; Asia_NE_America_N; 41; C64T; A73G; T146C       | 16569 | Asia_NE_America_N     | A2ak       | A           | A            | 41             |
| 54  | JQ701856.1           | JQ701856.1; K1a2a1; Asia_W; 37; A73G; A263G; C309CCCT            | 16570 | Asia_W                | K1a2a1     | K           | K            | 37             |
| 55  | JQ701857.1           | JQ701857.1; U2e1c1; Asia_S_W_Europe; 44; A73G; T152C; A200G      | 16571 | Asia_S_W_Europe       | U2e1c1     | U           | U2           | 44             |
| 56  | JQ701858.1           | JQ701858.1; K1a1b2a1a; Asia_W; 41; A73G; C114T; T152C            | 16569 | Asia_W                | K1a1b2a1a  | K           | K            | 41             |
| 57  | JQ701859.1           | JQ701859.1; J1c7a; Asia_W; 34; A73G; G185A; G228A                | 16570 | Asia_W                | J1c7a      | J           | J            | 34             |
| 58  | JQ701860.1           | JQ701860.1; H10b; Asia_W_Europe; 11; A263G; C309CCCT; T310C      | 16570 | Asia_W_Europe         | H10b       | H           | H            | 11             |
| 59  | JQ701861.1           | JQ701861.1; H1+16189; Asia_W_Europe; 13; A263G; C309CCCT; T310C  | 16571 | Asia_W_Europe         | H1+16189   | H           | H            | 13             |
| 60  | JQ701862.1           | JQ701862.1; B2; Asia_SE_E_America_N_S; 36; A73G; A263G; C309CCCT | 16563 | Asia_SE_E_America_N_S | B2         | B           | B            | 36             |
| 61  | JQ701863.1           | JQ701863.1; H1ag1; Asia_W_Europe; 12; A263G; C309CCCT; T310C     | 16570 | Asia_W_Europe         | H1ag1      | H           | H            | 12             |
| 62  | JQ701864.1           | JQ701864.1; H3h6; Asia_W_Europe; 16; A263G; C309CCCT; T310C      | 16570 | Asia_W_Europe         | H3h6       | H           | H            | 16             |
| 63  | JQ701865.1           | JQ701865.1; H5; Asia_W_Europe; 15; A263G; C309CCCT; T310C        | 16570 | Asia_W_Europe         | H5         | H           | H            | 15             |
| 64  | JQ701866.1           | JQ701866.1; U5a1a1d1; Asia_W_Europe_C; 32; A73G; G185A; A189G    | 16570 | Asia_W_Europe_C       | U5a1a1d1   | U           | U5           | 32             |
| 65  | JQ701867.1           | JQ701867.1; T2b37; Asia_W; 36; A73G; T152C; A263G                | 16569 | Asia_W                | T2b37      | T           | T            | 36             |
| 66  | JQ701868.1           | JQ701868.1; D1f3; Asia_E_America_N_S; 40; A73G; T146C; A263G     | 16570 | Asia_E_America_N_S    | D1f3       | D           | D            | 40             |
| 67  | JQ701869.1           | JQ701869.1; U5a1a1; Asia_N_Europe_N; 30; A73G; T146C; A263G      | 16570 | Asia_N_Europe_N       | U5a1a1     | U           | U4           | 30             |
| 68  | JQ701870.1           | JQ701870.1; J1c15; Asia_W; 34; A73G; G185A; G228A                | 16568 | Asia_W                | J1c15      | J           | J            | 34             |
| 69  | JQ701871.1           | JQ701871.1; X2b5; Asia_W_America_N; 34; A73G; A153G; T195C       | 16569 | Asia_W_America_N      | X2b5       | X           | X            | 34             |
| 70  | JQ701872.1           | JQ701872.1; H72; Asia_W_Europe; 12; A263G; C315CC; A750G         | 16569 | Asia_W_Europe         | H72        | H           | H            | 12             |
| 71  | JQ701873.1           | JQ701873.1; H1b1+16362; Asia_W_Europe; 16; T152C; A263G; C315CC  | 16567 | Asia_W_Europe         | H1b1+16362 | H           | H            | 16             |
| 72  | JQ701874.1           | JQ701874.1; H1e2; Asia_W_Europe; 12; A263G; C315CC; A750G        | 16569 | Asia_W_Europe         | H1e2       | H           | H            | 12             |
| 73  | JQ701875.1           | JQ701875.1; H5a4a1a; Asia_W_Europe; 20; A263G; T282C; C315CC     | 16569 | Asia_W_Europe         | H5a4a1a    | H           | H            | 20             |
| 74  | JQ701876.1           | JQ701876.1; U4b1a2b; Asia_N_Europe_N; 36; A73G; T195C; A263G     | 16570 | Asia_N_Europe_N       | U4b1a2b    | U           | U4           | 36             |
| 75  | JQ701877.1           | JQ701877.1; H3; Asia_W_Europe; 9; A263G; C315CC; A750G           | 16569 | Asia_W_Europe         | H3         | H           | H            | 9              |
| 76  | JQ701878.1           | JQ701878.1; J1c2; Asia_W; 32; A73G; G185A; A188G                 | 16569 | Asia_W                | J1c2       | J           | J            | 32             |
| 77  | JQ701879.1           | JQ701879.1; H1h1; Asia_W_Europe; 15; A263G; C309CCCT; T310C      | 16570 | Asia_W_Europe         | H1h1       | H           | H            | 15             |
| 78  | JQ701880.1           | JQ701880.1; T2a1a7; Asia_W; 35; A73G; A263G; C315CC              | 16569 | Asia_W                | T2a1a7     | T           | T            | 35             |
| 79  | JQ701881.1           | JQ701881.1; H1ax; Asia_W_Europe; 11; A263G; C315CC; A750G        | 16569 | Asia_W_Europe         | H1ax       | H           | H            | 11             |
| 80  | JQ701882.1           | JQ701882.1; H5; Asia_W_Europe; 17; A263G; C315CC; C456T          | 16569 | Asia_W_Europe         | H5         | H           | H            | 17             |
| 81  | JQ701883.1           | JQ701883.1; K2b1a; Asia_W; 35; A73G; T146C; A263G                | 16570 | Asia_W                | K2b1a      | K           | K            | 35             |
| 82  | JQ701884.1           | JQ701884.1; K2a; Asia_W; 33; A73G; T146C; T152C                  | 16569 | Asia_W                | K2a        | K           | K            | 33             |

**Supplementary Table S3** Human mitochondrial database (hMITO DB v1.0) metadata

| Row | Name (accession no.) | Description                                                    | Size  | Geo_Region          | Haplogroup | Macro_Haplo | Macro_Haplo2 | Total Variants |
|-----|----------------------|----------------------------------------------------------------|-------|---------------------|------------|-------------|--------------|----------------|
| 83  | JQ701885.1           | JQ701885.1; H2c; Asia_W_Europe; 13; T152C; A263G; C309CCT      | 16568 | Asia_W_Europe       | H2c        | H           | H            | 13             |
| 84  | JQ701886.1           | JQ701886.1; X2b5; Asia_W_America_N; 34; A73G; A153G; T195C     | 16569 | Asia_W_America_N    | X2b5       | X           | X            | 34             |
| 85  | JQ701887.1           | JQ701887.1; U2e1; Asia_S_W_Europe; 42; A73G; T152C; T217C      | 16572 | Asia_S_W_Europe     | U2e1       | U           | U2           | 42             |
| 86  | JQ701888.1           | JQ701888.1; H1a; Asia_W_Europe; 15; A73G; A153G; A263G         | 16570 | Asia_W_Europe       | H1a        | H           | H            | 15             |
| 87  | JQ701889.1           | JQ701889.1; H; Asia_W_Europe; 15; A263G; C309CCCT; T310C       | 16571 | Asia_W_Europe       | H          | H           | H            | 15             |
| 88  | JQ701890.1           | JQ701890.1; U2e2a1d; Asia_S_W_Europe; 42; A73G; T152C; T217C   | 16570 | Asia_S_W_Europe     | U2e2a1d    | U           | U2           | 42             |
| 89  | JQ701891.1           | JQ701891.1; C1b11; Asia_NE_America_N_S; 48; A73G; A249d; A263G | 16566 | Asia_NE_America_N_S | C1b11      | C           | C            | 48             |
| 90  | JQ701892.1           | JQ701892.1; H15a1a1; Asia_W_Europe; 15; T55C; A56AC; A263G     | 16571 | Asia_W_Europe       | H15a1a1    | H           | H            | 15             |
| 91  | JQ701893.1           | JQ701893.1; H; Asia_W_Europe; 12; A200G; A263G; C309CCCT       | 16571 | Asia_W_Europe       | H          | H           | H            | 12             |
| 92  | JQ701894.1           | JQ701894.1; I5a2+16086; Asia_W_SW; 36; A73G; T152C; T199C      | 16571 | Asia_W_SW           | I5a2+16086 | I           | I            | 36             |
| 93  | JQ701895.1           | JQ701895.1; K1b1a1a; Asia_W; 44; A73G; T152C; T199C            | 16572 | Asia_W              | K1b1a1a    | K           | K            | 44             |
| 94  | JQ701896.1           | JQ701896.1; H5a3a2; Asia_W_Europe; 17; T152C; A263G; C309CCT   | 16570 | Asia_W_Europe       | H5a3a2     | H           | H            | 17             |
| 95  | JQ701897.1           | JQ701897.1; T2b4f; Asia_W; 36; A73G; T152C; A263G              | 16570 | Asia_W              | T2b4f      | T           | T            | 36             |
| 96  | JQ701898.1           | JQ701898.1; H3; Asia_W_Europe; 11; A263G; C315CC; A523ACA      | 16571 | Asia_W_Europe       | H3         | H           | H            | 11             |
| 97  | JQ701899.1           | JQ701899.1; H1a(H1ar); Asia_W_Europe; 4; A183G; C315CC; A1555G | 16569 | Asia_W_Europe       | H1a(H1ar)  | H           | H            | 4              |
| 98  | JQ701900.1           | JQ701900.1; I1a1e; Asia_W_SW; 43; A73G; T199C; G203A           | 16570 | Asia_W_SW           | I1a1e      | I           | I            | 43             |
| 99  | JQ701901.1           | JQ701901.1; L1c1c; Africa_C; 86; A73G; T152C; C182T            | 16566 | Africa_C            | L1c1c      | L1          | L1           | 86             |
| 100 | JQ701902.1           | JQ701902.1; J1b1a1; Asia_W; 39; A73G; C242T; A263G             | 16569 | Asia_W              | J1b1a1     | J           | J            | 39             |
| 101 | JQ701903.1           | JQ701903.1; U5a1a1d1; Asia_W_Europe_C; 35; A73G; G185A; A189G  | 16572 | Asia_W_Europe_C     | U5a1a1d1   | U           | U5           | 35             |
| 102 | JQ701904.1           | JQ701904.1; H2a2a; Asia_W_Europe; 7; T195C; A263G; C309CCCT    | 16571 | Asia_W_Europe       | H2a2a      | H           | H            | 7              |
| 103 | JQ701905.1           | JQ701905.1; X2k; Asia_W_America_N; 32; A73G; A153G; T195C      | 16568 | Asia_W_America_N    | X2k        | X           | X            | 32             |
| 104 | JQ701906.1           | JQ701906.1; A2d1; Asia_NE_America_N; 36; C64T; A73G; T146C     | 16559 | Asia_NE_America_N   | A2d1       | A           | A            | 36             |
| 105 | JQ701907.1           | JQ701907.1; J1b1a1b; Asia_W; 38; A73G; C242T; A263G            | 16569 | Asia_W              | J1b1a1b    | J           | J            | 38             |
| 106 | JQ701908.1           | JQ701908.1; HV7; Asia_W; 17; A263G; C315CC; A523ACACA          | 16573 | Asia_W              | HV7        | HV          | HV           | 17             |
| 107 | JQ701909.1           | JQ701909.1; I4a; Asia_W_SW; 36; A73G; T199C; T204C             | 16570 | Asia_W_SW           | I4a        | I           | I            | 36             |
| 108 | JQ701910.1           | JQ701910.1; H59; Asia_W_Europe; 12; A263G; C309CCT; T310C      | 16572 | Asia_W_Europe       | H59        | H           | H            | 12             |
| 109 | JQ701911.1           | JQ701911.1; U4b1b1; Asia_N_Europe_N; 32; A73G; T146C; T152C    | 16569 | Asia_N_Europe_N     | U4b1b1     | U           | U4           | 32             |
| 110 | JQ701912.1           | JQ701912.1; W5b1a; Asia_W; 38; A56ATC; TG65-; A73G             | 16569 | Asia_W              | W5b1a      | W           | W            | 38             |
| 111 | JQ701913.1           | JQ701913.1; U5a1a1; Asia_W_Europe_C; 32; A73G; A263G; C315CC   | 16569 | Asia_W_Europe_C     | U5a1a1     | U           | U5           | 32             |
| 112 | JQ701914.1           | JQ701914.1; L2a1m1a; Africa_W_C; 55; A73G; G143A; T146C        | 16561 | Africa_W_C          | L2a1m1a    | L2          | L2           | 55             |
| 113 | JQ701915.1           | JQ701915.1; U5b2a1a1a; Asia_W_Europe_C; 29; A73G; C150T; A263G | 16569 | Asia_W_Europe_C     | U5b2a1a1a  | U           | U5           | 29             |
| 114 | JQ701916.1           | JQ701916.1; J1b1a1; Asia_W; 37; A73G; C242T; A263G             | 16569 | Asia_W              | J1b1a1     | J           | J            | 37             |
| 115 | JQ701917.1           | JQ701917.1; H7d4; Asia_W_Europe; 16; A263G; C309CCCT; T310C    | 16571 | Asia_W_Europe       | H7d4       | H           | H            | 16             |
| 116 | JQ701918.1           | JQ701918.1; H18; Asia_W_Europe; 12; A263G; C315CC; A523ACA     | 16571 | Asia_W_Europe       | H18        | H           | H            | 12             |
| 117 | JQ701919.1           | JQ701919.1; V18a; Europe_S; 20; T72C; A263G; C309CCCT          | 16571 | Europe_S            | V18a       | V           | V            | 20             |
| 118 | JQ701920.1           | JQ701920.1; J1c3; Asia_W; 30; A73G; G228A; A263G               | 16570 | Asia_W              | J1c3       | J           | J            | 30             |
| 119 | JQ701921.1           | JQ701921.1; J1c5a1; Asia_W; 31; A73G; G185A; G228A             | 16569 | Asia_W              | J1c5a1     | J           | J            | 31             |
| 120 | JQ701922.1           | JQ701922.1; U5a2c3; Asia_W_Europe_C; 31; A73G; A263G; C309CCT  | 16570 | Asia_W_Europe_C     | U5a2c3     | U           | U5           | 31             |
| 121 | JQ701923.1           | JQ701923.1; U7a3b; Asia_W; 37; A73G; C151T; T152C              | 16568 | Asia_W              | U7a3b      | U           | U7           | 37             |
| 122 | JQ701924.1           | JQ701924.1; N1a1a2; Africa_NE_Asia_W; 35; A73G; T152C; T199C   | 16571 | Africa_NE_Asia_W    | N1a1a2     | N           | N1           | 35             |
| 123 | JQ701925.1           | JQ701925.1; H6a1a1; Asia_W_Europe; 18; T239C; A263G; C309CCT   | 16571 | Asia_W_Europe       | H6a1a1     | H           | H            | 18             |

**Supplementary Table S3** Human mitochondrial database (hMITO DB v1.0) metadata

| Row | Name (accession no.) | Description                                                    | Size  | Geo_Region       | Haplogroup | Macro_Haplo | Macro_Haplo2 | Total Variants |
|-----|----------------------|----------------------------------------------------------------|-------|------------------|------------|-------------|--------------|----------------|
| 124 | JQ701926.1           | JQ701926.1; L2a1c4a; Africa_W_C; 52; A73G; G143A; T146C        | 16569 | Africa_W_C       | L2a1c4a    | L2          | L2           | 52             |
| 125 | JQ701927.1           | JQ701927.1; T2b3d; Asia_W; 39; A73G; C151T; T199C              | 16570 | Asia_W           | T2b3d      | T           | T            | 39             |
| 126 | JQ701928.1           | JQ701928.1; X2c1; Asia_W_America_N; 30; A73G; A153G; T195C     | 16569 | Asia_W_America_N | X2c1       | X           | X            | 30             |
| 127 | JQ701929.1           | JQ701929.1; V3c; Europe_S; 17; A263G; C309CCCT; T310C          | 16571 | Europe_S         | V3c        | V           | V            | 17             |
| 128 | JQ701930.1           | JQ701930.1; HV0a1a; Asia_W; 20; T72C; A200G; A263G             | 16568 | Asia_W           | HV0a1a     | HV          | HV           | 20             |
| 129 | JQ701931.1           | JQ701931.1; H1; Asia_W_Europe; 16; A263G; C315CC; A750G        | 16569 | Asia_W_Europe    | H1         | H           | H            | 16             |
| 130 | JQ701932.1           | JQ701932.1; H27e; Asia_W_Europe; 15; C64T; A263G; C309CCT      | 16561 | Asia_W_Europe    | H27e       | H           | H            | 15             |
| 131 | JQ701933.1           | JQ701933.1; H5a2; Asia_W_Europe; 15; A263G; C309CCT; T310C     | 16570 | Asia_W_Europe    | H5a2       | H           | H            | 15             |
| 132 | JQ701934.1           | JQ701934.1; T2c1a2; Asia_W; 39; A73G; A263G; C309CCT           | 16572 | Asia_W           | T2c1a2     | T           | T            | 39             |
| 133 | JQ701935.1           | JQ701935.1; H3h; Asia_W_Europe; 12; A263G; C315CC; A750G       | 16569 | Asia_W_Europe    | H3h        | H           | H            | 12             |
| 134 | JQ701936.1           | JQ701936.1; H60a; Asia_W_Europe; 15; G185A; A263G; C309CCCT    | 16571 | Asia_W_Europe    | H60a       | H           | H            | 15             |
| 135 | JQ701937.1           | JQ701937.1; U4b2a; Asia_S_W_Europe; 32; A73G; A263G; C309CCT   | 16572 | Asia_S_W_Europe  | U4b2a      | U           | U4           | 32             |
| 136 | JQ701938.1           | JQ701938.1; V+@72; Europe_S; 14; A263G; C309CCT; T310C         | 16570 | Europe_S         | V+@72      | V           | V            | 14             |
| 137 | JQ701939.1           | JQ701939.1; T2b28; Asia_W; 36; A73G; A263G; C315CC             | 16569 | Asia_W           | T2b28      | T           | T            | 36             |
| 138 | JQ701940.1           | JQ701940.1; T1a1; Asia_W; 36; A73G; T152C; T195C               | 16570 | Asia_W           | T1a1       | T           | T            | 36             |
| 139 | JQ701941.1           | JQ701941.1; H5a2; Asia_W_Europe; 14; A263G; C309CCCT; T310C    | 16571 | Asia_W_Europe    | H5a2       | H           | H            | 14             |
| 140 | JQ701942.1           | JQ701942.1; I2; Asia_W_SW; 37; A73G; T152C; T199C              | 16572 | Asia_W_SW        | I2         | I           | I            | 37             |
| 141 | JQ701943.1           | JQ701943.1; H8c1; Asia_W_Europe; 19; T146C; T152C; T195C       | 16569 | Asia_W_Europe    | H8c1       | H           | H            | 19             |
| 142 | JQ701944.1           | JQ701944.1; H1a8; Asia_W_Europe; 13; A73G; A263G; C309CCT      | 16570 | Asia_W_Europe    | H1a8       | H           | H            | 13             |
| 143 | JQ701945.1           | JQ701945.1; H1g1; Asia_W_Europe; 12; A263G; C315CC; A750G      | 16569 | Asia_W_Europe    | H1g1       | H           | H            | 12             |
| 144 | JQ701946.1           | JQ701946.1; X2b4; Asia_W_America_N; 32; A73G; A153G; T195C     | 16571 | Asia_W_America_N | X2b4       | X           | X            | 32             |
| 145 | JQ701947.1           | JQ701947.1; U2e2a1d; Asia_S_W_Europe; 40; A73G; T152C; T217C   | 16571 | Asia_S_W_Europe  | U2e2a1d    | U           | U2           | 40             |
| 146 | JQ701948.1           | JQ701948.1; H13a1a; Asia_W_Europe; 16; A153G; A263G; C309CCT   | 16570 | Asia_W_Europe    | H13a1a     | H           | H            | 16             |
| 147 | JQ701949.1           | JQ701949.1; H5a1c1a; Asia_W_Europe; 17; A263G; C315CC; C456T   | 16567 | Asia_W_Europe    | H5a1c1a    | H           | H            | 17             |
| 148 | JQ701950.1           | JQ701950.1; H1a; Asia_W_Europe; 13; A73G; A263G; C309CCT       | 16570 | Asia_W_Europe    | H1a        | H           | H            | 13             |
| 149 | JQ701951.1           | JQ701951.1; H4a1; Asia_W_Europe; 19; T152C; C182T; A263G       | 16567 | Asia_W_Europe    | H4a1       | H           | H            | 19             |
| 150 | JQ701952.1           | JQ701952.1; H1e1a; Asia_W_Europe; 13; A263G; C315CC; A750G     | 16569 | Asia_W_Europe    | H1e1a      | H           | H            | 13             |
| 151 | JQ701953.1           | JQ701953.1; H26c; Asia_W_Europe; 13; T146C; T152C; A263G       | 16569 | Asia_W_Europe    | H26c       | H           | H            | 13             |
| 152 | JQ701954.1           | JQ701954.1; L2c; Africa_W_C; 65; A73G; A93G; A95C              | 16568 | Africa_W_C       | L2c        | L2          | L2           | 65             |
| 153 | JQ701955.1           | JQ701955.1; H6a1b; Asia_W_Europe; 19; A200G; T239C; A263G      | 16570 | Asia_W_Europe    | H6a1b      | H           | H            | 19             |
| 154 | JQ701956.1           | JQ701956.1; H23; Asia_W_Europe; 10; A263G; C315CC; A750G       | 16569 | Asia_W_Europe    | H23        | H           | H            | 10             |
| 155 | JQ701957.1           | JQ701957.1; I4a; Asia_W_SW; 35; A73G; T199C; T204C             | 16569 | Asia_W_SW        | I4a        | I           | I            | 35             |
| 156 | JQ701958.1           | JQ701958.1; U5a1a1d; Asia_W_Europe_C; 31; A73G; G185A; T204C   | 16570 | Asia_W_Europe_C  | U5a1a1d    | U           | U5           | 31             |
| 157 | JQ701959.1           | JQ701959.1; H106; Asia_W_Europe; 14; T146C; A263G; C315CC      | 16569 | Asia_W_Europe    | H106       | H           | H            | 14             |
| 158 | JQ701960.1           | JQ701960.1; H; Asia_W_Europe; 14; A73G; A263G; C309CCT         | 16570 | Asia_W_Europe    | H          | H           | H            | 14             |
| 159 | JQ701961.1           | JQ701961.1; J1c3j; Asia_W; 33; A73G; C150T; G185A              | 16569 | Asia_W           | J1c3j      | J           | J            | 33             |
| 160 | JQ701962.1           | JQ701962.1; K1a3a3; Asia_W; 35; A73G; A263G; C309CCT           | 16570 | Asia_W           | K1a3a3     | K           | K            | 35             |
| 161 | JQ701963.1           | JQ701963.1; H6a1a2b1; Asia_W_Europe; 20; T239C; A263G; C309CCT | 16570 | Asia_W_Europe    | H6a1a2b1   | H           | H            | 20             |
| 162 | JQ701964.1           | JQ701964.1; K1a3a; Asia_W; 34; A73G; A263G; C315CC             | 16569 | Asia_W           | K1a3a      | K           | K            | 34             |
| 163 | JQ701965.1           | JQ701965.1; HV6; Asia_W; 12; A263G; C315CC; A750G              | 16569 | Asia_W           | HV6        | HV          | HV           | 12             |
| 164 | JQ701966.1           | JQ701966.1; H1b1b; Asia_W_Europe; 17; A263G; C309CCCT; T310C   | 16569 | Asia_W_Europe    | H1b1b      | H           | H            | 17             |

**Supplementary Table S3** Human mitochondrial database (hMITO DB v1.0) metadata

| Row | Name (accession no.) | Description                                                     | Size  | Geo_Region        | Haplogroup | Macro_Haplo | Macro_Haplo2 | Total Variants |
|-----|----------------------|-----------------------------------------------------------------|-------|-------------------|------------|-------------|--------------|----------------|
| 165 | JQ701967.1           | JQ701967.1; H3g1; Asia_W_Europe; 16; T152C; A263G; C315CC       | 16569 | Asia_W_Europe     | H3g1       | H           | H            | 16             |
| 166 | JQ701968.1           | JQ701968.1; J1c2b3; Asia_W; 34; A73G; G185A; A188G              | 16570 | Asia_W            | J1c2b3     | J           | J            | 34             |
| 167 | JQ701969.1           | JQ701969.1; H1ai1; Asia_W_Europe; 12; A263G; C309CCCT; T310C    | 16571 | Asia_W_Europe     | H1ai1      | H           | H            | 12             |
| 168 | JQ701970.1           | JQ701970.1; U5a1b1g; Asia_W_Europe_C; 29; A73G; A263G; C315CC   | 16569 | Asia_W_Europe_C   | U5a1b1g    | U           | U5           | 29             |
| 169 | JQ701971.1           | JQ701971.1; V1a; Europe_S; 17; A263G; C315CC; A750G             | 16569 | Europe_S          | V1a        | V           | V            | 17             |
| 170 | JQ701972.1           | JQ701972.1; T2a1a8; Asia_W; 37; A73G; A263G; C309CCCT           | 16570 | Asia_W            | T2a1a8     | T           | T            | 37             |
| 171 | JQ701973.1           | JQ701973.1; K1a4e; Asia_W; 36; A73G; A263G; C309CCCT            | 16570 | Asia_W            | K1a4e      | K           | K            | 36             |
| 172 | JQ701974.1           | JQ701974.1; H5a7; Asia_W_Europe; 14; A263G; C315CC; C456T       | 16569 | Asia_W_Europe     | H5a7       | H           | H            | 14             |
| 173 | JQ701975.1           | JQ701975.1; H31; Asia_W_Europe; 13; T146C; T195C; A263G         | 16571 | Asia_W_Europe     | H31        | H           | H            | 13             |
| 174 | JQ701976.1           | JQ701976.1; A2al; Asia_NE_America_N; 38; C64T; A73G; T146C      | 16567 | Asia_NE_America_N | A2al       | A           | A            | 38             |
| 175 | JQ701977.1           | JQ701977.1; H; Asia_W_Europe; 9; A263G; C315CC; A750G           | 16569 | Asia_W_Europe     | H          | H           | H            | 9              |
| 176 | JQ701978.1           | JQ701978.1; H1i2; Asia_W_Europe; 13; T152C; A263G; C315CC       | 16569 | Asia_W_Europe     | H1i2       | H           | H            | 13             |
| 177 | JQ701979.1           | JQ701979.1; H6a1b; Asia_W_Europe; 19; T239C; A263G; C309CCCT    | 16570 | Asia_W_Europe     | H6a1b      | H           | H            | 19             |
| 178 | JQ701980.1           | JQ701980.1; H1e1a; Asia_W_Europe; 17; T204C; A263G; C315CC      | 16569 | Asia_W_Europe     | H1e1a      | H           | H            | 17             |
| 179 | JQ701981.1           | JQ701981.1; J2b1e; Asia_W; 35; A73G; C150T; T152C               | 16570 | Asia_W            | J2b1e      | J           | J            | 35             |
| 180 | JQ701982.1           | JQ701982.1; T2b13; Asia_W; 35; A73G; A263G; C309CCCT            | 16570 | Asia_W            | T2b13      | T           | T            | 35             |
| 181 | JQ701983.1           | JQ701983.1; H3aj; Asia_W_Europe; 10; A263G; C315CC; A750G       | 16569 | Asia_W_Europe     | H3aj       | H           | H            | 10             |
| 182 | JQ701984.1           | JQ701984.1; H1c4b1; Asia_W_Europe; 13; A263G; C315CC; T477C     | 16569 | Asia_W_Europe     | H1c4b1     | H           | H            | 13             |
| 183 | JQ701985.1           | JQ701985.1; T2e5; Asia_W; 37; A73G; C150T; A200G                | 16570 | Asia_W            | T2e5       | T           | T            | 37             |
| 184 | JQ701986.1           | JQ701986.1; T2b; Asia_W; 35; A73G; A263G; C315CC                | 16569 | Asia_W            | T2b        | T           | T            | 35             |
| 185 | JQ701987.1           | JQ701987.1; H1e2c; Asia_W_Europe; 15; A73G; A263G; C315CC       | 16569 | Asia_W_Europe     | H1e2c      | H           | H            | 15             |
| 186 | JQ701988.1           | JQ701988.1; HV+16311; Asia_W_Europe; 16; A263G; C309CCCT; T310C | 16570 | Asia_W_Europe     | HV+16311   | H           | H            | 16             |
| 187 | JQ701989.1           | JQ701989.1; V12; Europe_S; 14; A263G; C309CCCT; T310C           | 16570 | Europe_S          | V12        | V           | V            | 14             |
| 188 | JQ701990.1           | JQ701990.1; U4b1a2b; Asia_N_Europe_N; 39; A73G; T195C; A263G    | 16570 | Asia_N_Europe_N   | U4b1a2b    | U           | U4           | 39             |
| 189 | JQ701991.1           | JQ701991.1; X2i1; Asia_W_America_N; 29; A73G; A153G; T195C      | 16571 | Asia_W_America_N  | X2i1       | X           | X            | 29             |
| 190 | JQ701992.1           | JQ701992.1; J1c8b; Asia_W; 26; A73G; G185A; A263G               | 16569 | Asia_W            | J1c8b      | J           | J            | 26             |
| 191 | JQ701993.1           | JQ701993.1; H1c+152; Asia_W_Europe; 11; T152C; A263G; C315CC    | 16569 | Asia_W_Europe     | H1c+152    | H           | H            | 11             |
| 192 | JQ701994.1           | JQ701994.1; K1a4a1h; Asia_W; 41; A73G; T152C; A263G             | 16574 | Asia_W            | K1a4a1h    | K           | K            | 41             |
| 193 | JQ701995.1           | JQ701995.1; J1c3f; Asia_W; 30; A73G; A263G; C295T               | 16571 | Asia_W            | J1c3f      | J           | J            | 30             |
| 194 | JQ701996.1           | JQ701996.1; H77; Asia_W_Europe; 10; A263G; A291AA; C315CC       | 16570 | Asia_W_Europe     | H77        | H           | H            | 10             |
| 195 | JQ701997.1           | JQ701997.1; T2a1a2; Asia_W; 36; A73G; A263G; C315CC             | 16569 | Asia_W            | T2a1a2     | T           | T            | 36             |
| 196 | JQ701998.1           | JQ701998.1; H79; Asia_W_Europe; 13; A263G; C309CCCT; T310C      | 16574 | Asia_W_Europe     | H79        | H           | H            | 13             |
| 197 | JQ701999.1           | JQ701999.1; T2b4; Asia_W; 35; A73G; A263G; C309CCCT             | 16570 | Asia_W            | T2b4       | T           | T            | 35             |
| 198 | JQ702000.1           | JQ702000.1; H6a1b3; Asia_W_Europe; 20; A93G; T204C; T239C       | 16571 | Asia_W_Europe     | H6a1b3     | H           | H            | 20             |
| 199 | JQ702001.1           | JQ702001.1; J1b2a; Asia_W; 34; A73G; A263G; C295T               | 16569 | Asia_W            | J1b2a      | J           | J            | 34             |
| 200 | JQ702002.1           | JQ702002.1; H1ah1; Asia_W_Europe; 17; A200G; A263G; C309CCCT    | 16570 | Asia_W_Europe     | H1ah1      | H           | H            | 17             |
| 201 | JQ702003.1           | JQ702003.1; M33c; Asia_S; 37; A73G; A263G; C315CC               | 16569 | Asia_S            | M33c       | M           | M33          | 37             |
| 202 | JQ702004.1           | JQ702004.1; U2e2a1d; Asia_S_W_Europe; 44; A73G; T152C; T217C    | 16570 | Asia_S_W_Europe   | U2e2a1d    | U           | U2           | 44             |
| 203 | JQ702005.1           | JQ702005.1; H1c; Asia_W_Europe; 11; A263G; C315CC; T477C        | 16569 | Asia_W_Europe     | H1c        | H           | H            | 11             |
| 204 | JQ702006.1           | JQ702006.1; H1c5a; Asia_W_Europe; 14; T152C; A249d; A263G       | 16568 | Asia_W_Europe     | H1c5a      | H           | H            | 14             |
| 205 | JQ702007.1           | JQ702007.1; H1r; Asia_W_Europe; 15; T146C; T152C; A263G         | 16571 | Asia_W_Europe     | H1r        | H           | H            | 15             |

**Supplementary Table S3** Human mitochondrial database (hMITO DB v1.0) metadata

| Row | Name (accession no.) | Description                                                     | Size  | Geo_Region           | Haplogroup | Macro_Haplo | Macro_Haplo2 | Total Variants |
|-----|----------------------|-----------------------------------------------------------------|-------|----------------------|------------|-------------|--------------|----------------|
| 206 | JQ702008.1           | JQ702008.1; H1a3; Asia_W_Europe; 12; A73G; T152C; A263G         | 16569 | Asia_W_Europe        | H1a3       | H           | H            | 12             |
| 207 | JQ702009.1           | JQ702009.1; H1n1b; Asia_W_Europe; 16; T146C; A263G; C315CC      | 16571 | Asia_W_Europe        | H1n1b      | H           | H            | 16             |
| 208 | JQ702010.1           | JQ702010.1; H10e3a; Asia_W_Europe; 15; T152C; A263G; C309CCT    | 16570 | Asia_W_Europe        | H10e3a     | H           | H            | 15             |
| 209 | JQ702011.1           | JQ702011.1; M1a8a; Africa_E_Nile Valley; 43; A73G; T195C; A263G | 16571 | Africa_E_Nile Valley | M1a8a      | M           | M1           | 43             |
| 210 | JQ702012.1           | JQ702012.1; T2b4; Asia_W; 34; A73G; A263G; C315CC               | 16569 | Asia_W               | T2b4       | T           | T            | 34             |
| 211 | JQ702013.1           | JQ702013.1; HV0+195; Asia_W; 17; C64T; T72C; T195C              | 16570 | Asia_W               | HV0+195    | HV          | HV           | 17             |
| 212 | JQ702014.1           | JQ702014.1; H56; Asia_W_Europe; 11; T152C; A263G; C309CCT       | 16570 | Asia_W_Europe        | H56        | H           | H            | 11             |
| 213 | JQ702015.1           | JQ702015.1; L2a1l2a1; Africa_W_C; 55; A73G; T146C; T152C        | 16570 | Africa_W_C           | L2a1l2a1   | L2          | L2           | 55             |
| 214 | JQ702016.1           | JQ702016.1; H1c1; Asia_W_Europe; 12; A263G; C315CC; T477C       | 16569 | Asia_W_Europe        | H1c1       | H           | H            | 12             |
| 215 | JQ702017.1           | JQ702017.1; J1c3; Asia_W; 30; A73G; G185A; T195C                | 16569 | Asia_W               | J1c3       | J           | J            | 30             |
| 216 | JQ702018.1           | JQ702018.1; J1c2c; Asia_W; 34; A73G; T146C; G185A               | 16570 | Asia_W               | J1c2c      | J           | J            | 34             |
| 217 | JQ702019.1           | JQ702019.1; H5g; Asia_W_Europe; 13; T146C; A263G; C309CCCT      | 16571 | Asia_W_Europe        | H5g        | H           | H            | 13             |
| 218 | JQ702020.1           | JQ702020.1; J1c1b2a; Asia_W; 35; A73G; G228A; A263G             | 16567 | Asia_W               | J1c1b2a    | J           | J            | 35             |
| 219 | JQ702021.1           | JQ702021.1; U5b2a1a1a; Asia_W_Europe_C; 31; A73G; C150T; A263G  | 16570 | Asia_W_Europe_C      | U5b2a1a1a  | U           | U5           | 31             |
| 220 | JQ702022.1           | JQ702022.1; H13a1a1e; Asia_W_Europe; 16; A263G; C309CCT; T310C  | 16568 | Asia_W_Europe        | H13a1a1e   | H           | H            | 16             |
| 221 | JQ702023.1           | JQ702023.1; I1a1c; Asia_W_SW; 43; A73G; A189G; T199C            | 16572 | Asia_W_SW            | I1a1c      | I           | I            | 43             |
| 222 | JQ702024.1           | JQ702024.1; H1e1a6; Asia_W_Europe; 15; C150T; A263G; C309CCT    | 16570 | Asia_W_Europe        | H1e1a6     | H           | H            | 15             |
| 223 | JQ702025.1           | JQ702025.1; V8; Europe_S; 17; T72C; A263G; C309CCT              | 16570 | Europe_S             | V8         | V           | V            | 17             |
| 224 | JQ702026.1           | JQ702026.1; V1a; Europe_S; 18; T72C; A263G; C309CCCT            | 16571 | Europe_S             | V1a        | V           | V            | 18             |
| 225 | JQ702027.1           | JQ702027.1; J2a1a1a2; Asia_W; 42; A73G; C150T; T152C            | 16571 | Asia_W               | J2a1a1a2   | J           | J            | 42             |
| 226 | JQ702028.1           | JQ702028.1; H1b1a; Asia_W_Europe; 17; A263G; C315CC; A374G      | 16568 | Asia_W_Europe        | H1b1a      | H           | H            | 17             |
| 227 | JQ702029.1           | JQ702029.1; H2a5b; Asia_W_Europe; 11; A263G; C309CCCT; T310C    | 16571 | Asia_W_Europe        | H2a5b      | H           | H            | 11             |
| 228 | JQ702030.1           | JQ702030.1; U5a1a2b1; Asia_W_Europe_C; 33; A73G; A263G; C309CCT | 16570 | Asia_W_Europe_C      | U5a1a2b1   | U           | U5           | 33             |
| 229 | JQ702031.1           | JQ702031.1; K1a2a; Asia_W; 33; A73G; T152C; A263G               | 16569 | Asia_W               | K1a2a      | K           | K            | 33             |
| 230 | JQ702032.1           | JQ702032.1; H3+16311; Asia_W_Europe; 14; T152C; A263G; C309CCCT | 16571 | Asia_W_Europe        | H3+16311   | H           | H            | 14             |
| 231 | JQ702033.1           | JQ702033.1; K2b1a1; Asia_W; 35; A73G; T146C; A263G              | 16569 | Asia_W               | K2b1a1     | K           | K            | 35             |
| 232 | JQ702034.1           | JQ702034.1; H1ao; Asia_W_Europe; 14; A93G; T146C; A263G         | 16569 | Asia_W_Europe        | H1ao       | H           | H            | 14             |
| 233 | JQ702035.1           | JQ702035.1; T1a1; Asia_W; 36; A73G; T152C; T195C                | 16570 | Asia_W               | T1a1       | T           | T            | 36             |
| 234 | JQ702036.1           | JQ702036.1; T2a1a6; Asia_W; 37; A73G; A263G; C309CCT            | 16570 | Asia_W               | T2a1a6     | T           | T            | 37             |
| 235 | JQ702037.1           | JQ702037.1; H26a1a; Asia_W_Europe; 14; A263G; C315CC; G709A     | 16569 | Asia_W_Europe        | H26a1a     | H           | H            | 14             |
| 236 | JQ702038.1           | JQ702038.1; U5a1a1; Asia_W_Europe_C; 27; A73G; A263G; C309CCT   | 16570 | Asia_W_Europe_C      | U5a1a1     | U           | U5           | 27             |
| 237 | JQ702039.1           | JQ702039.1; H1ai1; Asia_W_Europe; 13; A263G; C309CCT; T310C     | 16570 | Asia_W_Europe        | H1ai1      | H           | H            | 13             |
| 238 | JQ702040.1           | JQ702040.1; T1a4; Asia_W; 38; A73G; T152C; A263G                | 16570 | Asia_W               | T1a4       | T           | T            | 38             |
| 239 | JQ702041.1           | JQ702041.1; I3a; Asia_W_SW; 37; A73G; T152C; T199C              | 16574 | Asia_W_SW            | I3a        | I           | I            | 37             |
| 240 | JQ702042.1           | JQ702042.1; J2b1b1; Asia_W; 37; A73G; C150T; T152C              | 16570 | Asia_W               | J2b1b1     | J           | J            | 37             |
| 241 | JQ702043.1           | JQ702043.1; H1n4; Asia_W_Europe; 16; T146C; A263G; C309CCCT     | 16571 | Asia_W_Europe        | H1n4       | H           | H            | 16             |
| 242 | JQ702044.1           | JQ702044.1; H11a1; Asia_W_Europe; 17; T146C; T195C; A263G       | 16569 | Asia_W_Europe        | H11a1      | H           | H            | 17             |
| 243 | JQ702045.1           | JQ702045.1; V1a1b; Europe_S; 17; T72C; A263G; C315CC            | 16569 | Europe_S             | V1a1b      | V           | V            | 17             |
| 244 | JQ702046.1           | JQ702046.1; U5b2b3a1; Asia_W_Europe_C; 37; A73G; C150T; A263G   | 16569 | Asia_W_Europe_C      | U5b2b3a1   | U           | U5           | 37             |
| 245 | JQ702047.1           | JQ702047.1; L3k1; Africa_E; 41; A73G; C150T; T152C              | 16569 | Africa_E             | L3k1       | L3          | L3           | 41             |
| 246 | JQ702048.1           | JQ702048.1; HV11; Asia_W; 16; T146C; C150T; A263G               | 16570 | Asia_W               | HV11       | HV          | HV           | 16             |

**Supplementary Table S3** Human mitochondrial database (hMITO DB v1.0) metadata

| Row | Name (accession no.) | Description                                                            | Size  | Geo_Region            | Haplogroup   | Macro_Haplo | Macro_Haplo2 | Total Variants |
|-----|----------------------|------------------------------------------------------------------------|-------|-----------------------|--------------|-------------|--------------|----------------|
| 247 | JQ702049.1           | JQ702049.1; J1c8a1; Asia_W; 32; A73G; G185A; G228A                     | 16574 | Asia_W                | J1c8a1       | J           | J            | 32             |
| 248 | JQ702050.1           | JQ702050.1; W1+119; Asia_W; 36; A73G; T119C; A189G                     | 16569 | Asia_W                | W1+119       | W           | W            | 36             |
| 249 | JQ702051.1           | JQ702051.1; H11a2; Asia_W_Europe; 20; T146C; T195C; A263G              | 16569 | Asia_W_Europe         | H11a2        | H           | H            | 20             |
| 250 | JQ702052.1           | JQ702052.1; H47a; Asia_W_Europe; 14; T152C; A263G; C315CC              | 16567 | Asia_W_Europe         | H47a         | H           | H            | 14             |
| 251 | JQ702053.1           | JQ702053.1; U5a1a2b1; Asia_W_Europe_C; 33; A73G; A263G; C309CCT        | 16570 | Asia_W_Europe_C       | U5a1a2b1     | U           | U5           | 33             |
| 252 | JQ702054.1           | JQ702054.1; U5b1+16189+@16192; Asia_W_Europe_C; 30; A73G; C150T; A263G | 16570 | Asia_W_Europe_C       | U5b1+16189+@ | U           | U5           | 30             |
| 253 | JQ702055.1           | JQ702055.1; H3b+16129; Asia_W_Europe; 13; A263G; C309CCCT; T310C       | 16571 | Asia_W_Europe         | H3b+16129    | H           | H            | 13             |
| 254 | JQ702056.1           | JQ702056.1; H7b2; Asia_W_Europe; 11; A263G; C315CC; A750G              | 16569 | Asia_W_Europe         | H7b2         | H           | H            | 11             |
| 255 | JQ702057.1           | JQ702057.1; H1aa1; Asia_W_Europe; 12; A263G; C315CC; A750G             | 16569 | Asia_W_Europe         | H1aa1        | H           | H            | 12             |
| 256 | JQ702058.1           | JQ702058.1; T2b4+152; Asia_W; 38; A73G; T152C; A263G                   | 16570 | Asia_W                | T2b4+152     | T           | T            | 38             |
| 257 | JQ702059.1           | JQ702059.1; H2a1a; Asia_W_Europe; 14; G94A; T152C; A263G               | 16568 | Asia_W_Europe         | H2a1a        | H           | H            | 14             |
| 258 | JQ702060.1           | JQ702060.1; H41a; Asia_W_Europe; 14; C262T; A263G; C309CCT             | 16570 | Asia_W_Europe         | H41a         | H           | H            | 14             |
| 259 | JQ702061.1           | JQ702061.1; W5a1a; Asia_W; 42; A73G; T152C; A189G                      | 16570 | Asia_W                | W5a1a        | W           | W            | 42             |
| 260 | JQ702062.1           | JQ702062.1; I3a; Asia_W_SW; 39; A73G; T152C; A189G                     | 16576 | Asia_W_SW             | I3a          | I           | I            | 39             |
| 261 | JQ702063.1           | JQ702063.1; J1c3+189; Asia_W; 30; A73G; G185A; A189G                   | 16570 | Asia_W                | J1c3+189     | J           | J            | 30             |
| 262 | JQ702064.1           | JQ702064.1; B5a1b1; Asia_SE_E_America_N_S; 35; A73G; A210G; A263G      | 16560 | Asia_SE_E_America_N_S | B5a1b1       | B           | B            | 35             |
| 263 | JQ702065.1           | JQ702065.1; X2b+226; Asia_W_America_N; 33; A73G; T195C; G225A          | 16570 | Asia_W_America_N      | X2b+226      | X           | X            | 33             |
| 264 | JQ702066.1           | JQ702066.1; K1a9; Asia_W; 33; A73G; T195C; A263G                       | 16569 | Asia_W                | K1a9         | K           | K            | 33             |
| 265 | JQ702067.1           | JQ702067.1; H; Asia_W_Europe; 11; A73G; G207A; A263G                   | 16570 | Asia_W_Europe         | H            | H           | H            | 11             |
| 266 | JQ702068.1           | JQ702068.1; J1c8a1a; Asia_W; 35; A73G; G185A; G228A                    | 16570 | Asia_W                | J1c8a1a      | J           | J            | 35             |
| 267 | JQ702069.1           | JQ702069.1; M7a1a9; Asia_E_SE; 45; A73G; T146C; A263G                  | 16568 | Asia_E_SE             | M7a1a9       | M           | M7           | 45             |
| 268 | JQ702070.1           | JQ702070.1; K1a+195; Asia_W; 35; A73G; T195C; A263G                    | 16573 | Asia_W                | K1a+195      | K           | K            | 35             |
| 269 | JQ702071.1           | JQ702071.1; H1ae1; Asia_W_Europe; 11; A263G; C315CC; A750G             | 16569 | Asia_W_Europe         | H1ae1        | H           | H            | 11             |
| 270 | JQ702072.1           | JQ702072.1; U5a2a1; Asia_W_Europe_C; 28; A73G; A263G; C309CCT          | 16570 | Asia_W_Europe_C       | U5a2a1       | U           | U5           | 28             |
| 271 | JQ702073.1           | JQ702073.1; H56; Asia_W_Europe; 9; A263G; C315CC; A750G                | 16569 | Asia_W_Europe         | H56          | H           | H            | 9              |
| 272 | JQ702074.1           | JQ702074.1; F1a3a; Asia_SE_E; 37; A73G; A249d; A263G                   | 16566 | Asia_SE_E             | F1a3a        | F           | F            | 37             |
| 273 | JQ702075.1           | JQ702075.1; K2b1a4; Asia_W; 38; A73G; A93G; T146C                      | 16569 | Asia_W                | K2b1a4       | K           | K            | 38             |
| 274 | JQ702076.1           | JQ702076.1; K1a4d; Asia_W; 35; A73G; A263G; C315CC                     | 16571 | Asia_W                | K1a4d        | K           | K            | 35             |
| 275 | JQ702077.1           | JQ702077.1; H1n1b; Asia_W_Europe; 17; T146C; A263G; C309CCT            | 16574 | Asia_W_Europe         | H1n1b        | H           | H            | 17             |
| 276 | JQ702078.1           | JQ702078.1; U5a1a1; Asia_W_Europe_C; 30; A73G; G207A; A263G            | 16570 | Asia_W_Europe_C       | U5a1a1       | U           | U5           | 30             |
| 277 | JQ702079.1           | JQ702079.1; C1b11; Asia_NE_America_N_S; 48; T72C; A73G; C194T          | 16565 | Asia_NE_America_N_S   | C1b11        | C           | C            | 48             |
| 278 | JQ702080.1           | JQ702080.1; H82; Asia_W_Europe; 11; T195C; A263G; C315CC               | 16567 | Asia_W_Europe         | H82          | H           | H            | 11             |
| 279 | JQ702081.1           | JQ702081.1; J1c1b2; Asia_W; 35; A73G; G228A; A263G                     | 16567 | Asia_W                | J1c1b2       | J           | J            | 35             |
| 280 | JQ702082.1           | JQ702082.1; A2; Asia_NE_America_N; 32; A73G; T146C; A153G              | 16569 | Asia_NE_America_N     | A2           | A           | A            | 32             |
| 281 | JQ702083.1           | JQ702083.1; H5a4a1a; Asia_W_Europe; 18; A263G; T282C; C315CC           | 16569 | Asia_W_Europe         | H5a4a1a      | H           | H            | 18             |
| 282 | JQ702084.1           | JQ702084.1; T2b13a; Asia_W; 38; A73G; A263G; C309CCT                   | 16570 | Asia_W                | T2b13a       | T           | T            | 38             |
| 283 | JQ702085.1           | JQ702085.1; U5a1a1a; Asia_W_Europe_C; 31; A73G; T152C; A263G           | 16570 | Asia_W_Europe_C       | U5a1a1a      | U           | U5           | 31             |
| 284 | JQ702086.1           | JQ702086.1; K1a1c; Asia_W; 36; A73G; C114T; A263G                      | 16569 | Asia_W                | K1a1c        | K           | K            | 36             |
| 285 | JQ702087.1           | JQ702087.1; H3+152; Asia_W_Europe; 10; T152C; A263G; C315CC            | 16569 | Asia_W_Europe         | H3+152       | H           | H            | 10             |
| 286 | JQ702088.1           | JQ702088.1; J1c12b; Asia_W; 35; A73G; G185A; A189G                     | 16572 | Asia_W                | J1c12b       | J           | J            | 35             |
| 287 | JQ702089.1           | JQ702089.1; H1c2; Asia_W_Europe; 14; T195C; A263G; C315CC              | 16569 | Asia_W_Europe         | H1c2         | H           | H            | 14             |

**Supplementary Table S3** Human mitochondrial database (hMITO DB v1.0) metadata

| Row | Name (accession no.) | Description                                                    | Size  | Geo_Region        | Haplogroup     | Macro_Haplo | Macro_Haplo2 | Total Variants |
|-----|----------------------|----------------------------------------------------------------|-------|-------------------|----------------|-------------|--------------|----------------|
| 288 | JQ702090.1           | JQ702090.1; H6a1b2; Asia_W_Europe; 17; T239C; A263G; C309CCT   | 16570 | Asia_W_Europe     | H6a1b2         | H           | H            | 17             |
| 289 | JQ702091.1           | JQ702091.1; J2a1a1c; Asia_W; 41; A73G; C150T; T152C            | 16570 | Asia_W            | J2a1a1c        | J           | J            | 41             |
| 290 | JQ702092.1           | JQ702092.1; H3m; Asia_W_Europe; 11; A263G; C315CC; A750G       | 16569 | Asia_W_Europe     | H3m            | H           | H            | 11             |
| 291 | JQ702093.1           | JQ702093.1; A2v1+152; Asia_NE_America_N; 38; C64T; A73G; T146C | 16569 | Asia_NE_America_N | A2v1+152       | A           | A            | 38             |
| 292 | JQ702094.1           | JQ702094.1; U4a2a1; Asia_N_Europe_N; 29; A73G; T195C; A263G    | 16570 | Asia_N_Europe_N   | U4a2a1         | U           | U4           | 29             |
| 293 | JQ702095.1           | JQ702095.1; H3ap; Asia_W_Europe; 15; T146C; A263G; C309CCT     | 16570 | Asia_W_Europe     | H3ap           | H           | H            | 15             |
| 294 | JQ702096.1           | JQ702096.1; X2b9; Asia_W_America_N; 32; A73G; A153G; T195C     | 16570 | Asia_W_America_N  | X2b9           | X           | X            | 32             |
| 295 | JQ702097.1           | JQ702097.1; J1c3e1; Asia_W; 35; A73G; G185A; G228A             | 16569 | Asia_W            | J1c3e1         | J           | J            | 35             |
| 296 | JQ702098.1           | JQ702098.1; W5a1a; Asia_W; 39; A73G; A189G; C194T              | 16570 | Asia_W            | W5a1a          | W           | W            | 39             |
| 297 | JQ702099.1           | JQ702099.1; H1c1b; Asia_W_Europe; 16; A263G; C309CCT; T310C    | 16570 | Asia_W_Europe     | H1c1b          | H           | H            | 16             |
| 298 | JQ702100.1           | JQ702100.1; K1a9; Asia_W; 32; A73G; T195C; A263G               | 16569 | Asia_W            | K1a9           | K           | K            | 32             |
| 299 | JQ702101.1           | JQ702101.1; H1a3a; Asia_W_Europe; 15; A73G; A263G; C309CCT     | 16570 | Asia_W_Europe     | H1a3a          | H           | H            | 15             |
| 300 | JQ702102.1           | JQ702102.1; H1; Asia_W_Europe; 10; A263G; C315CC; A750G        | 16569 | Asia_W_Europe     | H1             | H           | H            | 10             |
| 301 | JQ702103.1           | JQ702103.1; H16c; Asia_W_Europe; 14; T152C; T195C; A263G       | 16571 | Asia_W_Europe     | H16c           | H           | H            | 14             |
| 302 | JQ702104.1           | JQ702104.1; H1e1b1b; Asia_W_Europe; 17; T152C; A263G; C315CC   | 16569 | Asia_W_Europe     | H1e1b1b        | H           | H            | 17             |
| 303 | JQ702105.1           | JQ702105.1; H1ae3a; Asia_W_Europe; 15; A263G; C309CCT; T310C   | 16570 | Asia_W_Europe     | H1ae3a         | H           | H            | 15             |
| 304 | JQ702106.1           | JQ702106.1; U2e1a1; Asia_S_W_Europe; 42; A73G; T152C; T217C    | 16572 | Asia_S_W_Europe   | U2e1a1         | U           | U2           | 42             |
| 305 | JQ702107.1           | JQ702107.1; H6a1a2a; Asia_W_Europe; 17; C41T; T239C; A263G     | 16569 | Asia_W_Europe     | H6a1a2a        | H           | H            | 17             |
| 306 | JQ702108.1           | JQ702108.1; T2g2a; Asia_W; 40; A73G; T195C; A263G              | 16570 | Asia_W            | T2g2a          | T           | T            | 40             |
| 307 | JQ702109.1           | JQ702109.1; I3a; Asia_W_SW; 38; A73G; T152C; T199C             | 16582 | Asia_W_SW         | I3a            | I           | I            | 38             |
| 308 | JQ702110.1           | JQ702110.1; J1c2; Asia_W; 32; A73G; G185A; A188G               | 16570 | Asia_W            | J1c2           | J           | J            | 32             |
| 309 | JQ702111.1           | JQ702111.1; K2a; Asia_W; 31; A73G; T146C; T152C                | 16569 | Asia_W            | K2a            | K           | K            | 31             |
| 310 | JQ702112.1           | JQ702112.1; H13a1a; Asia_W_Europe; 14; A263G; C309CCT; T310C   | 16570 | Asia_W_Europe     | H13a1a         | H           | H            | 14             |
| 311 | JQ702113.1           | JQ702113.1; H1c1; Asia_W_Europe; 14; A263G; C315CC; T477C      | 16569 | Asia_W_Europe     | H1c1           | H           | H            | 14             |
| 312 | JQ702114.1           | JQ702114.1; H1b1; Asia_W_Europe; 15; A263G; C309CCCT; T310C    | 16571 | Asia_W_Europe     | H1b1           | H           | H            | 15             |
| 313 | JQ702115.1           | JQ702115.1; L2c4; Africa_W_C; 64; A73G; T89C; A93G             | 16567 | Africa_W_C        | L2c4           | L2          | L2           | 64             |
| 314 | JQ702116.1           | JQ702116.1; HV0d; Asia_W; 17; T72C; T195C; A263G               | 16570 | Asia_W            | HV0d           | HV          | HV           | 17             |
| 315 | JQ702117.1           | JQ702117.1; K1a9; Asia_W; 32; A73G; T195C; A263G               | 16569 | Asia_W            | K1a9           | K           | K            | 32             |
| 316 | JQ702118.1           | JQ702118.1; U6a7c; Asia_W_Europe_C; 36; A73G; C151T; T152C     | 16570 | Asia_W_Europe_C   | U6a7c          | U           | U6           | 36             |
| 317 | JQ702119.1           | JQ702119.1; H17a; Asia_W_Europe; 14; A263G; C309CCCT; T310C    | 16571 | Asia_W_Europe     | H17a           | H           | H            | 14             |
| 318 | JQ702120.1           | JQ702120.1; H3u1; Asia_W_Europe; 14; A263G; C315CC; A750G      | 16570 | Asia_W_Europe     | H3u1           | H           | H            | 14             |
| 319 | JQ702121.1           | JQ702121.1; H8c; Asia_W_Europe; 22; A93G; C114T; T146C         | 16571 | Asia_W_Europe     | H8c            | H           | H            | 22             |
| 320 | JQ702122.1           | JQ702122.1; U5a1a1h; Asia_W_Europe_C; 29; A73G; T152C; T195C   | 16569 | Asia_W_Europe_C   | U5a1a1h        | U           | U5           | 29             |
| 321 | JQ702123.1           | JQ702123.1; L2b3a; Africa_W_C; 70; A73G; T146C; C150T          | 16570 | Africa_W_C        | L2b3a          | L2          | L2           | 70             |
| 322 | JQ702124.1           | JQ702124.1; H3i; Asia_W_Europe; 12; T152C; A263G; C315CC       | 16569 | Asia_W_Europe     | H3i            | H           | H            | 12             |
| 323 | JQ702125.1           | JQ702125.1; U4a1e; Asia_W_Europe_C; 35; A73G; T152C; T195C     | 16571 | Asia_W_Europe_C   | U4a1e          | U           | U4           | 35             |
| 324 | JQ702126.1           | JQ702126.1; M7b1a1+(16192); Asia_E_SE; 48; A73G; T146C; C150T  | 16570 | Asia_E_SE         | M7b1a1+(16192) | M           | M7           | 48             |
| 325 | JQ702127.1           | JQ702127.1; H3ac; Asia_W_Europe; 10; A263G; C315CC; A750G      | 16569 | Asia_W_Europe     | H3ac           | H           | H            | 10             |
| 326 | JQ702128.1           | JQ702128.1; H5a1g1a; Asia_W_Europe; 20; A263G; C315CC; A444G   | 16567 | Asia_W_Europe     | H5a1g1a        | H           | H            | 20             |
| 327 | JQ702129.1           | JQ702129.1; K1c2; Asia_W; 36; A73G; T146C; T152C               | 16568 | Asia_W            | K1c2           | K           | K            | 36             |
| 328 | JQ702130.1           | JQ702130.1; H1e1a; Asia_W_Europe; 13; A263G; C315CC; A750G     | 16569 | Asia_W_Europe     | H1e1a          | H           | H            | 13             |



**Supplementary Table S3** Human mitochondrial database (hMITO DB v1.0) metadata

| Row | Name (accession no.) | Description                                                   | Size  | Geo_Region         | Haplogroup | Macro_Haplo | Macro_Haplo2 | Total Variants |
|-----|----------------------|---------------------------------------------------------------|-------|--------------------|------------|-------------|--------------|----------------|
| 329 | JQ702131.1           | JQ702131.1; K2b1a1a; Asia_W; 37; A73G; T146C; T152C           | 16569 | Asia_W             | K2b1a1a    | K           | K            | 37             |
| 330 | JQ702132.1           | JQ702132.1; H1+152; Asia_W_Europe; 13; T152C; A263G; C309CCT  | 16570 | Asia_W_Europe      | H1+152     | H           | H            | 13             |
| 331 | JQ702133.1           | JQ702133.1; K1c1; Asia_W; 34; A73G; T146C; T152C              | 16570 | Asia_W             | K1c1       | K           | K            | 34             |
| 332 | JQ702134.1           | JQ702134.1; K2a10; Asia_W; 34; A73G; T146C; T152C             | 16570 | Asia_W             | K2a10      | K           | K            | 34             |
| 333 | JQ702135.1           | JQ702135.1; H3h7; Asia_W_Europe; 13; A93G; A263G; C315CC      | 16569 | Asia_W_Europe      | H3h7       | H           | H            | 13             |
| 334 | JQ702136.1           | JQ702136.1; U5b2b3b; Asia_W_Europe_C; 35; A73G; C150T; A263G  | 16570 | Asia_W_Europe_C    | U5b2b3b    | U           | U5           | 35             |
| 335 | JQ702137.1           | JQ702137.1; D1f2; Asia_E_America_N_S; 40; A73G; T152C; A263G  | 16570 | Asia_E_America_N_S | D1f2       | D           | D            | 40             |
| 336 | JQ702138.1           | JQ702138.1; H+152; Asia_W_Europe; 13; A73G; T146C; T152C      | 16567 | Asia_W_Europe      | H+152      | H           | H            | 13             |
| 337 | JQ702139.1           | JQ702139.1; T1a6; Asia_W; 37; A73G; A263G; C309CCCT           | 16570 | Asia_W             | T1a6       | T           | T            | 37             |
| 338 | JQ702140.1           | JQ702140.1; H1h1; Asia_W_Europe; 18; T146C; T152C; A234G      | 16571 | Asia_W_Europe      | H1h1       | H           | H            | 18             |
| 339 | JQ702141.1           | JQ702141.1; U8a2; Asia_W_Europe; 29; A73G; A263G; T282C       | 16570 | Asia_W_Europe      | U8a2       | U           | U8           | 29             |
| 340 | JQ702142.1           | JQ702142.1; A2q; Asia_NE_America_N; 34; C64T; A73G; T146C     | 16568 | Asia_NE_America_N  | A2q        | A           | A            | 34             |
| 341 | JQ702143.1           | JQ702143.1; HV5a; Asia_W; 11; A263G; C315CC; A750G            | 16569 | Asia_W             | HV5a       | HV          | HV           | 11             |
| 342 | JQ702144.1           | JQ702144.1; U5a2d; Asia_W_Europe_C; 36; A73G; A200G; A263G    | 16571 | Asia_W_Europe_C    | U5a2d      | U           | U5           | 36             |
| 343 | JQ702145.1           | JQ702145.1; V9a2; Europe_S; 22; T72C; T204C; G207A            | 16570 | Europe_S           | V9a2       | V           | V            | 22             |
| 344 | JQ702146.1           | JQ702146.1; U5b3b1; Asia_W_Europe_C; 29; A73G; C150T; A189G   | 16569 | Asia_W_Europe_C    | U5b3b1     | U           | U5           | 29             |
| 345 | JQ702147.1           | JQ702147.1; W7; Asia_W; 36; A73G; T119C; G185A                | 16570 | Asia_W             | W7         | W           | W            | 36             |
| 346 | JQ702148.1           | JQ702148.1; K1c1; Asia_W; 35; A73G; T146C; T152C              | 16568 | Asia_W             | K1c1       | K           | K            | 35             |
| 347 | JQ702149.1           | JQ702149.1; HV0a1a; Asia_W; 21; T72C; A200G; A263G            | 16568 | Asia_W             | HV0a1a     | HV          | HV           | 21             |
| 348 | JQ702150.1           | JQ702150.1; U3b2; Africa_NE_Asia_W; 32; A73G; C150T; T208C    | 16567 | Africa_NE_Asia_W   | U3b2       | U           | U3           | 32             |
| 349 | JQ702151.1           | JQ702151.1; H5a2; Asia_W_Europe; 13; A263G; C309CCT; T310C    | 16570 | Asia_W_Europe      | H5a2       | H           | H            | 13             |
| 350 | JQ702152.1           | JQ702152.1; U5b1b2; Asia_W_Europe_C; 29; A73G; C150T; T217C   | 16570 | Asia_W_Europe_C    | U5b1b2     | U           | U5           | 29             |
| 351 | JQ702153.1           | JQ702153.1; D5c1a; Asia_E_America_N_S; 44; A73G; T146C; C150T | 16571 | Asia_E_America_N_S | D5c1a      | D           | D            | 44             |
| 352 | JQ702154.1           | JQ702154.1; U4d1a1; Asia_W_Europe_C; 34; A73G; T195C; A263G   | 16573 | Asia_W_Europe_C    | U4d1a1     | U           | U4           | 34             |
| 353 | JQ702155.1           | JQ702155.1; K1a1b1a; Asia_W; 37; A73G; A263G; C315CC          | 16571 | Asia_W             | K1a1b1a    | K           | K            | 37             |
| 354 | JQ702156.1           | JQ702156.1; H5+16192; Asia_W_Europe; 16; A263G; C315CC; C456T | 16569 | Asia_W_Europe      | H5+16192   | H           | H            | 16             |
| 355 | JQ702157.1           | JQ702157.1; H14a2; Asia_W_Europe; 21; A95C; T152C; A263G      | 16570 | Asia_W_Europe      | H14a2      | H           | H            | 21             |
| 356 | JQ702158.1           | JQ702158.1; T2b4d; Asia_W; 35; A73G; T152C; A263G             | 16569 | Asia_W             | T2b4d      | T           | T            | 35             |
| 357 | JQ702159.1           | JQ702159.1; V15a; Europe_S; 16; T72C; A263G; C309CCCT         | 16571 | Europe_S           | V15a       | V           | V            | 16             |
| 358 | JQ702160.1           | JQ702160.1; U5a1f1; Asia_W_Europe_C; 32; A73G; T195C; A263G   | 16569 | Asia_W_Europe_C    | U5a1f1     | U           | U5           | 32             |
| 359 | JQ702161.1           | JQ702161.1; H1n2; Asia_W_Europe; 19; T146C; T152C; A200G      | 16571 | Asia_W_Europe      | H1n2       | H           | H            | 19             |
| 360 | JQ702162.1           | JQ702162.1; H3a1; Asia_W_Europe; 14; T152C; A263G; C309CCT    | 16570 | Asia_W_Europe      | H3a1       | H           | H            | 14             |
| 361 | JQ702163.1           | JQ702163.1; I2c; Asia_W_SW; 36; A73G; T199C; T204C            | 16571 | Asia_W_SW          | I2c        | I           | I            | 36             |
| 362 | JQ702164.1           | JQ702164.1; G1b+16129; Asia_E; 38; A73G; G207A; A263G         | 16569 | Asia_E             | G1b+16129  | G           | G            | 38             |
| 363 | JQ702165.1           | JQ702165.1; U5a2c1; Asia_W_Europe_C; 28; A73G; A263G; C309CCT | 16568 | Asia_W_Europe_C    | U5a2c1     | U           | U5           | 28             |
| 364 | JQ702166.1           | JQ702166.1; K1a1a; Asia_W; 32; A73G; C114T; A263G             | 16569 | Asia_W             | K1a1a      | K           | K            | 32             |
| 365 | JQ702167.1           | JQ702167.1; U5b2a2a2; Asia_W_Europe_C; 34; A73G; C150T; A263G | 16569 | Asia_W_Europe_C    | U5b2a2a2   | U           | U5           | 34             |
| 366 | JQ702168.1           | JQ702168.1; K1b1a1a; Asia_W; 41; A73G; T152C; T199C           | 16569 | Asia_W             | K1b1a1a    | K           | K            | 41             |
| 367 | JQ702169.1           | JQ702169.1; L2c; Africa_W_C; 59; A73G; A93G; C150T            | 16568 | Africa_W_C         | L2c        | L2          | L2           | 59             |
| 368 | JQ702170.1           | JQ702170.1; T2h2; Asia_W; 37; A73G; A263G; C315CC             | 16569 | Asia_W             | T2h2       | T           | T            | 37             |
| 369 | JQ702171.1           | JQ702171.1; H2a5b; Asia_W_Europe; 11; A263G; C309CCT; T310C   | 16570 | Asia_W_Europe      | H2a5b      | H           | H            | 11             |

**Supplementary Table S3** Human mitochondrial database (hMITO DB v1.0) metadata

| Row | Name (accession no.) | Description                                                        | Size  | Geo_Region          | Haplogroup   | Macro_Haplo | Macro_Haplo2 | Total Variants |
|-----|----------------------|--------------------------------------------------------------------|-------|---------------------|--------------|-------------|--------------|----------------|
| 370 | JQ702172.1           | JQ702172.1; A2k1a; Asia_NE_America_N; 35; C64T; A73G; T146C        | 16568 | Asia_NE_America_N   | A2k1a        | A           | A            | 35             |
| 371 | JQ702173.1           | JQ702173.1; T1a1q; Asia_W; 37; A73G; T152C; T195C                  | 16570 | Asia_W              | T1a1q        | T           | T            | 37             |
| 372 | JQ702174.1           | JQ702174.1; H1a3; Asia_W_Europe; 13; A73G; A263G; C315CC           | 16569 | Asia_W_Europe       | H1a3         | H           | H            | 13             |
| 373 | JQ702175.1           | JQ702175.1; K1a4a1a; Asia_W; 40; A73G; T131C; A263G                | 16573 | Asia_W              | K1a4a1a      | K           | K            | 40             |
| 374 | JQ702176.1           | JQ702176.1; J1c14; Asia_W; 36; A73G; G185A; T195C                  | 16572 | Asia_W              | J1c14        | J           | J            | 36             |
| 375 | JQ702177.1           | JQ702177.1; A2ao1; Asia_NE_America_N; 37; C64T; A73G; T146C        | 16568 | Asia_NE_America_N   | A2ao1        | A           | A            | 37             |
| 376 | JQ702178.1           | JQ702178.1; H1ba; Asia_W_Europe; 11; A263G; C315CC; T482C          | 16569 | Asia_W_Europe       | H1ba         | H           | H            | 11             |
| 377 | JQ702179.1           | JQ702179.1; L3e3b; Africa_E; 41; A73G; C150T; A189G                | 16567 | Africa_E            | L3e3b        | L3          | L3           | 41             |
| 378 | JQ702180.1           | JQ702180.1; H4a1a4b; Asia_W_Europe; 22; T195C; A263G; C309CCCT     | 16569 | Asia_W_Europe       | H4a1a4b      | H           | H            | 22             |
| 379 | JQ702181.1           | JQ702181.1; R0a2a1; Africa_NE_Asia_W; 22; T57TC; C64T; A263G       | 16570 | Africa_NE_Asia_W    | R0a2a1       | R           | R0           | 22             |
| 380 | JQ702182.1           | JQ702182.1; H1a3; Asia_W_Europe; 14; A73G; A263G; C315CC           | 16569 | Asia_W_Europe       | H1a3         | H           | H            | 14             |
| 381 | JQ702183.1           | JQ702183.1; H3m; Asia_W_Europe; 12; A263G; C315CC; A750G           | 16569 | Asia_W_Europe       | H3m          | H           | H            | 12             |
| 382 | JQ702184.1           | JQ702184.1; U5a2b2a; Asia_W_Europe_C; 31; A73G; C182T; A263G       | 16570 | Asia_W_Europe_C     | U5a2b2a      | U           | U5           | 31             |
| 383 | JQ702185.1           | JQ702185.1; C1b; Asia_NE_America_N_S; 47; A73G; G143A; T195C       | 16564 | Asia_NE_America_N_S | C1b          | C           | C            | 47             |
| 384 | JQ702186.1           | JQ702186.1; H1c1; Asia_W_Europe; 14; A263G; C315CC; T477C          | 16569 | Asia_W_Europe       | H1c1         | H           | H            | 14             |
| 385 | JQ702187.1           | JQ702187.1; H1a1; Asia_W_Europe; 15; A73G; A263G; C315CC           | 16569 | Asia_W_Europe       | H1a1         | H           | H            | 15             |
| 386 | JQ702188.1           | JQ702188.1; T2b+152; Asia_W; 35; A73G; T152C; A263G                | 16569 | Asia_W              | T2b+152      | T           | T            | 35             |
| 387 | JQ702189.1           | JQ702189.1; H6a1a6; Asia_W_Europe; 18; T239C; A263G; A288G         | 16570 | Asia_W_Europe       | H6a1a6       | H           | H            | 18             |
| 388 | JQ702190.1           | JQ702190.1; U5b2a1a2; Asia_W_Europe_C; 32; A73G; C150T; A263G      | 16572 | Asia_W_Europe_C     | U5b2a1a2     | U           | U5           | 32             |
| 389 | JQ702191.1           | JQ702191.1; I2; Asia_W_SW; 38; A73G; T152C; T199C                  | 16571 | Asia_W_SW           | I2           | I           | I            | 38             |
| 390 | JQ702192.1           | JQ702192.1; K1a9; Asia_W; 33; A73G; T195C; A263G                   | 16569 | Asia_W              | K1a9         | K           | K            | 33             |
| 391 | JQ702193.1           | JQ702193.1; K1a13; Asia_W; 39; A73G; T146C; T152C                  | 16572 | Asia_W              | K1a13        | K           | K            | 39             |
| 392 | JQ702194.1           | JQ702194.1; HV0d; Asia_W; 17; T72C; T195C; A263G                   | 16571 | Asia_W              | HV0d         | HV          | HV           | 17             |
| 393 | JQ702195.1           | JQ702195.1; U5a1b1a; Asia_W_Europe_C; 29; A73G; A263G; C315CC      | 16569 | Asia_W_Europe_C     | U5a1b1a      | U           | U5           | 29             |
| 394 | JQ702196.1           | JQ702196.1; J2b1a; Asia_W; 32; A73G; C150T; T152C                  | 16569 | Asia_W              | J2b1a        | J           | J            | 32             |
| 395 | JQ702197.1           | JQ702197.1; N9a2a; Africa_NE_Asia_E; 27; A73G; C150T; A263G        | 16571 | Africa_NE_Asia_E    | N9a2a        | N           | N9           | 27             |
| 396 | JQ702198.1           | JQ702198.1; H1a1b; Asia_W_Europe; 15; A73G; A263G; C315CC          | 16569 | Asia_W_Europe       | H1a1b        | H           | H            | 15             |
| 397 | JQ702199.1           | JQ702199.1; J2b1a; Asia_W; 38; A73G; C150T; T152C                  | 16569 | Asia_W              | J2b1a        | J           | J            | 38             |
| 398 | JQ702200.1           | JQ702200.1; A2+(64)+@153; Asia_NE_America_N; 34; C64T; A73G; A111C | 16568 | Asia_NE_America_N   | A2+(64)+@153 | A           | A            | 34             |
| 399 | JQ702201.1           | JQ702201.1; J1c5d; Asia_W; 34; A73G; G185A; A188G                  | 16568 | Asia_W              | J1c5d        | J           | J            | 34             |
| 400 | JQ702202.1           | JQ702202.1; H26a1; Asia_W_Europe; 14; T152C; A263G; C315CC         | 16570 | Asia_W_Europe       | H26a1        | H           | H            | 14             |
| 401 | JQ702203.1           | JQ702203.1; U8a1a1b1; Asia_W_Europe ; 32; A73G; A263G; T282C       | 16570 | Asia_W_Europe       | U8a1a1b1     | U           | U8           | 32             |
| 402 | JQ702204.1           | JQ702204.1; H1c; Asia_W_Europe; 11; T146C; A263G; C315CC           | 16569 | Asia_W_Europe       | H1c          | H           | H            | 11             |
| 403 | JQ702205.1           | JQ702205.1; H2a5b1; Asia_W_Europe; 11; A249d; A263G; C309CCT       | 16569 | Asia_W_Europe       | H2a5b1       | H           | H            | 11             |
| 404 | JQ702206.1           | JQ702206.1; V14; Europe_S; 15; T72C; A263G; C309CCT                | 16570 | Europe_S            | V14          | V           | V            | 15             |
| 405 | JQ702207.1           | JQ702207.1; D4a1f1; Asia_E_America_N_S; 41; A73G; T152C; A263G     | 16570 | Asia_E_America_N_S  | D4a1f1       | D           | D            | 41             |
| 406 | JQ702208.1           | JQ702208.1; J1c12b; Asia_W; 35; A73G; G185A; A189G                 | 16574 | Asia_W              | J1c12b       | J           | J            | 35             |
| 407 | JQ702209.1           | JQ702209.1; U5b2b4a; Asia_W_Europe_C; 35; A73G; C150T; T152C       | 16570 | Asia_W_Europe_C     | U5b2b4a      | U           | U5           | 35             |
| 408 | JQ702210.1           | JQ702210.1; T2e+152; Asia_W; 39; A73G; C150T; T152C                | 16570 | Asia_W              | T2e+152      | T           | T            | 39             |
| 409 | JQ702211.1           | JQ702211.1; U4b; Asia_W_Europe_C; 29; A73G; T195C; A263G           | 16571 | Asia_W_Europe_C     | U4b          | U           | U4           | 29             |
| 410 | JQ702212.1           | JQ702212.1; H6a1a; Asia_W_Europe; 18; T239C; A263G; C309CCCT       | 16571 | Asia_W_Europe       | H6a1a        | H           | H            | 18             |

**Supplementary Table S3** Human mitochondrial database (hMITO DB v1.0) metadata

| Row | Name (accession no.) | Description                                                    | Size  | Geo_Region        | Haplogroup  | Macro_Haplo | Macro_Haplo2 | Total Variants |
|-----|----------------------|----------------------------------------------------------------|-------|-------------------|-------------|-------------|--------------|----------------|
| 411 | JQ702213.1           | JQ702213.1; K1a4a1a+195; Asia_W; 36; A73G; T195C; A263G        | 16569 | Asia_W            | K1a4a1a+195 | K           | K            | 36             |
| 412 | JQ702214.1           | JQ702214.1; H6a1a; Asia_W_Europe; 16; T239C; A263G; C315CC     | 16571 | Asia_W_Europe     | H6a1a       | H           | H            | 16             |
| 413 | JQ702215.1           | JQ702215.1; H1c+152; Asia_W_Europe; 13; T152C; A263G; C309CCCT | 16571 | Asia_W_Europe     | H1c+152     | H           | H            | 13             |
| 414 | JQ702216.1           | JQ702216.1; J2a1a1; Asia_W; 38; A73G; C150T; T152C             | 16570 | Asia_W            | J2a1a1      | J           | J            | 38             |
| 415 | JQ702217.1           | JQ702217.1; H26; Asia_W_Europe; 11; A263G; C309CCCT; T310C     | 16571 | Asia_W_Europe     | H26         | H           | H            | 11             |
| 416 | JQ702218.1           | JQ702218.1; H79; Asia_W_Europe; 12; A263G; C309CCCT; T310C     | 16571 | Asia_W_Europe     | H79         | H           | H            | 12             |
| 417 | JQ702219.1           | JQ702219.1; J1c2; Asia_W; 31; A73G; G185A; A188G               | 16570 | Asia_W            | J1c2        | J           | J            | 31             |
| 418 | JQ702220.1           | JQ702220.1; H3t; Asia_W_Europe; 12; A263G; C315CC; A750G       | 16569 | Asia_W_Europe     | H3t         | H           | H            | 12             |
| 419 | JQ702221.1           | JQ702221.1; H1c; Asia_W_Europe; 13; A263G; C315CC; T477C       | 16567 | Asia_W_Europe     | H1c         | H           | H            | 13             |
| 420 | JQ702222.1           | JQ702222.1; HV0d; Asia_W; 17; C64T; T72C; T195C                | 16570 | Asia_W            | HV0d        | HV          | HV           | 17             |
| 421 | JQ702223.1           | JQ702223.1; H1i2a; Asia_W_Europe; 14; T152C; A263G; C315CC     | 16569 | Asia_W_Europe     | H1i2a       | H           | H            | 14             |
| 422 | JQ702224.1           | JQ702224.1; J1c1b; Asia_W; 32; A73G; G185A; A263G              | 16569 | Asia_W            | J1c1b       | J           | J            | 32             |
| 423 | JQ702225.1           | JQ702225.1; U5a1f1a1; Asia_W_Europe_C; 37; A73G; A189G; T199C  | 16574 | Asia_W_Europe_C   | U5a1f1a1    | U           | U5           | 37             |
| 424 | JQ702226.1           | JQ702226.1; H1a1; Asia_W_Europe; 13; A73G; A263G; C315CC       | 16569 | Asia_W_Europe     | H1a1        | H           | H            | 13             |
| 425 | JQ702227.1           | JQ702227.1; L0a1a2; Africa_S_SE; 82; C64T; A93G; G185A         | 16567 | Africa_S_SE       | L0a1a2      | L0          | L0           | 82             |
| 426 | JQ702228.1           | JQ702228.1; J1c8a; Asia_W; 29; A73G; G185A; G228A              | 16569 | Asia_W            | J1c8a       | J           | J            | 29             |
| 427 | JQ702229.1           | JQ702229.1; H33; Asia_W_Europe; 10; A263G; C315CC; A750G       | 16569 | Asia_W_Europe     | H33         | H           | H            | 10             |
| 428 | JQ702230.1           | JQ702230.1; U5a2b3a1; Asia_W_Europe_C; 34; A73G; T152C; A263G  | 16571 | Asia_W_Europe_C   | U5a2b3a1    | U           | U5           | 34             |
| 429 | JQ702231.1           | JQ702231.1; U5a1e; Asia_W_Europe_C; 27; A73G; A263G; C315CC    | 16569 | Asia_W_Europe_C   | U5a1e       | U           | U5           | 27             |
| 430 | JQ702232.1           | JQ702232.1; M74b2; Asia_S; 42; A73G; A263G; C309CCT            | 16570 | Asia_S            | M74b2       | M           | M74          | 42             |
| 431 | JQ702233.1           | JQ702233.1; H5a1j; Asia_W_Europe; 17; A257G; A263G; C309CCT    | 16568 | Asia_W_Europe     | H5a1j       | H           | H            | 17             |
| 432 | JQ702234.1           | JQ702234.1; H1a3b; Asia_W_Europe; 17; A73G; T195C; A263G       | 16568 | Asia_W_Europe     | H1a3b       | H           | H            | 17             |
| 433 | JQ702235.1           | JQ702235.1; U5b2a1b; Asia_W_Europe_C; 30; A73G; C150T; T152C   | 16569 | Asia_W_Europe_C   | U5b2a1b     | U           | U5           | 30             |
| 434 | JQ702236.1           | JQ702236.1; H1r; Asia_W_Europe; 13; T152C; A263G; C309CCCT     | 16571 | Asia_W_Europe     | H1r         | H           | H            | 13             |
| 435 | JQ702237.1           | JQ702237.1; H1c1b; Asia_W_Europe; 16; A263G; C309CCT; T310C    | 16570 | Asia_W_Europe     | H1c1b       | H           | H            | 16             |
| 436 | JQ702238.1           | JQ702238.1; K1a4a1a2b; Asia_W; 40; A73G; T146C; A263G          | 16572 | Asia_W            | K1a4a1a2b   | K           | K            | 40             |
| 437 | JQ702239.1           | JQ702239.1; T2b; Asia_W; 37; A73G; A237G; A263G                | 16569 | Asia_W            | T2b         | T           | T            | 37             |
| 438 | JQ702240.1           | JQ702240.1; H27a; Asia_W_Europe; 12; A263G; C315CC; A750G      | 16569 | Asia_W_Europe     | H27a        | H           | H            | 12             |
| 439 | JQ702241.1           | JQ702241.1; L3b1a10; Africa_E; 39; A73G; A263G; C315CC         | 16566 | Africa_E          | L3b1a10     | L3          | L3           | 39             |
| 440 | JQ702242.1           | JQ702242.1; H53; Asia_W_Europe; 10; A263G; C315CC; A750G       | 16569 | Asia_W_Europe     | H53         | H           | H            | 10             |
| 441 | JQ702243.1           | JQ702243.1; J1c7a; Asia_W; 35; A73G; G185A; G228A              | 16570 | Asia_W            | J1c7a       | J           | J            | 35             |
| 442 | JQ702244.1           | JQ702244.1; U5a2a1; Asia_W_Europe_C; 29; A73G; C150T; A263G    | 16569 | Asia_W_Europe_C   | U5a2a1      | U           | U5           | 29             |
| 443 | JQ702245.1           | JQ702245.1; K1a1b1a; Asia_W; 37; A73G; C114T; A263G            | 16569 | Asia_W            | K1a1b1a     | K           | K            | 37             |
| 444 | JQ702246.1           | JQ702246.1; G2a2; Asia_E; 43; A73G; T152C; A263G               | 16568 | Asia_E            | G2a2        | G           | G            | 43             |
| 445 | JQ702247.1           | JQ702247.1; M59; Asia_S; 42; A73G; A249G; A263G                | 16568 | Asia_S            | M59         | M           | M59          | 42             |
| 446 | JQ702248.1           | JQ702248.1; X1c; Asia_W_America_N; 32; A73G; T146C; A153G      | 16567 | Asia_W_America_N  | X1c         | X           | X            | 32             |
| 447 | JQ702249.1           | JQ702249.1; W1g; Asia_W; 34; A73G; A189G; T195C                | 16570 | Asia_W            | W1g         | W           | W            | 34             |
| 448 | JQ702250.1           | JQ702250.1; U2e2a1a; Asia_S_W_Europe; 40; A73G; T152C; T217C   | 16569 | Asia_S_W_Europe   | U2e2a1a     | U           | U2           | 40             |
| 449 | JQ702251.1           | JQ702251.1; A2f2; Asia_NE_America_N; 37; C64T; A73G; A153G     | 16568 | Asia_NE_America_N | A2f2        | A           | A            | 37             |
| 450 | JQ702252.1           | JQ702252.1; H; Asia_W_Europe; 14; A73G; A263G; C309CCT         | 16570 | Asia_W_Europe     | H           | H           | H            | 14             |
| 451 | JQ702253.1           | JQ702253.1; I2c; Asia_W_SW; 35; A73G; T199C; T204C             | 16571 | Asia_W_SW         | I2c         | I           | I            | 35             |

**Supplementary Table S3** Human mitochondrial database (hMITO DB v1.0) metadata

| Row | Name (accession no.) | Description                                                     | Size  | Geo_Region            | Haplogroup | Macro_Haplo | Macro_Haplo2 | Total Variants |
|-----|----------------------|-----------------------------------------------------------------|-------|-----------------------|------------|-------------|--------------|----------------|
| 452 | JQ702254.1           | JQ702254.1; K1d1; Asia_W; 38; A73G; T195C; A263G                | 16573 | Asia_W                | K1d1       | K           | K            | 38             |
| 453 | JQ702255.1           | JQ702255.1; A12a; Asia_NE_America_N; 39; A73G; T152C; A235G     | 16568 | Asia_NE_America_N     | A12a       | A           | A            | 39             |
| 454 | JQ702256.1           | JQ702256.1; H35a; Asia_W_Europe; 12; A263G; C309CCT; T310C      | 16570 | Asia_W_Europe         | H35a       | H           | H            | 12             |
| 455 | JQ702257.1           | JQ702257.1; V2; Europe_S; 19; T72C; A263G; C309CCT              | 16570 | Europe_S              | V2         | V           | V            | 19             |
| 456 | JQ702258.1           | JQ702258.1; F1a1; Asia_SE_E; 35; A73G; A249d; A263G             | 16567 | Asia_SE_E             | F1a1       | F           | F            | 35             |
| 457 | JQ702259.1           | JQ702259.1; J1b1a1; Asia_W; 36; A73G; C242T; A263G              | 16569 | Asia_W                | J1b1a1     | J           | J            | 36             |
| 458 | JQ702260.1           | JQ702260.1; H5; Asia_W_Europe; 16; A263G; C315CC; C456T         | 16569 | Asia_W_Europe         | H5         | H           | H            | 16             |
| 459 | JQ702261.1           | JQ702261.1; L2a1c1a2; Africa_W_C; 61; A73G; G143A; T146C        | 16569 | Africa_W_C            | L2a1c1a2   | L2          | L2           | 61             |
| 460 | JQ702262.1           | JQ702262.1; H1bb; Asia_W_Europe; 13; A73G; T152C; A263G         | 16571 | Asia_W_Europe         | H1bb       | H           | H            | 13             |
| 461 | JQ702263.1           | JQ702263.1; H1e2c; Asia_W_Europe; 14; A73G; A263G; C315CC       | 16570 | Asia_W_Europe         | H1e2c      | H           | H            | 14             |
| 462 | JQ702264.1           | JQ702264.1; D5a3a1a; Asia_E_America_N_S; 44; A73G; T146C; C150T | 16570 | Asia_E_America_N_S    | D5a3a1a    | D           | D            | 44             |
| 463 | JQ702265.1           | JQ702265.1; H6a1a2b1; Asia_W_Europe; 21; T239C; A263G; C309CCCT | 16571 | Asia_W_Europe         | H6a1a2b1   | H           | H            | 21             |
| 464 | JQ702266.1           | JQ702266.1; K1a; Asia_W; 33; A73G; G228A; A263G                 | 16569 | Asia_W                | K1a        | K           | K            | 33             |
| 465 | JQ702267.1           | JQ702267.1; U4d1a1; Asia_W_Europe_C; 35; A73G; T195C; A263G     | 16573 | Asia_W_Europe_C       | U4d1a1     | U           | U4           | 35             |
| 466 | JQ702268.1           | JQ702268.1; D4h1c1; Asia_E_America_N_S; 42; A73G; T152C; A263G  | 16569 | Asia_E_America_N_S    | D4h1c1     | D           | D            | 42             |
| 467 | JQ702269.1           | JQ702269.1; H1az; Asia_W_Europe; 11; A263G; C309CCT; T310C      | 16570 | Asia_W_Europe         | H1az       | H           | H            | 11             |
| 468 | JQ702270.1           | JQ702270.1; U4a1b; Asia_N_Europe_N; 33; A73G; T152C; T195C      | 16570 | Asia_N_Europe_N       | U4a1b      | U           | U4           | 33             |
| 469 | JQ702271.1           | JQ702271.1; K1a16; Asia_W; 33; A73G; T195C; A263G               | 16573 | Asia_W                | K1a16      | K           | K            | 33             |
| 470 | JQ702272.1           | JQ702272.1; H10h; Asia_W_Europe; 13; A263G; C315CC; A750G       | 16569 | Asia_W_Europe         | H10h       | H           | H            | 13             |
| 471 | JQ702273.1           | JQ702273.1; K1a+150; Asia_W; 32; A73G; C150T; T152C             | 16569 | Asia_W                | K1a+150    | K           | K            | 32             |
| 472 | JQ702274.1           | JQ702274.1; T1a1; Asia_W; 35; A73G; T152C; T195C                | 16569 | Asia_W                | T1a1       | T           | T            | 35             |
| 473 | JQ702275.1           | JQ702275.1; H1at1a; Asia_W_Europe; 13; T152C; A263G; C315CC     | 16569 | Asia_W_Europe         | H1at1a     | H           | H            | 13             |
| 474 | JQ702276.1           | JQ702276.1; K1a10a; Asia_W; 36; A73G; T195C; A230T              | 16571 | Asia_W                | K1a10a     | K           | K            | 36             |
| 475 | JQ702277.1           | JQ702277.1; H7c4; Asia_W_Europe; 19; G75A; A263G; C309CCCT      | 16571 | Asia_W_Europe         | H7c4       | H           | H            | 19             |
| 476 | JQ702278.1           | JQ702278.1; T2b4i; Asia_W; 37; A73G; A263G; C309CCT             | 16570 | Asia_W                | T2b4i      | T           | T            | 37             |
| 477 | JQ702279.1           | JQ702279.1; H34; Asia_W_Europe; 16; T152C; A263G; C309CCCT      | 16571 | Asia_W_Europe         | H34        | H           | H            | 16             |
| 478 | JQ702280.1           | JQ702280.1; U4a3a; Asia_N_Europe_N; 35; A73G; T195C; G247A      | 16571 | Asia_N_Europe_N       | U4a3a      | U           | U4           | 35             |
| 479 | JQ702281.1           | JQ702281.1; K1a4a1; Asia_W; 38; A73G; T152C; T204C              | 16569 | Asia_W                | K1a4a1     | K           | K            | 38             |
| 480 | JQ702282.1           | JQ702282.1; K2a9; Asia_W; 34; A73G; T146C; A263G                | 16569 | Asia_W                | K2a9       | K           | K            | 34             |
| 481 | JQ702283.1           | JQ702283.1; H14a2b; Asia_W_Europe; 14; A263G; C315CC; A750G     | 16569 | Asia_W_Europe         | H14a2b     | H           | H            | 14             |
| 482 | JQ702284.1           | JQ702284.1; I2; Asia_W_SW; 35; A73G; T152C; T199C               | 16570 | Asia_W_SW             | I2         | I           | I            | 35             |
| 483 | JQ702285.1           | JQ702285.1; H6b; Asia_W_Europe; 16; T239C; A263G; C309CCCT      | 16573 | Asia_W_Europe         | H6b        | H           | H            | 16             |
| 484 | JQ702286.1           | JQ702286.1; T2e1; Asia_W; 35; C41T; A73G; C150T                 | 16570 | Asia_W                | T2e1       | T           | T            | 35             |
| 485 | JQ702287.1           | JQ702287.1; H2a2a1b; Asia_W_Europe; 1; A9299G; ;                | 16568 | Asia_W_Europe         | H2a2a1b    | H           | H            | 1              |
| 486 | JQ702288.1           | JQ702288.1; H1j3; Asia_W_Europe; 13; A263G; C315CC; A750G       | 16570 | Asia_W_Europe         | H1j3       | H           | H            | 13             |
| 487 | JQ702289.1           | JQ702289.1; D4q; Asia_E_America_N_S; 40; A73G; T146C; A153G     | 16569 | Asia_E_America_N_S    | D4q        | D           | D            | 40             |
| 488 | JQ702290.1           | JQ702290.1; A2d1a; Asia_NE_America_N; 35; A73G; T146C; A153G    | 16558 | Asia_NE_America_N     | A2d1a      | A           | A            | 35             |
| 489 | JQ702291.1           | JQ702291.1; H4a1a1; Asia_W_Europe; 17; A263G; C315CC; A750G     | 16569 | Asia_W_Europe         | H4a1a1     | H           | H            | 17             |
| 490 | JQ702292.1           | JQ702292.1; H100; Asia_W_Europe; 14; A93G; A200G; A263G         | 16569 | Asia_W_Europe         | H100       | H           | H            | 14             |
| 491 | JQ702293.1           | JQ702293.1; B2I; Asia_SE_E_America_N_S; 32; A73G; T159C; A263G  | 16562 | Asia_SE_E_America_N_S | B2I        | B           | B            | 32             |
| 492 | JQ702294.1           | JQ702294.1; T2f5; Asia_W; 38; A73G; A263G; C315CC               | 16560 | Asia_W                | T2f5       | T           | T            | 38             |

**Supplementary Table S3** Human mitochondrial database (hMITO DB v1.0) metadata

| Row | Name (accession no.) | Description                                                     | Size  | Geo_Region            | Haplogroup | Macro_Haplo | Macro_Haplo2 | Total Variants |
|-----|----------------------|-----------------------------------------------------------------|-------|-----------------------|------------|-------------|--------------|----------------|
| 493 | JQ702295.1           | JQ702295.1; U5b3e; Asia_W_Europe_C; 28; A73G; C150T; G228A      | 16569 | Asia_W_Europe_C       | U5b3e      | U           | U5           | 28             |
| 494 | JQ702296.1           | JQ702296.1; H1c1; Asia_W_Europe; 12; A263G; C315CC; T477C       | 16569 | Asia_W_Europe         | H1c1       | H           | H            | 12             |
| 495 | JQ702297.1           | JQ702297.1; H33a; Asia_W_Europe; 9; A263G; C315CC; A750G        | 16569 | Asia_W_Europe         | H33a       | H           | H            | 9              |
| 496 | JQ702298.1           | JQ702298.1; W3b1; Asia_W; 37; A73G; C194T; T195C                | 16570 | Asia_W                | W3b1       | W           | W            | 37             |
| 497 | JQ702299.1           | JQ702299.1; HV+16311; Asia_W_Europe; 16; T195C; A263G; C309CCT  | 16570 | Asia_W_Europe         | HV+16311   | H           | H            | 16             |
| 498 | JQ702300.1           | JQ702300.1; V16; Europe_S; 15; T72C; A263G; C315CC              | 16569 | Europe_S              | V16        | V           | V            | 15             |
| 499 | JQ702301.1           | JQ702301.1; H5a1g1a; Asia_W_Europe; 20; T152C; A200G; A263G     | 16567 | Asia_W_Europe         | H5a1g1a    | H           | H            | 20             |
| 500 | JQ702302.1           | JQ702302.1; K1a4a1f1; Asia_W; 38; A73G; T152C; T217C            | 16569 | Asia_W                | K1a4a1f1   | K           | K            | 38             |
| 501 | JQ702303.1           | JQ702303.1; H13a1a1a; Asia_W_Europe; 17; T152C; A263G; C309CCT  | 16570 | Asia_W_Europe         | H13a1a1a   | H           | H            | 17             |
| 502 | JQ702304.1           | JQ702304.1; K1b1a1c; Asia_W; 44; A73G; T152C; A263G             | 16572 | Asia_W                | K1b1a1c    | K           | K            | 44             |
| 503 | JQ702305.1           | JQ702305.1; H18; Asia_W_Europe; 12; A263G; C315CC; A750G        | 16569 | Asia_W_Europe         | H18        | H           | H            | 12             |
| 504 | JQ702306.1           | JQ702306.1; K1a2c; Asia_W; 37; A73G; T146C; T152C               | 16574 | Asia_W                | K1a2c      | K           | K            | 37             |
| 505 | JQ702307.1           | JQ702307.1; L2a1c; Africa_W_C; 57; A73G; G143A; T146C           | 16566 | Africa_W_C            | L2a1c      | L2          | L2           | 57             |
| 506 | JQ702308.1           | JQ702308.1; H1+16189; Asia_W_Europe; 14; A263G; C309CCCT; T310C | 16571 | Asia_W_Europe         | H1+16189   | H           | H            | 14             |
| 507 | JQ702309.1           | JQ702309.1; H2a2b3; Asia_W_Europe; 9; A263G; C309CCT; T310C     | 16570 | Asia_W_Europe         | H2a2b3     | H           | H            | 9              |
| 508 | JQ702310.1           | JQ702310.1; U5a2+16294; Asia_W_Europe_C; 35; C64T; A73G; T152C  | 16569 | Asia_W_Europe_C       | U5a2+16294 | U           | U5           | 35             |
| 509 | JQ702311.1           | JQ702311.1; J1c2e; Asia_W; 37; A73G; A93G; G185A                | 16568 | Asia_W                | J1c2e      | J           | J            | 37             |
| 510 | JQ702312.1           | JQ702312.1; T2b26; Asia_W; 36; A73G; C309CCT; T310C             | 16572 | Asia_W                | T2b26      | T           | T            | 36             |
| 511 | JQ702313.1           | JQ702313.1; H1e7; Asia_W_Europe; 14; A263G; C309CCT; T310C      | 16572 | Asia_W_Europe         | H1e7       | H           | H            | 14             |
| 512 | JQ702314.1           | JQ702314.1; H36; Asia_W_Europe; 16; T152C; A263G; C309CCT       | 16570 | Asia_W_Europe         | H36        | H           | H            | 16             |
| 513 | JQ702315.1           | JQ702315.1; K1a4a1i; Asia_W; 33; A73G; A263G; C315CC            | 16569 | Asia_W                | K1a4a1i    | K           | K            | 33             |
| 514 | JQ702316.1           | JQ702316.1; U2e1e; Asia_S_W_Europe; 42; A73G; T152C; T217C      | 16569 | Asia_S_W_Europe       | U2e1e      | U           | U2           | 42             |
| 515 | JQ702317.1           | JQ702317.1; H5a1g1a; Asia_W_Europe; 20; A263G; C309CCCT; T310C  | 16569 | Asia_W_Europe         | H5a1g1a    | H           | H            | 20             |
| 516 | JQ702318.1           | JQ702318.1; H6a1a; Asia_W_Europe; 17; T239C; A263G; C309CCCT    | 16571 | Asia_W_Europe         | H6a1a      | H           | H            | 17             |
| 517 | JQ702319.1           | JQ702319.1; H6a1a2a; Asia_W_Europe; 20; C41T; T239C; A263G      | 16570 | Asia_W_Europe         | H6a1a2a    | H           | H            | 20             |
| 518 | JQ702320.1           | JQ702320.1; U5a2b4; Asia_W_Europe_C; 31; A73G; A263G; C309CCT   | 16572 | Asia_W_Europe_C       | U5a2b4     | U           | U5           | 31             |
| 519 | JQ702321.1           | JQ702321.1; C5c1a; Asia_NE_America_N_S; 46; A73G; T152C; A249d  | 16569 | Asia_NE_America_N_S   | C5c1a      | C           | C            | 46             |
| 520 | JQ702322.1           | JQ702322.1; B2; Asia_SE_E_America_N_S; 35; A73G; G185A; A189G   | 16559 | Asia_SE_E_America_N_S | B2         | B           | B            | 35             |
| 521 | JQ702323.1           | JQ702323.1; T2b4a1; Asia_W; 37; A73G; A263G; C309CCT            | 16570 | Asia_W                | T2b4a1     | T           | T            | 37             |
| 522 | JQ702324.1           | JQ702324.1; A2ac1; Asia_NE_America_N; 38; C64T; A73G; T146C     | 16568 | Asia_NE_America_N     | A2ac1      | A           | A            | 38             |
| 523 | JQ702325.1           | JQ702325.1; K1b2a2a; Asia_W; 37; A73G; T146C; T195C             | 16569 | Asia_W                | K1b2a2a    | K           | K            | 37             |
| 524 | JQ702326.1           | JQ702326.1; L0a1b1a1; Africa_S_SE; 88; A93G; A95C; G185A        | 16569 | Africa_S_SE           | L0a1b1a1   | L0          | L0           | 88             |
| 525 | JQ702327.1           | JQ702327.1; W1c1; Asia_W; 36; A73G; T119C; A189G                | 16569 | Asia_W                | W1c1       | W           | W            | 36             |
| 526 | JQ702328.1           | JQ702328.1; H1e; Asia_W_Europe; 11; A263G; C315CC; A750G        | 16569 | Asia_W_Europe         | H1e        | H           | H            | 11             |
| 527 | JQ702329.1           | JQ702329.1; H3g1b; Asia_W_Europe; 16; T152C; A263G; C309CCT     | 16570 | Asia_W_Europe         | H3g1b      | H           | H            | 16             |
| 528 | JQ702330.1           | JQ702330.1; H6a1b4; Asia_W_Europe; 19; T239C; A263G; C309CCCT   | 16571 | Asia_W_Europe         | H6a1b4     | H           | H            | 19             |
| 529 | JQ702331.1           | JQ702331.1; U5a1b; Asia_W_Europe_C; 25; A73G; A263G; C309CCT    | 16570 | Asia_W_Europe_C       | U5a1b      | U           | U5           | 25             |
| 530 | JQ702332.1           | JQ702332.1; W1; Asia_W; 34; A73G; G143A; A189G                  | 16569 | Asia_W                | W1         | W           | W            | 34             |
| 531 | JQ702333.1           | JQ702333.1; K1c1b; Asia_W; 35; A73G; T146C; T152C               | 16568 | Asia_W                | K1c1b      | K           | K            | 35             |
| 532 | JQ702334.1           | JQ702334.1; H1i; Asia_W_Europe; 15; T152C; A263G; C309CCT       | 16570 | Asia_W_Europe         | H1i        | H           | H            | 15             |
| 533 | JQ702335.1           | JQ702335.1; H1an2; Asia_W_Europe; 14; C151T; T152C; A263G       | 16569 | Asia_W_Europe         | H1an2      | H           | H            | 14             |

**Supplementary Table S3** Human mitochondrial database (hMITO DB v1.0) metadata

| Row | Name (accession no.) | Description                                                      | Size  | Geo_Region      | Haplogroup | Macro_Haplo | Macro_Haplo2 | Total Variants |
|-----|----------------------|------------------------------------------------------------------|-------|-----------------|------------|-------------|--------------|----------------|
| 534 | JQ702336.1           | JQ702336.1; H1c15; Asia_W_Europe; 14; A263G; C309CCT; T310C      | 16573 | Asia_W_Europe   | H1c15      | H           | H            | 14             |
| 535 | JQ702337.1           | JQ702337.1; H7d2a; Asia_W_Europe; 13; A263G; A291AA; C315CC      | 16570 | Asia_W_Europe   | H7d2a      | H           | H            | 13             |
| 536 | JQ702338.1           | JQ702338.1; J1c7a; Asia_W; 35; A73G; G185A; T195C                | 16571 | Asia_W          | J1c7a      | J           | J            | 35             |
| 537 | JQ702339.1           | JQ702339.1; U5a1a1; Asia_W_Europe_C; 29; A73G; A263G; C309CCT    | 16572 | Asia_W_Europe_C | U5a1a1     | U           | U5           | 29             |
| 538 | JQ702340.1           | JQ702340.1; T1a1; Asia_W; 37; A73G; T152C; T195C                 | 16570 | Asia_W          | T1a1       | T           | T            | 37             |
| 539 | JQ702341.1           | JQ702341.1; K1a4a1e; Asia_W; 37; A73G; T152C; T204C              | 16571 | Asia_W          | K1a4a1e    | K           | K            | 37             |
| 540 | JQ702342.1           | JQ702342.1; I1a1d; Asia_W_SW; 48; A73G; T199C; G203A             | 16570 | Asia_W_SW       | I1a1d      | I           | I            | 48             |
| 541 | JQ702343.1           | JQ702343.1; T1a1+@152; Asia_W; 35; A73G; T195C; A263G            | 16570 | Asia_W          | T1a1+@152  | T           | T            | 35             |
| 542 | JQ702344.1           | JQ702344.1; T2a1b; Asia_W; 36; A73G; A263G; C315CC               | 16569 | Asia_W          | T2a1b      | T           | T            | 36             |
| 543 | JQ702345.1           | JQ702345.1; H5b3; Asia_W_Europe; 15; T199C; A263G; C309CCT       | 16570 | Asia_W_Europe   | H5b3       | H           | H            | 15             |
| 544 | JQ702346.1           | JQ702346.1; J2b1a4; Asia_W; 36; A73G; C150T; T152C               | 16573 | Asia_W          | J2b1a4     | J           | J            | 36             |
| 545 | JQ702347.1           | JQ702347.1; U5a1b; Asia_W_Europe_C; 26; A73G; A263G; C315CC      | 16569 | Asia_W_Europe_C | U5a1b      | U           | U5           | 26             |
| 546 | JQ702348.1           | JQ702348.1; K1a3a1b; Asia_W; 36; A73G; A263G; C309CCT            | 16572 | Asia_W          | K1a3a1b    | K           | K            | 36             |
| 547 | JQ702349.1           | JQ702349.1; H1e1c; Asia_W_Europe; 13; A263G; C315CC; A750G       | 16569 | Asia_W_Europe   | H1e1c      | H           | H            | 13             |
| 548 | JQ702350.1           | JQ702350.1; T2f1a1; Asia_W; 42; A73G; T195C; A263G               | 16561 | Asia_W          | T2f1a1     | T           | T            | 42             |
| 549 | JQ702351.1           | JQ702351.1; U4a2d; Asia_N_Europe_N; 29; A73G; T195C; A263G       | 16568 | Asia_N_Europe_N | U4a2d      | U           | U4           | 29             |
| 550 | JQ702352.1           | JQ702352.1; H3a1a; Asia_W_Europe; 16; T152C; G228A; A263G        | 16570 | Asia_W_Europe   | H3a1a      | H           | H            | 16             |
| 551 | JQ702353.1           | JQ702353.1; K2a3; Asia_W; 37; A73G; T146C; T152C                 | 16570 | Asia_W          | K2a3       | K           | K            | 37             |
| 552 | JQ702354.1           | JQ702354.1; H24; Asia_W_Europe; 10; A263G; C315CC; A750G         | 16569 | Asia_W_Europe   | H24        | H           | H            | 10             |
| 553 | JQ702355.1           | JQ702355.1; U5a2a1b1; Asia_W_Europe_C; 31; A73G; T204C; T252C    | 16570 | Asia_W_Europe_C | U5a2a1b1   | U           | U5           | 31             |
| 554 | JQ702356.1           | JQ702356.1; T2a1b1a; Asia_W; 40; A73G; T152C; A263G              | 16569 | Asia_W          | T2a1b1a    | T           | T            | 40             |
| 555 | JQ702357.1           | JQ702357.1; H61a; Asia_W_Europe; 13; A263G; C315CC; A750G        | 16569 | Asia_W_Europe   | H61a       | H           | H            | 13             |
| 556 | JQ702358.1           | JQ702358.1; W9; Asia_W; 36; A73G; G143A; A189G                   | 16570 | Asia_W          | W9         | W           | W            | 36             |
| 557 | JQ702359.1           | JQ702359.1; H1b1+16362; Asia_W_Europe; 16; A263G; C315CC; CA522d | 16567 | Asia_W_Europe   | H1b1+16362 | H           | H            | 16             |
| 558 | JQ702360.1           | JQ702360.1; H1o; Asia_W_Europe; 13; C150T; A263G; C315CC         | 16569 | Asia_W_Europe   | H1o        | H           | H            | 13             |
| 559 | JQ702361.1           | JQ702361.1; H4a1a4b; Asia_W_Europe; 19; T195C; A263G; C315CC     | 16567 | Asia_W_Europe   | H4a1a4b    | H           | H            | 19             |
| 560 | JQ702362.1           | JQ702362.1; H1n+146; Asia_W_Europe; 14; T146C; A263G; C309CCCT   | 16571 | Asia_W_Europe   | H1n+146    | H           | H            | 14             |
| 561 | JQ702363.1           | JQ702363.1; H24a; Asia_W_Europe; 12; A263G; C315CC; A750G        | 16569 | Asia_W_Europe   | H24a       | H           | H            | 12             |
| 562 | JQ702364.1           | JQ702364.1; J2a1a2a1a; Asia_W; 43; A73G; C150T; T152C            | 16570 | Asia_W          | J2a1a2a1a  | J           | J            | 43             |
| 563 | JQ702365.1           | JQ702365.1; K1a+195; Asia_W; 33; A73G; T195C; A263G              | 16572 | Asia_W          | K1a+195    | K           | K            | 33             |
| 564 | JQ702366.1           | JQ702366.1; J1c2m1; Asia_W; 35; A73G; G185A; A188G               | 16570 | Asia_W          | J1c2m1     | J           | J            | 35             |
| 565 | JQ702367.1           | JQ702367.1; H47; Asia_W_Europe; 11; A263G; C315CC; A750G         | 16569 | Asia_W_Europe   | H47        | H           | H            | 11             |
| 566 | JQ702368.1           | JQ702368.1; H2a2b1a; Asia_W_Europe; 10; A263G; C309CCT; T310C    | 16570 | Asia_W_Europe   | H2a2b1a    | H           | H            | 10             |
| 567 | JQ702369.1           | JQ702369.1; I4a; Asia_W_SW; 34; A73G; T199C; T204C               | 16569 | Asia_W_SW       | I4a        | I           | I            | 34             |
| 568 | JQ702370.1           | JQ702370.1; H1ae2a; Asia_W_Europe; 14; A263G; C309CCT; T310C     | 16570 | Asia_W_Europe   | H1ae2a     | H           | H            | 14             |
| 569 | JQ702371.1           | JQ702371.1; H1ba; Asia_W_Europe; 12; A263G; C315CC; A750G        | 16569 | Asia_W_Europe   | H1ba       | H           | H            | 12             |
| 570 | JQ702372.1           | JQ702372.1; K1a3a; Asia_W; 38; A73G; T199C; A263G                | 16570 | Asia_W          | K1a3a      | K           | K            | 38             |
| 571 | JQ702373.1           | JQ702373.1; K2a6; Asia_W; 33; A73G; T146C; T152C                 | 16569 | Asia_W          | K2a6       | K           | K            | 33             |
| 572 | JQ702374.1           | JQ702374.1; H23; Asia_W_Europe; 10; A263G; C315CC; A750G         | 16569 | Asia_W_Europe   | H23        | H           | H            | 10             |
| 573 | JQ702375.1           | JQ702375.1; H58a; Asia_W_Europe; 16; T152C; A263G; C309CCT       | 16570 | Asia_W_Europe   | H58a       | H           | H            | 16             |
| 574 | JQ702376.1           | JQ702376.1; U5b1d1a; Asia_W_Europe_C; 29; A73G; C150T; A263G     | 16572 | Asia_W_Europe_C | U5b1d1a    | U           | U5           | 29             |

**Supplementary Table S3** Human mitochondrial database (hMITO DB v1.0) metadata

| Row | Name (accession no.) | Description                                                     | Size  | Geo_Region         | Haplogroup | Macro_Haplo | Macro_Haplo2 | Total Variants |
|-----|----------------------|-----------------------------------------------------------------|-------|--------------------|------------|-------------|--------------|----------------|
| 575 | JQ702377.1           | JQ702377.1; H1a1; Asia_W_Europe; 14; A73G; A263G; C315CC        | 16569 | Asia_W_Europe      | H1a1       | H           | H            | 14             |
| 576 | JQ702378.1           | JQ702378.1; H7b2a; Asia_W_Europe; 15; A189G; A263G; C309CCT     | 16570 | Asia_W_Europe      | H7b2a      | H           | H            | 15             |
| 577 | JQ702379.1           | JQ702379.1; T2a1a; Asia_W; 37; A73G; A263G; C309CCT             | 16570 | Asia_W             | T2a1a      | T           | T            | 37             |
| 578 | JQ702380.1           | JQ702380.1; K2a7; Asia_W; 34; A73G; T146C; T152C                | 16568 | Asia_W             | K2a7       | K           | K            | 34             |
| 579 | JQ702381.1           | JQ702381.1; L3b1a; Africa_E; 42; A73G; T195C; A263G             | 16565 | Africa_E           | L3b1a      | L3          | L3           | 42             |
| 580 | JQ702382.1           | JQ702382.1; H1c; Asia_W_Europe; 12; A263G; C309CCT; T310C       | 16570 | Asia_W_Europe      | H1c        | H           | H            | 12             |
| 581 | JQ702383.1           | JQ702383.1; H1bs; Asia_W_Europe; 15; A263G; C309CCT; T310C      | 16570 | Asia_W_Europe      | H1bs       | H           | H            | 15             |
| 582 | JQ702384.1           | JQ702384.1; U5b1b1a; Asia_W_Europe_C; 28; A73G; C150T; A263G    | 16569 | Asia_W_Europe_C    | U5b1b1a    | U           | U5           | 28             |
| 583 | JQ702385.1           | JQ702385.1; H6a1b4; Asia_W_Europe; 18; T152C; T239C; A263G      | 16569 | Asia_W_Europe      | H6a1b4     | H           | H            | 18             |
| 584 | JQ702386.1           | JQ702386.1; J1c5a1; Asia_W; 33; A73G; G185A; G228A              | 16569 | Asia_W             | J1c5a1     | J           | J            | 33             |
| 585 | JQ702387.1           | JQ702387.1; U5b2a1a1b; Asia_W_Europe_C; 33; A73G; C150T; A249d  | 16569 | Asia_W_Europe_C    | U5b2a1a1b  | U           | U5           | 33             |
| 586 | JQ702388.1           | JQ702388.1; H11a2a1; Asia_W_Europe; 18; T195C; A263G; C309CCT   | 16570 | Asia_W_Europe      | H11a2a1    | H           | H            | 18             |
| 587 | JQ702389.1           | JQ702389.1; U2e3a; Asia_S_W_Europe; 45; A73G; T146C; T152C      | 16572 | Asia_S_W_Europe    | U2e3a      | U           | U2           | 45             |
| 588 | JQ702390.1           | JQ702390.1; J1c2a1; Asia_W; 37; A73G; T146C; G185A              | 16570 | Asia_W             | J1c2a1     | J           | J            | 37             |
| 589 | JQ702391.1           | JQ702391.1; V15a; Europe_S; 19; T72C; A263G; C309CCT            | 16570 | Europe_S           | V15a       | V           | V            | 19             |
| 590 | JQ702392.1           | JQ702392.1; U5a2b; Asia_W_Europe_C; 27; A73G; A263G; C309CCT    | 16570 | Asia_W_Europe_C    | U5a2b      | U           | U5           | 27             |
| 591 | JQ702393.1           | JQ702393.1; A2r1; Asia_NE_America_N; 34; A73G; G103A; T146C     | 16568 | Asia_NE_America_N  | A2r1       | A           | A            | 34             |
| 592 | JQ702394.1           | JQ702394.1; K2b1a1a; Asia_W; 36; A73G; T146C; T199C             | 16569 | Asia_W             | K2b1a1a    | K           | K            | 36             |
| 593 | JQ702395.1           | JQ702395.1; J1c3c1; Asia_W; 31; A73G; G185A; G228A              | 16569 | Asia_W             | J1c3c1     | J           | J            | 31             |
| 594 | JQ702396.1           | JQ702396.1; H11a2a3; Asia_W_Europe; 18; T195C; A263G; C315CC    | 16569 | Asia_W_Europe      | H11a2a3    | H           | H            | 18             |
| 595 | JQ702397.1           | JQ702397.1; H2a1a; Asia_W_Europe; 12; A263G; C315CC; A750G      | 16569 | Asia_W_Europe      | H2a1a      | H           | H            | 12             |
| 596 | JQ702398.1           | JQ702398.1; U2e1a1; Asia_S_W_Europe; 41; A73G; T152C; T217C     | 16573 | Asia_S_W_Europe    | U2e1a1     | U           | U2           | 41             |
| 597 | JQ702399.1           | JQ702399.1; H13a1a1e; Asia_W_Europe; 18; A263G; C309CCT; T310C  | 16568 | Asia_W_Europe      | H13a1a1e   | H           | H            | 18             |
| 598 | JQ702400.1           | JQ702400.1; U5a1b1d; Asia_W_Europe_C; 29; A73G; A263G; C309CCT  | 16570 | Asia_W_Europe_C    | U5a1b1d    | U           | U5           | 29             |
| 599 | JQ702401.1           | JQ702401.1; H1+16189; Asia_W_Europe; 14; A263G; C309CCT; T310C  | 16570 | Asia_W_Europe      | H1+16189   | H           | H            | 14             |
| 600 | JQ702402.1           | JQ702402.1; H5c; Asia_W_Europe; 10; A263G; C315CC; C456T        | 16569 | Asia_W_Europe      | H5c        | H           | H            | 10             |
| 601 | JQ702403.1           | JQ702403.1; U4a2a; Asia_N_Europe_N; 31; A73G; T195C; G203A      | 16568 | Asia_N_Europe_N    | U4a2a      | U           | U4           | 31             |
| 602 | JQ702404.1           | JQ702404.1; U5a1d1; Asia_W_Europe_C; 30; A73G; A263G; C315CC    | 16569 | Asia_W_Europe_C    | U5a1d1     | U           | U5           | 30             |
| 603 | JQ702405.1           | JQ702405.1; H1a2; Asia_W_Europe; 12; A73G; A263G; C315CC        | 16569 | Asia_W_Europe      | H1a2       | H           | H            | 12             |
| 604 | JQ702406.1           | JQ702406.1; U5b2c1; Asia_W_Europe_C; 31; A73G; C150T; G185A     | 16571 | Asia_W_Europe_C    | U5b2c1     | U           | U5           | 31             |
| 605 | JQ702407.1           | JQ702407.1; M49c1; Asia_S; 33; A73G; T204C; A263G               | 16569 | Asia_S             | M49c1      | M           | M49          | 33             |
| 606 | JQ702408.1           | JQ702408.1; N3a; Africa_NE_Europe_E; 35; A73G; T146C; A210G     | 16570 | Africa_NE_Europe_E | N3a        | N           | N3           | 35             |
| 607 | JQ702409.1           | JQ702409.1; H1b; Asia_W_Europe; 15; T152C; A263G; C309CCT       | 16572 | Asia_W_Europe      | H1b        | H           | H            | 15             |
| 608 | JQ702410.1           | JQ702410.1; H4a1a1a1a1; Asia_W_Europe; 23; A73G; A263G; C309CCT | 16568 | Asia_W_Europe      | H4a1a1a1a1 | H           | H            | 23             |
| 609 | JQ702411.1           | JQ702411.1; H3ap; Asia_W_Europe; 12; T199C; A263G; C315CC       | 16569 | Asia_W_Europe      | H3ap       | H           | H            | 12             |
| 610 | JQ702412.1           | JQ702412.1; H5a1c1a; Asia_W_Europe; 18; A263G; C309CCT; T310C   | 16568 | Asia_W_Europe      | H5a1c1a    | H           | H            | 18             |
| 611 | JQ702413.1           | JQ702413.1; I3a; Asia_W_SW; 40; A73G; T152C; T199C              | 16576 | Asia_W_SW          | I3a        | I           | I            | 40             |
| 612 | JQ702414.1           | JQ702414.1; V2c; Europe_S; 18; A200G; A263G; C315CC             | 16569 | Europe_S           | V2c        | V           | V            | 18             |
| 613 | JQ702415.1           | JQ702415.1; H1b3; Asia_W_Europe; 15; A263G; C315CC; A750G       | 16569 | Asia_W_Europe      | H1b3       | H           | H            | 15             |
| 614 | JQ702416.1           | JQ702416.1; H3h; Asia_W_Europe; 12; A263G; C315CC; A750G        | 16569 | Asia_W_Europe      | H3h        | H           | H            | 12             |
| 615 | JQ702417.1           | JQ702417.1; K2a6; Asia_W; 34; A73G; T146C; T152C                | 16569 | Asia_W             | K2a6       | K           | K            | 34             |

**Supplementary Table S3** Human mitochondrial database (hMITO DB v1.0) metadata

| Row | Name (accession no.) | Description                                                               | Size  | Geo_Region        | Haplogroup     | Macro_Haplo | Macro_Haplo2 | Total Variants |
|-----|----------------------|---------------------------------------------------------------------------|-------|-------------------|----------------|-------------|--------------|----------------|
| 616 | JQ702418.1           | JQ702418.1; H6a1a; Asia_W_Europe; 17; T239C; A263G; C309CCT               | 16570 | Asia_W_Europe     | H6a1a          | H           | H            | 17             |
| 617 | JQ702419.1           | JQ702419.1; H73; Asia_W_Europe; 11; A263G; C309CCCT; T310C                | 16571 | Asia_W_Europe     | H73            | H           | H            | 11             |
| 618 | JQ702420.1           | JQ702420.1; L3d1b2; Africa_E; 35; A73G; C150T; T152C                      | 16570 | Africa_E          | L3d1b2         | L3          | L3           | 35             |
| 619 | JQ702421.1           | JQ702421.1; W3a1; Asia_W; 39; A73G; G143A; A189G                          | 16569 | Asia_W            | W3a1           | W           | W            | 39             |
| 620 | JQ702422.1           | JQ702422.1; H24a; Asia_W_Europe; 10; A263G; C315CC; A750G                 | 16569 | Asia_W_Europe     | H24a           | H           | H            | 10             |
| 621 | JQ702423.1           | JQ702423.1; H49; Asia_W_Europe; 13; A263G; C309CCT; T310C                 | 16570 | Asia_W_Europe     | H49            | H           | H            | 13             |
| 622 | JQ702424.1           | JQ702424.1; J2b1h; Asia_W; 39; A73G; C150T; T152C                         | 16570 | Asia_W            | J2b1h          | J           | J            | 39             |
| 623 | JQ702425.1           | JQ702425.1; A2ad; Asia_NE_America_N; 37; C64T; A73G; T146C                | 16568 | Asia_NE_America_N | A2ad           | A           | A            | 37             |
| 624 | JQ702426.1           | JQ702426.1; H2a1; Asia_W_Europe; 10; A263G; C315CC; A750G                 | 16569 | Asia_W_Europe     | H2a1           | H           | H            | 10             |
| 625 | JQ702427.1           | JQ702427.1; H3; Asia_W_Europe; 11; A263G; C309CCC; A750G                  | 16570 | Asia_W_Europe     | H3             | H           | H            | 11             |
| 626 | JQ702428.1           | JQ702428.1; L0a1a+200; Africa_S_SE; 87; C64T; A93G; T152C                 | 16568 | Africa_S_SE       | L0a1a+200      | L0          | L0           | 87             |
| 627 | JQ702429.1           | JQ702429.1; K2a2a1; Asia_W; 37; A73G; T146C; T152C                        | 16569 | Asia_W            | K2a2a1         | K           | K            | 37             |
| 628 | JQ702430.1           | JQ702430.1; L2a1+143+16189 (16192)+@16309; Africa_W_C; 57; A73G; G143A; T | 16571 | Africa_W_C        | L2a1+143+16189 | L2          | L2           | 57             |
| 629 | JQ702431.1           | JQ702431.1; U5b2a2c; Asia_W_Europe_C; 32; A73G; C150T; A263G              | 16569 | Asia_W_Europe_C   | U5b2a2c        | U           | U5           | 32             |
| 630 | JQ702432.1           | JQ702432.1; U2e2a1a1; Asia_S_W_Europe; 46; A73G; T146C; T152C             | 16573 | Asia_S_W_Europe   | U2e2a1a1       | U           | U2           | 46             |
| 631 | JQ702433.1           | JQ702433.1; H1e4; Asia_W_Europe; 12; T146C; A263G; C315CC                 | 16569 | Asia_W_Europe     | H1e4           | H           | H            | 12             |
| 632 | JQ702434.1           | JQ702434.1; J1b1a1; Asia_W; 38; A73G; T152C; C242T                        | 16569 | Asia_W            | J1b1a1         | J           | J            | 38             |
| 633 | JQ702435.1           | JQ702435.1; T2b13; Asia_W; 36; A73G; A263G; C309CCCT                      | 16571 | Asia_W            | T2b13          | T           | T            | 36             |
| 634 | JQ702436.1           | JQ702436.1; H1c1a1; Asia_W_Europe; 14; A263G; C315CC; T477C               | 16569 | Asia_W_Europe     | H1c1a1         | H           | H            | 14             |
| 635 | JQ702437.1           | JQ702437.1; U5a1a1c; Asia_W_Europe_C; 28; A73G; A263G; C315CC             | 16569 | Asia_W_Europe_C   | U5a1a1c        | U           | U5           | 28             |
| 636 | JQ702438.1           | JQ702438.1; V9; Europe_S; 16; T72C; T204C; A263G                          | 16570 | Europe_S          | V9             | V           | V            | 16             |
| 637 | JQ702439.1           | JQ702439.1; M3a2; Asia_S; 34; A73G; A263G; C315CC                         | 16570 | Asia_S            | M3a2           | M           | M3           | 34             |
| 638 | JQ702440.1           | JQ702440.1; J1c1; Asia_W; 35; A73G; G228A; A263G                          | 16569 | Asia_W            | J1c1           | J           | J            | 35             |
| 639 | JQ702441.1           | JQ702441.1; L1c3b1a; Africa_C; 90; A73G; C151T; T152C                     | 16566 | Africa_C          | L1c3b1a        | L1          | L1           | 90             |
| 640 | JQ702442.1           | JQ702442.1; J2b1a; Asia_W; 34; A73G; C150T; T152C                         | 16569 | Asia_W            | J2b1a          | J           | J            | 34             |
| 641 | JQ702443.1           | JQ702443.1; H73a; Asia_W_Europe; 14; A263G; C309CCT; T310C                | 16571 | Asia_W_Europe     | H73a           | H           | H            | 14             |
| 642 | JQ702444.1           | JQ702444.1; HV+16311; Asia_W_Europe; 14; T195C; A263G; C309CCT            | 16570 | Asia_W_Europe     | HV+16311       | H           | H            | 14             |
| 643 | JQ702445.1           | JQ702445.1; J1c2; Asia_W; 32; A73G; G185A; A188G                          | 16568 | Asia_W            | J1c2           | J           | J            | 32             |
| 644 | JQ702446.1           | JQ702446.1; U4b1a2; Asia_N_Europe_N; 34; A73G; T195C; A263G               | 16570 | Asia_N_Europe_N   | U4b1a2         | U           | U4           | 34             |
| 645 | JQ702447.1           | JQ702447.1; M3a1+204; Asia_S; 31; A73G; T204C; A263G                      | 16571 | Asia_S            | M3a1+204       | M           | M3           | 31             |
| 646 | JQ702448.1           | JQ702448.1; H67a; Asia_W_Europe; 13; A263G; C309CCCT; T310C               | 16571 | Asia_W_Europe     | H67a           | H           | H            | 13             |
| 647 | JQ702449.1           | JQ702449.1; H17b; Asia_W_Europe; 12; C150T; A263G; C315CC                 | 16569 | Asia_W_Europe     | H17b           | H           | H            | 12             |
| 648 | JQ702450.1           | JQ702450.1; W1c; Asia_W; 36; A73G; T119C; A189G                           | 16569 | Asia_W            | W1c            | W           | W            | 36             |
| 649 | JQ702451.1           | JQ702451.1; A2i; Asia_NE_America_N; 41; C64T; A73G; G94A                  | 16569 | Asia_NE_America_N | A2i            | A           | A            | 41             |
| 650 | JQ702452.1           | JQ702452.1; K1c1b; Asia_W; 36; A73G; T146C; T152C                         | 16568 | Asia_W            | K1c1b          | K           | K            | 36             |
| 651 | JQ702453.1           | JQ702453.1; H+152; Asia_W_Europe; 12; T152C; A263G; C309CCCT              | 16569 | Asia_W_Europe     | H+152          | H           | H            | 12             |
| 652 | JQ702454.1           | JQ702454.1; A2d1; Asia_NE_America_N; 38; C64T; A73G; T146C                | 16559 | Asia_NE_America_N | A2d1           | A           | A            | 38             |
| 653 | JQ702455.1           | JQ702455.1; H1b1h; Asia_W_Europe; 17; A263G; C309CCCT; T310C              | 16569 | Asia_W_Europe     | H1b1h          | H           | H            | 17             |
| 654 | JQ702456.1           | JQ702456.1; V13; Europe_S; 17; T72C; A263G; C309CCT                       | 16570 | Europe_S          | V13            | V           | V            | 17             |
| 655 | JQ702457.1           | JQ702457.1; I1a1c; Asia_W_SW; 43; A73G; A189G; T199C                      | 16572 | Asia_W_SW         | I1a1c          | I           | I            | 43             |
| 656 | JQ702458.1           | JQ702458.1; H1b1+16362; Asia_W_Europe; 17; C151T; A263G; C309CCCT         | 16569 | Asia_W_Europe     | H1b1+16362     | H           | H            | 17             |



**Supplementary Table S3** Human mitochondrial database (hMITO DB v1.0) metadata

| Row | Name (accession no.) | Description                                                    | Size  | Geo_Region       | Haplogroup | Macro_Haplo | Macro_Haplo2 | Total Variants |
|-----|----------------------|----------------------------------------------------------------|-------|------------------|------------|-------------|--------------|----------------|
| 657 | JQ702459.1           | JQ702459.1; J2b1g; Asia_W; 32; A73G; C150T; T152C              | 16567 | Asia_W           | J2b1g      | J           | J            | 32             |
| 658 | JQ702460.1           | JQ702460.1; T1a2; Asia_W; 38; A73G; T152C; A200G               | 16570 | Asia_W           | T1a2       | T           | T            | 38             |
| 659 | JQ702461.1           | JQ702461.1; T2b; Asia_W; 36; A73G; A263G; C309CCT              | 16568 | Asia_W           | T2b        | T           | T            | 36             |
| 660 | JQ702462.1           | JQ702462.1; H4a1a4b; Asia_W_Europe; 19; T195C; A263G; C315CC   | 16567 | Asia_W_Europe    | H4a1a4b    | H           | H            | 19             |
| 661 | JQ702463.1           | JQ702463.1; H5; Asia_W_Europe; 14; C150T; A263G; C309CCCT      | 16571 | Asia_W_Europe    | H5         | H           | H            | 14             |
| 662 | JQ702464.1           | JQ702464.1; T2b4+152; Asia_W; 39; A73G; T152C; A263G           | 16570 | Asia_W           | T2b4+152   | T           | T            | 39             |
| 663 | JQ702465.1           | JQ702465.1; H6a1b2; Asia_W_Europe; 20; T152C; T239C; A263G     | 16570 | Asia_W_Europe    | H6a1b2     | H           | H            | 20             |
| 664 | JQ702466.1           | JQ702466.1; H3ap; Asia_W_Europe; 13; A263G; C306T; CCT308-     | 16565 | Asia_W_Europe    | H3ap       | H           | H            | 13             |
| 665 | JQ702467.1           | JQ702467.1; H23; Asia_W_Europe; 11; A263G; C315CC; A750G       | 16569 | Asia_W_Europe    | H23        | H           | H            | 11             |
| 666 | JQ702468.1           | JQ702468.1; U5b2c1; Asia_W_Europe_C; 33; A73G; C150T; T152C    | 16571 | Asia_W_Europe_C  | U5b2c1     | U           | U5           | 33             |
| 667 | JQ702469.1           | JQ702469.1; R1a1a2; Asia_S_SE; 38; A73G; A263G; C295A          | 16570 | Asia_S_SE        | R1a1a2     | R           | R1           | 38             |
| 668 | JQ702470.1           | JQ702470.1; I1a1b; Asia_W_SW; 42; A73G; T199C; G203A           | 16572 | Asia_W_SW        | I1a1b      | I           | I            | 42             |
| 669 | JQ702471.1           | JQ702471.1; K1a4a1b2; Asia_W; 39; A73G; A263G; C309CCT         | 16570 | Asia_W           | K1a4a1b2   | K           | K            | 39             |
| 670 | JQ702472.1           | JQ702472.1; I1f; Asia_W_SW; 39; A73G; T152C; T199C             | 16572 | Asia_W_SW        | I1f        | I           | I            | 39             |
| 671 | JQ702473.1           | JQ702473.1; H2a1; Asia_W_Europe; 9; A263G; C309CCT; T310C      | 16570 | Asia_W_Europe    | H2a1       | H           | H            | 9              |
| 672 | JQ702474.1           | JQ702474.1; H1a6; Asia_W_Europe; 14; A73G; C151T; A263G        | 16569 | Asia_W_Europe    | H1a6       | H           | H            | 14             |
| 673 | JQ702475.1           | JQ702475.1; H6a1b2; Asia_W_Europe; 18; T239C; A263G; C315CC    | 16569 | Asia_W_Europe    | H6a1b2     | H           | H            | 18             |
| 674 | JQ702476.1           | JQ702476.1; T2b; Asia_W; 38; A73G; A263G; C309CCT              | 16570 | Asia_W           | T2b        | T           | T            | 38             |
| 675 | JQ702477.1           | JQ702477.1; J2b1a; Asia_W; 35; A73G; C150T; T152C              | 16570 | Asia_W           | J2b1a      | J           | J            | 35             |
| 676 | JQ702478.1           | JQ702478.1; H1bs; Asia_W_Europe; 14; A263G; C309CCCT; T310C    | 16571 | Asia_W_Europe    | H1bs       | H           | H            | 14             |
| 677 | JQ702479.1           | JQ702479.1; H3m; Asia_W_Europe; 12; A263G; C315CC; A750G       | 16569 | Asia_W_Europe    | H3m        | H           | H            | 12             |
| 678 | JQ702480.1           | JQ702480.1; H1e1a; Asia_W_Europe; 19; A56AC; A263G; C309CCT    | 16571 | Asia_W_Europe    | H1e1a      | H           | H            | 19             |
| 679 | JQ702481.1           | JQ702481.1; L3d1a2; Africa_E; 41; A73G; T152C; T195C           | 16568 | Africa_E         | L3d1a2     | L3          | L3           | 41             |
| 680 | JQ702482.1           | JQ702482.1; X2b10; Asia_W_America_N; 34; A73G; T146C; A153G    | 16570 | Asia_W_America_N | X2b10      | X           | X            | 34             |
| 681 | JQ702483.1           | JQ702483.1; H1bw; Asia_W_Europe; 11; A263G; C315CC; A750G      | 16569 | Asia_W_Europe    | H1bw       | H           | H            | 11             |
| 682 | JQ702484.1           | JQ702484.1; R1a1a2; Asia_S_SE; 39; A73G; A263G; C295A          | 16570 | Asia_S_SE        | R1a1a2     | R           | R1           | 39             |
| 683 | JQ702485.1           | JQ702485.1; U2e1; Asia_S_W_Europe; 38; A73G; T152C; T217C      | 16573 | Asia_S_W_Europe  | U2e1       | U           | U2           | 38             |
| 684 | JQ702486.1           | JQ702486.1; J1c7; Asia_W; 34; A73G; T146C; G185A               | 16569 | Asia_W           | J1c7       | J           | J            | 34             |
| 685 | JQ702487.1           | JQ702487.1; K2b1a1; Asia_W; 37; A73G; T146C; A263G             | 16569 | Asia_W           | K2b1a1     | K           | K            | 37             |
| 686 | JQ702488.1           | JQ702488.1; J2b1g; Asia_W; 35; A73G; C150T; T152C              | 16567 | Asia_W           | J2b1g      | J           | J            | 35             |
| 687 | JQ702489.1           | JQ702489.1; H5; Asia_W_Europe; 12; A73G; A263G; C315CC         | 16569 | Asia_W_Europe    | H5         | H           | H            | 12             |
| 688 | JQ702490.1           | JQ702490.1; HV7; Asia_W; 19; T146C; A263G; C315CC              | 16567 | Asia_W           | HV7        | HV          | HV           | 19             |
| 689 | JQ702491.1           | JQ702491.1; H1e2d; Asia_W_Europe; 14; A263G; C315CC; CA522d    | 16567 | Asia_W_Europe    | H1e2d      | H           | H            | 14             |
| 690 | JQ702492.1           | JQ702492.1; T2b21b; Asia_W; 38; A73G; T152C; A263G             | 16570 | Asia_W           | T2b21b     | T           | T            | 38             |
| 691 | JQ702493.1           | JQ702493.1; I3c; Asia_W_SW; 36; A73G; T152C; T199C             | 16576 | Asia_W_SW        | I3c        | I           | I            | 36             |
| 692 | JQ702494.1           | JQ702494.1; H1ap1; Asia_W_Europe; 16; T152C; A191AA; A263G     | 16571 | Asia_W_Europe    | H1ap1      | H           | H            | 16             |
| 693 | JQ702495.1           | JQ702495.1; H1as2; Asia_W_Europe; 13; A263G; C309CCT; T310C    | 16570 | Asia_W_Europe    | H1as2      | H           | H            | 13             |
| 694 | JQ702496.1           | JQ702496.1; U5a1a2b1; Asia_W_Europe_C; 33; A73G; A263G; C315CC | 16569 | Asia_W_Europe_C  | U5a1a2b1   | U           | U5           | 33             |
| 695 | JQ702497.1           | JQ702497.1; H1bc; Asia_W_Europe; 16; T152C; A263G; C315CC      | 16571 | Asia_W_Europe    | H1bc       | H           | H            | 16             |
| 696 | JQ702498.1           | JQ702498.1; V1a1; Europe_S; 20; T72C; A263G; C309CCT           | 16570 | Europe_S         | V1a1       | V           | V            | 20             |
| 697 | JQ702499.1           | JQ702499.1; J1c2c1; Asia_W; 36; A73G; T146C; G185A             | 16569 | Asia_W           | J1c2c1     | J           | J            | 36             |

**Supplementary Table S3** Human mitochondrial database (hMITO DB v1.0) metadata

| Row | Name (accession no.) | Description                                                    | Size  | Geo_Region          | Haplogroup | Macro_Haplo | Macro_Haplo2 | Total Variants |
|-----|----------------------|----------------------------------------------------------------|-------|---------------------|------------|-------------|--------------|----------------|
| 698 | JQ702500.1           | JQ702500.1; U5b1b1a1a; Asia_W_Europe_C; 31; A73G; C150T; A263G | 16570 | Asia_W_Europe_C     | U5b1b1a1a  | U           | U5           | 31             |
| 699 | JQ702501.1           | JQ702501.1; H1c13; Asia_W_Europe; 11; A263G; C315CC; T477C     | 16569 | Asia_W_Europe       | H1c13      | H           | H            | 11             |
| 700 | JQ702502.1           | JQ702502.1; H5a1h; Asia_W_Europe; 13; A263G; C315CC; C456T     | 16567 | Asia_W_Europe       | H5a1h      | H           | H            | 13             |
| 701 | JQ702503.1           | JQ702503.1; L2a1c; Africa_W_C; 59; A73G; G143A; T146C          | 16570 | Africa_W_C          | L2a1c      | L2          | L2           | 59             |
| 702 | JQ702504.1           | JQ702504.1; L4b2b1; Africa_E; 56; A73G; T146C; T195C           | 16571 | Africa_E            | L4b2b1     | L3          | L3           | 56             |
| 703 | JQ702505.1           | JQ702505.1; K1a4; Asia_W; 33; A73G; A263G; C315CC              | 16571 | Asia_W              | K1a4       | K           | K            | 33             |
| 704 | JQ702506.1           | JQ702506.1; H6a1a; Asia_W_Europe; 17; T239C; A263G; C309CCT    | 16570 | Asia_W_Europe       | H6a1a      | H           | H            | 17             |
| 705 | JQ702507.1           | JQ702507.1; H3h7; Asia_W_Europe; 14; A93G; A263G; C309CCT      | 16570 | Asia_W_Europe       | H3h7       | H           | H            | 14             |
| 706 | JQ702508.1           | JQ702508.1; K1a9; Asia_W; 32; A73G; T195C; A263G               | 16569 | Asia_W              | K1a9       | K           | K            | 32             |
| 707 | JQ702509.1           | JQ702509.1; H6a1a1a; Asia_W_Europe; 21; T239C; A263G; C309CCT  | 16570 | Asia_W_Europe       | H6a1a1a    | H           | H            | 21             |
| 708 | JQ702510.1           | JQ702510.1; U5b2a1a1a; Asia_W_Europe_C; 29; A73G; C150T; A263G | 16569 | Asia_W_Europe_C     | U5b2a1a1a  | U           | U5           | 29             |
| 709 | JQ702511.1           | JQ702511.1; H10a1; Asia_W_Europe; 14; A263G; C309CCT; T310C    | 16570 | Asia_W_Europe       | H10a1      | H           | H            | 14             |
| 710 | JQ702512.1           | JQ702512.1; K1a9; Asia_W; 33; A73G; T195C; A263G               | 16569 | Asia_W              | K1a9       | K           | K            | 33             |
| 711 | JQ702513.1           | JQ702513.1; H; Asia_W_Europe; 10; A263G; C309CCT; T310C        | 16570 | Asia_W_Europe       | H          | H           | H            | 10             |
| 712 | JQ702514.1           | JQ702514.1; H2a2b4; Asia_W_Europe; 8; A263G; C309CCT; T310C    | 16570 | Asia_W_Europe       | H2a2b4     | H           | H            | 8              |
| 713 | JQ702515.1           | JQ702515.1; J1c2; Asia_W; 31; A73G; G185A; A188G               | 16570 | Asia_W              | J1c2       | J           | J            | 31             |
| 714 | JQ702516.1           | JQ702516.1; T2b4; Asia_W; 34; A73G; A263G; C315CC              | 16569 | Asia_W              | T2b4       | T           | T            | 34             |
| 715 | JQ702517.1           | JQ702517.1; K1a+195; Asia_W; 33; A73G; T195C; A263G            | 16571 | Asia_W              | K1a+195    | K           | K            | 33             |
| 716 | JQ702518.1           | JQ702518.1; H7a1b; Asia_W_Europe; 17; A263G; C309CCT; T310C    | 16570 | Asia_W_Europe       | H7a1b      | H           | H            | 17             |
| 717 | JQ702519.1           | JQ702519.1; I1a1; Asia_W_SW; 43; A73G; T199C; G203A            | 16573 | Asia_W_SW           | I1a1       | I           | I            | 43             |
| 718 | JQ702520.1           | JQ702520.1; U2e1d; Asia_S_W_Europe; 40; A73G; T152C; T217C     | 16573 | Asia_S_W_Europe     | U2e1d      | U           | U2           | 40             |
| 719 | JQ702521.1           | JQ702521.1; K1a4a; Asia_W; 38; A73G; T146C; A263G              | 16569 | Asia_W              | K1a4a      | K           | K            | 38             |
| 720 | JQ702522.1           | JQ702522.1; H41a; Asia_W_Europe; 15; C262T; A263G; C309CCCT    | 16572 | Asia_W_Europe       | H41a       | H           | H            | 15             |
| 721 | JQ702523.1           | JQ702523.1; H1bv1; Asia_W_Europe; 13; A263G; C315CC; A750G     | 16569 | Asia_W_Europe       | H1bv1      | H           | H            | 13             |
| 722 | JQ702524.1           | JQ702524.1; U5b1b1a; Asia_W_Europe_C; 30; A73G; C150T; A263G   | 16569 | Asia_W_Europe_C     | U5b1b1a    | U           | U5           | 30             |
| 723 | JQ702525.1           | JQ702525.1; J1c3b; Asia_W; 27; A73G; A263G; C295T              | 16569 | Asia_W              | J1c3b      | J           | J            | 27             |
| 724 | JQ702526.1           | JQ702526.1; HV0d; Asia_W; 17; T72C; T195C; A263G               | 16570 | Asia_W              | HV0d       | HV          | HV           | 17             |
| 725 | JQ702527.1           | JQ702527.1; H1b1c; Asia_W_Europe; 16; A263G; C315CC; CA522d    | 16567 | Asia_W_Europe       | H1b1c      | H           | H            | 16             |
| 726 | JQ702528.1           | JQ702528.1; H1c; Asia_W_Europe; 12; A263G; C309CCT; T310C      | 16570 | Asia_W_Europe       | H1c        | H           | H            | 12             |
| 727 | JQ702529.1           | JQ702529.1; H1b2; Asia_W_Europe; 14; T146C; A263G; C309CCCT    | 16571 | Asia_W_Europe       | H1b2       | H           | H            | 14             |
| 728 | JQ702530.1           | JQ702530.1; H3h2; Asia_W_Europe; 12; A263G; C315CC; A750G      | 16569 | Asia_W_Europe       | H3h2       | H           | H            | 12             |
| 729 | JQ702531.1           | JQ702531.1; U5b2b4; Asia_W_Europe_C; 33; A73G; C150T; A263G    | 16572 | Asia_W_Europe_C     | U5b2b4     | U           | U5           | 33             |
| 730 | JQ702532.1           | JQ702532.1; H1c; Asia_W_Europe; 12; A263G; C309CCT; T310C      | 16570 | Asia_W_Europe       | H1c        | H           | H            | 12             |
| 731 | JQ702533.1           | JQ702533.1; L3e2a1b; Africa_E; 36; A73G; C150T; T195C          | 16569 | Africa_E            | L3e2a1b    | L3          | L3           | 36             |
| 732 | JQ702534.1           | JQ702534.1; C1b5b; Asia_NE_America_N_S; 48; A73G; A249d; G255A | 16564 | Asia_NE_America_N_S | C1b5b      | C           | C            | 48             |
| 733 | JQ702535.1           | JQ702535.1; H1a5; Asia_W_Europe; 13; A73G; A263G; C315CC       | 16569 | Asia_W_Europe       | H1a5       | H           | H            | 13             |
| 734 | JQ702536.1           | JQ702536.1; HV16; Asia_W; 17; A263G; C309CCT; T310C            | 16570 | Asia_W              | HV16       | HV          | HV           | 17             |
| 735 | JQ702537.1           | JQ702537.1; H4a1a1a; Asia_W_Europe; 19; A73G; A263G; C315CC    | 16567 | Asia_W_Europe       | H4a1a1a    | H           | H            | 19             |
| 736 | JQ702538.1           | JQ702538.1; J1b6a; Asia_W; 32; A73G; A263G; C295T              | 16570 | Asia_W              | J1b6a      | J           | J            | 32             |
| 737 | JQ702539.1           | JQ702539.1; H; Asia_W_Europe; 9; A263G; C315CC; A750G          | 16569 | Asia_W_Europe       | H          | H           | H            | 9              |
| 738 | JQ702540.1           | JQ702540.1; K1a9; Asia_W; 33; A73G; T195C; A263G               | 16569 | Asia_W              | K1a9       | K           | K            | 33             |

**Supplementary Table S3** Human mitochondrial database (hMITO DB v1.0) metadata

| Row | Name (accession no.) | Description                                                       | Size  | Geo_Region       | Haplogroup | Macro_Haplo | Macro_Haplo2 | Total Variants |
|-----|----------------------|-------------------------------------------------------------------|-------|------------------|------------|-------------|--------------|----------------|
| 739 | JQ702541.1           | JQ702541.1; K1a; Asia_W; 36; A73G; T146C; A263G                   | 16569 | Asia_W           | K1a        | K           | K            | 36             |
| 740 | JQ702542.1           | JQ702542.1; H1j; Asia_W_Europe; 14; A93G; A263G; C315CC           | 16567 | Asia_W_Europe    | H1j        | H           | H            | 14             |
| 741 | JQ702543.1           | JQ702543.1; U5b2b1a1; Asia_W_Europe_C; 35; A73G; C150T; T204C     | 16570 | Asia_W_Europe_C  | U5b2b1a1   | U           | U5           | 35             |
| 742 | JQ702544.1           | JQ702544.1; T2b7a1; Asia_W; 39; A73G; T146C; T152C                | 16568 | Asia_W           | T2b7a1     | T           | T            | 39             |
| 743 | JQ702545.1           | JQ702545.1; W1b1; Asia_W; 37; A73G; A189G; T195C                  | 16570 | Asia_W           | W1b1       | W           | W            | 37             |
| 744 | JQ702546.1           | JQ702546.1; H4a1a4b2; Asia_W_Europe; 20; T195C; A263G; C315CC     | 16567 | Asia_W_Europe    | H4a1a4b2   | H           | H            | 20             |
| 745 | JQ702547.1           | JQ702547.1; T2b24a; Asia_W; 38; A73G; A263G; C309CCCT             | 16570 | Asia_W           | T2b24a     | T           | T            | 38             |
| 746 | JQ702548.1           | JQ702548.1; H7a1b; Asia_W_Europe; 13; A263G; C309CCCT; T310C      | 16571 | Asia_W_Europe    | H7a1b      | H           | H            | 13             |
| 747 | JQ702549.1           | JQ702549.1; U4a2h1; Asia_N_Europe_N; 29; A73G; T195C; A263G       | 16568 | Asia_N_Europe_N  | U4a2h1     | U           | U4           | 29             |
| 748 | JQ702550.1           | JQ702550.1; H5a1; Asia_W_Europe; 13; A263G; C315CC; C456T         | 16567 | Asia_W_Europe    | H5a1       | H           | H            | 13             |
| 749 | JQ702551.1           | JQ702551.1; Z1a1a; Asia_C_E; 47; A73G; C151T; T152C               | 16569 | Asia_C_E         | Z1a1a      | Z           | Z            | 47             |
| 750 | JQ702552.1           | JQ702552.1; U5a1b1f; Asia_W_Europe_C; 31; A73G; A263G; C315CC     | 16569 | Asia_W_Europe_C  | U5a1b1f    | U           | U5           | 31             |
| 751 | JQ702553.1           | JQ702553.1; J2b1a; Asia_W; 33; A73G; C150T; T152C                 | 16570 | Asia_W           | J2b1a      | J           | J            | 33             |
| 752 | JQ702554.1           | JQ702554.1; J1c8a1; Asia_W; 35; A73G; C150T; G185A                | 16574 | Asia_W           | J1c8a1     | J           | J            | 35             |
| 753 | JQ702555.1           | JQ702555.1; K1c2; Asia_W; 36; A73G; T146C; T152C                  | 16568 | Asia_W           | K1c2       | K           | K            | 36             |
| 754 | JQ702556.1           | JQ702556.1; T1a1; Asia_W; 36; A73G; T152C; T195C                  | 16570 | Asia_W           | T1a1       | T           | T            | 36             |
| 755 | JQ702557.1           | JQ702557.1; H1ag1b; Asia_W_Europe; 15; A235G; A263G; C309CCCT     | 16570 | Asia_W_Europe    | H1ag1b     | H           | H            | 15             |
| 756 | JQ702558.1           | JQ702558.1; W1c1; Asia_W; 37; A73G; A189G; T195C                  | 16569 | Asia_W           | W1c1       | W           | W            | 37             |
| 757 | JQ702559.1           | JQ702559.1; H1y; Asia_W_Europe; 12; A263G; C315CC; A750G          | 16569 | Asia_W_Europe    | H1y        | H           | H            | 12             |
| 758 | JQ702560.1           | JQ702560.1; H27; Asia_W_Europe; 13; A215G; A263G; C309CCCT        | 16571 | Asia_W_Europe    | H27        | H           | H            | 13             |
| 759 | JQ702561.1           | JQ702561.1; J2a1a1; Asia_W; 40; A73G; C150T; T152C                | 16570 | Asia_W           | J2a1a1     | J           | J            | 40             |
| 760 | JQ702562.1           | JQ702562.1; H; Asia_W_Europe; 10; A73G; A263G; C315CC             | 16569 | Asia_W_Europe    | H          | H           | H            | 10             |
| 761 | JQ702563.1           | JQ702563.1; J2b1; Asia_W; 32; A73G; C150T; T152C                  | 16570 | Asia_W           | J2b1       | J           | J            | 32             |
| 762 | JQ702564.1           | JQ702564.1; T2b4a; Asia_W; 35; A73G; A263G; C315CC                | 16569 | Asia_W           | T2b4a      | T           | T            | 35             |
| 763 | JQ702565.1           | JQ702565.1; H1aa1; Asia_W_Europe; 15; A263G; C309CCCT; T310C      | 16571 | Asia_W_Europe    | H1aa1      | H           | H            | 15             |
| 764 | JQ702566.1           | JQ702566.1; H1b2a; Asia_W_Europe; 17; A183G; A263G; C309CCCT      | 16571 | Asia_W_Europe    | H1b2a      | H           | H            | 17             |
| 765 | JQ702567.1           | JQ702567.1; I1; Asia_W_SW; 40; A73G; T152C; T199C                 | 16573 | Asia_W_SW        | I1         | I           | I            | 40             |
| 766 | JQ702568.1           | JQ702568.1; U5a1a2a1a; Asia_W_Europe_C; 32; A73G; A263G; C309CCCT | 16572 | Asia_W_Europe_C  | U5a1a2a1a  | U           | U5           | 32             |
| 767 | JQ702569.1           | JQ702569.1; V7a1; Europe_S; 20; T72C; A93G; A263G                 | 16570 | Europe_S         | V7a1       | V           | V            | 20             |
| 768 | JQ702570.1           | JQ702570.1; H1bo; Asia_W_Europe; 19; A263G; T267C; C315CC         | 16569 | Asia_W_Europe    | H1bo       | H           | H            | 19             |
| 769 | JQ702571.1           | JQ702571.1; H5a5; Asia_W_Europe; 16; T146C; A263G; C309CCCT       | 16570 | Asia_W_Europe    | H5a5       | H           | H            | 16             |
| 770 | JQ702572.1           | JQ702572.1; G2a1; Asia_E; 41; A73G; T152C; A263G                  | 16570 | Asia_E           | G2a1       | G           | G            | 41             |
| 771 | JQ702573.1           | JQ702573.1; X2b+226; Asia_W_America_N; 31; A73G; A153G; T195C     | 16570 | Asia_W_America_N | X2b+226    | X           | X            | 31             |
| 772 | JQ702574.1           | JQ702574.1; T2g2a; Asia_W; 40; A73G; A235G; A263G                 | 16570 | Asia_W           | T2g2a      | T           | T            | 40             |
| 773 | JQ702575.1           | JQ702575.1; H1+16189; Asia_W_Europe; 13; A263G; C309CCCT; T310C   | 16571 | Asia_W_Europe    | H1+16189   | H           | H            | 13             |
| 774 | JQ702576.1           | JQ702576.1; X2b+226; Asia_W_America_N; 29; A73G; A153G; T195C     | 16569 | Asia_W_America_N | X2b+226    | X           | X            | 29             |
| 775 | JQ702577.1           | JQ702577.1; H1u; Asia_W_Europe; 13; C151T; T152C; A263G           | 16569 | Asia_W_Europe    | H1u        | H           | H            | 13             |
| 776 | JQ702578.1           | JQ702578.1; I2e; Asia_W_SW; 36; A73G; T152C; T199C                | 16573 | Asia_W_SW        | I2e        | I           | I            | 36             |
| 777 | JQ702579.1           | JQ702579.1; H10e1; Asia_W_Europe; 13; A263G; C315CC; A750G        | 16569 | Asia_W_Europe    | H10e1      | H           | H            | 13             |
| 778 | JQ702580.1           | JQ702580.1; H4b; Asia_W_Europe; 15; A263G; C309CCCT; T310C        | 16569 | Asia_W_Europe    | H4b        | H           | H            | 15             |
| 779 | JQ702581.1           | JQ702581.1; J1c2; Asia_W; 32; A73G; G185A; A188G                  | 16571 | Asia_W           | J1c2       | J           | J            | 32             |

**Supplementary Table S3** Human mitochondrial database (hMITO DB v1.0) metadata

| Row | Name (accession no.) | Description                                                        | Size  | Geo_Region          | Haplogroup    | Macro_ Haplo | Macro_ Haplo2 | Total Variants |
|-----|----------------------|--------------------------------------------------------------------|-------|---------------------|---------------|--------------|---------------|----------------|
| 780 | JQ702582.1           | JQ702582.1; H13a1a1a; Asia_W_Europe; 18; A263G; C309CCCT; T310C    | 16570 | Asia_W_Europe       | H13a1a1a      | H            | H             | 18             |
| 781 | JQ702583.1           | JQ702583.1; H5m; Asia_W_Europe; 13; T146C; A263G; C315CC           | 16571 | Asia_W_Europe       | H5m           | H            | H             | 13             |
| 782 | JQ702584.1           | JQ702584.1; H1bb; Asia_W_Europe; 13; T152C; A263G; C315CC          | 16571 | Asia_W_Europe       | H1bb          | H            | H             | 13             |
| 783 | JQ702585.1           | JQ702585.1; U5b2b4; Asia_W_Europe_C; 31; A73G; C150T; A263G        | 16571 | Asia_W_Europe_C     | U5b2b4        | U            | U5            | 31             |
| 784 | JQ702586.1           | JQ702586.1; K1a9; Asia_W; 34; A73G; T152C; T195C                   | 16569 | Asia_W              | K1a9          | K            | K             | 34             |
| 785 | JQ702587.1           | JQ702587.1; U5b1b1+@16192; Asia_W_Europe_C; 32; A73G; C150T; T152C | 16570 | Asia_W_Europe_C     | U5b1b1+@16192 | U            | U5            | 32             |
| 786 | JQ702588.1           | JQ702588.1; U5b2a1a1; Asia_W_Europe_C; 29; A73G; C150T; A263G      | 16569 | Asia_W_Europe_C     | U5b2a1a1      | U            | U5            | 29             |
| 787 | JQ702589.1           | JQ702589.1; H79a; Asia_W_Europe; 11; A263G; C315CC; A750G          | 16569 | Asia_W_Europe       | H79a          | H            | H             | 11             |
| 788 | JQ702590.1           | JQ702590.1; H1bs; Asia_W_Europe; 16; A93G; A263G; C309CCCT         | 16570 | Asia_W_Europe       | H1bs          | H            | H             | 16             |
| 789 | JQ702591.1           | JQ702591.1; H1aj1a; Asia_W_Europe; 19; T204C; G207A; A263G         | 16569 | Asia_W_Europe       | H1aj1a        | H            | H             | 19             |
| 790 | JQ702592.1           | JQ702592.1; A2ab; Asia_NE_America_N; 37; C64T; A73G; T146C         | 16568 | Asia_NE_America_N   | A2ab          | A            | A             | 37             |
| 791 | JQ702593.1           | JQ702593.1; J2b1a; Asia_W; 34; A73G; C150T; T152C                  | 16571 | Asia_W              | J2b1a         | J            | J             | 34             |
| 792 | JQ702594.1           | JQ702594.1; T2a1a; Asia_W; 38; A73G; A263G; A297G                  | 16569 | Asia_W              | T2a1a         | T            | T             | 38             |
| 793 | JQ702595.1           | JQ702595.1; C1b5b; Asia_NE_America_N_S; 45; A73G; A249d; A263G     | 16564 | Asia_NE_America_N_S | C1b5b         | C            | C             | 45             |
| 794 | JQ702596.1           | JQ702596.1; HV17a; Asia_W; 16; A263G; C315CC; C549T                | 16569 | Asia_W              | HV17a         | HV           | HV            | 16             |
| 795 | JQ702597.1           | JQ702597.1; H1e1a; Asia_W_Europe; 17; A263G; C315CC; C520T         | 16570 | Asia_W_Europe       | H1e1a         | H            | H             | 17             |
| 796 | JQ702598.1           | JQ702598.1; H1a; Asia_W_Europe; 13; A73G; T146C; A263G             | 16569 | Asia_W_Europe       | H1a           | H            | H             | 13             |
| 797 | JQ702599.1           | JQ702599.1; H10e3a; Asia_W_Europe; 13; A263G; C309CCCT; T310C      | 16570 | Asia_W_Europe       | H10e3a        | H            | H             | 13             |
| 798 | JQ702600.1           | JQ702600.1; L1c3b1b; Africa_C; 86; A73G; C151T; T152C              | 16566 | Africa_C            | L1c3b1b       | L1           | L1            | 86             |
| 799 | JQ702601.1           | JQ702601.1; H7b; Asia_W_Europe; 12; T152C; A263G; C315CC           | 16569 | Asia_W_Europe       | H7b           | H            | H             | 12             |
| 800 | JQ702602.1           | JQ702602.1; H1a1a; Asia_W_Europe; 15; A73G; A263G; C315CC          | 16569 | Asia_W_Europe       | H1a1a         | H            | H             | 15             |
| 801 | JQ702603.1           | JQ702603.1; H3c3; Asia_W_Europe; 15; G260A; A263G; C315CC          | 16569 | Asia_W_Europe       | H3c3          | H            | H             | 15             |
| 802 | JQ702604.1           | JQ702604.1; T2b4c; Asia_W; 38; A73G; T152C; A263G                  | 16570 | Asia_W              | T2b4c         | T            | T             | 38             |
| 803 | JQ702605.1           | JQ702605.1; J2a1a1e; Asia_W; 42; A73G; C150T; T152C                | 16567 | Asia_W              | J2a1a1e       | J            | J             | 42             |
| 804 | JQ702606.1           | JQ702606.1; H6a1a10; Asia_W_Europe; 19; T239C; A263G; C309CCCT     | 16571 | Asia_W_Europe       | H6a1a10       | H            | H             | 19             |
| 805 | JQ702607.1           | JQ702607.1; H1c20; Asia_W_Europe; 14; A263G; C309CCCT; T310C       | 16570 | Asia_W_Europe       | H1c20         | H            | H             | 14             |
| 806 | JQ702608.1           | JQ702608.1; H1e4a; Asia_W_Europe; 13; A263G; C315CC; A750G         | 16569 | Asia_W_Europe       | H1e4a         | H            | H             | 13             |
| 807 | JQ702609.1           | JQ702609.1; J1c13; Asia_W; 32; A73G; G185A; A189G                  | 16569 | Asia_W              | J1c13         | J            | J             | 32             |
| 808 | JQ702610.1           | JQ702610.1; K1a4a1b; Asia_W; 44; A73G; T152C; A263G                | 16574 | Asia_W              | K1a4a1b       | K            | K             | 44             |
| 809 | JQ702611.1           | JQ702611.1; T2a1a; Asia_W; 36; A73G; A263G; C309CCCT               | 16570 | Asia_W              | T2a1a         | T            | T             | 36             |
| 810 | JQ702612.1           | JQ702612.1; U6a1a1; Asia_SW_Africa_N; 31; A73G; A263G; C309CCCT    | 16570 | Asia_SW_Africa_N    | U6a1a1        | U            | U6            | 31             |
| 811 | JQ702613.1           | JQ702613.1; H4a1a2a1; Asia_W_Europe; 20; A263G; C315CC; CA522d     | 16567 | Asia_W_Europe       | H4a1a2a1      | H            | H             | 20             |
| 812 | JQ702614.1           | JQ702614.1; H5c1; Asia_W_Europe; 12; A263G; C309CCCT; T310C        | 16570 | Asia_W_Europe       | H5c1          | H            | H             | 12             |
| 813 | JQ702615.1           | JQ702615.1; H5a3a; Asia_W_Europe; 16; A263G; C309CCCT; T310C       | 16570 | Asia_W_Europe       | H5a3a         | H            | H             | 16             |
| 814 | JQ702616.1           | JQ702616.1; X2c1a; Asia_W_America_N; 33; A73G; A153G; T195C        | 16570 | Asia_W_America_N    | X2c1a         | X            | X             | 33             |
| 815 | JQ702617.1           | JQ702617.1; L1c5; Africa_C; 85; A73G; C151T; T152C                 | 16558 | Africa_C            | L1c5          | L1           | L1            | 85             |
| 816 | JQ702618.1           | JQ702618.1; K1c1; Asia_W; 35; A73G; T146C; T152C                   | 16570 | Asia_W              | K1c1          | K            | K             | 35             |
| 817 | JQ702619.1           | JQ702619.1; HV0a1a; Asia_W; 23; T72C; A200G; A263G                 | 16569 | Asia_W              | HV0a1a        | HV           | HV            | 23             |
| 818 | JQ702620.1           | JQ702620.1; J1c1a; Asia_W; 34; A73G; A93G; A210G                   | 16569 | Asia_W              | J1c1a         | J            | J             | 34             |
| 819 | JQ702621.1           | JQ702621.1; H2; Asia_W_Europe; 14; A263G; C309CCCT; T310C          | 16570 | Asia_W_Europe       | H2            | H            | H             | 14             |
| 820 | JQ702622.1           | JQ702622.1; J2a1a1a2; Asia_W; 43; A73G; C150T; T152C               | 16570 | Asia_W              | J2a1a1a2      | J            | J             | 43             |

**Supplementary Table S3** Human mitochondrial database (hMITO DB v1.0) metadata

| Row | Name (accession no.) | Description                                                      | Size  | Geo_Region            | Haplogroup | Macro_Haplo | Macro_Haplo2 | Total Variants |
|-----|----------------------|------------------------------------------------------------------|-------|-----------------------|------------|-------------|--------------|----------------|
| 821 | JQ702623.1           | JQ702623.1; H1ak; Asia_W_Europe; 11; A263G; C309CCCT; T310C      | 16571 | Asia_W_Europe         | H1ak       | H           | H            | 11             |
| 822 | JQ702624.1           | JQ702624.1; K1a1b2b; Asia_W; 39; A73G; A189G; T199C              | 16569 | Asia_W                | K1a1b2b    | K           | K            | 39             |
| 823 | JQ702625.1           | JQ702625.1; U5b2c2a; Asia_W_Europe_C; 34; A73G; C150T; T195C     | 16571 | Asia_W_Europe_C       | U5b2c2a    | U           | U5           | 34             |
| 824 | JQ702626.1           | JQ702626.1; L2b3a; Africa_W_C; 73; A73G; T146C; C150T            | 16570 | Africa_W_C            | L2b3a      | L2          | L2           | 73             |
| 825 | JQ702627.1           | JQ702627.1; H14b; Asia_W_Europe; 14; G143A; T152C; A263G         | 16569 | Asia_W_Europe         | H14b       | H           | H            | 14             |
| 826 | JQ702628.1           | JQ702628.1; H1bb; Asia_W_Europe; 13; T152C; A263G; C315CC        | 16569 | Asia_W_Europe         | H1bb       | H           | H            | 13             |
| 827 | JQ702629.1           | JQ702629.1; H3; Asia_W_Europe; 16; T195C; A263G; C315CC          | 16570 | Asia_W_Europe         | H3         | H           | H            | 16             |
| 828 | JQ702630.1           | JQ702630.1; J1c3b2; Asia_W; 29; A73G; G185A; A263G               | 16569 | Asia_W                | J1c3b2     | J           | J            | 29             |
| 829 | JQ702631.1           | JQ702631.1; H4a1c1a; Asia_W_Europe; 17; A263G; C315CC; CA522d    | 16567 | Asia_W_Europe         | H4a1c1a    | H           | H            | 17             |
| 830 | JQ702632.1           | JQ702632.1; K1c2; Asia_W; 36; A73G; T146C; T152C                 | 16568 | Asia_W                | K1c2       | K           | K            | 36             |
| 831 | JQ702633.1           | JQ702633.1; X2c1e; Asia_W_America_N; 31; A73G; A153G; T195C      | 16569 | Asia_W_America_N      | X2c1e      | X           | X            | 31             |
| 832 | JQ702634.1           | JQ702634.1; H1bc; Asia_W_Europe; 16; T152C; A263G; C315CC        | 16571 | Asia_W_Europe         | H1bc       | H           | H            | 16             |
| 833 | JQ702635.1           | JQ702635.1; H3h7; Asia_W_Europe; 15; A93G; A263G; C309CCCT       | 16571 | Asia_W_Europe         | H3h7       | H           | H            | 15             |
| 834 | JQ702636.1           | JQ702636.1; K1b2a2a; Asia_W; 37; A73G; T146C; T195C              | 16573 | Asia_W                | K1b2a2a    | K           | K            | 37             |
| 835 | JQ702637.1           | JQ702637.1; V1a1; Europe_S; 17; A263G; C309CCCT; T310C           | 16571 | Europe_S              | V1a1       | V           | V            | 17             |
| 836 | JQ702638.1           | JQ702638.1; W1e1a; Asia_W; 37; A73G; A189G; T195C                | 16569 | Asia_W                | W1e1a      | W           | W            | 37             |
| 837 | JQ702639.1           | JQ702639.1; H1a3a; Asia_W_Europe; 15; A73G; A263G; C315CC        | 16569 | Asia_W_Europe         | H1a3a      | H           | H            | 15             |
| 838 | JQ702640.1           | JQ702640.1; K2a7; Asia_W; 36; A73G; T146C; T152C                 | 16569 | Asia_W                | K2a7       | K           | K            | 36             |
| 839 | JQ702641.1           | JQ702641.1; H10e1; Asia_W_Europe; 12; A263G; C315CC; A750G       | 16569 | Asia_W_Europe         | H10e1      | H           | H            | 12             |
| 840 | JQ702642.1           | JQ702642.1; T2f1a1; Asia_W; 42; A73G; T195C; A263G               | 16560 | Asia_W                | T2f1a1     | T           | T            | 42             |
| 841 | JQ702643.1           | JQ702643.1; T1a1f; Asia_W; 36; A73G; T152C; T195C                | 16570 | Asia_W                | T1a1f      | T           | T            | 36             |
| 842 | JQ702644.1           | JQ702644.1; H15a1; Asia_W_Europe; 13; T55C; T57C; A263G          | 16569 | Asia_W_Europe         | H15a1      | H           | H            | 13             |
| 843 | JQ702645.1           | JQ702645.1; T2b; Asia_W; 34; A73G; A263G; C315CC                 | 16569 | Asia_W                | T2b        | T           | T            | 34             |
| 844 | JQ702646.1           | JQ702646.1; J1c3a1; Asia_W; 32; A73G; G228A; A263G               | 16579 | Asia_W                | J1c3a1     | J           | J            | 32             |
| 845 | JQ702647.1           | JQ702647.1; I3d1; Asia_W_SW; 42; A73G; T152C; A183G              | 16579 | Asia_W_SW             | I3d1       | I           | I            | 42             |
| 846 | JQ702648.1           | JQ702648.1; B2d; Asia_SE_E_America_N_S; 35; A73G; A263G; C309CCT | 16560 | Asia_SE_E_America_N_S | B2d        | B           | B            | 35             |
| 847 | JQ702649.1           | JQ702649.1; H1e1b1a; Asia_W_Europe; 15; A263G; C309CCCT; T310C   | 16571 | Asia_W_Europe         | H1e1b1a    | H           | H            | 15             |
| 848 | JQ702650.1           | JQ702650.1; H1a3a; Asia_W_Europe; 15; A73G; T146C; A263G         | 16570 | Asia_W_Europe         | H1a3a      | H           | H            | 15             |
| 849 | JQ702651.1           | JQ702651.1; C1b8; Asia_NE_America_N_S; 52; A73G; G143A; T195C    | 16565 | Asia_NE_America_N_S   | C1b8       | C           | C            | 52             |
| 850 | JQ702652.1           | JQ702652.1; H3+16311; Asia_W_Europe; 12; A263G; C315CC; A750G    | 16569 | Asia_W_Europe         | H3+16311   | H           | H            | 12             |
| 851 | JQ702653.1           | JQ702653.1; H5a1c1a; Asia_W_Europe; 18; A263G; C315CC; C456T     | 16567 | Asia_W_Europe         | H5a1c1a    | H           | H            | 18             |
| 852 | JQ702654.1           | JQ702654.1; U2e1; Asia_S_W_Europe; 41; A73G; T152C; A200G        | 16573 | Asia_S_W_Europe       | U2e1       | U           | U2           | 41             |
| 853 | JQ702655.1           | JQ702655.1; I1c1a; Asia_W_SW; 44; A73G; T199C; T204C             | 16572 | Asia_W_SW             | I1c1a      | I           | I            | 44             |
| 854 | JQ702656.1           | JQ702656.1; H5a6a; Asia_W_Europe; 17; T152C; A263G; C315CC       | 16569 | Asia_W_Europe         | H5a6a      | H           | H            | 17             |
| 855 | JQ702657.1           | JQ702657.1; H1q1a; Asia_W_Europe; 13; A263G; C315CC; A750G       | 16569 | Asia_W_Europe         | H1q1a      | H           | H            | 13             |
| 856 | JQ702658.1           | JQ702658.1; H13a1a; Asia_W_Europe; 13; A263G; C309CCCT; T310C    | 16571 | Asia_W_Europe         | H13a1a     | H           | H            | 13             |
| 857 | JQ702659.1           | JQ702659.1; L2a1c6; Africa_W_C; 58; A73G; G143A; T146C           | 16568 | Africa_W_C            | L2a1c6     | L2          | L2           | 58             |
| 858 | JQ702660.1           | JQ702660.1; H4a1a4b; Asia_W_Europe; 20; T195C; A263G; C315CC     | 16568 | Asia_W_Europe         | H4a1a4b    | H           | H            | 20             |
| 859 | JQ702661.1           | JQ702661.1; B2g2; Asia_SE_E_America_N_S; 37; G9A; A73G; C114G    | 16560 | Asia_SE_E_America_N_S | B2g2       | B           | B            | 37             |
| 860 | JQ702662.1           | JQ702662.1; H34; Asia_W_Europe; 13; T152C; A263G; C315CC         | 16569 | Asia_W_Europe         | H34        | H           | H            | 13             |
| 861 | JQ702663.1           | JQ702663.1; U2e1b1; Asia_S_W_Europe; 38; A73G; T152C; T217C      | 16569 | Asia_S_W_Europe       | U2e1b1     | U           | U2           | 38             |

**Supplementary Table S3** Human mitochondrial database (hMITO DB v1.0) metadata

| Row | Name (accession no.) | Description                                                          | Size  | Geo_Region            | Haplogroup  | Macro_Haplo | Macro_Haplo2 | Total Variants |
|-----|----------------------|----------------------------------------------------------------------|-------|-----------------------|-------------|-------------|--------------|----------------|
| 862 | JQ702664.1           | JQ702664.1; M7c1c; Asia_E_SE; 43; A73G; T146C; T152C                 | 16568 | Asia_E_SE             | M7c1c       | M           | M7           | 43             |
| 863 | JQ702665.1           | JQ702665.1; K1a1b2a1a; Asia_W; 42; A73G; T152C; A263G                | 16571 | Asia_W                | K1a1b2a1a   | K           | K            | 42             |
| 864 | JQ702666.1           | JQ702666.1; T2b5; Asia_W; 38; A73G; A93G; A263G                      | 16570 | Asia_W                | T2b5        | T           | T            | 38             |
| 865 | JQ702667.1           | JQ702667.1; V3a1; Europe_S; 17; T72C; A263G; C315CC                  | 16569 | Europe_S              | V3a1        | V           | V            | 17             |
| 866 | JQ702668.1           | JQ702668.1; B2a1a1; Asia_SE_E_America_N_S; 31; A73G; A263G; C309CCCT | 16562 | Asia_SE_E_America_N_S | B2a1a1      | B           | B            | 31             |
| 867 | JQ702669.1           | JQ702669.1; V13; Europe_S; 18; T72C; A263G; C309CCCT                 | 16571 | Europe_S              | V13         | V           | V            | 18             |
| 868 | JQ702670.1           | JQ702670.1; H5a1h; Asia_W_Europe; 13; A263G; C315CC; C456T           | 16567 | Asia_W_Europe         | H5a1h       | H           | H            | 13             |
| 869 | JQ702671.1           | JQ702671.1; K1a1b1a; Asia_W; 39; A73G; C114T; A263G                  | 16571 | Asia_W                | K1a1b1a     | K           | K            | 39             |
| 870 | JQ702672.1           | JQ702672.1; K2b1b; Asia_W; 39; A73G; T146C; T195C                    | 16570 | Asia_W                | K2b1b       | K           | K            | 39             |
| 871 | JQ702673.1           | JQ702673.1; R1a1a2; Asia_S_SE; 38; A73G; A263G; C295A                | 16573 | Asia_S_SE             | R1a1a2      | R           | R1           | 38             |
| 872 | JQ702674.1           | JQ702674.1; K1a15; Asia_W; 34; A73G; A93G; T195C                     | 16573 | Asia_W                | K1a15       | K           | K            | 34             |
| 873 | JQ702675.1           | JQ702675.1; K1a11a; Asia_W; 39; A16T; A73G; C150T                    | 16561 | Asia_W                | K1a11a      | K           | K            | 39             |
| 874 | JQ702676.1           | JQ702676.1; K1a1b1a; Asia_W; 36; A73G; A263G; C315CC                 | 16569 | Asia_W                | K1a1b1a     | K           | K            | 36             |
| 875 | JQ702677.1           | JQ702677.1; U3a1b; Africa_NE_Asia_W; 31; A73G; C150T; A263G          | 16570 | Africa_NE_Asia_W      | U3a1b       | U           | U3           | 31             |
| 876 | JQ702678.1           | JQ702678.1; R0a1; Africa_NE_Asia_W; 30; C64T; A189G; T204C           | 16569 | Africa_NE_Asia_W      | R0a1        | R           | R0           | 30             |
| 877 | JQ702679.1           | JQ702679.1; H1c7; Asia_W_Europe; 12; A263G; C315CC; T477C            | 16573 | Asia_W_Europe         | H1c7        | H           | H            | 12             |
| 878 | JQ702680.1           | JQ702680.1; T1a1h; Asia_W; 37; A73G; T152C; T195C                    | 16571 | Asia_W                | T1a1h       | T           | T            | 37             |
| 879 | JQ702681.1           | JQ702681.1; U3a1b; Africa_NE_Asia_W; 30; A73G; C150T; A263G          | 16569 | Africa_NE_Asia_W      | U3a1b       | U           | U3           | 30             |
| 880 | JQ702682.1           | JQ702682.1; H; Asia_W_Europe; 11; A263G; C315CC; A750G               | 16569 | Asia_W_Europe         | H           | H           | H            | 11             |
| 881 | JQ702683.1           | JQ702683.1; H1c; Asia_W_Europe; 13; T195C; A263G; C315CC             | 16569 | Asia_W_Europe         | H1c         | H           | H            | 13             |
| 882 | JQ702684.1           | JQ702684.1; J1b2; Asia_W; 32; A73G; C150T; T152C                     | 16569 | Asia_W                | J1b2        | J           | J            | 32             |
| 883 | JQ702685.1           | JQ702685.1; J1c1; Asia_W; 32; A73G; G185A; G228A                     | 16572 | Asia_W                | J1c1        | J           | J            | 32             |
| 884 | JQ702686.1           | JQ702686.1; J1c3e2; Asia_W; 33; A73G; G185A; G228A                   | 16570 | Asia_W                | J1c3e2      | J           | J            | 33             |
| 885 | JQ702687.1           | JQ702687.1; H3ar; Asia_W_Europe; 13; A263G; C309CCT; T310C           | 16570 | Asia_W_Europe         | H3ar        | H           | H            | 13             |
| 886 | JQ702688.1           | JQ702688.1; U5b2c2b; Asia_W_Europe_C; 36; A73G; C150T; T195C         | 16571 | Asia_W_Europe_C       | U5b2c2b     | U           | U5           | 36             |
| 887 | JQ702689.1           | JQ702689.1; V21; Europe_S; 16; A263G; C309CCT; T310C                 | 16572 | Europe_S              | V21         | V           | V            | 16             |
| 888 | JQ702690.1           | JQ702690.1; U4c2a; Asia_N_Europe_N; 32; A73G; C150T; T195C           | 16569 | Asia_N_Europe_N       | U4c2a       | U           | U4           | 32             |
| 889 | JQ702691.1           | JQ702691.1; J1c3; Asia_W; 28; A73G; G185A; G228A                     | 16569 | Asia_W                | J1c3        | J           | J            | 28             |
| 890 | JQ702692.1           | JQ702692.1; H4a1c1a; Asia_W_Europe; 19; A263G; C315CC; CA522d        | 16567 | Asia_W_Europe         | H4a1c1a     | H           | H            | 19             |
| 891 | JQ702693.1           | JQ702693.1; K1a3a2; Asia_W; 38; A73G; A263G; C309CCT                 | 16570 | Asia_W                | K1a3a2      | K           | K            | 38             |
| 892 | JQ702694.1           | JQ702694.1; L2b1a3; Africa_W_C; 73; A73G; C150T; T152C               | 16568 | Africa_W_C            | L2b1a3      | L2          | L2           | 73             |
| 893 | JQ702695.1           | JQ702695.1; J1b1a1a; Asia_W; 39; A73G; C242T; A263G                  | 16569 | Asia_W                | J1b1a1a     | J           | J            | 39             |
| 894 | JQ702696.1           | JQ702696.1; U5a1a1c; Asia_W_Europe_C; 28; A73G; A263G; C315CC        | 16569 | Asia_W_Europe_C       | U5a1a1c     | U           | U5           | 28             |
| 895 | JQ702697.1           | JQ702697.1; H31b; Asia_W_Europe; 15; T195C; A263G; C315CC            | 16569 | Asia_W_Europe         | H31b        | H           | H            | 15             |
| 896 | JQ702698.1           | JQ702698.1; H1a3c; Asia_W_Europe; 13; A73G; A263G; C315CC            | 16569 | Asia_W_Europe         | H1a3c       | H           | H            | 13             |
| 897 | JQ702699.1           | JQ702699.1; HV0e; Asia_W; 18; T72C; T195C; T204C                     | 16570 | Asia_W                | HV0e        | HV          | HV           | 18             |
| 898 | JQ702700.1           | JQ702700.1; K1a4a1a+195; Asia_W; 37; A73G; T195C; A263G              | 16573 | Asia_W                | K1a4a1a+195 | K           | K            | 37             |
| 899 | JQ702701.1           | JQ702701.1; H1as; Asia_W_Europe; 11; A263G; C309CCT; T310C           | 16570 | Asia_W_Europe         | H1as        | H           | H            | 11             |
| 900 | JQ702702.1           | JQ702702.1; J2b1a3; Asia_W; 35; A73G; C150T; T152C                   | 16570 | Asia_W                | J2b1a3      | J           | J            | 35             |
| 901 | JQ702703.1           | JQ702703.1; H1b; Asia_W_Europe; 15; A263G; C309CCCT; T310C           | 16571 | Asia_W_Europe         | H1b         | H           | H            | 15             |
| 902 | JQ702704.1           | JQ702704.1; T2; Asia_W; 32; A73G; A263G; C315CC                      | 16569 | Asia_W                | T2          | T           | T            | 32             |

**Supplementary Table S3** Human mitochondrial database (hMITO DB v1.0) metadata

| Row | Name (accession no.) | Description                                                           | Size  | Geo_Region       | Haplogroup   | Macro_Haplo | Macro_Haplo2 | Total Variants |
|-----|----------------------|-----------------------------------------------------------------------|-------|------------------|--------------|-------------|--------------|----------------|
| 903 | JQ702705.1           | JQ702705.1; K1a3; Asia_W; 33; A73G; A263G; C315CC                     | 16571 | Asia_W           | K1a3         | K           | K            | 33             |
| 904 | JQ702706.1           | JQ702706.1; J1c2b3; Asia_W; 34; T59C; A73G; G185A                     | 16569 | Asia_W           | J1c2b3       | J           | J            | 34             |
| 905 | JQ702707.1           | JQ702707.1; H28a; Asia_W_Europe; 13; C186A; A263G; C315CC             | 16569 | Asia_W_Europe    | H28a         | H           | H            | 13             |
| 906 | JQ702708.1           | JQ702708.1; H6a1b2; Asia_W_Europe; 16; T239C; A263G; C315CC           | 16569 | Asia_W_Europe    | H6a1b2       | H           | H            | 16             |
| 907 | JQ702709.1           | JQ702709.1; H1b1+16362; Asia_W_Europe; 14; A263G; C315CC; CA522d      | 16567 | Asia_W_Europe    | H1b1+16362   | H           | H            | 14             |
| 908 | JQ702710.1           | JQ702710.1; T2g2a; Asia_W; 39; A73G; A235G; A263G                     | 16570 | Asia_W           | T2g2a        | T           | T            | 39             |
| 909 | JQ702711.1           | JQ702711.1; U5b2a1b; Asia_W_Europe_C; 31; A73G; C150T; T152C          | 16569 | Asia_W_Europe_C  | U5b2a1b      | U           | U5           | 31             |
| 910 | JQ702712.1           | JQ702712.1; U5b2a1a2; Asia_W_Europe_C; 33; A73G; C150T; A263G         | 16572 | Asia_W_Europe_C  | U5b2a1a2     | U           | U5           | 33             |
| 911 | JQ702713.1           | JQ702713.1; U5b2b; Asia_W_Europe_C; 28; A73G; C150T; A263G            | 16569 | Asia_W_Europe_C  | U5b2b        | U           | U5           | 28             |
| 912 | JQ702714.1           | JQ702714.1; U5a1b1h; Asia_W_Europe_C; 28; A73G; A263G; C315CC         | 16567 | Asia_W_Europe_C  | U5a1b1h      | U           | U5           | 28             |
| 913 | JQ702715.1           | JQ702715.1; J1c2; Asia_W; 32; A73G; G185A; A188G                      | 16570 | Asia_W           | J1c2         | J           | J            | 32             |
| 914 | JQ702716.1           | JQ702716.1; T1a1; Asia_W; 37; A73G; T152C; T195C                      | 16570 | Asia_W           | T1a1         | T           | T            | 37             |
| 915 | JQ702717.1           | JQ702717.1; K1a24a; Asia_W; 37; A73G; C150T; T195C                    | 16568 | Asia_W           | K1a24a       | K           | K            | 37             |
| 916 | JQ702718.1           | JQ702718.1; N1b1a6; Africa_NE_Asia_W; 38; A73G; T152C; A263G          | 16567 | Africa_NE_Asia_W | N1b1a6       | N           | N1           | 38             |
| 917 | JQ702719.1           | JQ702719.1; H1ae2; Asia_W_Europe; 16; A263G; C315CC; A750G            | 16569 | Asia_W_Europe    | H1ae2        | H           | H            | 16             |
| 918 | JQ702720.1           | JQ702720.1; U5b2b1a1; Asia_W_Europe_C; 34; A73G; C150T; A263G         | 16570 | Asia_W_Europe_C  | U5b2b1a1     | U           | U5           | 34             |
| 919 | JQ702721.1           | JQ702721.1; V19; Europe_S; 16; T72C; C150T; A263G                     | 16570 | Europe_S         | V19          | V           | V            | 16             |
| 920 | JQ702722.1           | JQ702722.1; K1c1g; Asia_W; 35; A73G; T146C; T152C                     | 16568 | Asia_W           | K1c1g        | K           | K            | 35             |
| 921 | JQ702723.1           | JQ702723.1; V10a; Europe_S; 18; T72C; A263G; C309CCT                  | 16570 | Europe_S         | V10a         | V           | V            | 18             |
| 922 | JQ702724.1           | JQ702724.1; J1c2m1; Asia_W; 34; A73G; G185A; A188G                    | 16570 | Asia_W           | J1c2m1       | J           | J            | 34             |
| 923 | JQ702725.1           | JQ702725.1; H6a1b3a; Asia_W_Europe; 19; T204C; T239C; A263G           | 16570 | Asia_W_Europe    | H6a1b3a      | H           | H            | 19             |
| 924 | JQ702726.1           | JQ702726.1; H1u; Asia_W_Europe; 13; A263G; C315CC; A750G              | 16569 | Asia_W_Europe    | H1u          | H           | H            | 13             |
| 925 | JQ702727.1           | JQ702727.1; J1c3c2; Asia_W; 30; A73G; G185A; G228A                    | 16569 | Asia_W           | J1c3c2       | J           | J            | 30             |
| 926 | JQ702728.1           | JQ702728.1; T1a1k; Asia_W; 36; A73G; T152C; T195C                     | 16570 | Asia_W           | T1a1k        | T           | T            | 36             |
| 927 | JQ702729.1           | JQ702729.1; H+152; Asia_W_Europe; 13; T152C; A263G; C315CC            | 16569 | Asia_W_Europe    | H+152        | H           | H            | 13             |
| 928 | JQ702730.1           | JQ702730.1; U5a1a1; Asia_W_Europe_C; 27; A73G; A263G; C315CC          | 16569 | Asia_W_Europe_C  | U5a1a1       | U           | U5           | 27             |
| 929 | JQ702731.1           | JQ702731.1; T2e1; Asia_W; 40; C41T; A73G; C150T                       | 16570 | Asia_W           | T2e1         | T           | T            | 40             |
| 930 | JQ702732.1           | JQ702732.1; K1a1b1; Asia_W; 34; A73G; A263G; C315CC                   | 16569 | Asia_W           | K1a1b1       | K           | K            | 34             |
| 931 | JQ702733.1           | JQ702733.1; H3+152; Asia_W_Europe; 14; T152C; A263G; C315CC           | 16571 | Asia_W_Europe    | H3+152       | H           | H            | 14             |
| 932 | JQ702734.1           | JQ702734.1; X2c1a; Asia_W_America_N; 31; A73G; A153G; T195C           | 16569 | Asia_W_America_N | X2c1a        | X           | X            | 31             |
| 933 | JQ702735.1           | JQ702735.1; U5a1f1a1; Asia_W_Europe_C; 32; A73G; T199C; A263G         | 16569 | Asia_W_Europe_C  | U5a1f1a1     | U           | U5           | 32             |
| 934 | JQ702736.1           | JQ702736.1; H4a1a; Asia_W_Europe; 18; A263G; C309CCT; T310C           | 16568 | Asia_W_Europe    | H4a1a        | H           | H            | 18             |
| 935 | JQ702737.1           | JQ702737.1; T2b9; Asia_W; 37; A73G; C150T; A263G                      | 16569 | Asia_W           | T2b9         | T           | T            | 37             |
| 936 | JQ702738.1           | JQ702738.1; H1c3; Asia_W_Europe; 15; T195C; A257G; A263G              | 16570 | Asia_W_Europe    | H1c3         | H           | H            | 15             |
| 937 | JQ702739.1           | JQ702739.1; X2d1; Asia_W_America_N; 34; A73G; T195C; T204C            | 16567 | Asia_W_America_N | X2d1         | X           | X            | 34             |
| 938 | JQ702740.1           | JQ702740.1; K1a10; Asia_W; 35; A73G; T195C; A263G                     | 16573 | Asia_W           | K1a10        | K           | K            | 35             |
| 939 | JQ702741.1           | JQ702741.1; J1c2c2; Asia_W; 34; A73G; T146C; G185A                    | 16569 | Asia_W           | J1c2c2       | J           | J            | 34             |
| 940 | JQ702742.1           | JQ702742.1; J1c2a3; Asia_W; 33; A73G; G185A; A188G                    | 16570 | Asia_W           | J1c2a3       | J           | J            | 33             |
| 941 | JQ702743.1           | JQ702743.1; U5b1+16189+@16192; Asia_W_Europe_C; 31; T60TT; G71d; A73G | 16571 | Asia_W_Europe_C  | U5b1+16189+@ | U           | U5           | 31             |
| 942 | JQ702744.1           | JQ702744.1; K1a4a1; Asia_W; 34; A73G; C150T; A263G                    | 16569 | Asia_W           | K1a4a1       | K           | K            | 34             |
| 943 | JQ702745.1           | JQ702745.1; K1b1a1; Asia_W; 39; A73G; T152C; A263G                    | 16570 | Asia_W           | K1b1a1       | K           | K            | 39             |

**Supplementary Table S3** Human mitochondrial database (hMITO DB v1.0) metadata

| Row | Name (accession no.) | Description                                                  | Size  | Geo_Region        | Haplogroup | Macro_Haplo | Macro_Haplo2 | Total Variants |
|-----|----------------------|--------------------------------------------------------------|-------|-------------------|------------|-------------|--------------|----------------|
| 944 | JQ702746.1           | JQ702746.1; U5a2b1; Asia_W_Europe_C; 26; A73G; A263G; C315CC | 16570 | Asia_W_Europe_C   | U5a2b1     | U           | U5           | 26             |
| 945 | JQ702747.1           | JQ702747.1; J1c3a1; Asia_W; 32; A73G; G228A; A263G           | 16570 | Asia_W            | J1c3a1     | J           | J            | 32             |
| 946 | JQ702748.1           | JQ702748.1; K1a2a1; Asia_W; 35; A73G; A263G; C309CCCT        | 16571 | Asia_W            | K1a2a1     | K           | K            | 35             |
| 947 | JQ702749.1           | JQ702749.1; W5a1a; Asia_W; 42; A73G; T152C; A189G            | 16570 | Asia_W            | W5a1a      | W           | W            | 42             |
| 948 | JQ702750.1           | JQ702750.1; A2aa; Asia_NE_America_N; 38; C64T; A73G; T146C   | 16568 | Asia_NE_America_N | A2aa       | A           | A            | 38             |
| 949 | JQ702751.1           | JQ702751.1; H1a; Asia_W_Europe; 14; A73G; T146C; A263G       | 16569 | Asia_W_Europe     | H1a        | H           | H            | 14             |
| 950 | JQ702752.1           | JQ702752.1; K1b1a1b; Asia_W; 44; A73G; T152C; T199C          | 16570 | Asia_W            | K1b1a1b    | K           | K            | 44             |
| 951 | JQ702753.1           | JQ702753.1; H1a3a; Asia_W_Europe; 15; A73G; A263G; C309CCCT  | 16570 | Asia_W_Europe     | H1a3a      | H           | H            | 15             |
| 952 | JQ702754.1           | JQ702754.1; K2b1a1; Asia_W; 36; A73G; T146C; A263G           | 16569 | Asia_W            | K2b1a1     | K           | K            | 36             |
| 953 | JQ702755.1           | JQ702755.1; K1a1b1a; Asia_W; 37; A73G; C114T; A263G          | 16569 | Asia_W            | K1a1b1a    | K           | K            | 37             |
| 954 | JQ702756.1           | JQ702756.1; H4a1a1a; Asia_W_Europe; 19; A73G; T146C; A263G   | 16568 | Asia_W_Europe     | H4a1a1a    | H           | H            | 19             |
| 955 | JQ702757.1           | JQ702757.1; H1; Asia_W_Europe; 11; A263G; C315CC; A750G      | 16569 | Asia_W_Europe     | H1         | H           | H            | 11             |
| 956 | JQ702758.1           | JQ702758.1; J2b1a; Asia_W; 34; A73G; C150T; T152C            | 16570 | Asia_W            | J2b1a      | J           | J            | 34             |
| 957 | JQ702759.1           | JQ702759.1; U8a; Asia_W_Europe ; 31; A73G; A263G; T282C      | 16572 | Asia_W_Europe     | U8a        | U           | U8           | 31             |
| 958 | JQ702760.1           | JQ702760.1; K1a4a1f1; Asia_W; 40; A73G; T152C; T217C         | 16569 | Asia_W            | K1a4a1f1   | K           | K            | 40             |
| 959 | JQ702761.1           | JQ702761.1; U8a1a2; Asia_W_Europe ; 30; A73G; A263G; T282C   | 16570 | Asia_W_Europe     | U8a1a2     | U           | U8           | 30             |
| 960 | JQ702762.1           | JQ702762.1; H3g4; Asia_W_Europe; 17; T152C; A263G; C309CCCT  | 16570 | Asia_W_Europe     | H3g4       | H           | H            | 17             |
| 961 | JQ702763.1           | JQ702763.1; H1b1e1; Asia_W_Europe; 17; A263G; C315CC; A750G  | 16569 | Asia_W_Europe     | H1b1e1     | H           | H            | 17             |
| 962 | JQ702764.1           | JQ702764.1; H3; Asia_W_Europe; 10; A263G; C315CC; A750G      | 16569 | Asia_W_Europe     | H3         | H           | H            | 10             |
| 963 | JQ702765.1           | JQ702765.1; A2v1b; Asia_NE_America_N; 40; C64T; A73G; T146C  | 16568 | Asia_NE_America_N | A2v1b      | A           | A            | 40             |
| 964 | JQ702766.1           | JQ702766.1; H7h; Asia_W_Europe; 12; A263G; C315CC; A750G     | 16569 | Asia_W_Europe     | H7h        | H           | H            | 12             |
| 965 | JQ702767.1           | JQ702767.1; H8b; Asia_W_Europe; 13; T146C; A263G; C315CC     | 16569 | Asia_W_Europe     | H8b        | H           | H            | 13             |
| 966 | JQ702768.1           | JQ702768.1; H61; Asia_W_Europe; 12; A263G; C315CC; A750G     | 16569 | Asia_W_Europe     | H61        | H           | H            | 12             |
| 967 | JQ702769.1           | JQ702769.1; H3as; Asia_W_Europe; 11; A263G; C315CC; A750G    | 16569 | Asia_W_Europe     | H3as       | H           | H            | 11             |
| 968 | JQ702770.1           | JQ702770.1; H1aj1a; Asia_W_Europe; 17; G207A; A263G; C315CC  | 16569 | Asia_W_Europe     | H1aj1a     | H           | H            | 17             |
| 969 | JQ702771.1           | JQ702771.1; K2a11; Asia_W; 38; A73G; G143A; T146C            | 16569 | Asia_W            | K2a11      | K           | K            | 38             |
| 970 | JQ702772.1           | JQ702772.1; J2a1a1a2; Asia_W; 41; A73G; C150T; T152C         | 16570 | Asia_W            | J2a1a1a2   | J           | J            | 41             |
| 971 | JQ702773.1           | JQ702773.1; K1a4a1a1; Asia_W; 39; A73G; T195C; A263G         | 16571 | Asia_W            | K1a4a1a1   | K           | K            | 39             |
| 972 | JQ702774.1           | JQ702774.1; H3ad; Asia_W_Europe; 11; A263G; C315CC; A750G    | 16569 | Asia_W_Europe     | H3ad       | H           | H            | 11             |
| 973 | JQ702775.1           | JQ702775.1; U5a1b1; Asia_W_Europe_C; 28; A73G; A263G; C315CC | 16569 | Asia_W_Europe_C   | U5a1b1     | U           | U5           | 28             |
| 974 | JQ702776.1           | JQ702776.1; J1c5c1; Asia_W; 35; A73G; G185A; G228A           | 16567 | Asia_W            | J1c5c1     | J           | J            | 35             |
| 975 | JQ702777.1           | JQ702777.1; U4c1; Asia_N_Europe_N; 37; A73G; T195C; A263G    | 16571 | Asia_N_Europe_N   | U4c1       | U           | U4           | 37             |
| 976 | JQ702778.1           | JQ702778.1; HV15; Asia_W; 18; A200G; A263G; C309CCCT         | 16570 | Asia_W            | HV15       | HV          | HV           | 18             |
| 977 | JQ702779.1           | JQ702779.1; K1a4a1b1; Asia_W; 38; A73G; A263G; C309CCCT      | 16570 | Asia_W            | K1a4a1b1   | K           | K            | 38             |
| 978 | JQ702780.1           | JQ702780.1; K1a1b1a; Asia_W; 38; A73G; C114T; A263G          | 16569 | Asia_W            | K1a1b1a    | K           | K            | 38             |
| 979 | JQ702781.1           | JQ702781.1; K1a1b1; Asia_W; 36; A73G; C114T; A263G           | 16569 | Asia_W            | K1a1b1     | K           | K            | 36             |
| 980 | JQ702782.1           | JQ702782.1; K1a1b1d; Asia_W; 35; A73G; A263G; C315CC         | 16569 | Asia_W            | K1a1b1d    | K           | K            | 35             |
| 981 | JQ702783.1           | JQ702783.1; U4b2a; Asia_N_Europe_N; 32; A73G; T195C; A263G   | 16569 | Asia_N_Europe_N   | U4b2a      | U           | U4           | 32             |
| 982 | JQ702784.1           | JQ702784.1; T1a1; Asia_W; 37; A73G; C151T; T152C             | 16570 | Asia_W            | T1a1       | T           | T            | 37             |
| 983 | JQ702785.1           | JQ702785.1; K1a1b1b; Asia_W; 38; A73G; C114T; A189G          | 16569 | Asia_W            | K1a1b1b    | K           | K            | 38             |
| 984 | JQ702786.1           | JQ702786.1; H31; Asia_W_Europe; 14; T146C; T195C; A263G      | 16570 | Asia_W_Europe     | H31        | H           | H            | 14             |



**Supplementary Table S3** Human mitochondrial database (hMITO DB v1.0) metadata

| Row  | Name (accession no.) | Description                                                      | Size  | Geo_Region       | Haplogroup | Macro_Haplo | Macro_Haplo2 | Total Variants |
|------|----------------------|------------------------------------------------------------------|-------|------------------|------------|-------------|--------------|----------------|
| 985  | JQ702787.1           | JQ702787.1; H16; Asia_W_Europe; 11; A263G; C315CC; A750G         | 16569 | Asia_W_Europe    | H16        | H           | H            | 11             |
| 986  | JQ702788.1           | JQ702788.1; J1c3g; Asia_W; 32; A73G; G185A; T195C                | 16569 | Asia_W           | J1c3g      | J           | J            | 32             |
| 987  | JQ702789.1           | JQ702789.1; H3b+16129; Asia_W_Europe; 14; A263G; C309CCCT; T310C | 16573 | Asia_W_Europe    | H3b+16129  | H           | H            | 14             |
| 988  | JQ702790.1           | JQ702790.1; U5a1b1; Asia_W_Europe_C; 27; A73G; A263G; C309CCCT   | 16570 | Asia_W_Europe_C  | U5a1b1     | U           | U5           | 27             |
| 989  | JQ702791.1           | JQ702791.1; U5b2c2; Asia_W_Europe_C; 32; A73G; C150T; A263G      | 16571 | Asia_W_Europe_C  | U5b2c2     | U           | U5           | 32             |
| 990  | JQ702792.1           | JQ702792.1; U5b3a2; Asia_W_Europe_C; 31; A73G; C150T; A263G      | 16572 | Asia_W_Europe_C  | U5b3a2     | U           | U5           | 31             |
| 991  | JQ702793.1           | JQ702793.1; W1; Asia_W; 33; A73G; A189G; T195C                   | 16570 | Asia_W           | W1         | W           | W            | 33             |
| 992  | JQ702794.1           | JQ702794.1; V1a1; Europe_S; 18; T72C; A263G; C309CCCT            | 16570 | Europe_S         | V1a1       | V           | V            | 18             |
| 993  | JQ702795.1           | JQ702795.1; T2c1c2; Asia_W; 38; A73G; A263G; C315CC              | 16569 | Asia_W           | T2c1c2     | T           | T            | 38             |
| 994  | JQ702796.1           | JQ702796.1; K1a13; Asia_W; 35; A73G; T146C; T195C                | 16570 | Asia_W           | K1a13      | K           | K            | 35             |
| 995  | JQ702797.1           | JQ702797.1; K1a4a1a2b; Asia_W; 39; A73G; T146C; A263G            | 16571 | Asia_W           | K1a4a1a2b  | K           | K            | 39             |
| 996  | JQ702798.1           | JQ702798.1; K1a1b1b; Asia_W; 37; A73G; C114T; A189G              | 16569 | Asia_W           | K1a1b1b    | K           | K            | 37             |
| 997  | JQ702799.1           | JQ702799.1; H1ba; Asia_W_Europe; 12; A93G; A263G; C309CCCT       | 16571 | Asia_W_Europe    | H1ba       | H           | H            | 12             |
| 998  | JQ702800.1           | JQ702800.1; T2b4+152; Asia_W; 38; A73G; T152C; A263G             | 16568 | Asia_W           | T2b4+152   | T           | T            | 38             |
| 999  | JQ702801.1           | JQ702801.1; V; Europe_S; 15; T72C; A263G; C309CCCT               | 16570 | Europe_S         | V          | V           | V            | 15             |
| 1000 | JQ702802.1           | JQ702802.1; K1a1a; Asia_W; 35; A73G; A263G; C315CC               | 16569 | Asia_W           | K1a1a      | K           | K            | 35             |
| 1001 | JQ702803.1           | JQ702803.1; V7; Europe_S; 19; T72C; A93G; A263G                  | 16568 | Europe_S         | V7         | V           | V            | 19             |
| 1002 | JQ702804.1           | JQ702804.1; W3a1c; Asia_W; 40; A73G; A189G; C194T                | 16570 | Asia_W           | W3a1c      | W           | W            | 40             |
| 1003 | JQ702805.1           | JQ702805.1; K2b1a1a; Asia_W; 39; A73G; T146C; A263G              | 16569 | Asia_W           | K2b1a1a    | K           | K            | 39             |
| 1004 | JQ702806.1           | JQ702806.1; U5a1a2a; Asia_W_Europe_C; 30; A73G; A263G; C309CCCT  | 16572 | Asia_W_Europe_C  | U5a1a2a    | U           | U5           | 30             |
| 1005 | JQ702807.1           | JQ702807.1; U5b1d1; Asia_W_Europe_C; 29; A73G; C150T; A263G      | 16572 | Asia_W_Europe_C  | U5b1d1     | U           | U5           | 29             |
| 1006 | JQ702808.1           | JQ702808.1; H3; Asia_W_Europe; 11; A263G; C309CCCT; T310C        | 16570 | Asia_W_Europe    | H3         | H           | H            | 11             |
| 1007 | JQ702809.1           | JQ702809.1; U5a1a1d1; Asia_W_Europe_C; 31; A73G; G185A; A189G    | 16570 | Asia_W_Europe_C  | U5a1a1d1   | U           | U5           | 31             |
| 1008 | JQ702810.1           | JQ702810.1; K1b2b; Asia_W; 39; A73G; T146C; T195C                | 16570 | Asia_W           | K1b2b      | K           | K            | 39             |
| 1009 | JQ702811.1           | JQ702811.1; K1a4a1a1; Asia_W; 38; A73G; T195C; A263G             | 16571 | Asia_W           | K1a4a1a1   | K           | K            | 38             |
| 1010 | JQ702812.1           | JQ702812.1; U8a1a1b1; Asia_W_Europe ; 33; A73G; A263G; T282C     | 16570 | Asia_W_Europe    | U8a1a1b1   | U           | U8           | 33             |
| 1011 | JQ702813.1           | JQ702813.1; H6a1b3a; Asia_W_Europe; 21; T204C; T239C; A263G      | 16573 | Asia_W_Europe    | H6a1b3a    | H           | H            | 21             |
| 1012 | JQ702814.1           | JQ702814.1; H3m; Asia_W_Europe; 12; A73G; A263G; C315CC          | 16569 | Asia_W_Europe    | H3m        | H           | H            | 12             |
| 1013 | JQ702815.1           | JQ702815.1; U5b2a3; Asia_W_Europe_C; 32; A73G; C150T; A263G      | 16572 | Asia_W_Europe_C  | U5b2a3     | U           | U5           | 32             |
| 1014 | JQ702816.1           | JQ702816.1; U6a1b2; Asia_SW_Africa_N; 28; A73G; T195C; A263G     | 16570 | Asia_SW_Africa_N | U6a1b2     | U           | U6           | 28             |
| 1015 | JQ702817.1           | JQ702817.1; X2c1a; Asia_W_America_N; 30; A73G; A153G; T195C      | 16569 | Asia_W_America_N | X2c1a      | X           | X            | 30             |
| 1016 | JQ702818.1           | JQ702818.1; H10h; Asia_W_Europe; 12; A263G; C315CC; A750G        | 16569 | Asia_W_Europe    | H10h       | H           | H            | 12             |
| 1017 | JQ702819.1           | JQ702819.1; N1a1a1a3; Africa_NE_Asia_W; 40; A73G; T152C; T199C   | 16571 | Africa_NE_Asia_W | N1a1a1a3   | N           | N1           | 40             |
| 1018 | JQ702820.1           | JQ702820.1; I1a1e; Asia_W_SW; 47; A73G; T146C; T199C             | 16570 | Asia_W_SW        | I1a1e      | I           | I            | 47             |
| 1019 | JQ702821.1           | JQ702821.1; H48; Asia_W_Europe; 11; A263G; C309CCCT; T310C       | 16570 | Asia_W_Europe    | H48        | H           | H            | 11             |
| 1020 | JQ702822.1           | JQ702822.1; H6a1a; Asia_W_Europe; 18; T239C; A263G; C309CCCT     | 16570 | Asia_W_Europe    | H6a1a      | H           | H            | 18             |
| 1021 | JQ702823.1           | JQ702823.1; H3a1a; Asia_W_Europe; 15; T152C; A263G; C309CCCT     | 16571 | Asia_W_Europe    | H3a1a      | H           | H            | 15             |
| 1022 | JQ702824.1           | JQ702824.1; T2b; Asia_W; 35; A73G; A263G; C309CCCT               | 16570 | Asia_W           | T2b        | T           | T            | 35             |
| 1023 | JQ702825.1           | JQ702825.1; T1a1n; Asia_W; 40; A73G; T152C; T195C                | 16570 | Asia_W           | T1a1n      | T           | T            | 40             |
| 1024 | JQ702826.1           | JQ702826.1; J1c2; Asia_W; 33; A73G; G185A; A188G                 | 16567 | Asia_W           | J1c2       | J           | J            | 33             |
| 1025 | JQ702827.1           | JQ702827.1; J1c14; Asia_W; 35; A73G; T195C; G228A                | 16570 | Asia_W           | J1c14      | J           | J            | 35             |

**Supplementary Table S3** Human mitochondrial database (hMITO DB v1.0) metadata

| Row  | Name (accession no.) | Description                                                       | Size  | Geo_Region            | Haplogroup | Macro_Haplo | Macro_Haplo2 | Total Variants |
|------|----------------------|-------------------------------------------------------------------|-------|-----------------------|------------|-------------|--------------|----------------|
| 1026 | JQ702828.1           | JQ702828.1; H1q; Asia_W_Europe; 14; A263G; C315CC; A750G          | 16569 | Asia_W_Europe         | H1q        | H           | H            | 14             |
| 1027 | JQ702829.1           | JQ702829.1; H13a1a1d1; Asia_W_Europe; 20; A263G; C309CCCT; T310C  | 16562 | Asia_W_Europe         | H13a1a1d1  | H           | H            | 20             |
| 1028 | JQ702830.1           | JQ702830.1; H6a1b3a; Asia_W_Europe; 20; T204C; T239C; A263G       | 16570 | Asia_W_Europe         | H6a1b3a    | H           | H            | 20             |
| 1029 | JQ702831.1           | JQ702831.1; H59; Asia_W_Europe; 12; A73G; A263G; C309CCT          | 16571 | Asia_W_Europe         | H59        | H           | H            | 12             |
| 1030 | JQ702832.1           | JQ702832.1; H1c1; Asia_W_Europe; 14; A234G; A263G; C309CCT        | 16570 | Asia_W_Europe         | H1c1       | H           | H            | 14             |
| 1031 | JQ702833.1           | JQ702833.1; H1e1b; Asia_W_Europe; 13; A263G; C315CC; T453C        | 16569 | Asia_W_Europe         | H1e1b      | H           | H            | 13             |
| 1032 | JQ702834.1           | JQ702834.1; H39a; Asia_W_Europe; 12; A263G; C309CCCT; T310C       | 16571 | Asia_W_Europe         | H39a       | H           | H            | 12             |
| 1033 | JQ702835.1           | JQ702835.1; H13a1a1d1; Asia_W_Europe; 20; T152C; A263G; C309CCCT  | 16571 | Asia_W_Europe         | H13a1a1d1  | H           | H            | 20             |
| 1034 | JQ702836.1           | JQ702836.1; U5a1c1a; Asia_W_Europe_C; 29; A73G; A153G; T195C      | 16570 | Asia_W_Europe_C       | U5a1c1a    | U           | U5           | 29             |
| 1035 | JQ702837.1           | JQ702837.1; U5b1b1a; Asia_W_Europe_C; 30; A73G; C150T; A263G      | 16569 | Asia_W_Europe_C       | U5b1b1a    | U           | U5           | 30             |
| 1036 | JQ702838.1           | JQ702838.1; H24a; Asia_W_Europe; 12; T146C; A263G; C315CC         | 16569 | Asia_W_Europe         | H24a       | H           | H            | 12             |
| 1037 | JQ702839.1           | JQ702839.1; V2a1a; Europe_S; 20; T72C; A263G; C309CCCT            | 16571 | Europe_S              | V2a1a      | V           | V            | 20             |
| 1038 | JQ702840.1           | JQ702840.1; H14b3; Asia_W_Europe; 15; A189G; G225A; A263G         | 16569 | Asia_W_Europe         | H14b3      | H           | H            | 15             |
| 1039 | JQ702841.1           | JQ702841.1; H49a; Asia_W_Europe; 13; A263G; C309CCCT; T310C       | 16571 | Asia_W_Europe         | H49a       | H           | H            | 13             |
| 1040 | JQ702842.1           | JQ702842.1; V1a; Europe_S; 19; T72C; A263G; C309CCT               | 16570 | Europe_S              | V1a        | V           | V            | 19             |
| 1041 | JQ702843.1           | JQ702843.1; U5b2b3a; Asia_W_Europe_C; 37; A73G; C150T; A263G      | 16570 | Asia_W_Europe_C       | U5b2b3a    | U           | U5           | 37             |
| 1042 | JQ702844.1           | JQ702844.1; Z1a1a; Asia_C_E; 45; A73G; C151T; T152C               | 16569 | Asia_C_E              | Z1a1a      | Z           | Z            | 45             |
| 1043 | JQ702845.1           | JQ702845.1; U5b1b1a1a1; Asia_W_Europe_C; 31; A73G; C150T; A263G   | 16569 | Asia_W_Europe_C       | U5b1b1a1a1 | U           | U5           | 31             |
| 1044 | JQ702846.1           | JQ702846.1; H1+152; Asia_W_Europe; 11; T152C; A263G; C315CC       | 16569 | Asia_W_Europe         | H1+152     | H           | H            | 11             |
| 1045 | JQ702847.1           | JQ702847.1; U5a2b3a; Asia_W_Europe_C; 31; A73G; C150T; A263G      | 16569 | Asia_W_Europe_C       | U5a2b3a    | U           | U5           | 31             |
| 1046 | JQ702848.1           | JQ702848.1; H1b1a; Asia_W_Europe; 16; A263G; C315CC; CA522d       | 16568 | Asia_W_Europe         | H1b1a      | H           | H            | 16             |
| 1047 | JQ702849.1           | JQ702849.1; K1b2a2; Asia_W; 36; A73G; T146C; T195C                | 16573 | Asia_W                | K1b2a2     | K           | K            | 36             |
| 1048 | JQ702850.1           | JQ702850.1; H1c7; Asia_W_Europe; 11; A263G; C315CC; T477C         | 16569 | Asia_W_Europe         | H1c7       | H           | H            | 11             |
| 1049 | JQ702851.1           | JQ702851.1; K1c1b; Asia_W; 35; A73G; T146C; T152C                 | 16568 | Asia_W                | K1c1b      | K           | K            | 35             |
| 1050 | JQ702852.1           | JQ702852.1; K1+16362; Asia_W; 40; A73G; C194T; T246C              | 16569 | Asia_W                | K1+16362   | K           | K            | 40             |
| 1051 | JQ702853.1           | JQ702853.1; T1a1; Asia_W; 38; A73G; C151T; T152C                  | 16571 | Asia_W                | T1a1       | T           | T            | 38             |
| 1052 | JQ702854.1           | JQ702854.1; K1a+195; Asia_W; 31; A73G; T195C; A263G               | 16569 | Asia_W                | K1a+195    | K           | K            | 31             |
| 1053 | JQ702855.1           | JQ702855.1; B2a1; Asia_SE_E_America_N_S; 34; A73G; A263G; C309CCT | 16561 | Asia_SE_E_America_N_S | B2a1       | B           | B            | 34             |
| 1054 | JQ702856.1           | JQ702856.1; H1n5; Asia_W_Europe; 13; T146C; T195C; A263G          | 16569 | Asia_W_Europe         | H1n5       | H           | H            | 13             |
| 1055 | JQ702857.1           | JQ702857.1; J1c7a; Asia_W; 32; A73G; G185A; A263G                 | 16570 | Asia_W                | J1c7a      | J           | J            | 32             |
| 1056 | JQ702858.1           | JQ702858.1; J2b1a3; Asia_W; 33; A73G; C150T; T152C                | 16570 | Asia_W                | J2b1a3     | J           | J            | 33             |
| 1057 | JQ702859.1           | JQ702859.1; K1a1b1a; Asia_W; 36; A73G; C114T; A263G               | 16569 | Asia_W                | K1a1b1a    | K           | K            | 36             |
| 1058 | JQ702860.1           | JQ702860.1; H33a; Asia_W_Europe; 10; A263G; C315CC; A750G         | 16569 | Asia_W_Europe         | H33a       | H           | H            | 10             |
| 1059 | JQ702861.1           | JQ702861.1; K1c2; Asia_W; 36; A73G; T146C; T152C                  | 16568 | Asia_W                | K1c2       | K           | K            | 36             |
| 1060 | JQ702862.1           | JQ702862.1; U4a2e; Asia_N_Europe_N; 32; A73G; T195C; A263G        | 16572 | Asia_N_Europe_N       | U4a2e      | U           | U4           | 32             |
| 1061 | JQ702863.1           | JQ702863.1; J2b1a1a; Asia_W; 33; A73G; C150T; T152C               | 16569 | Asia_W                | J2b1a1a    | J           | J            | 33             |
| 1062 | JQ702864.1           | JQ702864.1; U4b1b1b; Asia_N_Europe_N; 39; A73G; T152C; T195C      | 16569 | Asia_N_Europe_N       | U4b1b1b    | U           | U4           | 39             |
| 1063 | JQ702865.1           | JQ702865.1; H8c; Asia_W_Europe; 21; C114T; T146C; T152C           | 16569 | Asia_W_Europe         | H8c        | H           | H            | 21             |
| 1064 | JQ702866.1           | JQ702866.1; J1b1a1b; Asia_W; 39; A73G; A153G; C242T               | 16570 | Asia_W                | J1b1a1b    | J           | J            | 39             |
| 1065 | JQ702867.1           | JQ702867.1; H1c8; Asia_W_Europe; 15; T152C; A263G; C309CCT        | 16570 | Asia_W_Europe         | H1c8       | H           | H            | 15             |
| 1066 | JQ702868.1           | JQ702868.1; J1c8a; Asia_W; 30; A73G; G185A; G228A                 | 16569 | Asia_W                | J1c8a      | J           | J            | 30             |

**Supplementary Table S3** Human mitochondrial database (hMITO DB v1.0) metadata

| Row  | Name (accession no.) | Description                                                       | Size  | Geo_Region       | Haplogroup | Macro_Haplo | Macro_Haplo2 | Total Variants |
|------|----------------------|-------------------------------------------------------------------|-------|------------------|------------|-------------|--------------|----------------|
| 1067 | JQ702869.1           | JQ702869.1; K1a1a2a1; Asia_W; 37; A73G; A263G; C309CCT            | 16571 | Asia_W           | K1a1a2a1   | K           | K            | 37             |
| 1068 | JQ702870.1           | JQ702870.1; H1j; Asia_W_Europe; 13; A263G; C309CCT; T310C         | 16570 | Asia_W_Europe    | H1j        | H           | H            | 13             |
| 1069 | JQ702871.1           | JQ702871.1; U5a1a2a; Asia_W_Europe_C; 31; A73G; A263G; C309CCT    | 16572 | Asia_W_Europe_C  | U5a1a2a    | U           | U5           | 31             |
| 1070 | JQ702872.1           | JQ702872.1; K1a10a; Asia_W; 34; A73G; T195C; A263G                | 16571 | Asia_W           | K1a10a     | K           | K            | 34             |
| 1071 | JQ702873.1           | JQ702873.1; H1c7; Asia_W_Europe; 12; A263G; C315CC; T477C         | 16569 | Asia_W_Europe    | H1c7       | H           | H            | 12             |
| 1072 | JQ702874.1           | JQ702874.1; H4a1a1a; Asia_W_Europe; 18; A73G; A263G; C315CC       | 16567 | Asia_W_Europe    | H4a1a1a    | H           | H            | 18             |
| 1073 | JQ702875.1           | JQ702875.1; H51a; Asia_W_Europe; 13; A263G; C309CCT; T310C        | 16570 | Asia_W_Europe    | H51a       | H           | H            | 13             |
| 1074 | JQ702876.1           | JQ702876.1; J1c8a; Asia_W; 29; A73G; G185A; G228A                 | 16570 | Asia_W           | J1c8a      | J           | J            | 29             |
| 1075 | JQ702877.1           | JQ702877.1; H10e; Asia_W_Europe; 13; A263G; C315CC; G709A         | 16569 | Asia_W_Europe    | H10e       | H           | H            | 13             |
| 1076 | JQ702878.1           | JQ702878.1; U5a1h; Asia_W_Europe_C; 36; A73G; C150T; A263G        | 16570 | Asia_W_Europe_C  | U5a1h      | U           | U5           | 36             |
| 1077 | JQ702879.1           | JQ702879.1; H10e; Asia_W_Europe; 12; A263G; C315CC; A750G         | 16569 | Asia_W_Europe    | H10e       | H           | H            | 12             |
| 1078 | JQ702880.1           | JQ702880.1; T2a1a5; Asia_W; 36; A73G; A263G; C315CC               | 16569 | Asia_W           | T2a1a5     | T           | T            | 36             |
| 1079 | JQ702881.1           | JQ702881.1; H1b1+16362; Asia_W_Europe; 20; A263G; C309CCCT; T310C | 16569 | Asia_W_Europe    | H1b1+16362 | H           | H            | 20             |
| 1080 | JQ702882.1           | JQ702882.1; I1a1; Asia_W_SW; 42; A73G; C150T; T199C               | 16572 | Asia_W_SW        | I1a1       | I           | I            | 42             |
| 1081 | JQ702883.1           | JQ702883.1; K1d1; Asia_W; 38; A73G; T195C; A200G                  | 16572 | Asia_W           | K1d1       | K           | K            | 38             |
| 1082 | JQ702884.1           | JQ702884.1; T2b5; Asia_W; 34; A73G; A263G; C315CC                 | 16569 | Asia_W           | T2b5       | T           | T            | 34             |
| 1083 | JQ702885.1           | JQ702885.1; T2b5a1; Asia_W; 39; A73G; T152C; A263G                | 16571 | Asia_W           | T2b5a1     | T           | T            | 39             |
| 1084 | JQ702886.1           | JQ702886.1; H4a1a3a; Asia_W_Europe; 18; T195C; A263G; C315CC      | 16567 | Asia_W_Europe    | H4a1a3a    | H           | H            | 18             |
| 1085 | JQ702887.1           | JQ702887.1; K2a; Asia_W; 37; A73G; T152C; T199C                   | 16571 | Asia_W           | K2a        | K           | K            | 37             |
| 1086 | JQ702888.1           | JQ702888.1; X2b; Asia_W_America_N; 32; A73G; A153G; T195C         | 16569 | Asia_W_America_N | X2b        | X           | X            | 32             |
| 1087 | JQ702889.1           | JQ702889.1; H49a2; Asia_W_Europe; 14; A93G; A263G; C309CCT        | 16570 | Asia_W_Europe    | H49a2      | H           | H            | 14             |
| 1088 | JQ702890.1           | JQ702890.1; H2a1e; Asia_W_Europe; 9; A263G; C315CC; C575T         | 16569 | Asia_W_Europe    | H2a1e      | H           | H            | 9              |
| 1089 | JQ702891.1           | JQ702891.1; T2e5; Asia_W; 35; A73G; C150T; A200G                  | 16571 | Asia_W           | T2e5       | T           | T            | 35             |
| 1090 | JQ702892.1           | JQ702892.1; H5a1; Asia_W_Europe; 14; A263G; C315CC; C456T         | 16567 | Asia_W_Europe    | H5a1       | H           | H            | 14             |
| 1091 | JQ702893.1           | JQ702893.1; X2b6a; Asia_W_America_N; 37; A73G; A153G; T195C       | 16569 | Asia_W_America_N | X2b6a      | X           | X            | 37             |
| 1092 | JQ702894.1           | JQ702894.1; T2b36; Asia_W; 36; A73G; A263G; C315CC                | 16569 | Asia_W           | T2b36      | T           | T            | 36             |
| 1093 | JQ702895.1           | JQ702895.1; H5m; Asia_W_Europe; 16; T146C; A263G; C309CCT         | 16570 | Asia_W_Europe    | H5m        | H           | H            | 16             |
| 1094 | JQ702896.1           | JQ702896.1; K1a4a1a2b; Asia_W; 39; A73G; T146C; A263G             | 16570 | Asia_W           | K1a4a1a2b  | K           | K            | 39             |
| 1095 | JQ702897.1           | JQ702897.1; H; Asia_W_Europe; 12; A93G; C151T; A263G              | 16569 | Asia_W_Europe    | H          | H           | H            | 12             |
| 1096 | JQ702898.1           | JQ702898.1; K1a1b1b; Asia_W; 37; A73G; C114T; T195C               | 16570 | Asia_W           | K1a1b1b    | K           | K            | 37             |
| 1097 | JQ702899.1           | JQ702899.1; H1c3; Asia_W_Europe; 16; T195C; A257G; A263G          | 16570 | Asia_W_Europe    | H1c3       | H           | H            | 16             |
| 1098 | JQ702900.1           | JQ702900.1; H2a2b4; Asia_W_Europe; 10; A263G; C309CCT; T310C      | 16570 | Asia_W_Europe    | H2a2b4     | H           | H            | 10             |
| 1099 | JQ702901.1           | JQ702901.1; K1c1e; Asia_W; 35; A73G; T146C; T195C                 | 16568 | Asia_W           | K1c1e      | K           | K            | 35             |
| 1100 | JQ702902.1           | JQ702902.1; K1a8; Asia_W; 37; A73G; A263G; C295A                  | 16575 | Asia_W           | K1a8       | K           | K            | 37             |
| 1101 | JQ702903.1           | JQ702903.1; L1c2b1c; Africa_C; 93; A73G; T152C; C182T             | 16568 | Africa_C         | L1c2b1c    | L1          | L1           | 93             |
| 1102 | JQ702904.1           | JQ702904.1; L2a1l2a1; Africa_W_C; 55; A73G; T146C; T152C          | 16570 | Africa_W_C       | L2a1l2a1   | L2          | L2           | 55             |
| 1103 | JQ702905.1           | JQ702905.1; K1c1e; Asia_W; 36; A73G; T146C; T152C                 | 16568 | Asia_W           | K1c1e      | K           | K            | 36             |
| 1104 | JQ702906.1           | JQ702906.1; H55+153; Asia_W_Europe; 12; A153G; A263G; C309CCCT    | 16571 | Asia_W_Europe    | H55+153    | H           | H            | 12             |
| 1105 | JQ702907.1           | JQ702907.1; H1aq1; Asia_W_Europe; 14; A263G; C315CC; CA522d       | 16567 | Asia_W_Europe    | H1aq1      | H           | H            | 14             |
| 1106 | JQ702908.1           | JQ702908.1; K1c1b; Asia_W; 36; A73G; T146C; T152C                 | 16568 | Asia_W           | K1c1b      | K           | K            | 36             |
| 1107 | JQ702909.1           | JQ702909.1; H3z; Asia_W_Europe; 12; A263G; T293C; C309CCCT        | 16571 | Asia_W_Europe    | H3z        | H           | H            | 12             |

**Supplementary Table S3** Human mitochondrial database (hMITO DB v1.0) metadata

| Row  | Name (accession no.) | Description                                                   | Size  | Geo_Region          | Haplogroup | Macro_Haplo | Macro_Haplo2 | Total Variants |
|------|----------------------|---------------------------------------------------------------|-------|---------------------|------------|-------------|--------------|----------------|
| 1108 | JQ702910.1           | JQ702910.1; H4a1a4b; Asia_W_Europe; 20; T195C; A263G; C315CC  | 16567 | Asia_W_Europe       | H4a1a4b    | H           | H            | 20             |
| 1109 | JQ702911.1           | JQ702911.1; K1a4h1; Asia_W; 38; A73G; G207A; A263G            | 16572 | Asia_W              | K1a4h1     | K           | K            | 38             |
| 1110 | JQ702912.1           | JQ702912.1; J1c3k; Asia_W; 31; A73G; G185A; A263G             | 16570 | Asia_W              | J1c3k      | J           | J            | 31             |
| 1111 | JQ702913.1           | JQ702913.1; U5a1g1; Asia_W_Europe_C; 28; A73G; A263G; C315CC  | 16569 | Asia_W_Europe_C     | U5a1g1     | U           | U5           | 28             |
| 1112 | JQ702914.1           | JQ702914.1; C1b; Asia_NE_America_N_S; 41; A73G; A249d; A263G  | 16563 | Asia_NE_America_N_S | C1b        | C           | C            | 41             |
| 1113 | JQ702915.1           | JQ702915.1; H7a1b; Asia_W_Europe; 16; T89C; A93G; A263G       | 16571 | Asia_W_Europe       | H7a1b      | H           | H            | 16             |
| 1114 | JQ702916.1           | JQ702916.1; H28a; Asia_W_Europe; 13; C186A; A263G; C309CCT    | 16570 | Asia_W_Europe       | H28a       | H           | H            | 13             |
| 1115 | JQ702917.1           | JQ702917.1; U5a2b; Asia_W_Europe_C; 28; A73G; T152C; A263G    | 16572 | Asia_W_Europe_C     | U5a2b      | U           | U5           | 28             |
| 1116 | JQ702918.1           | JQ702918.1; H64; Asia_W_Europe; 13; A263G; C315CC; A750G      | 16569 | Asia_W_Europe       | H64        | H           | H            | 13             |
| 1117 | JQ702919.1           | JQ702919.1; K1b1a1a; Asia_W; 42; A73G; T152C; T199C           | 16572 | Asia_W              | K1b1a1a    | K           | K            | 42             |
| 1118 | JQ702920.1           | JQ702920.1; K2a4; Asia_W; 33; A73G; T146C; T152C              | 16569 | Asia_W              | K2a4       | K           | K            | 33             |
| 1119 | JQ702921.1           | JQ702921.1; H3b2; Asia_W_Europe; 14; A263G; C309CCT; T310C    | 16570 | Asia_W_Europe       | H3b2       | H           | H            | 14             |
| 1120 | JQ702922.1           | JQ702922.1; U5a1a1c; Asia_W_Europe_C; 29; A73G; A263G; C315CC | 16569 | Asia_W_Europe_C     | U5a1a1c    | U           | U5           | 29             |
| 1121 | JQ702923.1           | JQ702923.1; T1a1c; Asia_W; 39; A73G; T152C; T195C             | 16570 | Asia_W              | T1a1c      | T           | T            | 39             |
| 1122 | JQ702924.1           | JQ702924.1; H40b; Asia_W_Europe; 13; T152C; A263G; C309CCT    | 16570 | Asia_W_Europe       | H40b       | H           | H            | 13             |
| 1123 | JQ702925.1           | JQ702925.1; T1a1j; Asia_W; 37; A73G; T152C; T195C             | 16570 | Asia_W              | T1a1j      | T           | T            | 37             |
| 1124 | JQ702926.1           | JQ702926.1; K1b2a1a1; Asia_W; 39; A73G; T146C; T195C          | 16573 | Asia_W              | K1b2a1a1   | K           | K            | 39             |
| 1125 | JQ702927.1           | JQ702927.1; U5b2b1b; Asia_W_Europe_C; 31; A73G; C150T; A263G  | 16569 | Asia_W_Europe_C     | U5b2b1b    | U           | U5           | 31             |
| 1126 | JQ702928.1           | JQ702928.1; T2c1d+152; Asia_W; 39; A73G; T146C; T152C         | 16570 | Asia_W              | T2c1d+152  | T           | T            | 39             |
| 1127 | JQ702929.1           | JQ702929.1; J1c7a; Asia_W; 34; A73G; G228A; A263G             | 16569 | Asia_W              | J1c7a      | J           | J            | 34             |
| 1128 | JQ702930.1           | JQ702930.1; U8a1a; Asia_W_Europe ; 28; A73G; A263G; T282C     | 16570 | Asia_W_Europe       | U8a1a      | U           | U8           | 28             |
| 1129 | JQ702931.1           | JQ702931.1; K1a16; Asia_W; 32; A73G; T195C; A263G             | 16573 | Asia_W              | K1a16      | K           | K            | 32             |
| 1130 | JQ702932.1           | JQ702932.1; T2b3c; Asia_W; 40; A73G; C151T; A263G             | 16569 | Asia_W              | T2b3c      | T           | T            | 40             |
| 1131 | JQ702933.1           | JQ702933.1; H40b; Asia_W_Europe; 12; A263G; C309CCT; T310C    | 16570 | Asia_W_Europe       | H40b       | H           | H            | 12             |
| 1132 | JQ702934.1           | JQ702934.1; U2e2a1a; Asia_S_W_Europe; 42; A73G; T152C; T217C  | 16571 | Asia_S_W_Europe     | U2e2a1a    | U           | U2           | 42             |
| 1133 | JQ702935.1           | JQ702935.1; V10a; Europe_S; 20; T72C; A263G; C309CCT          | 16570 | Europe_S            | V10a       | V           | V            | 20             |
| 1134 | JQ702936.1           | JQ702936.1; H4a2; Asia_W_Europe; 17; A263G; C309CCT; T310C    | 16568 | Asia_W_Europe       | H4a2       | H           | H            | 17             |
| 1135 | JQ702937.1           | JQ702937.1; T2a1b1a1; Asia_W; 41; A73G; A263G; C309CCT        | 16570 | Asia_W              | T2a1b1a1   | T           | T            | 41             |
| 1136 | JQ702938.1           | JQ702938.1; V1b; Europe_S; 18; T72C; A263G; C309CCT           | 16571 | Europe_S            | V1b        | V           | V            | 18             |
| 1137 | JQ702939.1           | JQ702939.1; I1a1a; Asia_W_SW; 44; A73G; T199C; G203A          | 16574 | Asia_W_SW           | I1a1a      | I           | I            | 44             |
| 1138 | JQ702940.1           | JQ702940.1; R0a4; Africa_NE_Asia_W; 20; T57TC; C64T; C150T    | 16570 | Africa_NE_Asia_W    | R0a4       | R           | R0           | 20             |
| 1139 | JQ702941.1           | JQ702941.1; U2e3a; Asia_S_W_Europe; 45; A73G; T152C; T217C    | 16572 | Asia_S_W_Europe     | U2e3a      | U           | U2           | 45             |
| 1140 | JQ702942.1           | JQ702942.1; U4a2a; Asia_N_Europe_N; 29; A73G; T195C; A263G    | 16568 | Asia_N_Europe_N     | U4a2a      | U           | U4           | 29             |
| 1141 | JQ702943.1           | JQ702943.1; H2b; Asia_W_Europe; 12; T152C; A263G; C309CCT     | 16570 | Asia_W_Europe       | H2b        | H           | H            | 12             |
| 1142 | JQ702944.1           | JQ702944.1; K1c2; Asia_W; 36; A73G; T146C; T152C              | 16568 | Asia_W              | K1c2       | K           | K            | 36             |
| 1143 | JQ702945.1           | JQ702945.1; K1a1b1a; Asia_W; 37; A73G; C114T; A263G           | 16569 | Asia_W              | K1a1b1a    | K           | K            | 37             |
| 1144 | JQ702946.1           | JQ702946.1; H5a1; Asia_W_Europe; 15; G66T; A263G; C315CC      | 16567 | Asia_W_Europe       | H5a1       | H           | H            | 15             |
| 1145 | JQ702947.1           | JQ702947.1; K1a15; Asia_W; 33; A73G; T195C; A263G             | 16573 | Asia_W              | K1a15      | K           | K            | 33             |
| 1146 | JQ702948.1           | JQ702948.1; H7; Asia_W_Europe; 11; A263G; C315CC; A750G       | 16569 | Asia_W_Europe       | H7         | H           | H            | 11             |
| 1147 | JQ702949.1           | JQ702949.1; H3; Asia_W_Europe; 11; T146C; A263G; C309CCT      | 16570 | Asia_W_Europe       | H3         | H           | H            | 11             |
| 1148 | JQ702950.1           | JQ702950.1; J2a1a1; Asia_W; 40; A73G; C150T; T152C            | 16570 | Asia_W              | J2a1a1     | J           | J            | 40             |

**Supplementary Table S3** Human mitochondrial database (hMITO DB v1.0) metadata

| Row  | Name (accession no.) | Description                                                   | Size  | Geo_Region           | Haplogroup  | Macro_ Haplo | Macro_ Haplo2 | Total Variants |
|------|----------------------|---------------------------------------------------------------|-------|----------------------|-------------|--------------|---------------|----------------|
| 1149 | JQ702951.1           | JQ702951.1; T2b3e; Asia_W; 39; A73G; C151T; A263G             | 16570 | Asia_W               | T2b3e       | T            | T             | 39             |
| 1150 | JQ702952.1           | JQ702952.1; T1a4; Asia_W; 41; A73G; T152C; A263G              | 16570 | Asia_W               | T1a4        | T            | T             | 41             |
| 1151 | JQ702953.1           | JQ702953.1; T2b26; Asia_W; 37; A73G; T152C; T195C             | 16569 | Asia_W               | T2b26       | T            | T             | 37             |
| 1152 | JQ702954.1           | JQ702954.1; T2e; Asia_W; 35; A73G; C150T; A263G               | 16571 | Asia_W               | T2e         | T            | T             | 35             |
| 1153 | JQ702955.1           | JQ702955.1; M1a; Africa_E_Nile Valley; 42; A73G; G143A; T146C | 16569 | Africa_E_Nile Valley | M1a         | M            | M1            | 42             |
| 1154 | JQ702956.1           | JQ702956.1; H4a1; Asia_W_Europe; 17; A263G; C315CC; CA522d    | 16567 | Asia_W_Europe        | H4a1        | H            | H             | 17             |
| 1155 | JQ702957.1           | JQ702957.1; T2f5; Asia_W; 36; A73G; A263G; C315CC             | 16560 | Asia_W               | T2f5        | T            | T             | 36             |
| 1156 | JQ702958.1           | JQ702958.1; T1a1b; Asia_W; 39; A73G; T152C; T195C             | 16570 | Asia_W               | T1a1b       | T            | T             | 39             |
| 1157 | JQ702959.1           | JQ702959.1; T1a1k1; Asia_W; 38; A73G; T146C; T152C            | 16571 | Asia_W               | T1a1k1      | T            | T             | 38             |
| 1158 | JQ702960.1           | JQ702960.1; H4c1; Asia_W_Europe; 15; A73G; A263G; C315CC      | 16567 | Asia_W_Europe        | H4c1        | H            | H             | 15             |
| 1159 | JQ702961.1           | JQ702961.1; H27d; Asia_W_Europe; 12; A263G; C315CC; G380A     | 16569 | Asia_W_Europe        | H27d        | H            | H             | 12             |
| 1160 | JQ702962.1           | JQ702962.1; T1a1; Asia_W; 36; A73G; T152C; T195C              | 16570 | Asia_W               | T1a1        | T            | T             | 36             |
| 1161 | JQ702963.1           | JQ702963.1; T2b13; Asia_W; 38; A73G; T195C; A263G             | 16570 | Asia_W               | T2b13       | T            | T             | 38             |
| 1162 | JQ702964.1           | JQ702964.1; U5b2a1a1; Asia_W_Europe_C; 29; A73G; C150T; A263G | 16569 | Asia_W_Europe_C      | U5b2a1a1    | U            | U5            | 29             |
| 1163 | JQ702965.1           | JQ702965.1; T2b+150; Asia_W; 35; A73G; C150T; A263G           | 16569 | Asia_W               | T2b+150     | T            | T             | 35             |
| 1164 | JQ702966.1           | JQ702966.1; H11a; Asia_W_Europe; 14; T195C; A263G; C315CC     | 16569 | Asia_W_Europe        | H11a        | H            | H             | 14             |
| 1165 | JQ702967.1           | JQ702967.1; J1c11; Asia_W; 28; A73G; G185A; G228A             | 16569 | Asia_W               | J1c11       | J            | J             | 28             |
| 1166 | JQ702968.1           | JQ702968.1; L2a1c+16129; Africa_W_C; 58; A73G; G143A; T146C   | 16568 | Africa_W_C           | L2a1c+16129 | L2           | L2            | 58             |
| 1167 | JQ702969.1           | JQ702969.1; T2a1a; Asia_W; 34; A73G; A263G; C309CCT           | 16570 | Asia_W               | T2a1a       | T            | T             | 34             |
| 1168 | JQ702970.1           | JQ702970.1; U5a1h; Asia_W_Europe_C; 34; A73G; C150T; A263G    | 16569 | Asia_W_Europe_C      | U5a1h       | U            | U5            | 34             |
| 1169 | JQ702971.1           | JQ702971.1; H1u1; Asia_W_Europe; 13; A263G; C315CC; A750G     | 16569 | Asia_W_Europe        | H1u1        | H            | H             | 13             |
| 1170 | JQ702972.1           | JQ702972.1; T2a1b1a; Asia_W; 38; A73G; T146C; A263G           | 16569 | Asia_W               | T2a1b1a     | T            | T             | 38             |
| 1171 | JQ702973.1           | JQ702973.1; N1b1a8a; Africa_NE_Asia_W; 38; A73G; T152C; T195C | 16569 | Africa_NE_Asia_W     | N1b1a8a     | N            | N1            | 38             |
| 1172 | JQ702974.1           | JQ702974.1; H2a2a2; Asia_W_Europe; 8; T152C; A200G; A263G     | 16570 | Asia_W_Europe        | H2a2a2      | H            | H             | 8              |
| 1173 | JQ702975.1           | JQ702975.1; T2f1a1; Asia_W; 43; A73G; T195C; A263G            | 16561 | Asia_W               | T2f1a1      | T            | T             | 43             |
| 1174 | JQ702976.1           | JQ702976.1; J1b1a1a; Asia_W; 40; A73G; C242T; A263G           | 16569 | Asia_W               | J1b1a1a     | J            | J             | 40             |
| 1175 | JQ702977.1           | JQ702977.1; K1c2; Asia_W; 38; A73G; T146C; T152C              | 16570 | Asia_W               | K1c2        | K            | K             | 38             |
| 1176 | JQ702978.1           | JQ702978.1; T2b5; Asia_W; 35; A73G; A263G; C309CCT            | 16570 | Asia_W               | T2b5        | T            | T             | 35             |
| 1177 | JQ702979.1           | JQ702979.1; T2b; Asia_W; 36; A73G; A263G; C315CC              | 16567 | Asia_W               | T2b         | T            | T             | 36             |
| 1178 | JQ702980.1           | JQ702980.1; T2b; Asia_W; 33; A73G; A263G; C315CC              | 16571 | Asia_W               | T2b         | T            | T             | 33             |
| 1179 | JQ702981.1           | JQ702981.1; J1c1b2a; Asia_W; 34; A73G; G228A; A263G           | 16567 | Asia_W               | J1c1b2a     | J            | J             | 34             |
| 1180 | JQ702982.1           | JQ702982.1; T2b5a1; Asia_W; 37; A73G; A263G; C309CCT          | 16572 | Asia_W               | T2b5a1      | T            | T             | 37             |
| 1181 | JQ702983.1           | JQ702983.1; H1aq1; Asia_W_Europe; 13; A263G; C315CC; CA522d   | 16567 | Asia_W_Europe        | H1aq1       | H            | H             | 13             |
| 1182 | JQ702984.1           | JQ702984.1; C1b9; Asia_NE_America_N_S; 45; A73G; T146C; A249d | 16565 | Asia_NE_America_N_S  | C1b9        | C            | C             | 45             |
| 1183 | JQ702985.1           | JQ702985.1; H49a1; Asia_W_Europe; 12; A263G; C309CCT; T310C   | 16570 | Asia_W_Europe        | H49a1       | H            | H             | 12             |
| 1184 | JQ702986.1           | JQ702986.1; T1a1; Asia_W; 34; A73G; T152C; T195C              | 16569 | Asia_W               | T1a1        | T            | T             | 34             |
| 1185 | JQ702987.1           | JQ702987.1; M30b; Asia_S; 40; C44CC; A73G; T152C              | 16570 | Asia_S               | M30b        | M            | M30           | 40             |
| 1186 | JQ702988.1           | JQ702988.1; T1a1+@152; Asia_W; 34; A73G; T195C; A263G         | 16569 | Asia_W               | T1a1+@152   | T            | T             | 34             |
| 1187 | JQ702989.1           | JQ702989.1; W+194; Asia_W; 36; A73G; A189G; C194T             | 16568 | Asia_W               | W+194       | W            | W             | 36             |
| 1188 | JQ702990.1           | JQ702990.1; H7b; Asia_W_Europe; 11; A263G; C315CC; A750G      | 16569 | Asia_W_Europe        | H7b         | H            | H             | 11             |
| 1189 | JQ702991.1           | JQ702991.1; K1a13a; Asia_W; 37; A73G; T146C; T195C            | 16571 | Asia_W               | K1a13a      | K            | K             | 37             |

**Supplementary Table S3** Human mitochondrial database (hMITO DB v1.0) metadata

| Row  | Name (accession no.) | Description                                                         | Size  | Geo_Region          | Haplogroup    | Macro_ Haplo | Macro_ Haplo2 | Total Variants |
|------|----------------------|---------------------------------------------------------------------|-------|---------------------|---------------|--------------|---------------|----------------|
| 1190 | JQ702992.1           | JQ702992.1; H1e2b; Asia_W_Europe; 13; A263G; C309CCT; T310C         | 16570 | Asia_W_Europe       | H1e2b         | H            | H             | 13             |
| 1191 | JQ702993.1           | JQ702993.1; X2c1a; Asia_W_America_N; 32; A73G; A153G; T195C         | 16569 | Asia_W_America_N    | X2c1a         | X            | X             | 32             |
| 1192 | JQ702994.1           | JQ702994.1; H16a1; Asia_W_Europe; 14; T152C; A263G; C315CC          | 16569 | Asia_W_Europe       | H16a1         | H            | H             | 14             |
| 1193 | JQ702995.1           | JQ702995.1; X2b+226+16192; Asia_W_America_N; 34; A73G; T152C; A153G | 16570 | Asia_W_America_N    | X2b+226+16192 | X            | X             | 34             |
| 1194 | JQ702996.1           | JQ702996.1; J1c5a1; Asia_W; 33; A73G; G185A; G228A                  | 16569 | Asia_W              | J1c5a1        | J            | J             | 33             |
| 1195 | JQ702997.1           | JQ702997.1; H26a1; Asia_W_Europe; 15; T152C; C194T; A263G           | 16570 | Asia_W_Europe       | H26a1         | H            | H             | 15             |
| 1196 | JQ702998.1           | JQ702998.1; H5a1; Asia_W_Europe; 14; A263G; C315CC; C456T           | 16567 | Asia_W_Europe       | H5a1          | H            | H             | 14             |
| 1197 | JQ702999.1           | JQ702999.1; H3+152; Asia_W_Europe; 11; T152C; A263G; C315CC         | 16571 | Asia_W_Europe       | H3+152        | H            | H             | 11             |
| 1198 | JQ703000.1           | JQ703000.1; H4a1a4b1; Asia_W_Europe; 23; T195C; A263G; C315CC       | 16567 | Asia_W_Europe       | H4a1a4b1      | H            | H             | 23             |
| 1199 | JQ703001.1           | JQ703001.1; K2b1a1; Asia_W; 37; A73G; T146C; T152C                  | 16569 | Asia_W              | K2b1a1        | K            | K             | 37             |
| 1200 | JQ703002.1           | JQ703002.1; H10e1; Asia_W_Europe; 14; A263G; C309CCCT; T310C        | 16571 | Asia_W_Europe       | H10e1         | H            | H             | 14             |
| 1201 | JQ703003.1           | JQ703003.1; K1b1c; Asia_W; 37; A73G; G94A; A263G                    | 16570 | Asia_W              | K1b1c         | K            | K             | 37             |
| 1202 | JQ703004.1           | JQ703004.1; H30a; Asia_W_Europe; 15; A263G; C309CCT; T310C          | 16570 | Asia_W_Europe       | H30a          | H            | H             | 15             |
| 1203 | JQ703005.1           | JQ703005.1; K1a10; Asia_W; 35; A73G; T195C; A263G                   | 16573 | Asia_W              | K1a10         | K            | K             | 35             |
| 1204 | JQ703006.1           | JQ703006.1; K1a+195; Asia_W; 33; A73G; T152C; T195C                 | 16573 | Asia_W              | K1a+195       | K            | K             | 33             |
| 1205 | JQ703007.1           | JQ703007.1; K1a4a1a1; Asia_W; 39; A73G; T195C; A263G                | 16571 | Asia_W              | K1a4a1a1      | K            | K             | 39             |
| 1206 | JQ703008.1           | JQ703008.1; K1b1a1; Asia_W; 42; A73G; T152C; A263G                  | 16572 | Asia_W              | K1b1a1        | K            | K             | 42             |
| 1207 | JQ703009.1           | JQ703009.1; T2b19b; Asia_W; 38; A73G; A263G; C315CC                 | 16567 | Asia_W              | T2b19b        | T            | T             | 38             |
| 1208 | JQ703010.1           | JQ703010.1; H10f; Asia_W_Europe; 12; A263G; C315CC; A750G           | 16569 | Asia_W_Europe       | H10f          | H            | H             | 12             |
| 1209 | JQ703011.1           | JQ703011.1; T2b9; Asia_W; 37; A73G; C150T; A263G                    | 16569 | Asia_W              | T2b9          | T            | T             | 37             |
| 1210 | JQ703012.1           | JQ703012.1; K1a1b1a; Asia_W; 35; A73G; A263G; C315CC                | 16569 | Asia_W              | K1a1b1a       | K            | K             | 35             |
| 1211 | JQ703013.1           | JQ703013.1; W1+119; Asia_W; 36; A73G; T119C; A189G                  | 16561 | Asia_W              | W1+119        | W            | W             | 36             |
| 1212 | JQ703014.1           | JQ703014.1; H4a1a1a; Asia_W_Europe; 20; A73G; A263G; C309CCT        | 16568 | Asia_W_Europe       | H4a1a1a       | H            | H             | 20             |
| 1213 | JQ703015.1           | JQ703015.1; C7a; Asia_NE_America_N_S; 42; C44CC; A73G; A249d        | 16569 | Asia_NE_America_N_S | C7a           | C            | C             | 42             |
| 1214 | JQ703016.1           | JQ703016.1; H23; Asia_W_Europe; 10; T72C; A263G; C315CC             | 16569 | Asia_W_Europe       | H23           | H            | H             | 10             |
| 1215 | JQ703017.1           | JQ703017.1; H2a1a; Asia_W_Europe; 12; T152C; A263G; C309CCT         | 16572 | Asia_W_Europe       | H2a1a         | H            | H             | 12             |
| 1216 | JQ703018.1           | JQ703018.1; K2a5; Asia_W; 35; A73G; T146C; T152C                    | 16569 | Asia_W              | K2a5          | K            | K             | 35             |
| 1217 | JQ703019.1           | JQ703019.1; K1c2; Asia_W; 38; A73G; T146C; T152C                    | 16568 | Asia_W              | K1c2          | K            | K             | 38             |
| 1218 | JQ703020.1           | JQ703020.1; H2a2a1; Asia_W_Europe; 3; A183G; C315CC; A16207G        | 16569 | Asia_W_Europe       | H2a2a1        | H            | H             | 3              |
| 1219 | JQ703021.1           | JQ703021.1; K1b2a3; Asia_W; 35; A73G; T146C; T195C                  | 16575 | Asia_W              | K1b2a3        | K            | K             | 35             |
| 1220 | JQ703022.1           | JQ703022.1; H3; Asia_W_Europe; 10; A263G; C315CC; A750G             | 16569 | Asia_W_Europe       | H3            | H            | H             | 10             |
| 1221 | JQ703023.1           | JQ703023.1; T2b5a1; Asia_W; 36; A73G; A263G; C315CC                 | 16569 | Asia_W              | T2b5a1        | T            | T             | 36             |
| 1222 | JQ703024.1           | JQ703024.1; I2c; Asia_W_SW; 39; A73G; T152C; T199C                  | 16571 | Asia_W_SW           | I2c           | I            | I             | 39             |
| 1223 | JQ703025.1           | JQ703025.1; K1a4d; Asia_W; 37; A73G; A153G; A263G                   | 16572 | Asia_W              | K1a4d         | K            | K             | 37             |
| 1224 | JQ703026.1           | JQ703026.1; K1a2a; Asia_W; 36; A73G; A263G; C309CCT                 | 16572 | Asia_W              | K1a2a         | K            | K             | 36             |
| 1225 | JQ703027.1           | JQ703027.1; U5b2a2c; Asia_W_Europe_C; 35; A73G; C150T; A263G        | 16569 | Asia_W_Europe_C     | U5b2a2c       | U            | U5            | 35             |
| 1226 | JQ703028.1           | JQ703028.1; H6a1a3; Asia_W_Europe; 17; T239C; A263G; C309CCCT       | 16571 | Asia_W_Europe       | H6a1a3        | H            | H             | 17             |
| 1227 | JQ703029.1           | JQ703029.1; J1c1b1; Asia_W; 36; C64T; A73G; G185A                   | 16569 | Asia_W              | J1c1b1        | J            | J             | 36             |
| 1228 | JQ703030.1           | JQ703030.1; T2c1a1; Asia_W; 41; A73G; T152C; A263G                  | 16570 | Asia_W              | T2c1a1        | T            | T             | 41             |
| 1229 | JQ703031.1           | JQ703031.1; T2b; Asia_W; 36; A73G; C140T; A263G                     | 16570 | Asia_W              | T2b           | T            | T             | 36             |
| 1230 | JQ703032.1           | JQ703032.1; T1a1a1; Asia_W; 37; A73G; T152C; T195C                  | 16570 | Asia_W              | T1a1a1        | T            | T             | 37             |

**Supplementary Table S3** Human mitochondrial database (hMITO DB v1.0) metadata

| Row  | Name (accession no.) | Description                                                    | Size  | Geo_Region           | Haplogroup | Macro_Haplo | Macro_Haplo2 | Total Variants |
|------|----------------------|----------------------------------------------------------------|-------|----------------------|------------|-------------|--------------|----------------|
| 1231 | JQ703033.1           | JQ703033.1; K1b2a; Asia_W; 35; A73G; T146C; T195C              | 16573 | Asia_W               | K1b2a      | K           | K            | 35             |
| 1232 | JQ703034.1           | JQ703034.1; K1a4d; Asia_W; 34; A73G; A263G; C315CC             | 16569 | Asia_W               | K1a4d      | K           | K            | 34             |
| 1233 | JQ703035.1           | JQ703035.1; H13a1a1; Asia_W_Europe; 15; A263G; C309CCT; T310C  | 16570 | Asia_W_Europe        | H13a1a1    | H           | H            | 15             |
| 1234 | JQ703036.1           | JQ703036.1; L1b1a3b; Africa_C; 82; A73G; T152C; C182T          | 16567 | Africa_C             | L1b1a3b    | L1          | L1           | 82             |
| 1235 | JQ703037.1           | JQ703037.1; K1a2c; Asia_W; 39; A73G; T152C; A263G              | 16573 | Asia_W               | K1a2c      | K           | K            | 39             |
| 1236 | JQ703038.1           | JQ703038.1; K2b1a; Asia_W; 36; A73G; T146C; A263G              | 16569 | Asia_W               | K2b1a      | K           | K            | 36             |
| 1237 | JQ703039.1           | JQ703039.1; K2a3; Asia_W; 33; A73G; T146C; T152C               | 16570 | Asia_W               | K2a3       | K           | K            | 33             |
| 1238 | JQ703040.1           | JQ703040.1; N1a3a; Africa_NE_Asia_W; 33; A73G; A189G; T195C    | 16569 | Africa_NE_Asia_W     | N1a3a      | N           | N1           | 33             |
| 1239 | JQ703041.1           | JQ703041.1; K1a2a; Asia_W; 36; A73G; A263G; C315CC             | 16571 | Asia_W               | K1a2a      | K           | K            | 36             |
| 1240 | JQ703042.1           | JQ703042.1; T2b13b; Asia_W; 36; A73G; A263G; C309CCT           | 16570 | Asia_W               | T2b13b     | T           | T            | 36             |
| 1241 | JQ703043.1           | JQ703043.1; H3g; Asia_W_Europe; 12; T152C; A263G; C315CC       | 16569 | Asia_W_Europe        | H3g        | H           | H            | 12             |
| 1242 | JQ703044.1           | JQ703044.1; K1c2; Asia_W; 35; A73G; T146C; T152C               | 16569 | Asia_W               | K1c2       | K           | K            | 35             |
| 1243 | JQ703045.1           | JQ703045.1; N9a3; Africa_NE_Asia_E; 28; A73G; T146C; C150T     | 16570 | Africa_NE_Asia_E     | N9a3       | N           | N9           | 28             |
| 1244 | JQ703046.1           | JQ703046.1; U8a1a2; Asia_W_Europe ; 31; A73G; C150T; A263G     | 16570 | Asia_W_Europe        | U8a1a2     | U           | U8           | 31             |
| 1245 | JQ703047.1           | JQ703047.1; J1c3; Asia_W; 29; A73G; G185A; G228A               | 16569 | Asia_W               | J1c3       | J           | J            | 29             |
| 1246 | JQ703048.1           | JQ703048.1; K1a4d; Asia_W; 36; A73G; A263G; C315CC             | 16571 | Asia_W               | K1a4d      | K           | K            | 36             |
| 1247 | JQ703049.1           | JQ703049.1; K2a6; Asia_W; 33; A73G; T146C; T152C               | 16569 | Asia_W               | K2a6       | K           | K            | 33             |
| 1248 | JQ703050.1           | JQ703050.1; K2a; Asia_W; 32; A73G; T146C; T152C                | 16570 | Asia_W               | K2a        | K           | K            | 32             |
| 1249 | JQ703051.1           | JQ703051.1; K1a+195; Asia_W; 32; A73G; T195C; A263G            | 16571 | Asia_W               | K1a+195    | K           | K            | 32             |
| 1250 | JQ703052.1           | JQ703052.1; H1a; Asia_W_Europe; 13; A73G; A263G; C309CCT       | 16570 | Asia_W_Europe        | H1a        | H           | H            | 13             |
| 1251 | JQ703053.1           | JQ703053.1; H13a1a1; Asia_W_Europe; 20; A263G; C309CCT; T310C  | 16568 | Asia_W_Europe        | H13a1a1    | H           | H            | 20             |
| 1252 | JQ703054.1           | JQ703054.1; K1c1b; Asia_W; 36; A73G; T146C; T152C              | 16568 | Asia_W               | K1c1b      | K           | K            | 36             |
| 1253 | JQ703055.1           | JQ703055.1; A2d1; Asia_NE_America_N; 37; C64T; A73G; T146C     | 16559 | Asia_NE_America_N    | A2d1       | A           | A            | 37             |
| 1254 | JQ703056.1           | JQ703056.1; H2a2b; Asia_W_Europe; 9; A263G; C309CCT; T310C     | 16570 | Asia_W_Europe        | H2a2b      | H           | H            | 9              |
| 1255 | JQ703057.1           | JQ703057.1; H5+16311; Asia_W_Europe; 12; C150T; A263G; C309CCT | 16570 | Asia_W_Europe        | H5+16311   | H           | H            | 12             |
| 1256 | JQ703058.1           | JQ703058.1; W3a1c; Asia_W; 38; A73G; A189G; C194T              | 16570 | Asia_W               | W3a1c      | W           | W            | 38             |
| 1257 | JQ703059.1           | JQ703059.1; HV; Asia_W; 16; T195C; A263G; C309CCT              | 16570 | Asia_W               | HV         | HV          | HV           | 16             |
| 1258 | JQ703060.1           | JQ703060.1; A2f1a; Asia_NE_America_N; 39; C64T; A73G; T146C    | 16567 | Asia_NE_America_N    | A2f1a      | A           | A            | 39             |
| 1259 | JQ703061.1           | JQ703061.1; H6a1a5; Asia_W_Europe; 18; T239C; A263G; C309CCCT  | 16573 | Asia_W_Europe        | H6a1a5     | H           | H            | 18             |
| 1260 | JQ703062.1           | JQ703062.1; T2b7a1; Asia_W; 40; A73G; T152C; A263G             | 16568 | Asia_W               | T2b7a1     | T           | T            | 40             |
| 1261 | JQ703063.1           | JQ703063.1; M1a1i; Africa_E_Nile Valley; 48; T63C; G66T; A73G  | 16569 | Africa_E_Nile Valley | M1a1i      | M           | M1           | 48             |
| 1262 | JQ703064.1           | JQ703064.1; K2b1b; Asia_W; 38; A73G; T146C; T195C              | 16569 | Asia_W               | K2b1b      | K           | K            | 38             |
| 1263 | JQ703065.1           | JQ703065.1; L2a1n; Africa_W_C; 54; A73G; G143A; T146C          | 16568 | Africa_W_C           | L2a1n      | L2          | L2           | 54             |
| 1264 | JQ703066.1           | JQ703066.1; K2b1a1; Asia_W; 36; A73G; T146C; A263G             | 16569 | Asia_W               | K2b1a1     | K           | K            | 36             |
| 1265 | JQ703067.1           | JQ703067.1; K1c2; Asia_W; 35; A73G; T146C; T152C               | 16568 | Asia_W               | K1c2       | K           | K            | 35             |
| 1266 | JQ703068.1           | JQ703068.1; H2a2b; Asia_W_Europe; 11; A263G; C309CCT; T310C    | 16570 | Asia_W_Europe        | H2a2b      | H           | H            | 11             |
| 1267 | JQ703069.1           | JQ703069.1; K1a1b1a; Asia_W; 38; A73G; C114T; A263G            | 16569 | Asia_W               | K1a1b1a    | K           | K            | 38             |
| 1268 | JQ703070.1           | JQ703070.1; H46a; Asia_W_Europe; 14; T152C; A263G; C309CCT     | 16568 | Asia_W_Europe        | H46a       | H           | H            | 14             |
| 1269 | JQ703071.1           | JQ703071.1; H11a2a2; Asia_W_Europe; 19; T195C; A263G; C315CC   | 16569 | Asia_W_Europe        | H11a2a2    | H           | H            | 19             |
| 1270 | JQ703072.1           | JQ703072.1; K2a2a1; Asia_W; 37; A73G; T146C; T152C             | 16569 | Asia_W               | K2a2a1     | K           | K            | 37             |
| 1271 | JQ703073.1           | JQ703073.1; K1a1b2b; Asia_W; 39; A73G; A189G; T195C            | 16570 | Asia_W               | K1a1b2b    | K           | K            | 39             |

**Supplementary Table S3** Human mitochondrial database (hMITO DB v1.0) metadata

| Row  | Name (accession no.) | Description                                                     | Size  | Geo_Region           | Haplogroup | Macro_Haplo | Macro_Haplo2 | Total Variants |
|------|----------------------|-----------------------------------------------------------------|-------|----------------------|------------|-------------|--------------|----------------|
| 1272 | JQ703074.1           | JQ703074.1; U5a1b1a2; Asia_W_Europe_C; 32; A73G; A263G; C315CC  | 16569 | Asia_W_Europe_C      | U5a1b1a2   | U           | U5           | 32             |
| 1273 | JQ703075.1           | JQ703075.1; K1a9; Asia_W; 34; A73G; T152C; T195C                | 16570 | Asia_W               | K1a9       | K           | K            | 34             |
| 1274 | JQ703076.1           | JQ703076.1; W5; Asia_W; 40; A56ATC; TC63-; G66T                 | 16569 | Asia_W               | W5         | W           | W            | 40             |
| 1275 | JQ703077.1           | JQ703077.1; H52; Asia_W_Europe; 12; T152C; A263G; C309CCT       | 16570 | Asia_W_Europe        | H52        | H           | H            | 12             |
| 1276 | JQ703078.1           | JQ703078.1; H7d2a; Asia_W_Europe; 14; A263G; A291AA; C315CC     | 16570 | Asia_W_Europe        | H7d2a      | H           | H            | 14             |
| 1277 | JQ703079.1           | JQ703079.1; H15a1; Asia_W_Europe; 13; T55C; T57C; A263G         | 16571 | Asia_W_Europe        | H15a1      | H           | H            | 13             |
| 1278 | JQ703080.1           | JQ703080.1; H2a1a2; Asia_W_Europe; 16; T195C; A263G; C309CCT    | 16570 | Asia_W_Europe        | H2a1a2     | H           | H            | 16             |
| 1279 | JQ703081.1           | JQ703081.1; H2a5b; Asia_W_Europe; 9; A263G; C315CC; A512C       | 16569 | Asia_W_Europe        | H2a5b      | H           | H            | 9              |
| 1280 | JQ703082.1           | JQ703082.1; H10e; Asia_W_Europe; 13; A263G; C309CCT; T310C      | 16570 | Asia_W_Europe        | H10e       | H           | H            | 13             |
| 1281 | JQ703083.1           | JQ703083.1; T2b; Asia_W; 34; A73G; T195C; A263G                 | 16569 | Asia_W               | T2b        | T           | T            | 34             |
| 1282 | JQ703084.1           | JQ703084.1; W6a; Asia_W; 40; A73G; A189G; C194T                 | 16573 | Asia_W               | W6a        | W           | W            | 40             |
| 1283 | JQ703085.1           | JQ703085.1; K1a4d; Asia_W; 34; A73G; A263G; C315CC              | 16571 | Asia_W               | K1a4d      | K           | K            | 34             |
| 1284 | JQ703086.1           | JQ703086.1; M1b1a; Africa_E_Nile Valley; 45; A73G; T195C; A200G | 16569 | Africa_E_Nile Valley | M1b1a      | M           | M1           | 45             |
| 1285 | JQ703087.1           | JQ703087.1; U5a2b1d; Asia_W_Europe_C; 28; A73G; A263G; C315CC   | 16570 | Asia_W_Europe_C      | U5a2b1d    | U           | U5           | 28             |
| 1286 | JQ703088.1           | JQ703088.1; T2a1a; Asia_W; 34; A73G; A263G; C309CCT             | 16570 | Asia_W               | T2a1a      | T           | T            | 34             |
| 1287 | JQ703089.1           | JQ703089.1; H1af1a; Asia_W_Europe; 13; A263G; C315CC; A750G     | 16569 | Asia_W_Europe        | H1af1a     | H           | H            | 13             |
| 1288 | JQ703090.1           | JQ703090.1; HV1b2; Asia_W; 21; T152C; A263G; C309CCT            | 16570 | Asia_W               | HV1b2      | HV          | HV           | 21             |
| 1289 | JQ703091.1           | JQ703091.1; W1+119; Asia_W; 34; A73G; T119C; T152C              | 16569 | Asia_W               | W1+119     | W           | W            | 34             |
| 1290 | JQ703092.1           | JQ703092.1; H27c; Asia_W_Europe; 13; A263G; C309CCT; T310C      | 16570 | Asia_W_Europe        | H27c       | H           | H            | 13             |
| 1291 | JQ703093.1           | JQ703093.1; X2b4; Asia_W_America_N; 32; A73G; T195C; G225A      | 16570 | Asia_W_America_N     | X2b4       | X           | X            | 32             |
| 1292 | JQ703094.1           | JQ703094.1; H3y; Asia_W_Europe; 13; A263G; C309CCT; T310C       | 16570 | Asia_W_Europe        | H3y        | H           | H            | 13             |
| 1293 | JQ703095.1           | JQ703095.1; K1c2; Asia_W; 40; A73G; T146C; T152C                | 16568 | Asia_W               | K1c2       | K           | K            | 40             |
| 1294 | JQ703096.1           | JQ703096.1; K1a3a1; Asia_W; 36; A73G; T245C; A263G              | 16572 | Asia_W               | K1a3a1     | K           | K            | 36             |
| 1295 | JQ703097.1           | JQ703097.1; H26c; Asia_W_Europe; 12; T146C; T152C; A263G        | 16569 | Asia_W_Europe        | H26c       | H           | H            | 12             |
| 1296 | JQ703098.1           | JQ703098.1; H1ba; Asia_W_Europe; 12; C261T; A263G; C315CC       | 16570 | Asia_W_Europe        | H1ba       | H           | H            | 12             |
| 1297 | JQ703099.1           | JQ703099.1; T2b3c; Asia_W; 41; A73G; C151T; A263G               | 16569 | Asia_W               | T2b3c      | T           | T            | 41             |
| 1298 | JQ703100.1           | JQ703100.1; K1a+195; Asia_W; 35; A73G; T152C; T195C             | 16569 | Asia_W               | K1a+195    | K           | K            | 35             |
| 1299 | JQ703101.1           | JQ703101.1; H5a1; Asia_W_Europe; 15; A263G; C309CCT; T310C      | 16568 | Asia_W_Europe        | H5a1       | H           | H            | 15             |
| 1300 | JQ703102.1           | JQ703102.1; H3h7; Asia_W_Europe; 13; A93G; A263G; C315CC        | 16569 | Asia_W_Europe        | H3h7       | H           | H            | 13             |
| 1301 | JQ703103.1           | JQ703103.1; H6a1a; Asia_W_Europe; 21; A93G; T239C; A263G        | 16571 | Asia_W_Europe        | H6a1a      | H           | H            | 21             |
| 1302 | JQ703104.1           | JQ703104.1; H1c1; Asia_W_Europe; 14; A200G; A263G; C315CC       | 16569 | Asia_W_Europe        | H1c1       | H           | H            | 14             |
| 1303 | JQ703105.1           | JQ703105.1; H5a1; Asia_W_Europe; 16; A93G; A263G; C315CC        | 16567 | Asia_W_Europe        | H5a1       | H           | H            | 16             |
| 1304 | JQ703106.1           | JQ703106.1; I2e; Asia_W_SW; 35; A73G; T152C; T199C              | 16570 | Asia_W_SW            | I2e        | I           | I            | 35             |
| 1305 | JQ703107.1           | JQ703107.1; H27d; Asia_W_Europe; 14; A263G; C315CC; G380A       | 16569 | Asia_W_Europe        | H27d       | H           | H            | 14             |
| 1306 | JQ703108.1           | JQ703108.1; H16; Asia_W_Europe; 10; A263G; C315CC; A750G        | 16569 | Asia_W_Europe        | H16        | H           | H            | 10             |
| 1307 | JQ703109.1           | JQ703109.1; H1e1a; Asia_W_Europe; 15; A263G; C309CCT; T310C     | 16570 | Asia_W_Europe        | H1e1a      | H           | H            | 15             |
| 1308 | JQ703110.1           | JQ703110.1; H5s; Asia_W_Europe; 14; A263G; C309CCT; T310C       | 16571 | Asia_W_Europe        | H5s        | H           | H            | 14             |
| 1309 | JQ703111.1           | JQ703111.1; H55a; Asia_W_Europe; 13; A263G; C309CCT; T310C      | 16570 | Asia_W_Europe        | H55a       | H           | H            | 13             |
| 1310 | JQ703112.1           | JQ703112.1; H1+16189; Asia_W_Europe; 13; T152C; A263G; T310C    | 16568 | Asia_W_Europe        | H1+16189   | H           | H            | 13             |
| 1311 | JQ703113.1           | JQ703113.1; HV0+195; Asia_W; 13; T72C; T195C; A263G             | 16570 | Asia_W               | HV0+195    | HV          | HV           | 13             |
| 1312 | JQ703114.1           | JQ703114.1; U5a1b; Asia_W_Europe_C; 29; A73G; A201G; A263G      | 16579 | Asia_W_Europe_C      | U5a1b      | U           | U5           | 29             |



**Supplementary Table S3** Human mitochondrial database (hMITO DB v1.0) metadata

| Row  | Name (accession no.) | Description                                                      | Size  | Geo_Region    | Haplogroup | Macro_Haplo | Macro_Haplo2 | Total Variants |
|------|----------------------|------------------------------------------------------------------|-------|---------------|------------|-------------|--------------|----------------|
| 1313 | JQ703115.1           | JQ703115.1; H1e2c; Asia_W_Europe; 13; A73G; A263G; C315CC        | 16570 | Asia_W_Europe | H1e2c      | H           | H            | 13             |
| 1314 | JQ703116.1           | JQ703116.1; V2b; Europe_S; 17; T72C; T195C; A263G                | 16568 | Europe_S      | V2b        | V           | V            | 17             |
| 1315 | JQ703117.1           | JQ703117.1; H10a1; Asia_W_Europe; 12; T199C; A263G; C315CC       | 16569 | Asia_W_Europe | H10a1      | H           | H            | 12             |
| 1316 | JQ703118.1           | JQ703118.1; H3i; Asia_W_Europe; 11; T152C; A263G; C315CC         | 16569 | Asia_W_Europe | H3i        | H           | H            | 11             |
| 1317 | JQ703119.1           | JQ703119.1; H3z1; Asia_W_Europe; 14; A73G; A263G; T293C          | 16569 | Asia_W_Europe | H3z1       | H           | H            | 14             |
| 1318 | JQ703120.1           | JQ703120.1; H7; Asia_W_Europe; 14; T152C; A263G; C315CC          | 16569 | Asia_W_Europe | H7         | H           | H            | 14             |
| 1319 | JQ703121.1           | JQ703121.1; H1c2; Asia_W_Europe; 14; A263G; C315CC; T477C        | 16569 | Asia_W_Europe | H1c2       | H           | H            | 14             |
| 1320 | JQ703122.1           | JQ703122.1; K1c2a; Asia_W; 40; A73G; T146C; T152C                | 16567 | Asia_W        | K1c2a      | K           | K            | 40             |
| 1321 | JQ703123.1           | JQ703123.1; T2g1a1; Asia_W; 40; A73G; T152C; A200G               | 16569 | Asia_W        | T2g1a1     | T           | T            | 40             |
| 1322 | JQ703124.1           | JQ703124.1; K1c2; Asia_W; 37; A73G; T146C; T152C                 | 16568 | Asia_W        | K1c2       | K           | K            | 37             |
| 1323 | JQ703125.1           | JQ703125.1; H1e2c; Asia_W_Europe; 15; A73G; A200G; A263G         | 16569 | Asia_W_Europe | H1e2c      | H           | H            | 15             |
| 1324 | JQ703126.1           | JQ703126.1; H1c19; Asia_W_Europe; 11; A263G; C315CC; T477C       | 16569 | Asia_W_Europe | H1c19      | H           | H            | 11             |
| 1325 | JQ703127.1           | JQ703127.1; H4a1c1a; Asia_W_Europe; 19; A263G; C309CCT; T310C    | 16568 | Asia_W_Europe | H4a1c1a    | H           | H            | 19             |
| 1326 | JQ703128.1           | JQ703128.1; H24a; Asia_W_Europe; 10; A263G; C315CC; A750G        | 16569 | Asia_W_Europe | H24a       | H           | H            | 10             |
| 1327 | JQ703129.1           | JQ703129.1; H1af1b; Asia_W_Europe; 14; A263G; C309CCCT; T310C    | 16571 | Asia_W_Europe | H1af1b     | H           | H            | 14             |
| 1328 | JQ703130.1           | JQ703130.1; K1b1a1; Asia_W; 42; A73G; T152C; A263G               | 16571 | Asia_W        | K1b1a1     | K           | K            | 42             |
| 1329 | JQ703131.1           | JQ703131.1; H4a1a4b; Asia_W_Europe; 20; T195C; A263G; C315CC     | 16567 | Asia_W_Europe | H4a1a4b    | H           | H            | 20             |
| 1330 | JQ703132.1           | JQ703132.1; H1bk; Asia_W_Europe; 12; A263G; C309CCT; T310C       | 16568 | Asia_W_Europe | H1bk       | H           | H            | 12             |
| 1331 | JQ703133.1           | JQ703133.1; K1a; Asia_W; 39; A73G; T152C; A263G                  | 16572 | Asia_W        | K1a        | K           | K            | 39             |
| 1332 | JQ703134.1           | JQ703134.1; H4a1a4a; Asia_W_Europe; 20; T195C; A263G; C309CCT    | 16568 | Asia_W_Europe | H4a1a4a    | H           | H            | 20             |
| 1333 | JQ703135.1           | JQ703135.1; H1a3b; Asia_W_Europe; 16; A73G; T195C; A263G         | 16567 | Asia_W_Europe | H1a3b      | H           | H            | 16             |
| 1334 | JQ703136.1           | JQ703136.1; K2a7; Asia_W; 34; A73G; T146C; T152C                 | 16567 | Asia_W        | K2a7       | K           | K            | 34             |
| 1335 | JQ703137.1           | JQ703137.1; H1e4a; Asia_W_Europe; 13; A263G; C315CC; A750G       | 16569 | Asia_W_Europe | H1e4a      | H           | H            | 13             |
| 1336 | JQ703138.1           | JQ703138.1; L3e2b1a; Africa_E; 33; A73G; C150T; T195C            | 16569 | Africa_E      | L3e2b1a    | L3          | L3           | 33             |
| 1337 | JQ703139.1           | JQ703139.1; HV0+195; Asia_W; 17; T72C; T195C; A263G              | 16570 | Asia_W        | HV0+195    | HV          | HV           | 17             |
| 1338 | JQ703140.1           | JQ703140.1; H3ap; Asia_W_Europe; 11; A263G; C309CCT; T310C       | 16570 | Asia_W_Europe | H3ap       | H           | H            | 11             |
| 1339 | JQ703141.1           | JQ703141.1; H3b+16129; Asia_W_Europe; 12; A263G; C315CC; A523ACA | 16571 | Asia_W_Europe | H3b+16129  | H           | H            | 12             |
| 1340 | JQ703142.1           | JQ703142.1; H1c3a; Asia_W_Europe; 17; T146C; A257G; A263G        | 16570 | Asia_W_Europe | H1c3a      | H           | H            | 17             |
| 1341 | JQ703143.1           | JQ703143.1; H1; Asia_W_Europe; 14; A263G; C309CCT; T310C         | 16570 | Asia_W_Europe | H1         | H           | H            | 14             |
| 1342 | JQ703144.1           | JQ703144.1; H2a1a; Asia_W_Europe; 10; A263G; T293C; C315CC       | 16569 | Asia_W_Europe | H2a1a      | H           | H            | 10             |
| 1343 | JQ703145.1           | JQ703145.1; H2a1e; Asia_W_Europe; 9; A263G; C309CCT; T310C       | 16570 | Asia_W_Europe | H2a1e      | H           | H            | 9              |
| 1344 | JQ703146.1           | JQ703146.1; K2a3; Asia_W; 34; A73G; T146C; T152C                 | 16569 | Asia_W        | K2a3       | K           | K            | 34             |
| 1345 | JQ703147.1           | JQ703147.1; H1j6; Asia_W_Europe; 13; A263G; C315CC; G709A        | 16569 | Asia_W_Europe | H1j6       | H           | H            | 13             |
| 1346 | JQ703148.1           | JQ703148.1; H1bg; Asia_W_Europe; 13; A263G; C315CC; A750G        | 16569 | Asia_W_Europe | H1bg       | H           | H            | 13             |
| 1347 | JQ703149.1           | JQ703149.1; T2a1b1a1; Asia_W; 40; A73G; A263G; C315CC            | 16569 | Asia_W        | T2a1b1a1   | T           | T            | 40             |
| 1348 | JQ703150.1           | JQ703150.1; H5b1; Asia_W_Europe; 15; T146C; T195C; A263G         | 16570 | Asia_W_Europe | H5b1       | H           | H            | 15             |
| 1349 | JQ703151.1           | JQ703151.1; H1ae1; Asia_W_Europe; 13; A263G; C315CC; A750G       | 16569 | Asia_W_Europe | H1ae1      | H           | H            | 13             |
| 1350 | JQ703152.1           | JQ703152.1; H5a1; Asia_W_Europe; 14; C186T; A263G; C315CC        | 16567 | Asia_W_Europe | H5a1       | H           | H            | 14             |
| 1351 | JQ703153.1           | JQ703153.1; H1c1+16093; Asia_W_Europe; 13; A263G; C315CC; T477C  | 16569 | Asia_W_Europe | H1c1+16093 | H           | H            | 13             |
| 1352 | JQ703154.1           | JQ703154.1; H27; Asia_W_Europe; 13; A263G; C315CC; A750G         | 16569 | Asia_W_Europe | H27        | H           | H            | 13             |
| 1353 | JQ703155.1           | JQ703155.1; H71; Asia_W_Europe; 15; A263G; C309CCCT; T310C       | 16571 | Asia_W_Europe | H71        | H           | H            | 15             |

**Supplementary Table S3** Human mitochondrial database (hMITO DB v1.0) metadata

| Row  | Name (accession no.) | Description                                                    | Size  | Geo_Region       | Haplogroup | Macro_Haplo | Macro_Haplo2 | Total Variants |
|------|----------------------|----------------------------------------------------------------|-------|------------------|------------|-------------|--------------|----------------|
| 1354 | JQ703156.1           | JQ703156.1; H2a2a1; Asia_W_Europe; 3; C315CC; G7805A; A8679G   | 16569 | Asia_W_Europe    | H2a2a1     | H           | H            | 3              |
| 1355 | JQ703157.1           | JQ703157.1; H35; Asia_W_Europe; 11; A263G; C309CCT; T310C      | 16571 | Asia_W_Europe    | H35        | H           | H            | 11             |
| 1356 | JQ703158.1           | JQ703158.1; H4a1c1a; Asia_W_Europe; 20; A263G; C309CCCT; T310C | 16568 | Asia_W_Europe    | H4a1c1a    | H           | H            | 20             |
| 1357 | JQ703159.1           | JQ703159.1; K1c2; Asia_W; 37; A73G; T146C; T152C               | 16568 | Asia_W           | K1c2       | K           | K            | 37             |
| 1358 | JQ703160.1           | JQ703160.1; K1a1a2a; Asia_W; 36; A73G; A263G; C315CC           | 16570 | Asia_W           | K1a1a2a    | K           | K            | 36             |
| 1359 | JQ703161.1           | JQ703161.1; H6a1a; Asia_W_Europe; 14; T239C; A263G; C309CCT    | 16570 | Asia_W_Europe    | H6a1a      | H           | H            | 14             |
| 1360 | JQ703162.1           | JQ703162.1; X2b+226; Asia_W_America_N; 35; A73G; T195C; C198T  | 16570 | Asia_W_America_N | X2b+226    | X           | X            | 35             |
| 1361 | JQ703163.1           | JQ703163.1; H11a; Asia_W_Europe; 15; G185A; T195C; A263G       | 16571 | Asia_W_Europe    | H11a       | H           | H            | 15             |
| 1362 | JQ703164.1           | JQ703164.1; HV+16311; Asia_W_Europe; 14; A263G; C309CCT; T310C | 16570 | Asia_W_Europe    | HV+16311   | H           | H            | 14             |
| 1363 | JQ703165.1           | JQ703165.1; K1a1b1a; Asia_W; 37; A73G; C114T; T152C            | 16569 | Asia_W           | K1a1b1a    | K           | K            | 37             |
| 1364 | JQ703166.1           | JQ703166.1; H1c2; Asia_W_Europe; 13; T195C; A263G; C315CC      | 16569 | Asia_W_Europe    | H1c2       | H           | H            | 13             |
| 1365 | JQ703167.1           | JQ703167.1; H11a; Asia_W_Europe; 16; T195C; A263G; C309CCT     | 16570 | Asia_W_Europe    | H11a       | H           | H            | 16             |
| 1366 | JQ703168.1           | JQ703168.1; K1a4a1a2; Asia_W; 39; A73G; A263G; C315CC          | 16571 | Asia_W           | K1a4a1a2   | K           | K            | 39             |
| 1367 | JQ703169.1           | JQ703169.1; H13a1a1a; Asia_W_Europe; 17; T152C; A263G; C309CCT | 16570 | Asia_W_Europe    | H13a1a1a   | H           | H            | 17             |
| 1368 | JQ703170.1           | JQ703170.1; H1bb; Asia_W_Europe; 13; T152C; T199C; A263G       | 16569 | Asia_W_Europe    | H1bb       | H           | H            | 13             |
| 1369 | JQ703171.1           | JQ703171.1; K1a4a1b2; Asia_W; 35; A73G; A263G; C309CCT         | 16570 | Asia_W           | K1a4a1b2   | K           | K            | 35             |
| 1370 | JQ703172.1           | JQ703172.1; H11a3; Asia_W_Europe; 15; T195C; A263G; C309CCT    | 16570 | Asia_W_Europe    | H11a3      | H           | H            | 15             |
| 1371 | JQ703173.1           | JQ703173.1; H2a2a2; Asia_W_Europe; 6; T152C; A263G; C309CCT    | 16570 | Asia_W_Europe    | H2a2a2     | H           | H            | 6              |
| 1372 | JQ703174.1           | JQ703174.1; H1c6; Asia_W_Europe; 12; A263G; C309CCT; T310C     | 16570 | Asia_W_Europe    | H1c6       | H           | H            | 12             |
| 1373 | JQ703175.1           | JQ703175.1; H11a2; Asia_W_Europe; 18; T195C; A263G; C315CC     | 16569 | Asia_W_Europe    | H11a2      | H           | H            | 18             |
| 1374 | JQ703176.1           | JQ703176.1; H1bk; Asia_W_Europe; 13; A93G; A95C; A263G         | 16567 | Asia_W_Europe    | H1bk       | H           | H            | 13             |
| 1375 | JQ703177.1           | JQ703177.1; H7c3; Asia_W_Europe; 14; A263G; C309CCT; T310C     | 16570 | Asia_W_Europe    | H7c3       | H           | H            | 14             |
| 1376 | JQ703178.1           | JQ703178.1; H72; Asia_W_Europe; 13; A263G; C315CC; A750G       | 16569 | Asia_W_Europe    | H72        | H           | H            | 13             |
| 1377 | JQ703179.1           | JQ703179.1; H3p; Asia_W_Europe; 17; T146C; A200G; A263G        | 16570 | Asia_W_Europe    | H3p        | H           | H            | 17             |
| 1378 | JQ703180.1           | JQ703180.1; HV6; Asia_W; 15; A263G; C309CCT; T310C             | 16570 | Asia_W           | HV6        | HV          | HV           | 15             |
| 1379 | JQ703181.1           | JQ703181.1; H66a1; Asia_W_Europe; 12; A263G; C315CC; A750G     | 16569 | Asia_W_Europe    | H66a1      | H           | H            | 12             |
| 1380 | JQ703182.1           | JQ703182.1; J1b1a1e; Asia_W; 40; A73G; T146C; C242T            | 16570 | Asia_W           | J1b1a1e    | J           | J            | 40             |
| 1381 | JQ703183.1           | JQ703183.1; H11a2a1; Asia_W_Europe; 17; T195C; A263G; C309CCT  | 16570 | Asia_W_Europe    | H11a2a1    | H           | H            | 17             |
| 1382 | JQ703184.1           | JQ703184.1; K2b1a; Asia_W; 35; A73G; T146C; A263G              | 16569 | Asia_W           | K2b1a      | K           | K            | 35             |
| 1383 | JQ703185.1           | JQ703185.1; H3v1; Asia_W_Europe; 15; A263G; C315CC; T408A      | 16569 | Asia_W_Europe    | H3v1       | H           | H            | 15             |
| 1384 | JQ703186.1           | JQ703186.1; H5c2; Asia_W_Europe; 12; A263G; C315CC; C456T      | 16569 | Asia_W_Europe    | H5c2       | H           | H            | 12             |
| 1385 | JQ703187.1           | JQ703187.1; U5a2c; Asia_W_Europe_C; 25; A73G; A263G; C315CC    | 16569 | Asia_W_Europe_C  | U5a2c      | U           | U5           | 25             |
| 1386 | JQ703188.1           | JQ703188.1; H17a1; Asia_W_Europe; 14; A263G; C309CCT; T310C    | 16570 | Asia_W_Europe    | H17a1      | H           | H            | 14             |
| 1387 | JQ703189.1           | JQ703189.1; K1c1g; Asia_W; 36; A73G; T146C; T152C              | 16569 | Asia_W           | K1c1g      | K           | K            | 36             |
| 1388 | JQ703190.1           | JQ703190.1; H1e2c; Asia_W_Europe; 14; A73G; A263G; C309CCT     | 16572 | Asia_W_Europe    | H1e2c      | H           | H            | 14             |
| 1389 | JQ703191.1           | JQ703191.1; H2a2; Asia_W_Europe; 8; A263G; C309CCCT; T310C     | 16571 | Asia_W_Europe    | H2a2       | H           | H            | 8              |
| 1390 | JQ703192.1           | JQ703192.1; H2a3b; Asia_W_Europe; 10; A263G; C315CC; A750G     | 16569 | Asia_W_Europe    | H2a3b      | H           | H            | 10             |
| 1391 | JQ703193.1           | JQ703193.1; H13a1a3; Asia_W_Europe; 16; A263G; C309CCCT; T310C | 16571 | Asia_W_Europe    | H13a1a3    | H           | H            | 16             |
| 1392 | JQ703194.1           | JQ703194.1; K1b1a2; Asia_W; 45; A73G; T152C; T195C             | 16571 | Asia_W           | K1b1a2     | K           | K            | 45             |
| 1393 | JQ703195.1           | JQ703195.1; H4a1a4b; Asia_W_Europe; 20; T195C; A263G; C315CC   | 16567 | Asia_W_Europe    | H4a1a4b    | H           | H            | 20             |
| 1394 | JQ703196.1           | JQ703196.1; H1e4; Asia_W_Europe; 11; A263G; C315CC; A750G      | 16569 | Asia_W_Europe    | H1e4       | H           | H            | 11             |

**Supplementary Table S3** Human mitochondrial database (hMITO DB v1.0) metadata

| Row  | Name (accession no.) | Description                                                    | Size  | Geo_Region        | Haplogroup | Macro_Haplo | Macro_Haplo2 | Total Variants |
|------|----------------------|----------------------------------------------------------------|-------|-------------------|------------|-------------|--------------|----------------|
| 1395 | JQ703197.1           | JQ703197.1; K2b1b; Asia_W; 40; A73G; T146C; T195C              | 16569 | Asia_W            | K2b1b      | K           | K            | 40             |
| 1396 | JQ703198.1           | JQ703198.1; H1bb; Asia_W_Europe; 13; T152C; A263G; C315CC      | 16571 | Asia_W_Europe     | H1bb       | H           | H            | 13             |
| 1397 | JQ703199.1           | JQ703199.1; H1+16239; Asia_W_Europe; 11; A263G; C315CC; A750G  | 16569 | Asia_W_Europe     | H1+16239   | H           | H            | 11             |
| 1398 | JQ703200.1           | JQ703200.1; K1c2; Asia_W; 38; A73G; T146C; T152C               | 16569 | Asia_W            | K1c2       | K           | K            | 38             |
| 1399 | JQ703201.1           | JQ703201.1; H27; Asia_W_Europe; 12; A263G; C309CCCT; T310C     | 16571 | Asia_W_Europe     | H27        | H           | H            | 12             |
| 1400 | JQ703202.1           | JQ703202.1; HV9; Asia_W; 13; A263G; C309CCT; T310C             | 16570 | Asia_W            | HV9        | HV          | HV           | 13             |
| 1401 | JQ703203.1           | JQ703203.1; U2e1a1b; Asia_S_W_Europe; 42; A73G; A108G; T152C   | 16570 | Asia_S_W_Europe   | U2e1a1b    | U           | U2           | 42             |
| 1402 | JQ703204.1           | JQ703204.1; H2a1b1; Asia_W_Europe; 11; A210G; A263G; C309CCCT  | 16571 | Asia_W_Europe     | H2a1b1     | H           | H            | 11             |
| 1403 | JQ703205.1           | JQ703205.1; H6a1a3a; Asia_W_Europe; 18; T195C; T239C; A263G    | 16571 | Asia_W_Europe     | H6a1a3a    | H           | H            | 18             |
| 1404 | JQ703206.1           | JQ703206.1; K1b2b; Asia_W; 39; A73G; T146C; T195C              | 16572 | Asia_W            | K1b2b      | K           | K            | 39             |
| 1405 | JQ703207.1           | JQ703207.1; H1e2b; Asia_W_Europe; 14; A263G; C309CCCT; T310C   | 16571 | Asia_W_Europe     | H1e2b      | H           | H            | 14             |
| 1406 | JQ703208.1           | JQ703208.1; H13a1a2a; Asia_W_Europe; 20; A263G; C309CCT; T310C | 16570 | Asia_W_Europe     | H13a1a2a   | H           | H            | 20             |
| 1407 | JQ703209.1           | JQ703209.1; H2a2b1a1; Asia_W_Europe; 11; A263G; C309CCT; T310C | 16570 | Asia_W_Europe     | H2a2b1a1   | H           | H            | 11             |
| 1408 | JQ703210.1           | JQ703210.1; H4a1a4b2; Asia_W_Europe; 21; T195C; A263G; C315CC  | 16567 | Asia_W_Europe     | H4a1a4b2   | H           | H            | 21             |
| 1409 | JQ703211.1           | JQ703211.1; J1b2; Asia_W; 32; A73G; C150T; T152C               | 16569 | Asia_W            | J1b2       | J           | J            | 32             |
| 1410 | JQ703212.1           | JQ703212.1; K1a4a1a2; Asia_W; 40; A73G; A263G; C309CCT         | 16573 | Asia_W            | K1a4a1a2   | K           | K            | 40             |
| 1411 | JQ703213.1           | JQ703213.1; H2a1a; Asia_W_Europe; 12; T152C; A263G; C309CCT    | 16568 | Asia_W_Europe     | H2a1a      | H           | H            | 12             |
| 1412 | JQ703214.1           | JQ703214.1; H2a1e1a1; Asia_W_Europe; 12; A263G; C315CC; C575T  | 16569 | Asia_W_Europe     | H2a1e1a1   | H           | H            | 12             |
| 1413 | JQ703215.1           | JQ703215.1; V14; Europe_S; 17; T72C; A263G; C315CC             | 16569 | Europe_S          | V14        | V           | V            | 17             |
| 1414 | JQ703216.1           | JQ703216.1; H1q; Asia_W_Europe; 12; A263G; C315CC; A523ACACA   | 16573 | Asia_W_Europe     | H1q        | H           | H            | 12             |
| 1415 | JQ703217.1           | JQ703217.1; H7a1b; Asia_W_Europe; 13; A263G; C309CCT; T310C    | 16570 | Asia_W_Europe     | H7a1b      | H           | H            | 13             |
| 1416 | JQ703218.1           | JQ703218.1; H1j; Asia_W_Europe; 13; A263G; C309CCT; T310C      | 16570 | Asia_W_Europe     | H1j        | H           | H            | 13             |
| 1417 | JQ703219.1           | JQ703219.1; H1h1; Asia_W_Europe; 15; A263G; C309CCT; T310C     | 16570 | Asia_W_Europe     | H1h1       | H           | H            | 15             |
| 1418 | JQ703220.1           | JQ703220.1; H1y; Asia_W_Europe; 13; A263G; C309CCT; T310C      | 16570 | Asia_W_Europe     | H1y        | H           | H            | 13             |
| 1419 | JQ703221.1           | JQ703221.1; H3; Asia_W_Europe; 13; A263G; C309CCT; T310C       | 16570 | Asia_W_Europe     | H3         | H           | H            | 13             |
| 1420 | JQ703222.1           | JQ703222.1; H1+16355; Asia_W_Europe; 13; A263G; C315CC; A750G  | 16569 | Asia_W_Europe     | H1+16355   | H           | H            | 13             |
| 1421 | JQ703223.1           | JQ703223.1; H2a1b2; Asia_W_Europe; 13; T72G; A263G; C309CCT    | 16570 | Asia_W_Europe     | H2a1b2     | H           | H            | 13             |
| 1422 | JQ703224.1           | JQ703224.1; H1at1; Asia_W_Europe; 12; A263G; C309CCT; T310C    | 16570 | Asia_W_Europe     | H1at1      | H           | H            | 12             |
| 1423 | JQ703225.1           | JQ703225.1; A2+(64); Asia_NE_America_N; 35; C64T; A73G; T146C  | 16567 | Asia_NE_America_N | A2+(64)    | A           | A            | 35             |
| 1424 | JQ703226.1           | JQ703226.1; H1e1a; Asia_W_Europe; 14; A263G; C309CCCT; T310C   | 16571 | Asia_W_Europe     | H1e1a      | H           | H            | 14             |
| 1425 | JQ703227.1           | JQ703227.1; U5a1b1d1; Asia_W_Europe_C; 29; A73G; C198T; A263G  | 16569 | Asia_W_Europe_C   | U5a1b1d1   | U           | U5           | 29             |
| 1426 | JQ703228.1           | JQ703228.1; H5+16192; Asia_W_Europe; 12; A263G; C315CC; C456T  | 16569 | Asia_W_Europe     | H5+16192   | H           | H            | 12             |
| 1427 | JQ703229.1           | JQ703229.1; A2f2; Asia_NE_America_N; 34; C64T; A73G; A153G     | 16567 | Asia_NE_America_N | A2f2       | A           | A            | 34             |
| 1428 | JQ703230.1           | JQ703230.1; H3q; Asia_W_Europe; 11; A263G; C315CC; A750G       | 16569 | Asia_W_Europe     | H3q        | H           | H            | 11             |
| 1429 | JQ703231.1           | JQ703231.1; H1g1; Asia_W_Europe; 14; T152C; A263G; C315CC      | 16569 | Asia_W_Europe     | H1g1       | H           | H            | 14             |
| 1430 | JQ703232.1           | JQ703232.1; H6a2; Asia_W_Europe; 16; T239C; A263G; C309CCCT    | 16571 | Asia_W_Europe     | H6a2       | H           | H            | 16             |
| 1431 | JQ703233.1           | JQ703233.1; H7a2; Asia_W_Europe; 15; A263G; C309CCT; T310C     | 16579 | Asia_W_Europe     | H7a2       | H           | H            | 15             |
| 1432 | JQ703234.1           | JQ703234.1; H41a; Asia_W_Europe; 14; C262T; A263G; C309CCT     | 16570 | Asia_W_Europe     | H41a       | H           | H            | 14             |
| 1433 | JQ703235.1           | JQ703235.1; H11a3; Asia_W_Europe; 15; T195C; A263G; C309CCT    | 16570 | Asia_W_Europe     | H11a3      | H           | H            | 15             |
| 1434 | JQ703236.1           | JQ703236.1; H5a1; Asia_W_Europe; 13; C150T; A263G; C315CC      | 16567 | Asia_W_Europe     | H5a1       | H           | H            | 13             |
| 1435 | JQ703237.1           | JQ703237.1; H10a1b; Asia_W_Europe; 16; A263G; C309CCT; T310C   | 16570 | Asia_W_Europe     | H10a1b     | H           | H            | 16             |

**Supplementary Table S3** Human mitochondrial database (hMITO DB v1.0) metadata

| Row  | Name (accession no.) | Description                                                   | Size  | Geo_Region    | Haplogroup | Macro_ Haplo | Macro_ Haplo2 | Total Variants |
|------|----------------------|---------------------------------------------------------------|-------|---------------|------------|--------------|---------------|----------------|
| 1436 | JQ703238.1           | JQ703238.1; H1a4; Asia_W_Europe; 15; A73G; A263G; C309CCT     | 16570 | Asia_W_Europe | H1a4       | H            | H             | 15             |
| 1437 | JQ703239.1           | JQ703239.1; H26; Asia_W_Europe; 11; A263G; C309CCT; T310C     | 16570 | Asia_W_Europe | H26        | H            | H             | 11             |
| 1438 | JQ703240.1           | JQ703240.1; T1a1; Asia_W; 37; A73G; T152C; T195C              | 16570 | Asia_W        | T1a1       | T            | T             | 37             |
| 1439 | JQ703241.1           | JQ703241.1; H5b2; Asia_W_Europe; 13; A263G; C309CCT; T310C    | 16570 | Asia_W_Europe | H5b2       | H            | H             | 13             |
| 1440 | JQ703242.1           | JQ703242.1; W1; Asia_W; 34; A73G; A189G; T195C                | 16570 | Asia_W        | W1         | W            | W             | 34             |
| 1441 | JQ703243.1           | JQ703243.1; H1j1a; Asia_W_Europe; 16; A93G; A263G; C309CCCT   | 16571 | Asia_W_Europe | H1j1a      | H            | H             | 16             |
| 1442 | JQ703244.1           | JQ703244.1; H1bt1; Asia_W_Europe; 12; A263G; C315CC; A750G    | 16569 | Asia_W_Europe | H1bt1      | H            | H             | 12             |
| 1443 | JQ703245.1           | JQ703245.1; H1y; Asia_W_Europe; 14; A263G; C309CCT; T310C     | 16570 | Asia_W_Europe | H1y        | H            | H             | 14             |
| 1444 | JQ703246.1           | JQ703246.1; H3g2; Asia_W_Europe; 14; T152C; T204C; A263G      | 16569 | Asia_W_Europe | H3g2       | H            | H             | 14             |
| 1445 | JQ703247.1           | JQ703247.1; H8c; Asia_W_Europe; 19; T146C; T152C; T195C       | 16571 | Asia_W_Europe | H8c        | H            | H             | 19             |
| 1446 | JQ703248.1           | JQ703248.1; H95a; Asia_W_Europe; 14; A263G; C315CC; A750G     | 16569 | Asia_W_Europe | H95a       | H            | H             | 14             |
| 1447 | JQ703249.1           | JQ703249.1; J1b1a1a; Asia_W; 40; A73G; A215G; C242T           | 16570 | Asia_W        | J1b1a1a    | J            | J             | 40             |
| 1448 | JQ703250.1           | JQ703250.1; HV1b2; Asia_W; 21; T152C; A263G; C309CCT          | 16570 | Asia_W        | HV1b2      | HV           | HV            | 21             |
| 1449 | JQ703251.1           | JQ703251.1; H1i2; Asia_W_Europe; 14; T152C; A263G; C315CC     | 16569 | Asia_W_Europe | H1i2       | H            | H             | 14             |
| 1450 | JQ703252.1           | JQ703252.1; H14a; Asia_W_Europe; 16; A263G; C309CCT; T310C    | 16569 | Asia_W_Europe | H14a       | H            | H             | 16             |
| 1451 | JQ703253.1           | JQ703253.1; H11a+152; Asia_W_Europe; 14; T152C; T195C; A263G  | 16569 | Asia_W_Europe | H11a+152   | H            | H             | 14             |
| 1452 | JQ703254.1           | JQ703254.1; H1b1f; Asia_W_Europe; 15; A263G; C315CC; CA522d   | 16567 | Asia_W_Europe | H1b1f      | H            | H             | 15             |
| 1453 | JQ703255.1           | JQ703255.1; K1a; Asia_W; 32; A73G; A263G; C309CCT             | 16572 | Asia_W        | K1a        | K            | K             | 32             |
| 1454 | JQ703256.1           | JQ703256.1; H1au1a; Asia_W_Europe; 12; A263G; C315CC; A750G   | 16569 | Asia_W_Europe | H1au1a     | H            | H             | 12             |
| 1455 | JQ703257.1           | JQ703257.1; H5; Asia_W_Europe; 11; A263G; C315CC; C456T       | 16569 | Asia_W_Europe | H5         | H            | H             | 11             |
| 1456 | JQ703258.1           | JQ703258.1; H3k; Asia_W_Europe; 13; T152C; T195C; A263G       | 16570 | Asia_W_Europe | H3k        | H            | H             | 13             |
| 1457 | JQ703259.1           | JQ703259.1; H11a1; Asia_W_Europe; 15; T195C; A263G; C315CC    | 16569 | Asia_W_Europe | H11a1      | H            | H             | 15             |
| 1458 | JQ703260.1           | JQ703260.1; H3v2; Asia_W_Europe; 17; A73G; A263G; C315CC      | 16569 | Asia_W_Europe | H3v2       | H            | H             | 17             |
| 1459 | JQ703261.1           | JQ703261.1; K1c1b; Asia_W; 35; A73G; T146C; T152C             | 16569 | Asia_W        | K1c1b      | K            | K             | 35             |
| 1460 | JQ703262.1           | JQ703262.1; H1aj; Asia_W_Europe; 13; A263G; C309CCT; T310C    | 16570 | Asia_W_Europe | H1aj       | H            | H             | 13             |
| 1461 | JQ703263.1           | JQ703263.1; T2b22; Asia_W; 38; A73G; T152C; A263G             | 16570 | Asia_W        | T2b22      | T            | T             | 38             |
| 1462 | JQ703264.1           | JQ703264.1; H58; Asia_W_Europe; 12; T146C; A263G; C315CC      | 16569 | Asia_W_Europe | H58        | H            | H             | 12             |
| 1463 | JQ703265.1           | JQ703265.1; H3j; Asia_W_Europe; 12; T152C; A263G; C315CC      | 16569 | Asia_W_Europe | H3j        | H            | H             | 12             |
| 1464 | JQ703266.1           | JQ703266.1; H5s; Asia_W_Europe; 14; A263G; C309CCT; T310C     | 16570 | Asia_W_Europe | H5s        | H            | H             | 14             |
| 1465 | JQ703267.1           | JQ703267.1; K1a+195; Asia_W; 36; A73G; T195C; A263G           | 16571 | Asia_W        | K1a+195    | K            | K             | 36             |
| 1466 | JQ703268.1           | JQ703268.1; H1b2a1; Asia_W_Europe; 19; A183G; A263G; C309CCCT | 16573 | Asia_W_Europe | H1b2a1     | H            | H             | 19             |
| 1467 | JQ703269.1           | JQ703269.1; H5a1; Asia_W_Europe; 13; A263G; C315CC; C456T     | 16567 | Asia_W_Europe | H5a1       | H            | H             | 13             |
| 1468 | JQ703270.1           | JQ703270.1; H1i; Asia_W_Europe; 15; T152C; T252C; A263G       | 16570 | Asia_W_Europe | H1i        | H            | H             | 15             |
| 1469 | JQ703271.1           | JQ703271.1; H6a1a; Asia_W_Europe; 15; T239C; A263G; C315CC    | 16569 | Asia_W_Europe | H6a1a      | H            | H             | 15             |
| 1470 | JQ703272.1           | JQ703272.1; H3ad; Asia_W_Europe; 10; A263G; C315CC; A750G     | 16569 | Asia_W_Europe | H3ad       | H            | H             | 10             |
| 1471 | JQ703273.1           | JQ703273.1; H27a; Asia_W_Europe; 14; T152C; A263G; C315CC     | 16569 | Asia_W_Europe | H27a       | H            | H             | 14             |
| 1472 | JQ703274.1           | JQ703274.1; H1a3; Asia_W_Europe; 14; A73G; A263G; C315CC      | 16567 | Asia_W_Europe | H1a3       | H            | H             | 14             |
| 1473 | JQ703275.1           | JQ703275.1; H7b2a; Asia_W_Europe; 15; A189G; C194T; A263G     | 16569 | Asia_W_Europe | H7b2a      | H            | H             | 15             |
| 1474 | JQ703276.1           | JQ703276.1; H5b2; Asia_W_Europe; 14; A263G; C309CCCT; T310C   | 16572 | Asia_W_Europe | H5b2       | H            | H             | 14             |
| 1475 | JQ703277.1           | JQ703277.1; H1+152; Asia_W_Europe; 14; T152C; A263G; C309CCT  | 16570 | Asia_W_Europe | H1+152     | H            | H             | 14             |
| 1476 | JQ703278.1           | JQ703278.1; H5q; Asia_W_Europe; 11; A263G; C315CC; C456T      | 16569 | Asia_W_Europe | H5q        | H            | H             | 11             |

**Supplementary Table S3** Human mitochondrial database (hMITO DB v1.0) metadata

| Row  | Name (accession no.) | Description                                                  | Size  | Geo_Region      | Haplogroup | Macro_ Haplo | Macro_ Haplo2 | Total Variants |
|------|----------------------|--------------------------------------------------------------|-------|-----------------|------------|--------------|---------------|----------------|
| 1477 | JQ703279.1           | JQ703279.1; H3; Asia_W_Europe; 11; A263G; C309CCT; T310C     | 16570 | Asia_W_Europe   | H3         | H            | H             | 11             |
| 1478 | JQ703280.1           | JQ703280.1; U5a2d; Asia_W_Europe_C; 31; A73G; A263G; C315CC  | 16569 | Asia_W_Europe_C | U5a2d      | U            | U5            | 31             |
| 1479 | JQ703281.1           | JQ703281.1; K1a10a; Asia_W; 32; A73G; T195C; A263G           | 16568 | Asia_W          | K1a10a     | K            | K             | 32             |
| 1480 | JQ703282.1           | JQ703282.1; H1as2; Asia_W_Europe; 13; A263G; C309CCT; T310C  | 16570 | Asia_W_Europe   | H1as2      | H            | H             | 13             |
| 1481 | JQ703283.1           | JQ703283.1; W5b; Asia_W; 42; C61T; G62T; T63C                | 16569 | Asia_W          | W5b        | W            | W             | 42             |
| 1482 | JQ703284.1           | JQ703284.1; H; Asia_W_Europe; 12; C151T; A263G; C309CCT      | 16570 | Asia_W_Europe   | H          | H            | H             | 12             |
| 1483 | JQ703285.1           | JQ703285.1; K1a15; Asia_W; 33; A73G; T195C; A263G            | 16573 | Asia_W          | K1a15      | K            | K             | 33             |
| 1484 | JQ703286.1           | JQ703286.1; H1ba; Asia_W_Europe; 11; A183G; A263G; C315CC    | 16569 | Asia_W_Europe   | H1ba       | H            | H             | 11             |
| 1485 | JQ703287.1           | JQ703287.1; H35; Asia_W_Europe; 16; T146C; A263G; C309CCCT   | 16571 | Asia_W_Europe   | H35        | H            | H             | 16             |
| 1486 | JQ703288.1           | JQ703288.1; H7d3a; Asia_W_Europe; 14; C150T; A263G; C309CCT  | 16570 | Asia_W_Europe   | H7d3a      | H            | H             | 14             |
| 1487 | JQ703289.1           | JQ703289.1; H3v1; Asia_W_Europe; 14; A263G; C315CC; T408A    | 16569 | Asia_W_Europe   | H3v1       | H            | H             | 14             |
| 1488 | JQ703290.1           | JQ703290.1; H2a2; Asia_W_Europe; 5; A263G; C309CCT; T310C    | 16570 | Asia_W_Europe   | H2a2       | H            | H             | 5              |
| 1489 | JQ703291.1           | JQ703291.1; H3b3; Asia_W_Europe; 15; A263G; C309CCCT; T310C  | 16571 | Asia_W_Europe   | H3b3       | H            | H             | 15             |
| 1490 | JQ703292.1           | JQ703292.1; K1c1d; Asia_W; 37; A73G; T146C; T152C            | 16566 | Asia_W          | K1c1d      | K            | K             | 37             |
| 1491 | JQ703293.1           | JQ703293.1; T2b1; Asia_W; 39; A73G; T195C; A263G             | 16571 | Asia_W          | T2b1       | T            | T             | 39             |
| 1492 | JQ703294.1           | JQ703294.1; T2b7a1; Asia_W; 39; A73G; T152C; A263G           | 16568 | Asia_W          | T2b7a1     | T            | T             | 39             |
| 1493 | JQ703295.1           | JQ703295.1; H20a2; Asia_W_Europe; 12; A263G; C315CC; A750G   | 16569 | Asia_W_Europe   | H20a2      | H            | H             | 12             |
| 1494 | JQ703296.1           | JQ703296.1; K1a4; Asia_W; 34; A73G; A263G; C309CCT           | 16572 | Asia_W          | K1a4       | K            | K             | 34             |
| 1495 | JQ703297.1           | JQ703297.1; U5a1a1d; Asia_W_Europe_C; 31; A73G; G185A; T204C | 16569 | Asia_W_Europe_C | U5a1a1d    | U            | U5            | 31             |
| 1496 | JQ703298.1           | JQ703298.1; H3z1; Asia_W_Europe; 16; A263G; T293C; C315CC    | 16569 | Asia_W_Europe   | H3z1       | H            | H             | 16             |
| 1497 | JQ703299.1           | JQ703299.1; H8c1; Asia_W_Europe; 21; C114T; T146C; T152C     | 16570 | Asia_W_Europe   | H8c1       | H            | H             | 21             |
| 1498 | JQ703300.1           | JQ703300.1; K2a6; Asia_W; 34; A73G; T146C; T152C             | 16569 | Asia_W          | K2a6       | K            | K             | 34             |
| 1499 | JQ703301.1           | JQ703301.1; H3ac; Asia_W_Europe; 10; A263G; C315CC; A750G    | 16569 | Asia_W_Europe   | H3ac       | H            | H             | 10             |
| 1500 | JQ703302.1           | JQ703302.1; H5a1a; Asia_W_Europe; 15; A93G; A263G; C315CC    | 16567 | Asia_W_Europe   | H5a1a      | H            | H             | 15             |
| 1501 | JQ703303.1           | JQ703303.1; H91; Asia_W_Europe; 11; T195C; A263G; C315CC     | 16569 | Asia_W_Europe   | H91        | H            | H             | 11             |
| 1502 | JQ703304.1           | JQ703304.1; H3an; Asia_W_Europe; 12; G251A; A263G; C315CC    | 16569 | Asia_W_Europe   | H3an       | H            | H             | 12             |
| 1503 | JQ703305.1           | JQ703305.1; H1+152; Asia_W_Europe; 10; T152C; A263G; C315CC  | 16569 | Asia_W_Europe   | H1+152     | H            | H             | 10             |
| 1504 | JQ703306.1           | JQ703306.1; H62; Asia_W_Europe; 12; T152C; A263G; C315CC     | 16569 | Asia_W_Europe   | H62        | H            | H             | 12             |
| 1505 | JQ703307.1           | JQ703307.1; H5; Asia_W_Europe; 14; A263G; C315CC; C456T      | 16569 | Asia_W_Europe   | H5         | H            | H             | 14             |
| 1506 | JQ703308.1           | JQ703308.1; K1a1b1a; Asia_W; 37; A73G; C114T; A263G          | 16570 | Asia_W          | K1a1b1a    | K            | K             | 37             |
| 1507 | JQ703309.1           | JQ703309.1; K1a2; Asia_W; 37; A73G; A263G; C309CCT           | 16570 | Asia_W          | K1a2       | K            | K             | 37             |
| 1508 | JQ703310.1           | JQ703310.1; H83; Asia_W_Europe; 11; A263G; C315CC; A750G     | 16569 | Asia_W_Europe   | H83        | H            | H             | 11             |
| 1509 | JQ703311.1           | JQ703311.1; H1u1; Asia_W_Europe; 11; A263G; A750G; A1438G    | 16568 | Asia_W_Europe   | H1u1       | H            | H             | 11             |
| 1510 | JQ703312.1           | JQ703312.1; H1n5; Asia_W_Europe; 13; T146C; T195C; A263G     | 16569 | Asia_W_Europe   | H1n5       | H            | H             | 13             |
| 1511 | JQ703313.1           | JQ703313.1; H7; Asia_W_Europe; 14; T152C; A263G; C309CCT     | 16572 | Asia_W_Europe   | H7         | H            | H             | 14             |
| 1512 | JQ703314.1           | JQ703314.1; H6a1b4; Asia_W_Europe; 16; T239C; A263G; C315CC  | 16569 | Asia_W_Europe   | H6a1b4     | H            | H             | 16             |
| 1513 | JQ703315.1           | JQ703315.1; H1a1; Asia_W_Europe; 14; A73G; A263G; C315CC     | 16569 | Asia_W_Europe   | H1a1       | H            | H             | 14             |
| 1514 | JQ703316.1           | JQ703316.1; H1ag1; Asia_W_Europe; 12; A263G; C315CC; CA522d  | 16567 | Asia_W_Europe   | H1ag1      | H            | H             | 12             |
| 1515 | JQ703317.1           | JQ703317.1; H1bn; Asia_W_Europe; 14; A263G; C309CCT; T310C   | 16570 | Asia_W_Europe   | H1bn       | H            | H             | 14             |
| 1516 | JQ703318.1           | JQ703318.1; K2a5; Asia_W; 34; A73G; T146C; T152C             | 16570 | Asia_W          | K2a5       | K            | K             | 34             |
| 1517 | JQ703319.1           | JQ703319.1; H1n1a; Asia_W_Europe; 18; T146C; A263G; C309CCT  | 16570 | Asia_W_Europe   | H1n1a      | H            | H             | 18             |

**Supplementary Table S3** Human mitochondrial database (hMITO DB v1.0) metadata

| Row  | Name (accession no.) | Description                                                     | Size  | Geo_Region        | Haplogroup | Macro_Haplo | Macro_Haplo2 | Total Variants |
|------|----------------------|-----------------------------------------------------------------|-------|-------------------|------------|-------------|--------------|----------------|
| 1518 | JQ703320.1           | JQ703320.1; H10e; Asia_W_Europe; 14; A263G; C309CCT; T310C      | 16570 | Asia_W_Europe     | H10e       | H           | H            | 14             |
| 1519 | JQ703321.1           | JQ703321.1; H6a1b4; Asia_W_Europe; 15; T239C; A263G; C315CC     | 16569 | Asia_W_Europe     | H6a1b4     | H           | H            | 15             |
| 1520 | JQ703322.1           | JQ703322.1; H1f+16093; Asia_W_Europe; 14; A263G; C315CC; A750G  | 16569 | Asia_W_Europe     | H1f+16093  | H           | H            | 14             |
| 1521 | JQ703323.1           | JQ703323.1; K1a12; Asia_W; 34; A73G; T195C; A263G               | 16573 | Asia_W            | K1a12      | K           | K            | 34             |
| 1522 | JQ703324.1           | JQ703324.1; H1ak; Asia_W_Europe; 13; T195C; A263G; C309CCT      | 16570 | Asia_W_Europe     | H1ak       | H           | H            | 13             |
| 1523 | JQ703325.1           | JQ703325.1; H39b; Asia_W_Europe; 11; A263G; C309CCT; T310C      | 16570 | Asia_W_Europe     | H39b       | H           | H            | 11             |
| 1524 | JQ703326.1           | JQ703326.1; H5; Asia_W_Europe; 12; A263G; C309CCT; T310C        | 16570 | Asia_W_Europe     | H5         | H           | H            | 12             |
| 1525 | JQ703327.1           | JQ703327.1; H50; Asia_W_Europe; 10; A263G; C309CCT; T310C       | 16570 | Asia_W_Europe     | H50        | H           | H            | 10             |
| 1526 | JQ703328.1           | JQ703328.1; H2a2a1; Asia_W_Europe; 5; C309CCT; T310C; C12858T   | 16570 | Asia_W_Europe     | H2a2a1     | H           | H            | 5              |
| 1527 | JQ703329.1           | JQ703329.1; H17b; Asia_W_Europe; 10; A263G; A750G; A1438G       | 16568 | Asia_W_Europe     | H17b       | H           | H            | 10             |
| 1528 | JQ703330.1           | JQ703330.1; J2a1a1a2; Asia_W; 41; A73G; C150T; T152C            | 16568 | Asia_W            | J2a1a1a2   | J           | J            | 41             |
| 1529 | JQ703331.1           | JQ703331.1; U5a1b3; Asia_W_Europe_C; 27; A73G; A263G; C315CC    | 16569 | Asia_W_Europe_C   | U5a1b3     | U           | U5           | 27             |
| 1530 | JQ703332.1           | JQ703332.1; A2+(64); Asia_NE_America_N; 40; C64T; A73G; T146C   | 16568 | Asia_NE_America_N | A2+(64)    | A           | A            | 40             |
| 1531 | JQ703333.1           | JQ703333.1; H1; Asia_W_Europe; 12; A263G; C309CCT; T310C        | 16570 | Asia_W_Europe     | H1         | H           | H            | 12             |
| 1532 | JQ703334.1           | JQ703334.1; H33a; Asia_W_Europe; 10; A263G; A750G; A1374T       | 16568 | Asia_W_Europe     | H33a       | H           | H            | 10             |
| 1533 | JQ703335.1           | JQ703335.1; U5a2a1+152; Asia_W_Europe_C; 30; A73G; T152C; A263G | 16570 | Asia_W_Europe_C   | U5a2a1+152 | U           | U5           | 30             |
| 1534 | JQ703336.1           | JQ703336.1; H1; Asia_W_Europe; 12; A263G; C309CCT; T310C        | 16570 | Asia_W_Europe     | H1         | H           | H            | 12             |
| 1535 | JQ703337.1           | JQ703337.1; H1b; Asia_W_Europe; 13; A263G; C315CC; A750G        | 16569 | Asia_W_Europe     | H1b        | H           | H            | 13             |
| 1536 | JQ703338.1           | JQ703338.1; H31; Asia_W_Europe; 13; T146C; T195C; A263G         | 16569 | Asia_W_Europe     | H31        | H           | H            | 13             |
| 1537 | JQ703339.1           | JQ703339.1; H4a1a+195; Asia_W_Europe; 22; T195C; A263G; C309CCT | 16568 | Asia_W_Europe     | H4a1a+195  | H           | H            | 22             |
| 1538 | JQ703340.1           | JQ703340.1; H3n; Asia_W_Europe; 15; T146C; A263G; C315CC        | 16569 | Asia_W_Europe     | H3n        | H           | H            | 15             |
| 1539 | JQ703341.1           | JQ703341.1; H; Asia_W_Europe; 14; A263G; C309CCT; T310C         | 16570 | Asia_W_Europe     | H          | H           | H            | 14             |
| 1540 | JQ703342.1           | JQ703342.1; H1c14; Asia_W_Europe; 16; A263G; C309CCCT; T310C    | 16571 | Asia_W_Europe     | H1c14      | H           | H            | 16             |
| 1541 | JQ703343.1           | JQ703343.1; H11b1; Asia_W_Europe; 18; T152C; T195C; A263G       | 16570 | Asia_W_Europe     | H11b1      | H           | H            | 18             |
| 1542 | JQ703344.1           | JQ703344.1; H2a1; Asia_W_Europe; 9; A263G; C315CC; A750G        | 16569 | Asia_W_Europe     | H2a1       | H           | H            | 9              |
| 1543 | JQ703345.1           | JQ703345.1; H6a1a2b1; Asia_W_Europe; 19; T239C; A263G; C309CCT  | 16570 | Asia_W_Europe     | H6a1a2b1   | H           | H            | 19             |
| 1544 | JQ703346.1           | JQ703346.1; H1bq; Asia_W_Europe; 16; A263G; C309CCCT; T310C     | 16571 | Asia_W_Europe     | H1bq       | H           | H            | 16             |
| 1545 | JQ703347.1           | JQ703347.1; K1a3; Asia_W; 34; A73G; C151T; T152C                | 16570 | Asia_W            | K1a3       | K           | K            | 34             |
| 1546 | JQ703348.1           | JQ703348.1; H3q; Asia_W_Europe; 16; A263G; C315CC; C356CC       | 16570 | Asia_W_Europe     | H3q        | H           | H            | 16             |
| 1547 | JQ703349.1           | JQ703349.1; H52; Asia_W_Europe; 11; T152C; A263G; C309CCT       | 16570 | Asia_W_Europe     | H52        | H           | H            | 11             |
| 1548 | JQ703350.1           | JQ703350.1; H56b; Asia_W_Europe; 13; A263G; C309CCT; T310C      | 16570 | Asia_W_Europe     | H56b       | H           | H            | 13             |
| 1549 | JQ703351.1           | JQ703351.1; H1; Asia_W_Europe; 14; C150T; A263G; C309CCCT       | 16569 | Asia_W_Europe     | H1         | H           | H            | 14             |
| 1550 | JQ703352.1           | JQ703352.1; H24a1; Asia_W_Europe; 13; A263G; C315CCC; A750G     | 16570 | Asia_W_Europe     | H24a1      | H           | H            | 13             |
| 1551 | JQ703353.1           | JQ703353.1; H6b1; Asia_W_Europe; 18; C44CC; T146C; T152C        | 16571 | Asia_W_Europe     | H6b1       | H           | H            | 18             |
| 1552 | JQ703354.1           | JQ703354.1; H7; Asia_W_Europe; 12; A263G; C315CC; A750G         | 16569 | Asia_W_Europe     | H7         | H           | H            | 12             |
| 1553 | JQ703355.1           | JQ703355.1; H2a5; Asia_W_Europe; 12; A263G; C309CCCT; T310C     | 16571 | Asia_W_Europe     | H2a5       | H           | H            | 12             |
| 1554 | JQ703356.1           | JQ703356.1; U2e1; Asia_S_W_Europe; 39; A73G; T152C; T217C       | 16573 | Asia_S_W_Europe   | U2e1       | U           | U2           | 39             |
| 1555 | JQ703357.1           | JQ703357.1; H1b1g; Asia_W_Europe; 18; C64T; T195C; A263G        | 16569 | Asia_W_Europe     | H1b1g      | H           | H            | 18             |
| 1556 | JQ703358.1           | JQ703358.1; H24a; Asia_W_Europe; 12; T152C; A263G; C315CC       | 16569 | Asia_W_Europe     | H24a       | H           | H            | 12             |
| 1557 | JQ703359.1           | JQ703359.1; H7b; Asia_W_Europe; 13; A263G; C309CCCT; T310C      | 16571 | Asia_W_Europe     | H7b        | H           | H            | 13             |
| 1558 | JQ703360.1           | JQ703360.1; H+152; Asia_W_Europe; 13; T152C; A263G; C315CC      | 16567 | Asia_W_Europe     | H+152      | H           | H            | 13             |

**Supplementary Table S3** Human mitochondrial database (hMITO DB v1.0) metadata

| Row  | Name (accession no.) | Description                                                      | Size  | Geo_Region      | Haplogroup | Macro_Haplo | Macro_Haplo2 | Total Variants |
|------|----------------------|------------------------------------------------------------------|-------|-----------------|------------|-------------|--------------|----------------|
| 1559 | JQ703361.1           | JQ703361.1; K1a4h; Asia_W; 36; A73G; A263G; C309CCT              | 16570 | Asia_W          | K1a4h      | K           | K            | 36             |
| 1560 | JQ703362.1           | JQ703362.1; H2a1b1; Asia_W_Europe; 13; A210G; A263G; C309CCCT    | 16571 | Asia_W_Europe   | H2a1b1     | H           | H            | 13             |
| 1561 | JQ703363.1           | JQ703363.1; HV6; Asia_W; 13; A263G; C309CCCT; T310C              | 16571 | Asia_W          | HV6        | HV          | HV           | 13             |
| 1562 | JQ703364.1           | JQ703364.1; H1b1+16362; Asia_W_Europe; 16; A263G; C315CC; CA522d | 16567 | Asia_W_Europe   | H1b1+16362 | H           | H            | 16             |
| 1563 | JQ703365.1           | JQ703365.1; K1a16; Asia_W; 32; A73G; T195C; A263G                | 16571 | Asia_W          | K1a16      | K           | K            | 32             |
| 1564 | JQ703366.1           | JQ703366.1; H2a1e1a; Asia_W_Europe; 12; A263G; C309CCT; T310C    | 16570 | Asia_W_Europe   | H2a1e1a    | H           | H            | 12             |
| 1565 | JQ703367.1           | JQ703367.1; HV9; Asia_W; 12; A263G; C309CCCT; T310C              | 16571 | Asia_W          | HV9        | HV          | HV           | 12             |
| 1566 | JQ703368.1           | JQ703368.1; H4a1a1; Asia_W_Europe; 16; A263G; C315CC; A750G      | 16569 | Asia_W_Europe   | H4a1a1     | H           | H            | 16             |
| 1567 | JQ703369.1           | JQ703369.1; H51a; Asia_W_Europe; 12; A263G; C309CCT; T310C       | 16570 | Asia_W_Europe   | H51a       | H           | H            | 12             |
| 1568 | JQ703370.1           | JQ703370.1; HV+16311; Asia_W_Europe; 16; A263G; C309CCT; T310C   | 16571 | Asia_W_Europe   | HV+16311   | H           | H            | 16             |
| 1569 | JQ703371.1           | JQ703371.1; H1aq1; Asia_W_Europe; 13; A263G; C315CC; CA522d      | 16567 | Asia_W_Europe   | H1aq1      | H           | H            | 13             |
| 1570 | JQ703372.1           | JQ703372.1; H7b; Asia_W_Europe; 10; A263G; C315CC; A750G         | 16569 | Asia_W_Europe   | H7b        | H           | H            | 10             |
| 1571 | JQ703373.1           | JQ703373.1; H13a1a1a; Asia_W_Europe; 18; T152C; A263G; C309CCT   | 16570 | Asia_W_Europe   | H13a1a1a   | H           | H            | 18             |
| 1572 | JQ703374.1           | JQ703374.1; H5a(H5a1i); Asia_W_Europe; 2; C315CC; G16153A;       | 16569 | Asia_W_Europe   | H5a(H5a1i) | H           | H            | 2              |
| 1573 | JQ703375.1           | JQ703375.1; K2b1a1a; Asia_W; 37; A73G; T146C; T152C              | 16569 | Asia_W          | K2b1a1a    | K           | K            | 37             |
| 1574 | JQ703376.1           | JQ703376.1; V; Europe_S; 15; T72C; A263G; C309CCT                | 16570 | Europe_S        | V          | V           | V            | 15             |
| 1575 | JQ703377.1           | JQ703377.1; H7d1; Asia_W_Europe; 13; A263G; C315CC; A750G        | 16569 | Asia_W_Europe   | H7d1       | H           | H            | 13             |
| 1576 | JQ703378.1           | JQ703378.1; K1b2a; Asia_W; 35; A73G; T146C; T195C                | 16573 | Asia_W          | K1b2a      | K           | K            | 35             |
| 1577 | JQ703379.1           | JQ703379.1; K1a15; Asia_W; 32; A73G; T195C; A263G                | 16571 | Asia_W          | K1a15      | K           | K            | 32             |
| 1578 | JQ703380.1           | JQ703380.1; H1ba; Asia_W_Europe; 11; A263G; C315CC; A750G        | 16569 | Asia_W_Europe   | H1ba       | H           | H            | 11             |
| 1579 | JQ703381.1           | JQ703381.1; H3n; Asia_W_Europe; 16; A263G; C309CCT; T310C        | 16570 | Asia_W_Europe   | H3n        | H           | H            | 16             |
| 1580 | JQ703382.1           | JQ703382.1; H3b1b1; Asia_W_Europe; 18; A153G; A263G; C309CCT     | 16568 | Asia_W_Europe   | H3b1b1     | H           | H            | 18             |
| 1581 | JQ703383.1           | JQ703383.1; H1c20; Asia_W_Europe; 14; A263G; C309CCCT; T310C     | 16571 | Asia_W_Europe   | H1c20      | H           | H            | 14             |
| 1582 | JQ703384.1           | JQ703384.1; H1a; Asia_W_Europe; 13; A73G; G143A; A263G           | 16569 | Asia_W_Europe   | H1a        | H           | H            | 13             |
| 1583 | JQ703385.1           | JQ703385.1; U4a2b; Asia_N_Europe_N; 30; A73G; T195C; A263G       | 16570 | Asia_N_Europe_N | U4a2b      | U           | U4           | 30             |
| 1584 | JQ703386.1           | JQ703386.1; H13a1a1b; Asia_W_Europe; 16; A263G; C309CCT; T310C   | 16570 | Asia_W_Europe   | H13a1a1b   | H           | H            | 16             |
| 1585 | JQ703387.1           | JQ703387.1; H3v+16093; Asia_W_Europe; 14; A263G; C309CCCT; T310C | 16571 | Asia_W_Europe   | H3v+16093  | H           | H            | 14             |
| 1586 | JQ703388.1           | JQ703388.1; H1cf; Asia_W_Europe; 12; A263G; C315CC; A750G        | 16569 | Asia_W_Europe   | H1cf       | H           | H            | 12             |
| 1587 | JQ703389.1           | JQ703389.1; H5s; Asia_W_Europe; 14; A73G; A263G; C309CCT         | 16570 | Asia_W_Europe   | H5s        | H           | H            | 14             |
| 1588 | JQ703390.1           | JQ703390.1; H1+16239; Asia_W_Europe; 13; A263G; C309CCT; T310C   | 16570 | Asia_W_Europe   | H1+16239   | H           | H            | 13             |
| 1589 | JQ703391.1           | JQ703391.1; H6a1b2b; Asia_W_Europe; 17; T239C; A263G; C309CCT    | 16570 | Asia_W_Europe   | H6a1b2b    | H           | H            | 17             |
| 1590 | JQ703392.1           | JQ703392.1; H3; Asia_W_Europe; 13; A263G; C315CC; A503G          | 16569 | Asia_W_Europe   | H3         | H           | H            | 13             |
| 1591 | JQ703393.1           | JQ703393.1; H3ao; Asia_W_Europe; 13; A263G; C315CC; A750G        | 16569 | Asia_W_Europe   | H3ao       | H           | H            | 13             |
| 1592 | JQ703394.1           | JQ703394.1; H5; Asia_W_Europe; 14; C150T; T204C; A263G           | 16571 | Asia_W_Europe   | H5         | H           | H            | 14             |
| 1593 | JQ703395.1           | JQ703395.1; T1a1; Asia_W; 34; A73G; T152C; T195C                 | 16570 | Asia_W          | T1a1       | T           | T            | 34             |
| 1594 | JQ703396.1           | JQ703396.1; H24a1; Asia_W_Europe; 13; A263G; C315CCC; A750G      | 16570 | Asia_W_Europe   | H24a1      | H           | H            | 13             |
| 1595 | JQ703397.1           | JQ703397.1; H2a1a1; Asia_W_Europe; 13; A263G; C315CC; A750G      | 16569 | Asia_W_Europe   | H2a1a1     | H           | H            | 13             |
| 1596 | JQ703398.1           | JQ703398.1; H4a1a3; Asia_W_Europe; 21; C150T; T195C; A263G       | 16568 | Asia_W_Europe   | H4a1a3     | H           | H            | 21             |
| 1597 | JQ703399.1           | JQ703399.1; H1; Asia_W_Europe; 12; T195C; A263G; T292C           | 16569 | Asia_W_Europe   | H1         | H           | H            | 12             |
| 1598 | JQ703400.1           | JQ703400.1; H1; Asia_W_Europe; 11; A263G; C315CC; A750G          | 16569 | Asia_W_Europe   | H1         | H           | H            | 11             |
| 1599 | JQ703401.1           | JQ703401.1; H4a1a4b1; Asia_W_Europe; 24; T195C; A263G; C315CC    | 16567 | Asia_W_Europe   | H4a1a4b1   | H           | H            | 24             |

**Supplementary Table S3** Human mitochondrial database (hMITO DB v1.0) metadata

| Row  | Name (accession no.) | Description                                                    | Size  | Geo_Region         | Haplogroup | Macro_Haplo | Macro_Haplo2 | Total Variants |
|------|----------------------|----------------------------------------------------------------|-------|--------------------|------------|-------------|--------------|----------------|
| 1600 | JQ703402.1           | JQ703402.1; J1c8a; Asia_W; 29; A73G; G185A; G228A              | 16571 | Asia_W             | J1c8a      | J           | J            | 29             |
| 1601 | JQ703403.1           | JQ703403.1; H1an1; Asia_W_Europe; 14; T152C; A263G; C315CC     | 16569 | Asia_W_Europe      | H1an1      | H           | H            | 14             |
| 1602 | JQ703404.1           | JQ703404.1; H6a1b2; Asia_W_Europe; 22; T146C; T152C; T239C     | 16570 | Asia_W_Europe      | H6a1b2     | H           | H            | 22             |
| 1603 | JQ703405.1           | JQ703405.1; H5h; Asia_W_Europe; 12; A263G; C315CC; C456T       | 16569 | Asia_W_Europe      | H5h        | H           | H            | 12             |
| 1604 | JQ703406.1           | JQ703406.1; W1e1a; Asia_W; 41; A73G; A189G; T195C              | 16571 | Asia_W             | W1e1a      | W           | W            | 41             |
| 1605 | JQ703407.1           | JQ703407.1; K1a4a1b; Asia_W; 37; A73G; T146C; A263G            | 16570 | Asia_W             | K1a4a1b    | K           | K            | 37             |
| 1606 | JQ703408.1           | JQ703408.1; H39; Asia_W_Europe; 10; A263G; C315CC; A750G       | 16569 | Asia_W_Europe      | H39        | H           | H            | 10             |
| 1607 | JQ703409.1           | JQ703409.1; D4a1c; Asia_E_America_N_S; 39; A73G; T152C; A263G  | 16570 | Asia_E_America_N_S | D4a1c      | D           | D            | 39             |
| 1608 | JQ703410.1           | JQ703410.1; H3c1; Asia_W_Europe; 15; A189G; A263G; C315CC      | 16569 | Asia_W_Europe      | H3c1       | H           | H            | 15             |
| 1609 | JQ703411.1           | JQ703411.1; H1+16189; Asia_W_Europe; 11; A263G; C315CC; A750G  | 16569 | Asia_W_Europe      | H1+16189   | H           | H            | 11             |
| 1610 | JQ703412.1           | JQ703412.1; K1b1b1; Asia_W; 43; A73G; T152C; A263G             | 16574 | Asia_W             | K1b1b1     | K           | K            | 43             |
| 1611 | JQ703413.1           | JQ703413.1; H2a2b1; Asia_W_Europe; 7; A263G; C309CCT; T310C    | 16570 | Asia_W_Europe      | H2a2b1     | H           | H            | 7              |
| 1612 | JQ703414.1           | JQ703414.1; H2a2b2; Asia_W_Europe; 8; A263G; C309CCT; T310C    | 16570 | Asia_W_Europe      | H2a2b2     | H           | H            | 8              |
| 1613 | JQ703415.1           | JQ703415.1; HV1b2; Asia_W; 22; T131C; T152C; A263G             | 16571 | Asia_W             | HV1b2      | HV          | HV           | 22             |
| 1614 | JQ703416.1           | JQ703416.1; H3b; Asia_W_Europe; 14; A263G; C309CCCT; T310C     | 16571 | Asia_W_Europe      | H3b        | H           | H            | 14             |
| 1615 | JQ703417.1           | JQ703417.1; H26a1a1; Asia_W_Europe; 15; T196C; A263G; C309CCT  | 16570 | Asia_W_Europe      | H26a1a1    | H           | H            | 15             |
| 1616 | JQ703418.1           | JQ703418.1; H1c1; Asia_W_Europe; 13; A263G; C315CC; T477C      | 16569 | Asia_W_Europe      | H1c1       | H           | H            | 13             |
| 1617 | JQ703419.1           | JQ703419.1; H1a3c1; Asia_W_Europe; 15; A73G; A263G; C315CC     | 16569 | Asia_W_Europe      | H1a3c1     | H           | H            | 15             |
| 1618 | JQ703420.1           | JQ703420.1; H1j; Asia_W_Europe; 13; A263G; C309CCCT; T310C     | 16571 | Asia_W_Europe      | H1j        | H           | H            | 13             |
| 1619 | JQ703421.1           | JQ703421.1; H13a1a1e; Asia_W_Europe; 18; T131C; A263G; C309CCT | 16568 | Asia_W_Europe      | H13a1a1e   | H           | H            | 18             |
| 1620 | JQ703422.1           | JQ703422.1; H7c1; Asia_W_Europe; 15; A263G; C309CCT; T310C     | 16570 | Asia_W_Europe      | H7c1       | H           | H            | 15             |
| 1621 | JQ703423.1           | JQ703423.1; H; Asia_W_Europe; 11; A263G; C309CCT; T310C        | 16570 | Asia_W_Europe      | H          | H           | H            | 11             |
| 1622 | JQ703424.1           | JQ703424.1; H1a1b; Asia_W_Europe; 14; A73G; A263G; C315CC      | 16569 | Asia_W_Europe      | H1a1b      | H           | H            | 14             |
| 1623 | JQ703425.1           | JQ703425.1; H3ap; Asia_W_Europe; 15; A263G; C309CCT; T310C     | 16570 | Asia_W_Europe      | H3ap       | H           | H            | 15             |
| 1624 | JQ703426.1           | JQ703426.1; H1; Asia_W_Europe; 11; A93G; A263G; C315CC         | 16569 | Asia_W_Europe      | H1         | H           | H            | 11             |
| 1625 | JQ703427.1           | JQ703427.1; K1a3a4; Asia_W; 34; A73G; A263G; C309CCT           | 16570 | Asia_W             | K1a3a4     | K           | K            | 34             |
| 1626 | JQ703428.1           | JQ703428.1; H1a3c; Asia_W_Europe; 14; A73G; A93G; A263G        | 16569 | Asia_W_Europe      | H1a3c      | H           | H            | 14             |
| 1627 | JQ703429.1           | JQ703429.1; H27; Asia_W_Europe; 13; A263G; C309CCT; T310C      | 16570 | Asia_W_Europe      | H27        | H           | H            | 13             |
| 1628 | JQ703430.1           | JQ703430.1; H1c7; Asia_W_Europe; 13; A263G; C309CCT; T310C     | 16570 | Asia_W_Europe      | H1c7       | H           | H            | 13             |
| 1629 | JQ703431.1           | JQ703431.1; V1a1; Europe_S; 19; T72C; A263G; C309CCT           | 16570 | Europe_S           | V1a1       | V           | V            | 19             |
| 1630 | JQ703432.1           | JQ703432.1; H6a1a2a; Asia_W_Europe; 20; C41T; T239C; A263G     | 16570 | Asia_W_Europe      | H6a1a2a    | H           | H            | 20             |
| 1631 | JQ703433.1           | JQ703433.1; H2a2a1; Asia_W_Europe; 4; T195C; C315CC; A9494G    | 16569 | Asia_W_Europe      | H2a2a1     | H           | H            | 4              |
| 1632 | JQ703434.1           | JQ703434.1; H3k; Asia_W_Europe; 13; T152C; T195C; A263G        | 16570 | Asia_W_Europe      | H3k        | H           | H            | 13             |
| 1633 | JQ703435.1           | JQ703435.1; H; Asia_W_Europe; 15; A263G; C309CCT; T310C        | 16570 | Asia_W_Europe      | H          | H           | H            | 15             |
| 1634 | JQ703436.1           | JQ703436.1; H24a; Asia_W_Europe; 12; A263G; C315CC; A750G      | 16569 | Asia_W_Europe      | H24a       | H           | H            | 12             |
| 1635 | JQ703437.1           | JQ703437.1; H7e; Asia_W_Europe; 13; A263G; C309CCT; T310C      | 16570 | Asia_W_Europe      | H7e        | H           | H            | 13             |
| 1636 | JQ703438.1           | JQ703438.1; H1e1a; Asia_W_Europe; 13; A263G; C315CC; A750G     | 16569 | Asia_W_Europe      | H1e1a      | H           | H            | 13             |
| 1637 | JQ703439.1           | JQ703439.1; H3j; Asia_W_Europe; 14; T152C; A263G; C315CC       | 16569 | Asia_W_Europe      | H3j        | H           | H            | 14             |
| 1638 | JQ703440.1           | JQ703440.1; H27; Asia_W_Europe; 13; A263G; C309CCT; T310C      | 16570 | Asia_W_Europe      | H27        | H           | H            | 13             |
| 1639 | JQ703441.1           | JQ703441.1; H1c1; Asia_W_Europe; 15; A263G; C309CCT; T310C     | 16570 | Asia_W_Europe      | H1c1       | H           | H            | 15             |
| 1640 | JQ703442.1           | JQ703442.1; H3g1; Asia_W_Europe; 15; T152C; A263G; C315CC      | 16569 | Asia_W_Europe      | H3g1       | H           | H            | 15             |



**Supplementary Table S3** Human mitochondrial database (hMITO DB v1.0) metadata

| Row  | Name (accession no.) | Description                                                     | Size  | Geo_Region    | Haplogroup  | Macro_ Haplo | Macro_ Haplo2 | Total Variants |
|------|----------------------|-----------------------------------------------------------------|-------|---------------|-------------|--------------|---------------|----------------|
| 1641 | JQ703443.1           | JQ703443.1; H1b1+16362; Asia_W_Europe; 17; A263G; C315CC; T482C | 16567 | Asia_W_Europe | H1b1+16362  | H            | H             | 17             |
| 1642 | JQ703444.1           | JQ703444.1; K1a4a1a+195; Asia_W; 37; A73G; T195C; A263G         | 16569 | Asia_W        | K1a4a1a+195 | K            | K             | 37             |
| 1643 | JQ703445.1           | JQ703445.1; M52a; Asia_S; 41; A73G; A263G; C315CC               | 16570 | Asia_S        | M52a        | M            | M52           | 41             |
| 1644 | JQ703446.1           | JQ703446.1; T1a1j; Asia_W; 42; A73G; T152C; T195C               | 16571 | Asia_W        | T1a1j       | T            | T             | 42             |
| 1645 | JQ703447.1           | JQ703447.1; H5a1; Asia_W_Europe; 16; A263G; C315CC; C456T       | 16567 | Asia_W_Europe | H5a1        | H            | H             | 16             |
| 1646 | JQ703448.1           | JQ703448.1; J1c5; Asia_W; 31; A73G; T152C; G185A                | 16569 | Asia_W        | J1c5        | J            | J             | 31             |
| 1647 | JQ703449.1           | JQ703449.1; H2a2a1; Asia_W_Europe; 4; C309CCT; T310C; G5252A    | 16570 | Asia_W_Europe | H2a2a1      | H            | H             | 4              |
| 1648 | JQ703450.1           | JQ703450.1; H1a; Asia_W_Europe; 13; A73G; A263G; C309CCT        | 16570 | Asia_W_Europe | H1a         | H            | H             | 13             |
| 1649 | JQ703451.1           | JQ703451.1; H11a2a1; Asia_W_Europe; 19; T195C; A263G; C309CCCT  | 16571 | Asia_W_Europe | H11a2a1     | H            | H             | 19             |
| 1650 | JQ703452.1           | JQ703452.1; H10e2; Asia_W_Europe; 13; A263G; C309CCT; T310C     | 16570 | Asia_W_Europe | H10e2       | H            | H             | 13             |
| 1651 | JQ703453.1           | JQ703453.1; H11a1; Asia_W_Europe; 18; T195C; A263G; C315CC      | 16569 | Asia_W_Europe | H11a1       | H            | H             | 18             |
| 1652 | JQ703454.1           | JQ703454.1; H89; Asia_W_Europe; 15; A263G; C309CCT; T310C       | 16570 | Asia_W_Europe | H89         | H            | H             | 15             |
| 1653 | JQ703455.1           | JQ703455.1; H66a1; Asia_W_Europe; 11; A263G; C315CC; A750G      | 16569 | Asia_W_Europe | H66a1       | H            | H             | 11             |
| 1654 | JQ703456.1           | JQ703456.1; H7c6; Asia_W_Europe; 16; T146C; T152C; A263G        | 16570 | Asia_W_Europe | H7c6        | H            | H             | 16             |
| 1655 | JQ703457.1           | JQ703457.1; H1b; Asia_W_Europe; 15; A263G; C309CCT; T310C       | 16570 | Asia_W_Europe | H1b         | H            | H             | 15             |
| 1656 | JQ703458.1           | JQ703458.1; T2b23; Asia_W; 37; A73G; A263G; C309CCCT            | 16571 | Asia_W        | T2b23       | T            | T             | 37             |
| 1657 | JQ703459.1           | JQ703459.1; H1c9a; Asia_W_Europe; 16; T152C; A263G; C309CCCT    | 16571 | Asia_W_Europe | H1c9a       | H            | H             | 16             |
| 1658 | JQ703460.1           | JQ703460.1; H49a; Asia_W_Europe; 13; A263G; C309CCT; T310C      | 16572 | Asia_W_Europe | H49a        | H            | H             | 13             |
| 1659 | JQ703461.1           | JQ703461.1; J1c2; Asia_W; 31; A73G; G185A; A188G                | 16569 | Asia_W        | J1c2        | J            | J             | 31             |
| 1660 | JQ703462.1           | JQ703462.1; H3ag; Asia_W_Europe; 11; A263G; C315CC; A750G       | 16569 | Asia_W_Europe | H3ag        | H            | H             | 11             |
| 1661 | JQ703463.1           | JQ703463.1; K1a; Asia_W; 36; A73G; T146C; A263G                 | 16571 | Asia_W        | K1a         | K            | K             | 36             |
| 1662 | JQ703464.1           | JQ703464.1; J1c1c; Asia_W; 36; A73G; C150T; G185A               | 16567 | Asia_W        | J1c1c       | J            | J             | 36             |
| 1663 | JQ703465.1           | JQ703465.1; H1v; Asia_W_Europe; 11; A263G; C315CC; A745G        | 16569 | Asia_W_Europe | H1v         | H            | H             | 11             |
| 1664 | JQ703466.1           | JQ703466.1; H1; Asia_W_Europe; 11; A263G; C309CCT; T310C        | 16570 | Asia_W_Europe | H1          | H            | H             | 11             |
| 1665 | JQ703467.1           | JQ703467.1; H3b+16129; Asia_W_Europe; 14; A263G; C309CCT; T310C | 16570 | Asia_W_Europe | H3b+16129   | H            | H             | 14             |
| 1666 | JQ703468.1           | JQ703468.1; H5a1+16093; Asia_W_Europe; 14; A263G; C315CC; C456T | 16567 | Asia_W_Europe | H5a1+16093  | H            | H             | 14             |
| 1667 | JQ703469.1           | JQ703469.1; J1c3a2; Asia_W; 33; A73G; G228A; A263G              | 16570 | Asia_W        | J1c3a2      | J            | J             | 33             |
| 1668 | JQ703470.1           | JQ703470.1; H3a; Asia_W_Europe; 14; T152C; A263G; C309CCCT      | 16571 | Asia_W_Europe | H3a         | H            | H             | 14             |
| 1669 | JQ703471.1           | JQ703471.1; H2a2a1d; Asia_W_Europe; 4; C315CC; C12135A; A14357G | 16569 | Asia_W_Europe | H2a2a1d     | H            | H             | 4              |
| 1670 | JQ703472.1           | JQ703472.1; H1a1; Asia_W_Europe; 13; A73G; A263G; C315CC        | 16569 | Asia_W_Europe | H1a1        | H            | H             | 13             |
| 1671 | JQ703473.1           | JQ703473.1; H1ad; Asia_W_Europe; 14; A263G; C309CCCT; T310C     | 16569 | Asia_W_Europe | H1ad        | H            | H             | 14             |
| 1672 | JQ703474.1           | JQ703474.1; H31a; Asia_W_Europe; 16; T72G; T146C; T195C         | 16570 | Asia_W_Europe | H31a        | H            | H             | 16             |
| 1673 | JQ703475.1           | JQ703475.1; HV1b2; Asia_W; 21; T152C; A263G; C309CCCT           | 16571 | Asia_W        | HV1b2       | HV           | HV            | 21             |
| 1674 | JQ703476.1           | JQ703476.1; H1g1; Asia_W_Europe; 13; A263G; C315CC; A750G       | 16569 | Asia_W_Europe | H1g1        | H            | H             | 13             |
| 1675 | JQ703477.1           | JQ703477.1; H1bc; Asia_W_Europe; 15; T152C; A263G; C309CCT      | 16572 | Asia_W_Europe | H1bc        | H            | H             | 15             |
| 1676 | JQ703478.1           | JQ703478.1; H56; Asia_W_Europe; 10; A263G; C309CCT; T310C       | 16570 | Asia_W_Europe | H56         | H            | H             | 10             |
| 1677 | JQ703479.1           | JQ703479.1; H7g; Asia_W_Europe; 11; A263G; C309CCT; T310C       | 16570 | Asia_W_Europe | H7g         | H            | H             | 11             |
| 1678 | JQ703480.1           | JQ703480.1; H26a1; Asia_W_Europe; 14; T152C; A263G; C315CC      | 16569 | Asia_W_Europe | H26a1       | H            | H             | 14             |
| 1679 | JQ703481.1           | JQ703481.1; L0a1a2; Africa_S_SE; 83; C64T; A93G; G185A          | 16567 | Africa_S_SE   | L0a1a2      | L0           | L0            | 83             |
| 1680 | JQ703482.1           | JQ703482.1; H75; Asia_W_Europe; 12; T152C; A263G; C309CCT       | 16570 | Asia_W_Europe | H75         | H            | H             | 12             |
| 1681 | JQ703483.1           | JQ703483.1; H10e2; Asia_W_Europe; 15; A263G; C309CCT; T310C     | 16570 | Asia_W_Europe | H10e2       | H            | H             | 15             |

**Supplementary Table S3** Human mitochondrial database (hMITO DB v1.0) metadata

| Row  | Name (accession no.) | Description                                                    | Size  | Geo_Region            | Haplogroup | Macro_Haplo | Macro_Haplo2 | Total Variants |
|------|----------------------|----------------------------------------------------------------|-------|-----------------------|------------|-------------|--------------|----------------|
| 1682 | JQ703484.1           | JQ703484.1; H1; Asia_W_Europe; 12; A263G; C309CCT; T310C       | 16570 | Asia_W_Europe         | H1         | H           | H            | 12             |
| 1683 | JQ703485.1           | JQ703485.1; K1a1b1a; Asia_W; 37; A73G; A263G; C315CC           | 16569 | Asia_W                | K1a1b1a    | K           | K            | 37             |
| 1684 | JQ703486.1           | JQ703486.1; K1a+195; Asia_W; 34; A73G; T195C; A263G            | 16569 | Asia_W                | K1a+195    | K           | K            | 34             |
| 1685 | JQ703487.1           | JQ703487.1; K1c1b; Asia_W; 36; A73G; T146C; T152C              | 16568 | Asia_W                | K1c1b      | K           | K            | 36             |
| 1686 | JQ703488.1           | JQ703488.1; U2e1d; Asia_S_W_Europe; 41; A73G; T152C; T217C     | 16573 | Asia_S_W_Europe       | U2e1d      | U           | U2           | 41             |
| 1687 | JQ703489.1           | JQ703489.1; H1c; Asia_W_Europe; 11; A263G; C315CC; T477C       | 16570 | Asia_W_Europe         | H1c        | H           | H            | 11             |
| 1688 | JQ703490.1           | JQ703490.1; V; Europe_S; 15; T72C; A263G; C309CCT              | 16570 | Europe_S              | V          | V           | V            | 15             |
| 1689 | JQ703491.1           | JQ703491.1; U2e1g; Asia_S_W_Europe; 39; A73G; T152C; T217C     | 16571 | Asia_S_W_Europe       | U2e1g      | U           | U2           | 39             |
| 1690 | JQ703492.1           | JQ703492.1; H3g; Asia_W_Europe; 12; T152C; A263G; C315CC       | 16569 | Asia_W_Europe         | H3g        | H           | H            | 12             |
| 1691 | JQ703493.1           | JQ703493.1; K1a4a1; Asia_W; 40; A73G; T146C; A257G             | 16569 | Asia_W                | K1a4a1     | K           | K            | 40             |
| 1692 | JQ703494.1           | JQ703494.1; H5a5; Asia_W_Europe; 14; T146C; A263G; C309CCCT    | 16571 | Asia_W_Europe         | H5a5       | H           | H            | 14             |
| 1693 | JQ703495.1           | JQ703495.1; H7h; Asia_W_Europe; 13; T146C; A263G; C299A        | 16569 | Asia_W_Europe         | H7h        | H           | H            | 13             |
| 1694 | JQ703496.1           | JQ703496.1; H1c3; Asia_W_Europe; 14; A257G; A263G; C309CCT     | 16570 | Asia_W_Europe         | H1c3       | H           | H            | 14             |
| 1695 | JQ703497.1           | JQ703497.1; W6b; Asia_W; 44; A73G; A189G; C194T                | 16572 | Asia_W                | W6b        | W           | W            | 44             |
| 1696 | JQ703498.1           | JQ703498.1; H5d; Asia_W_Europe; 13; A263G; C309CCCT; T310C     | 16571 | Asia_W_Europe         | H5d        | H           | H            | 13             |
| 1697 | JQ703499.1           | JQ703499.1; H1c4b; Asia_W_Europe; 16; A263G; C315CC; T477C     | 16567 | Asia_W_Europe         | H1c4b      | H           | H            | 16             |
| 1698 | JQ703500.1           | JQ703500.1; H1b1h; Asia_W_Europe; 17; A263G; C309CCCT; T310C   | 16569 | Asia_W_Europe         | H1b1h      | H           | H            | 17             |
| 1699 | JQ703501.1           | JQ703501.1; T2b4; Asia_W; 34; A73G; A263G; C309CCCT            | 16571 | Asia_W                | T2b4       | T           | T            | 34             |
| 1700 | JQ703502.1           | JQ703502.1; H49a; Asia_W_Europe; 13; A263G; C309CCT; T310C     | 16573 | Asia_W_Europe         | H49a       | H           | H            | 13             |
| 1701 | JQ703503.1           | JQ703503.1; H31; Asia_W_Europe; 15; T146C; T195C; A263G        | 16570 | Asia_W_Europe         | H31        | H           | H            | 15             |
| 1702 | JQ703504.1           | JQ703504.1; H10d; Asia_W_Europe; 13; A263G; C309CCT; T310C     | 16570 | Asia_W_Europe         | H10d       | H           | H            | 13             |
| 1703 | JQ703505.1           | JQ703505.1; R0a2m; Africa_NE_Asia_W; 22; T57TC; C64T; A263G    | 16572 | Africa_NE_Asia_W      | R0a2m      | R           | R0           | 22             |
| 1704 | JQ703506.1           | JQ703506.1; H1au1a; Asia_W_Europe; 15; A93G; A263G; C315CC     | 16569 | Asia_W_Europe         | H1au1a     | H           | H            | 15             |
| 1705 | JQ703507.1           | JQ703507.1; H6a1a4; Asia_W_Europe; 17; T239C; A263G; C309CCT   | 16570 | Asia_W_Europe         | H6a1a4     | H           | H            | 17             |
| 1706 | JQ703508.1           | JQ703508.1; T2b4f; Asia_W; 37; A73G; T152C; A263G              | 16570 | Asia_W                | T2b4f      | T           | T            | 37             |
| 1707 | JQ703509.1           | JQ703509.1; H2a1a2; Asia_W_Europe; 14; A263G; C315CC; A750G    | 16569 | Asia_W_Europe         | H2a1a2     | H           | H            | 14             |
| 1708 | JQ703510.1           | JQ703510.1; H11a2; Asia_W_Europe; 20; T195C; A263G; C309CCT    | 16570 | Asia_W_Europe         | H11a2      | H           | H            | 20             |
| 1709 | JQ703511.1           | JQ703511.1; W4a1; Asia_W; 35; A73G; G143A; A189G               | 16569 | Asia_W                | W4a1       | W           | W            | 35             |
| 1710 | JQ703512.1           | JQ703512.1; H1; Asia_W_Europe; 12; A263G; C309CCT; T310C       | 16570 | Asia_W_Europe         | H1         | H           | H            | 12             |
| 1711 | JQ703513.1           | JQ703513.1; H5a1g1a; Asia_W_Europe; 19; A263G; C315CC; A444G   | 16567 | Asia_W_Europe         | H5a1g1a    | H           | H            | 19             |
| 1712 | JQ703514.1           | JQ703514.1; B4f; Asia_SE_E_America_N_S; 35; A73G; A200G; A263G | 16563 | Asia_SE_E_America_N_S | B4f        | B           | B            | 35             |
| 1713 | JQ703515.1           | JQ703515.1; J2b1a4; Asia_W; 35; A73G; C150T; T152C             | 16569 | Asia_W                | J2b1a4     | J           | J            | 35             |
| 1714 | JQ703516.1           | JQ703516.1; J1c12a; Asia_W; 34; A73G; G185A; A189G             | 16572 | Asia_W                | J1c12a     | J           | J            | 34             |
| 1715 | JQ703517.1           | JQ703517.1; J2b1a; Asia_W; 36; A73G; C150T; T152C              | 16570 | Asia_W                | J2b1a      | J           | J            | 36             |
| 1716 | JQ703518.1           | JQ703518.1; H1a1; Asia_W_Europe; 16; A73G; T195C; A263G        | 16570 | Asia_W_Europe         | H1a1       | H           | H            | 16             |
| 1717 | JQ703519.1           | JQ703519.1; H6c; Asia_W_Europe; 15; T239C; A263G; C309CCCT     | 16571 | Asia_W_Europe         | H6c        | H           | H            | 15             |
| 1718 | JQ703520.1           | JQ703520.1; H; Asia_W_Europe; 10; A263G; C309CCCT; T310C       | 16571 | Asia_W_Europe         | H          | H           | H            | 10             |
| 1719 | JQ703521.1           | JQ703521.1; K2a6; Asia_W; 33; A73G; T146C; T152C               | 16570 | Asia_W                | K2a6       | K           | K            | 33             |
| 1720 | JQ703522.1           | JQ703522.1; K1a23; Asia_W; 38; A73G; A249d; A263G              | 16572 | Asia_W                | K1a23      | K           | K            | 38             |
| 1721 | JQ703523.1           | JQ703523.1; K1a4c1; Asia_W; 38; A73G; T152C; A263G             | 16570 | Asia_W                | K1a4c1     | K           | K            | 38             |
| 1722 | JQ703524.1           | JQ703524.1; J2a1a1a2; Asia_W; 43; A73G; T146C; C150T           | 16570 | Asia_W                | J2a1a1a2   | J           | J            | 43             |

**Supplementary Table S3** Human mitochondrial database (hMITO DB v1.0) metadata

| Row  | Name (accession no.) | Description                                                        | Size  | Geo_Region       | Haplogroup  | Macro_ Haplo | Macro_ Haplo2 | Total Variants |
|------|----------------------|--------------------------------------------------------------------|-------|------------------|-------------|--------------|---------------|----------------|
| 1723 | JQ703525.1           | JQ703525.1; H1; Asia_W_Europe; 13; T146C; A153G; A263G             | 16572 | Asia_W_Europe    | H1          | H            | H             | 13             |
| 1724 | JQ703526.1           | JQ703526.1; K1a13; Asia_W; 38; A73G; T146C; T152C                  | 16574 | Asia_W           | K1a13       | K            | K             | 38             |
| 1725 | JQ703527.1           | JQ703527.1; H1z; Asia_W_Europe; 14; A263G; C309CCCT; T310C         | 16571 | Asia_W_Europe    | H1z         | H            | H             | 14             |
| 1726 | JQ703528.1           | JQ703528.1; K1a3a; Asia_W; 35; A73G; C150T; A263G                  | 16569 | Asia_W           | K1a3a       | K            | K             | 35             |
| 1727 | JQ703529.1           | JQ703529.1; H8c2; Asia_W_Europe; 20; C114T; T146C; T152C           | 16571 | Asia_W_Europe    | H8c2        | H            | H             | 20             |
| 1728 | JQ703530.1           | JQ703530.1; U2e1a1; Asia_S_W_Europe; 42; A73G; T152C; T217C        | 16572 | Asia_S_W_Europe  | U2e1a1      | U            | U2            | 42             |
| 1729 | JQ703531.1           | JQ703531.1; H18; Asia_W_Europe; 12; A263G; C309CCT; T310C          | 16570 | Asia_W_Europe    | H18         | H            | H             | 12             |
| 1730 | JQ703532.1           | JQ703532.1; H4a1a1a2; Asia_W_Europe; 26; A73G; G228T; A263G        | 16568 | Asia_W_Europe    | H4a1a1a2    | H            | H             | 26             |
| 1731 | JQ703533.1           | JQ703533.1; H3; Asia_W_Europe; 15; T195C; A263G; C315CC            | 16569 | Asia_W_Europe    | H3          | H            | H             | 15             |
| 1732 | JQ703534.1           | JQ703534.1; K2a6; Asia_W; 33; A73G; T146C; T152C                   | 16569 | Asia_W           | K2a6        | K            | K             | 33             |
| 1733 | JQ703535.1           | JQ703535.1; H1h1; Asia_W_Europe; 14; A263G; C309CCT; T310C         | 16570 | Asia_W_Europe    | H1h1        | H            | H             | 14             |
| 1734 | JQ703536.1           | JQ703536.1; H1j2; Asia_W_Europe; 16; A263G; C309CCCT; T310C        | 16571 | Asia_W_Europe    | H1j2        | H            | H             | 16             |
| 1735 | JQ703537.1           | JQ703537.1; H1a; Asia_W_Europe; 13; A73G; T146C; A263G             | 16570 | Asia_W_Europe    | H1a         | H            | H             | 13             |
| 1736 | JQ703538.1           | JQ703538.1; J2b1a4; Asia_W; 35; A73G; C150T; T152C                 | 16570 | Asia_W           | J2b1a4      | J            | J             | 35             |
| 1737 | JQ703539.1           | JQ703539.1; H10+(16093); Asia_W_Europe; 12; T204C; A263G; C309CCCT | 16570 | Asia_W_Europe    | H10+(16093) | H            | H             | 12             |
| 1738 | JQ703540.1           | JQ703540.1; K2a3a; Asia_W; 35; A73G; T146C; T152C                  | 16570 | Asia_W           | K2a3a       | K            | K             | 35             |
| 1739 | JQ703541.1           | JQ703541.1; H1u1; Asia_W_Europe; 15; T146C; A263G; C309CCCT        | 16570 | Asia_W_Europe    | H1u1        | H            | H             | 15             |
| 1740 | JQ703542.1           | JQ703542.1; H4a1a2a; Asia_W_Europe; 18; A263G; C315CC; CA522d      | 16567 | Asia_W_Europe    | H4a1a2a     | H            | H             | 18             |
| 1741 | JQ703543.1           | JQ703543.1; H11b1; Asia_W_Europe; 18; T146C; T195C; A263G          | 16570 | Asia_W_Europe    | H11b1       | H            | H             | 18             |
| 1742 | JQ703544.1           | JQ703544.1; H3w; Asia_W_Europe; 15; A263G; C309CCCT; T310C         | 16570 | Asia_W_Europe    | H3w         | H            | H             | 15             |
| 1743 | JQ703545.1           | JQ703545.1; J1b1b1; Asia_W; 34; A73G; A263G; C295T                 | 16568 | Asia_W           | J1b1b1      | J            | J             | 34             |
| 1744 | JQ703546.1           | JQ703546.1; H; Asia_W_Europe; 11; A263G; C315CC; CA522d            | 16567 | Asia_W_Europe    | H           | H            | H             | 11             |
| 1745 | JQ703547.1           | JQ703547.1; H5s; Asia_W_Europe; 13; A263G; C309CCCT; T310C         | 16570 | Asia_W_Europe    | H5s         | H            | H             | 13             |
| 1746 | JQ703548.1           | JQ703548.1; K1a4a1f; Asia_W; 38; A73G; T152C; A263G                | 16569 | Asia_W           | K1a4a1f     | K            | K             | 38             |
| 1747 | JQ703549.1           | JQ703549.1; H3+152; Asia_W_Europe; 14; T152C; A263G; C309CCCT      | 16572 | Asia_W_Europe    | H3+152      | H            | H             | 14             |
| 1748 | JQ703550.1           | JQ703550.1; H5+709; Asia_W_Europe; 14; A263G; C309CCCT; T310C      | 16571 | Asia_W_Europe    | H5+709      | H            | H             | 14             |
| 1749 | JQ703551.1           | JQ703551.1; H1c15; Asia_W_Europe; 13; A263G; C309CCCT; T310C       | 16573 | Asia_W_Europe    | H1c15       | H            | H             | 13             |
| 1750 | JQ703552.1           | JQ703552.1; J2a1a1c; Asia_W; 40; A73G; C150T; T152C                | 16570 | Asia_W           | J2a1a1c     | J            | J             | 40             |
| 1751 | JQ703553.1           | JQ703553.1; K2a10; Asia_W; 33; A73G; T146C; T152C                  | 16570 | Asia_W           | K2a10       | K            | K             | 33             |
| 1752 | JQ703554.1           | JQ703554.1; H2a1a1; Asia_W_Europe; 14; A263G; C315CC; A750G        | 16569 | Asia_W_Europe    | H2a1a1      | H            | H             | 14             |
| 1753 | JQ703555.1           | JQ703555.1; H3c1; Asia_W_Europe; 14; A263G; C309CCCT; T310C        | 16571 | Asia_W_Europe    | H3c1        | H            | H             | 14             |
| 1754 | JQ703556.1           | JQ703556.1; J1c2; Asia_W; 30; A73G; G185A; A188G                   | 16571 | Asia_W           | J1c2        | J            | J             | 30             |
| 1755 | JQ703557.1           | JQ703557.1; J1c1; Asia_W; 28; A73G; G185A; A263G                   | 16569 | Asia_W           | J1c1        | J            | J             | 28             |
| 1756 | JQ703558.1           | JQ703558.1; J1c5a1; Asia_W; 34; A73G; G185A; G228A                 | 16570 | Asia_W           | J1c5a1      | J            | J             | 34             |
| 1757 | JQ703559.1           | JQ703559.1; H6c1; Asia_W_Europe; 15; T239C; A263G; C309CCCT        | 16570 | Asia_W_Europe    | H6c1        | H            | H             | 15             |
| 1758 | JQ703560.1           | JQ703560.1; X2b4; Asia_W_America_N; 32; A73G; A153G; T195C         | 16569 | Asia_W_America_N | X2b4        | X            | X             | 32             |
| 1759 | JQ703561.1           | JQ703561.1; H1as1; Asia_W_Europe; 14; C150T; A263G; C315CC         | 16569 | Asia_W_Europe    | H1as1       | H            | H             | 14             |
| 1760 | JQ703562.1           | JQ703562.1; J1c7a; Asia_W; 33; A73G; T146C; G185A                  | 16569 | Asia_W           | J1c7a       | J            | J             | 33             |
| 1761 | JQ703563.1           | JQ703563.1; H1a; Asia_W_Europe; 12; A73G; A263G; C315CC            | 16569 | Asia_W_Europe    | H1a         | H            | H             | 12             |
| 1762 | JQ703564.1           | JQ703564.1; H45a; Asia_W_Europe; 12; A263G; C309CCCT; T310C        | 16570 | Asia_W_Europe    | H45a        | H            | H             | 12             |
| 1763 | JQ703565.1           | JQ703565.1; J1c3c; Asia_W; 28; A73G; G185A; A263G                  | 16569 | Asia_W           | J1c3c       | J            | J             | 28             |

**Supplementary Table S3** Human mitochondrial database (hMITO DB v1.0) metadata

| Row  | Name (accession no.) | Description                                                     | Size  | Geo_Region      | Haplogroup | Macro_Haplo | Macro_Haplo2 | Total Variants |
|------|----------------------|-----------------------------------------------------------------|-------|-----------------|------------|-------------|--------------|----------------|
| 1764 | JQ703566.1           | JQ703566.1; J2a1a1a2; Asia_W; 41; A73G; C150T; T152C            | 16570 | Asia_W          | J2a1a1a2   | J           | J            | 41             |
| 1765 | JQ703567.1           | JQ703567.1; J1c2b4; Asia_W; 33; A73G; G185A; A188G              | 16570 | Asia_W          | J1c2b4     | J           | J            | 33             |
| 1766 | JQ703568.1           | JQ703568.1; J2a1a1a3; Asia_W; 42; A73G; C150T; T152C            | 16570 | Asia_W          | J2a1a1a3   | J           | J            | 42             |
| 1767 | JQ703569.1           | JQ703569.1; J1b1a1; Asia_W; 36; A73G; C242T; A263G              | 16569 | Asia_W          | J1b1a1     | J           | J            | 36             |
| 1768 | JQ703570.1           | JQ703570.1; J2a1a1a2; Asia_W; 42; A73G; C150T; T152C            | 16571 | Asia_W          | J2a1a1a2   | J           | J            | 42             |
| 1769 | JQ703571.1           | JQ703571.1; H1bs; Asia_W_Europe; 16; A263G; C309CCCT; T310C     | 16571 | Asia_W_Europe   | H1bs       | H           | H            | 16             |
| 1770 | JQ703572.1           | JQ703572.1; J1c5; Asia_W; 29; A73G; G185A; G228A                | 16571 | Asia_W          | J1c5       | J           | J            | 29             |
| 1771 | JQ703573.1           | JQ703573.1; H3g1; Asia_W_Europe; 15; T152C; A263G; C315CC       | 16569 | Asia_W_Europe   | H3g1       | H           | H            | 15             |
| 1772 | JQ703574.1           | JQ703574.1; J1b1a1a; Asia_W; 39; A73G; C242T; A263G             | 16569 | Asia_W          | J1b1a1a    | J           | J            | 39             |
| 1773 | JQ703575.1           | JQ703575.1; J1c2o; Asia_W; 34; A73G; G185A; A188G               | 16569 | Asia_W          | J1c2o      | J           | J            | 34             |
| 1774 | JQ703576.1           | JQ703576.1; H1e1a6; Asia_W_Europe; 16; C150T; A263G; C309CCCT   | 16571 | Asia_W_Europe   | H1e1a6     | H           | H            | 16             |
| 1775 | JQ703577.1           | JQ703577.1; H5a1; Asia_W_Europe; 13; A263G; C315CC; C456T       | 16567 | Asia_W_Europe   | H5a1       | H           | H            | 13             |
| 1776 | JQ703578.1           | JQ703578.1; H20a1a; Asia_W_Europe; 15; A249d; A263G; T292C      | 16569 | Asia_W_Europe   | H20a1a     | H           | H            | 15             |
| 1777 | JQ703579.1           | JQ703579.1; H1ba; Asia_W_Europe; 12; A263G; C315CC; A750G       | 16569 | Asia_W_Europe   | H1ba       | H           | H            | 12             |
| 1778 | JQ703580.1           | JQ703580.1; J2b1a1; Asia_W; 34; A73G; C150T; T152C              | 16570 | Asia_W          | J2b1a1     | J           | J            | 34             |
| 1779 | JQ703581.1           | JQ703581.1; K1a2a2; Asia_W; 33; A73G; A263G; C315CC             | 16569 | Asia_W          | K1a2a2     | K           | K            | 33             |
| 1780 | JQ703582.1           | JQ703582.1; H2a1c; Asia_W_Europe; 10; A263G; C309CCCT; T310C    | 16570 | Asia_W_Europe   | H2a1c      | H           | H            | 10             |
| 1781 | JQ703583.1           | JQ703583.1; J1c7a; Asia_W; 35; A73G; T146C; G185A               | 16569 | Asia_W          | J1c7a      | J           | J            | 35             |
| 1782 | JQ703584.1           | JQ703584.1; J1c13; Asia_W; 33; A73G; G185A; A189G               | 16569 | Asia_W          | J1c13      | J           | J            | 33             |
| 1783 | JQ703585.1           | JQ703585.1; J1b1a1+146; Asia_W; 38; A73G; T146C; C242T          | 16570 | Asia_W          | J1b1a1+146 | J           | J            | 38             |
| 1784 | JQ703586.1           | JQ703586.1; J1c3b1a; Asia_W; 33; A73G; G185A; A263G             | 16570 | Asia_W          | J1c3b1a    | J           | J            | 33             |
| 1785 | JQ703587.1           | JQ703587.1; J2b1a2; Asia_W; 35; A73G; C150T; T152C              | 16570 | Asia_W          | J2b1a2     | J           | J            | 35             |
| 1786 | JQ703588.1           | JQ703588.1; J1b1a1a; Asia_W; 40; A73G; C242T; A263G             | 16570 | Asia_W          | J1b1a1a    | J           | J            | 40             |
| 1787 | JQ703589.1           | JQ703589.1; U2e1a1; Asia_S_W_Europe; 41; A73G; T152C; T217C     | 16573 | Asia_S_W_Europe | U2e1a1     | U           | U2           | 41             |
| 1788 | JQ703590.1           | JQ703590.1; U5a1a1c; Asia_W_Europe_C; 29; A73G; A263G; C309CCCT | 16570 | Asia_W_Europe_C | U5a1a1c    | U           | U5           | 29             |
| 1789 | JQ703591.1           | JQ703591.1; J1c2; Asia_W; 33; A73G; G185A; A188G                | 16568 | Asia_W          | J1c2       | J           | J            | 33             |
| 1790 | JQ703592.1           | JQ703592.1; H3h1; Asia_W_Europe; 15; T152C; A263G; C309CCCT     | 16570 | Asia_W_Europe   | H3h1       | H           | H            | 15             |
| 1791 | JQ703593.1           | JQ703593.1; H11a; Asia_W_Europe; 16; T146C; T195C; A263G        | 16569 | Asia_W_Europe   | H11a       | H           | H            | 16             |
| 1792 | JQ703594.1           | JQ703594.1; J1c1b2; Asia_W; 32; A73G; A263G; C295T              | 16567 | Asia_W          | J1c1b2     | J           | J            | 32             |
| 1793 | JQ703595.1           | JQ703595.1; J1b1a3; Asia_W; 38; A73G; C242T; A263G              | 16570 | Asia_W          | J1b1a3     | J           | J            | 38             |
| 1794 | JQ703596.1           | JQ703596.1; H33b; Asia_W_Europe; 12; A263G; C309CCCT; T310C     | 16570 | Asia_W_Europe   | H33b       | H           | H            | 12             |
| 1795 | JQ703597.1           | JQ703597.1; J1c3; Asia_W; 32; A73G; T146C; T152C                | 16569 | Asia_W          | J1c3       | J           | J            | 32             |
| 1796 | JQ703598.1           | JQ703598.1; H3ae; Asia_W_Europe; 13; A263G; C309CCCT; T310C     | 16570 | Asia_W_Europe   | H3ae       | H           | H            | 13             |
| 1797 | JQ703599.1           | JQ703599.1; J1c1b1a1; Asia_W; 36; A73G; G185A; G228A            | 16570 | Asia_W          | J1c1b1a1   | J           | J            | 36             |
| 1798 | JQ703600.1           | JQ703600.1; U5b1b1a1b; Asia_W_Europe_C; 31; A73G; C150T; A263G  | 16569 | Asia_W_Europe_C | U5b1b1a1b  | U           | U5           | 31             |
| 1799 | JQ703601.1           | JQ703601.1; H7c2; Asia_W_Europe; 12; A263G; C309CCCT; T310C     | 16571 | Asia_W_Europe   | H7c2       | H           | H            | 12             |
| 1800 | JQ703602.1           | JQ703602.1; J1c3c2; Asia_W; 31; A73G; G185A; G228A              | 16570 | Asia_W          | J1c3c2     | J           | J            | 31             |
| 1801 | JQ703603.1           | JQ703603.1; H1e1c; Asia_W_Europe; 17; T152C; A263G; C309CCCT    | 16570 | Asia_W_Europe   | H1e1c      | H           | H            | 17             |
| 1802 | JQ703604.1           | JQ703604.1; J1c5b; Asia_W; 31; A73G; G185A; G228A               | 16569 | Asia_W          | J1c5b      | J           | J            | 31             |
| 1803 | JQ703605.1           | JQ703605.1; J2a2b2; Asia_W; 38; A73G; C150T; T195C              | 16569 | Asia_W          | J2a2b2     | J           | J            | 38             |
| 1804 | JQ703606.1           | JQ703606.1; H; Asia_W_Europe; 11; A263G; C309CCCT; T310C        | 16570 | Asia_W_Europe   | H          | H           | H            | 11             |

**Supplementary Table S3** Human mitochondrial database (hMITO DB v1.0) metadata

| Row  | Name (accession no.) | Description                                                               | Size  | Geo_Region            | Haplogroup   | Macro_Haplo | Macro_Haplo2 | Total Variants |
|------|----------------------|---------------------------------------------------------------------------|-------|-----------------------|--------------|-------------|--------------|----------------|
| 1805 | JQ703607.1           | JQ703607.1; K1a11a; Asia_W; 40; A16T; A73G; C150T                         | 16561 | Asia_W                | K1a11a       | K           | K            | 40             |
| 1806 | JQ703608.1           | JQ703608.1; H27a; Asia_W_Europe; 15; A263G; C309CCCT; T310C               | 16571 | Asia_W_Europe         | H27a         | H           | H            | 15             |
| 1807 | JQ703609.1           | JQ703609.1; J1c1b1a; Asia_W; 34; A73G; G185A; G228A                       | 16566 | Asia_W                | J1c1b1a      | J           | J            | 34             |
| 1808 | JQ703610.1           | JQ703610.1; J1c2b2; Asia_W; 33; A73G; G185A; A188G                        | 16570 | Asia_W                | J1c2b2       | J           | J            | 33             |
| 1809 | JQ703611.1           | JQ703611.1; H1+16189; Asia_W_Europe; 15; T146C; A263G; C309CCCT           | 16571 | Asia_W_Europe         | H1+16189     | H           | H            | 15             |
| 1810 | JQ703612.1           | JQ703612.1; J1c2; Asia_W; 32; A73G; G185A; A188G                          | 16570 | Asia_W                | J1c2         | J           | J            | 32             |
| 1811 | JQ703613.1           | JQ703613.1; J1c2b1; Asia_W; 34; A73G; G185A; A188G                        | 16570 | Asia_W                | J1c2b1       | J           | J            | 34             |
| 1812 | JQ703614.1           | JQ703614.1; U5a1a1; Asia_W_Europe_C; 28; A73G; A263G; C309CCT             | 16570 | Asia_W_Europe_C       | U5a1a1       | U           | U5           | 28             |
| 1813 | JQ703615.1           | JQ703615.1; HV5a; Asia_W; 12; A263G; C315CC; A750G                        | 16569 | Asia_W                | HV5a         | HV          | HV           | 12             |
| 1814 | JQ703616.1           | JQ703616.1; H1a1b; Asia_W_Europe; 15; A73G; A263G; C315CC                 | 16569 | Asia_W_Europe         | H1a1b        | H           | H            | 15             |
| 1815 | JQ703617.1           | JQ703617.1; H1c; Asia_W_Europe; 11; A263G; C315CC; T477C                  | 16569 | Asia_W_Europe         | H1c          | H           | H            | 11             |
| 1816 | JQ703618.1           | JQ703618.1; L1b1a7a; Africa_C; 81; A73G; T152C; C182T                     | 16567 | Africa_C              | L1b1a7a      | L1          | L1           | 81             |
| 1817 | JQ703619.1           | JQ703619.1; H3; Asia_W_Europe; 12; A263G; C309CCCT; T310C                 | 16571 | Asia_W_Europe         | H3           | H           | H            | 12             |
| 1818 | JQ703620.1           | JQ703620.1; H5a1e; Asia_W_Europe; 14; A263G; C315CC; C456T                | 16567 | Asia_W_Europe         | H5a1e        | H           | H            | 14             |
| 1819 | JQ703621.1           | JQ703621.1; L3f1b; Africa_E; 38; A73G; A189G; A200G                       | 16566 | Africa_E              | L3f1b        | L3          | L3           | 38             |
| 1820 | JQ703622.1           | JQ703622.1; H6a1b2; Asia_W_Europe; 17; T239C; A263G; C309CCT              | 16570 | Asia_W_Europe         | H6a1b2       | H           | H            | 17             |
| 1821 | JQ703623.1           | JQ703623.1; J1c1; Asia_W; 30; A73G; G185A; A263G                          | 16569 | Asia_W                | J1c1         | J           | J            | 30             |
| 1822 | JQ703624.1           | JQ703624.1; U5a1b1a; Asia_W_Europe_C; 31; A73G; A263G; A272G              | 16569 | Asia_W_Europe_C       | U5a1b1a      | U           | U5           | 31             |
| 1823 | JQ703625.1           | JQ703625.1; L3e3b; Africa_E; 40; A73G; C150T; T195C                       | 16567 | Africa_E              | L3e3b        | L3          | L3           | 40             |
| 1824 | JQ703626.1           | JQ703626.1; U5a2a1a; Asia_W_Europe_C; 30; A73G; A263G; C309CCCT           | 16570 | Asia_W_Europe_C       | U5a2a1a      | U           | U5           | 30             |
| 1825 | JQ703627.1           | JQ703627.1; H5c2; Asia_W_Europe; 13; A263G; C315CC; C456T                 | 16569 | Asia_W_Europe         | H5c2         | H           | H            | 13             |
| 1826 | JQ703628.1           | JQ703628.1; U5b2a2b1; Asia_W_Europe_C; 34; A73G; C150T; A263G             | 16570 | Asia_W_Europe_C       | U5b2a2b1     | U           | U5           | 34             |
| 1827 | JQ703629.1           | JQ703629.1; K2a2a1; Asia_W; 38; A73G; T146C; T152C                        | 16569 | Asia_W                | K2a2a1       | K           | K            | 38             |
| 1828 | JQ703630.1           | JQ703630.1; H4a1c1; Asia_W_Europe; 20; A263G; C309CCT; T310C              | 16568 | Asia_W_Europe         | H4a1c1       | H           | H            | 20             |
| 1829 | JQ703631.1           | JQ703631.1; H1j7; Asia_W_Europe; 15; A263G; C309CCCT; T310C               | 16571 | Asia_W_Europe         | H1j7         | H           | H            | 15             |
| 1830 | JQ703632.1           | JQ703632.1; H5q; Asia_W_Europe; 12; C150T; A263G; C315CC                  | 16569 | Asia_W_Europe         | H5q          | H           | H            | 12             |
| 1831 | JQ703633.1           | JQ703633.1; R1b1; Asia_S_SE; 32; A73G; T146C; C150T                       | 16573 | Asia_S_SE             | R1b1         | R           | R1           | 32             |
| 1832 | JQ703634.1           | JQ703634.1; H1b1+16362; Asia_W_Europe; 16; A263G; C315CC; CA522d          | 16567 | Asia_W_Europe         | H1b1+16362   | H           | H            | 16             |
| 1833 | JQ703635.1           | JQ703635.1; H1bu; Asia_W_Europe; 11; A263G; C315CC; A750G                 | 16569 | Asia_W_Europe         | H1bu         | H           | H            | 11             |
| 1834 | JQ703636.1           | JQ703636.1; H24a; Asia_W_Europe; 12; T146C; A263G; C309CCT                | 16570 | Asia_W_Europe         | H24a         | H           | H            | 12             |
| 1835 | JQ703637.1           | JQ703637.1; H1c9a; Asia_W_Europe; 14; T152C; A263G; C309CCCT              | 16571 | Asia_W_Europe         | H1c9a        | H           | H            | 14             |
| 1836 | JQ703638.1           | JQ703638.1; J2a1a1a2; Asia_W; 42; A73G; C150T; T152C                      | 16570 | Asia_W                | J2a1a1a2     | J           | J            | 42             |
| 1837 | JQ703639.1           | JQ703639.1; J1c5b; Asia_W; 33; A73G; G185A; G228A                         | 16569 | Asia_W                | J1c5b        | J           | J            | 33             |
| 1838 | JQ703640.1           | JQ703640.1; V11; Europe_S; 18; T72C; A263G; C309CCCT                      | 16571 | Europe_S              | V11          | V           | V            | 18             |
| 1839 | JQ703641.1           | JQ703641.1; B4a(B4a1c3a); Asia_SE_E_America_N_S; 3; C309CCT; T310C; G709A | 16570 | Asia_SE_E_America_N_S | B4a(B4a1c3a) | B           | B            | 3              |
| 1840 | JQ703642.1           | JQ703642.1; U5a2a1e; Asia_W_Europe_C; 29; A73G; T152C; A263G              | 16569 | Asia_W_Europe_C       | U5a2a1e      | U           | U5           | 29             |
| 1841 | JQ703643.1           | JQ703643.1; H5a1c1a; Asia_W_Europe; 18; A263G; C309CCT; T310C             | 16568 | Asia_W_Europe         | H5a1c1a      | H           | H            | 18             |
| 1842 | JQ703644.1           | JQ703644.1; H5; Asia_W_Europe; 13; A263G; C309CCT; T310C                  | 16570 | Asia_W_Europe         | H5           | H           | H            | 13             |
| 1843 | JQ703645.1           | JQ703645.1; H10e1a; Asia_W_Europe; 14; A263G; C309CCT; T310C              | 16570 | Asia_W_Europe         | H10e1a       | H           | H            | 14             |
| 1844 | JQ703646.1           | JQ703646.1; H1c3; Asia_W_Europe; 14; T195C; A257G; A263G                  | 16571 | Asia_W_Europe         | H1c3         | H           | H            | 14             |
| 1845 | JQ703647.1           | JQ703647.1; V2; Europe_S; 20; T72C; A263G; C309CCCT                       | 16571 | Europe_S              | V2           | V           | V            | 20             |

**Supplementary Table S3** Human mitochondrial database (hMITO DB v1.0) metadata

| Row  | Name (accession no.) | Description                                                    | Size  | Geo_Region    | Haplogroup | Macro_Haplo | Macro_Haplo2 | Total Variants |
|------|----------------------|----------------------------------------------------------------|-------|---------------|------------|-------------|--------------|----------------|
| 1846 | JQ703648.1           | JQ703648.1; K1a3a1; Asia_W; 35; A73G; A263G; C309CCT           | 16572 | Asia_W        | K1a3a1     | K           | K            | 35             |
| 1847 | JQ703649.1           | JQ703649.1; H4a1a1; Asia_W_Europe; 17; A263G; C315CC; A750G    | 16569 | Asia_W_Europe | H4a1a1     | H           | H            | 17             |
| 1848 | JQ703650.1           | JQ703650.1; H13a1a1a; Asia_W_Europe; 19; T152C; A263G; C309CCT | 16570 | Asia_W_Europe | H13a1a1a   | H           | H            | 19             |
| 1849 | JQ703651.1           | JQ703651.1; K1a9; Asia_W; 33; A73G; T195C; A263G               | 16569 | Asia_W        | K1a9       | K           | K            | 33             |
| 1850 | JQ703652.1           | JQ703652.1; I1a1a; Asia_W_SW; 44; A73G; T199C; G203A           | 16573 | Asia_W_SW     | I1a1a      | I           | I            | 44             |
| 1851 | JQ703653.1           | JQ703653.1; J1c1c; Asia_W; 33; A73G; C150T; G185A              | 16567 | Asia_W        | J1c1c      | J           | J            | 33             |
| 1852 | JQ703654.1           | JQ703654.1; H10b; Asia_W_Europe; 12; A263G; C309CCT; T310C     | 16570 | Asia_W_Europe | H10b       | H           | H            | 12             |
| 1853 | JQ703655.1           | JQ703655.1; H1aj1a; Asia_W_Europe; 16; G207A; A263G; C315CC    | 16569 | Asia_W_Europe | H1aj1a     | H           | H            | 16             |
| 1854 | JQ703656.1           | JQ703656.1; J1b1b2; Asia_W; 38; A73G; T152C; A263G             | 16570 | Asia_W        | J1b1b2     | J           | J            | 38             |
| 1855 | JQ703657.1           | JQ703657.1; H13c1; Asia_W_Europe; 18; A263G; C309CCT; T310C    | 16570 | Asia_W_Europe | H13c1      | H           | H            | 18             |
| 1856 | JQ703658.1           | JQ703658.1; H102; Asia_W_Europe; 13; A263G; C309CCT; T310C     | 16570 | Asia_W_Europe | H102       | H           | H            | 13             |
| 1857 | JQ703659.1           | JQ703659.1; HV9a1a; Asia_W; 20; T131C; T152C; T195C            | 16571 | Asia_W        | HV9a1a     | HV          | HV           | 20             |
| 1858 | JQ703660.1           | JQ703660.1; H27+16093; Asia_W_Europe; 17; A263G; C315CC; A750G | 16569 | Asia_W_Europe | H27+16093  | H           | H            | 17             |
| 1859 | JQ703661.1           | JQ703661.1; T2e; Asia_W; 35; A73G; C150T; A263G                | 16571 | Asia_W        | T2e        | T           | T            | 35             |
| 1860 | JQ703662.1           | JQ703662.1; K1a1b1a; Asia_W; 36; A73G; C114T; A263G            | 16569 | Asia_W        | K1a1b1a    | K           | K            | 36             |
| 1861 | JQ703663.1           | JQ703663.1; T2f1a1; Asia_W; 42; A73G; T195C; A263G             | 16560 | Asia_W        | T2f1a1     | T           | T            | 42             |
| 1862 | JQ703664.1           | JQ703664.1; H1+152; Asia_W_Europe; 12; T152C; A263G; C315CC    | 16569 | Asia_W_Europe | H1+152     | H           | H            | 12             |
| 1863 | JQ703665.1           | JQ703665.1; K1b2b; Asia_W; 39; A73G; T146C; T152C              | 16570 | Asia_W        | K1b2b      | K           | K            | 39             |
| 1864 | JQ703666.1           | JQ703666.1; V3; Europe_S; 16; T72C; A263G; C309CCCT            | 16571 | Europe_S      | V3         | V           | V            | 16             |
| 1865 | JQ703667.1           | JQ703667.1; V3; Europe_S; 17; T72C; A263G; C309CCCT            | 16571 | Europe_S      | V3         | V           | V            | 17             |
| 1866 | JQ703668.1           | JQ703668.1; H1bh; Asia_W_Europe; 13; A263G; C315CC; A750G      | 16569 | Asia_W_Europe | H1bh       | H           | H            | 13             |
| 1867 | JQ703669.1           | JQ703669.1; H1bb; Asia_W_Europe; 15; T152C; T199C; A263G       | 16571 | Asia_W_Europe | H1bb       | H           | H            | 15             |
| 1868 | JQ703670.1           | JQ703670.1; T1a1; Asia_W; 37; A73G; T152C; T195C               | 16570 | Asia_W        | T1a1       | T           | T            | 37             |
| 1869 | JQ703671.1           | JQ703671.1; J1c3b1; Asia_W; 31; A73G; G185A; A263G             | 16570 | Asia_W        | J1c3b1     | J           | J            | 31             |
| 1870 | JQ703672.1           | JQ703672.1; J1c2b4; Asia_W; 33; A73G; G185A; A188G             | 16569 | Asia_W        | J1c2b4     | J           | J            | 33             |
| 1871 | JQ703673.1           | JQ703673.1; J2a1a1a2; Asia_W; 41; A73G; C150T; T152C           | 16570 | Asia_W        | J2a1a1a2   | J           | J            | 41             |
| 1872 | JQ703674.1           | JQ703674.1; H10e1a; Asia_W_Europe; 15; A263G; C309CCT; T310C   | 16570 | Asia_W_Europe | H10e1a     | H           | H            | 15             |
| 1873 | JQ703675.1           | JQ703675.1; J1c2e; Asia_W; 33; A73G; G185A; A188G              | 16568 | Asia_W        | J1c2e      | J           | J            | 33             |
| 1874 | JQ703676.1           | JQ703676.1; H11a; Asia_W_Europe; 15; T195C; A263G; C309CCCT    | 16571 | Asia_W_Europe | H11a       | H           | H            | 15             |
| 1875 | JQ703677.1           | JQ703677.1; H3h1; Asia_W_Europe; 13; A263G; C315CC; A750G      | 16569 | Asia_W_Europe | H3h1       | H           | H            | 13             |
| 1876 | JQ703678.1           | JQ703678.1; H11a1; Asia_W_Europe; 17; T146C; T195C; A263G      | 16569 | Asia_W_Europe | H11a1      | H           | H            | 17             |
| 1877 | JQ703679.1           | JQ703679.1; K1c2; Asia_W; 36; A73G; T146C; T152C               | 16568 | Asia_W        | K1c2       | K           | K            | 36             |
| 1878 | JQ703680.1           | JQ703680.1; T2b; Asia_W; 34; A73G; A263G; C315CC               | 16569 | Asia_W        | T2b        | T           | T            | 34             |
| 1879 | JQ703681.1           | JQ703681.1; H1be; Asia_W_Europe; 12; A263G; C309CCCT; T310C    | 16571 | Asia_W_Europe | H1be       | H           | H            | 12             |
| 1880 | JQ703682.1           | JQ703682.1; J1c7; Asia_W; 31; A73G; G185A; G228A               | 16569 | Asia_W        | J1c7       | J           | J            | 31             |
| 1881 | JQ703683.1           | JQ703683.1; H1a3b1; Asia_W_Europe; 17; A73G; A263G; C315CC     | 16567 | Asia_W_Europe | H1a3b1     | H           | H            | 17             |
| 1882 | JQ703684.1           | JQ703684.1; H11; Asia_W_Europe; 14; T195C; A263G; C315CC       | 16569 | Asia_W_Europe | H11        | H           | H            | 14             |
| 1883 | JQ703685.1           | JQ703685.1; K1a4a1a2a; Asia_W; 40; A73G; A263G; C309CCT        | 16576 | Asia_W        | K1a4a1a2a  | K           | K            | 40             |
| 1884 | JQ703686.1           | JQ703686.1; J1c9; Asia_W; 30; A73G; G185A; G228A               | 16571 | Asia_W        | J1c9       | J           | J            | 30             |
| 1885 | JQ703687.1           | JQ703687.1; H1ah2; Asia_W_Europe; 14; A263G; C309CCT; T310C    | 16570 | Asia_W_Europe | H1ah2      | H           | H            | 14             |
| 1886 | JQ703688.1           | JQ703688.1; H11a1; Asia_W_Europe; 16; T146C; T195C; A263G      | 16569 | Asia_W_Europe | H11a1      | H           | H            | 16             |

**Supplementary Table S3** Human mitochondrial database (hMITO DB v1.0) metadata

| Row  | Name (accession no.) | Description                                                     | Size  | Geo_Region       | Haplogroup | Macro_ Haplo | Macro_ Haplo2 | Total Variants |
|------|----------------------|-----------------------------------------------------------------|-------|------------------|------------|--------------|---------------|----------------|
| 1887 | JQ703689.1           | JQ703689.1; H3b7; Asia_W_Europe; 14; A93G; A263G; C309CCCT      | 16571 | Asia_W_Europe    | H3b7       | H            | H             | 14             |
| 1888 | JQ703690.1           | JQ703690.1; H3z1; Asia_W_Europe; 14; A263G; T293C; C315CC       | 16569 | Asia_W_Europe    | H3z1       | H            | H             | 14             |
| 1889 | JQ703691.1           | JQ703691.1; T2c1a; Asia_W; 40; A73G; T152C; G185A               | 16572 | Asia_W           | T2c1a      | T            | T             | 40             |
| 1890 | JQ703692.1           | JQ703692.1; T2a1b1a1a2; Asia_W; 45; A73G; T146C; T152C          | 16570 | Asia_W           | T2a1b1a1a2 | T            | T             | 45             |
| 1891 | JQ703693.1           | JQ703693.1; T1a; Asia_W; 36; A73G; A263G; C309CCT               | 16570 | Asia_W           | T1a        | T            | T             | 36             |
| 1892 | JQ703694.1           | JQ703694.1; U3b3; Africa_NE_Asia_W; 30; A73G; C150T; T152C      | 16570 | Africa_NE_Asia_W | U3b3       | U            | U3            | 30             |
| 1893 | JQ703695.1           | JQ703695.1; K1c1; Asia_W; 34; A73G; T146C; T152C                | 16568 | Asia_W           | K1c1       | K            | K             | 34             |
| 1894 | JQ703696.1           | JQ703696.1; K1c1c; Asia_W; 35; A73G; T146C; T152C               | 16568 | Asia_W           | K1c1c      | K            | K             | 35             |
| 1895 | JQ703697.1           | JQ703697.1; T2f8a; Asia_W; 35; A73G; A263G; C309CCT             | 16561 | Asia_W           | T2f8a      | T            | T             | 35             |
| 1896 | JQ703698.1           | JQ703698.1; H1e2; Asia_W_Europe; 12; A263G; C315CC; A750G       | 16569 | Asia_W_Europe    | H1e2       | H            | H             | 12             |
| 1897 | JQ703699.1           | JQ703699.1; T2b3+151; Asia_W; 42; A73G; C151T; A263G            | 16570 | Asia_W           | T2b3+151   | T            | T             | 42             |
| 1898 | JQ703700.1           | JQ703700.1; T2a1b1a1a1; Asia_W; 40; A73G; A263G; C315CC         | 16569 | Asia_W           | T2a1b1a1a1 | T            | T             | 40             |
| 1899 | JQ703701.1           | JQ703701.1; H44a; Asia_W_Europe; 12; A263G; C315CC; A750G       | 16569 | Asia_W_Europe    | H44a       | H            | H             | 12             |
| 1900 | JQ703702.1           | JQ703702.1; T2f2; Asia_W; 37; A73G; T195C; A263G                | 16562 | Asia_W           | T2f2       | T            | T             | 37             |
| 1901 | JQ703703.1           | JQ703703.1; X2c1c1; Asia_W_America_N; 31; A73G; A153G; T195C    | 16569 | Asia_W_America_N | X2c1c1     | X            | X             | 31             |
| 1902 | JQ703704.1           | JQ703704.1; K1a4a1; Asia_W; 34; A73G; A263G; C315CC             | 16569 | Asia_W           | K1a4a1     | K            | K             | 34             |
| 1903 | JQ703705.1           | JQ703705.1; H1+16189; Asia_W_Europe; 11; A263G; C315CC; A750G   | 16569 | Asia_W_Europe    | H1+16189   | H            | H             | 11             |
| 1904 | JQ703706.1           | JQ703706.1; H1am; Asia_W_Europe; 11; A263G; C309CCT; T310C      | 16570 | Asia_W_Europe    | H1am       | H            | H             | 11             |
| 1905 | JQ703707.1           | JQ703707.1; M6a1b; Asia_S; 48; A73G; T146C; T152C               | 16571 | Asia_S           | M6a1b      | M            | M6            | 48             |
| 1906 | JQ703708.1           | JQ703708.1; T1a1; Asia_W; 40; A73G; T152C; T195C                | 16570 | Asia_W           | T1a1       | T            | T             | 40             |
| 1907 | JQ703709.1           | JQ703709.1; H1i2a; Asia_W_Europe; 15; T152C; A263G; C315CC      | 16569 | Asia_W_Europe    | H1i2a      | H            | H             | 15             |
| 1908 | JQ703710.1           | JQ703710.1; T2b4; Asia_W; 34; A73G; A263G; C315CC               | 16569 | Asia_W           | T2b4       | T            | T             | 34             |
| 1909 | JQ703711.1           | JQ703711.1; K1a12a; Asia_W; 36; A73G; A263G; C309CCT            | 16572 | Asia_W           | K1a12a     | K            | K             | 36             |
| 1910 | JQ703712.1           | JQ703712.1; T2b5a1; Asia_W; 37; A73G; A263G; C315CC             | 16570 | Asia_W           | T2b5a1     | T            | T             | 37             |
| 1911 | JQ703713.1           | JQ703713.1; T2b11; Asia_W; 37; A73G; G207A; A263G               | 16570 | Asia_W           | T2b11      | T            | T             | 37             |
| 1912 | JQ703714.1           | JQ703714.1; T2b7a1; Asia_W; 40; A73G; T152C; A263G              | 16568 | Asia_W           | T2b7a1     | T            | T             | 40             |
| 1913 | JQ703715.1           | JQ703715.1; T2b31; Asia_W; 36; A73G; A263G; C309CCT             | 16570 | Asia_W           | T2b31      | T            | T             | 36             |
| 1914 | JQ703716.1           | JQ703716.1; T2b5a; Asia_W; 36; A73G; A263G; C309CCT             | 16570 | Asia_W           | T2b5a      | T            | T             | 36             |
| 1915 | JQ703717.1           | JQ703717.1; U5a1a2a; Asia_W_Europe_C; 36; A73G; A263G; C309CCCT | 16573 | Asia_W_Europe_C  | U5a1a2a    | U            | U5            | 36             |
| 1916 | JQ703718.1           | JQ703718.1; J1c2c1a; Asia_W; 36; A73G; T146C; G185A             | 16569 | Asia_W           | J1c2c1a    | J            | J             | 36             |
| 1917 | JQ703719.1           | JQ703719.1; H1c3; Asia_W_Europe; 16; T195C; A257G; A263G        | 16571 | Asia_W_Europe    | H1c3       | H            | H             | 16             |
| 1918 | JQ703720.1           | JQ703720.1; HV9+152; Asia_W; 16; T152C; A263G; C309CCT          | 16570 | Asia_W           | HV9+152    | HV           | HV            | 16             |
| 1919 | JQ703721.1           | JQ703721.1; H10e; Asia_W_Europe; 12; A263G; C309CCT; T310C      | 16570 | Asia_W_Europe    | H10e       | H            | H             | 12             |
| 1920 | JQ703722.1           | JQ703722.1; T2b; Asia_W; 36; A73G; A263G; C309CCT               | 16570 | Asia_W           | T2b        | T            | T             | 36             |
| 1921 | JQ703723.1           | JQ703723.1; H4a1a4b; Asia_W_Europe; 20; T195C; A263G; C315CC    | 16567 | Asia_W_Europe    | H4a1a4b    | H            | H             | 20             |
| 1922 | JQ703724.1           | JQ703724.1; T1a5; Asia_W; 33; A73G; A263G; C315CC               | 16569 | Asia_W           | T1a5       | T            | T             | 33             |
| 1923 | JQ703725.1           | JQ703725.1; H24a; Asia_W_Europe; 12; A263G; C315CC; A750G       | 16569 | Asia_W_Europe    | H24a       | H            | H             | 12             |
| 1924 | JQ703726.1           | JQ703726.1; K2a; Asia_W; 32; A73G; T146C; T152C                 | 16569 | Asia_W           | K2a        | K            | K             | 32             |
| 1925 | JQ703727.1           | JQ703727.1; E1a1a1b1; Asia_SE_Oceania; 41; A73G; A263G; C309CCT | 16570 | Asia_SE_Oceania  | E1a1a1b1   | E            | E             | 41             |
| 1926 | JQ703728.1           | JQ703728.1; T2b32; Asia_W; 39; A73G; A263G; C315CC              | 16569 | Asia_W           | T2b32      | T            | T             | 39             |
| 1927 | JQ703729.1           | JQ703729.1; H1y; Asia_W_Europe; 13; A263G; C315CC; C569A        | 16569 | Asia_W_Europe    | H1y        | H            | H             | 13             |

**Supplementary Table S3** Human mitochondrial database (hMITO DB v1.0) metadata

| Row  | Name (accession no.) | Description                                                   | Size  | Geo_Region          | Haplogroup | Macro_Haplo | Macro_Haplo2 | Total Variants |
|------|----------------------|---------------------------------------------------------------|-------|---------------------|------------|-------------|--------------|----------------|
| 1928 | JQ703730.1           | JQ703730.1; T2a1b1a; Asia_W; 40; A73G; A153G; T199C           | 16567 | Asia_W              | T2a1b1a    | T           | T            | 40             |
| 1929 | JQ703731.1           | JQ703731.1; H5a4; Asia_W_Europe; 17; A263G; C309CCCT; T310C   | 16571 | Asia_W_Europe       | H5a4       | H           | H            | 17             |
| 1930 | JQ703732.1           | JQ703732.1; H6a1b2; Asia_W_Europe; 18; T239C; A263G; C309CCCT | 16571 | Asia_W_Europe       | H6a1b2     | H           | H            | 18             |
| 1931 | JQ703733.1           | JQ703733.1; H11a7; Asia_W_Europe; 18; T152C; T195C; A263G     | 16569 | Asia_W_Europe       | H11a7      | H           | H            | 18             |
| 1932 | JQ703734.1           | JQ703734.1; T2b4d; Asia_W; 38; A73G; T152C; A263G             | 16570 | Asia_W              | T2b4d      | T           | T            | 38             |
| 1933 | JQ703735.1           | JQ703735.1; H1a3; Asia_W_Europe; 14; A73G; A263G; C309CCT     | 16570 | Asia_W_Europe       | H1a3       | H           | H            | 14             |
| 1934 | JQ703736.1           | JQ703736.1; D4b1c; Asia_E_America_N_S; 43; A73G; T239C; A263G | 16567 | Asia_E_America_N_S  | D4b1c      | D           | D            | 43             |
| 1935 | JQ703737.1           | JQ703737.1; K1a1b1f; Asia_W; 40; A73G; C114T; A263G           | 16570 | Asia_W              | K1a1b1f    | K           | K            | 40             |
| 1936 | JQ703738.1           | JQ703738.1; H5a1f; Asia_W_Europe; 13; A263G; C456T; CA522d    | 16566 | Asia_W_Europe       | H5a1f      | H           | H            | 13             |
| 1937 | JQ703739.1           | JQ703739.1; T1a1; Asia_W; 38; A73G; T152C; T195C              | 16570 | Asia_W              | T1a1       | T           | T            | 38             |
| 1938 | JQ703740.1           | JQ703740.1; J1c5e; Asia_W; 31; A73G; G185A; A263G             | 16569 | Asia_W              | J1c5e      | J           | J            | 31             |
| 1939 | JQ703741.1           | JQ703741.1; U5b2b1a1; Asia_W_Europe_C; 35; A73G; T146C; C150T | 16570 | Asia_W_Europe_C     | U5b2b1a1   | U           | U5           | 35             |
| 1940 | JQ703742.1           | JQ703742.1; H1q; Asia_W_Europe; 13; A263G; C315CC; A750G      | 16569 | Asia_W_Europe       | H1q        | H           | H            | 13             |
| 1941 | JQ703743.1           | JQ703743.1; C1c4; Asia_NE_America_N_S; 49; A73G; T152C; A214G | 16569 | Asia_NE_America_N_S | C1c4       | C           | C            | 49             |
| 1942 | JQ703744.1           | JQ703744.1; H3c; Asia_W_Europe; 15; A263G; C315CC; C573CCC    | 16572 | Asia_W_Europe       | H3c        | H           | H            | 15             |
| 1943 | JQ703745.1           | JQ703745.1; H1c5a; Asia_W_Europe; 14; T152C; A249d; A263G     | 16568 | Asia_W_Europe       | H1c5a      | H           | H            | 14             |
| 1944 | JQ703746.1           | JQ703746.1; J1c2e; Asia_W; 32; A73G; G185A; A188G             | 16568 | Asia_W              | J1c2e      | J           | J            | 32             |
| 1945 | JQ703747.1           | JQ703747.1; H66a1; Asia_W_Europe; 13; A73G; A263G; C309CCT    | 16570 | Asia_W_Europe       | H66a1      | H           | H            | 13             |
| 1946 | JQ703748.1           | JQ703748.1; U5a1b1h; Asia_W_Europe_C; 29; A73G; A263G; C315CC | 16567 | Asia_W_Europe_C     | U5a1b1h    | U           | U5           | 29             |
| 1947 | JQ703749.1           | JQ703749.1; V19; Europe_S; 17; T72C; C150T; A263G             | 16569 | Europe_S            | V19        | V           | V            | 17             |
| 1948 | JQ703750.1           | JQ703750.1; J1c5; Asia_W; 32; A73G; G185A; C198T              | 16567 | Asia_W              | J1c5       | J           | J            | 32             |
| 1949 | JQ703751.1           | JQ703751.1; H1bb; Asia_W_Europe; 14; T152C; A263G; C315CC     | 16573 | Asia_W_Europe       | H1bb       | H           | H            | 14             |
| 1950 | JQ703752.1           | JQ703752.1; K2a; Asia_W; 33; A73G; T146C; T152C               | 16569 | Asia_W              | K2a        | K           | K            | 33             |
| 1951 | JQ703753.1           | JQ703753.1; J1c3i; Asia_W; 31; A73G; G185A; G228A             | 16569 | Asia_W              | J1c3i      | J           | J            | 31             |
| 1952 | JQ703754.1           | JQ703754.1; T2d1a; Asia_W; 39; A73G; T152C; A263G             | 16570 | Asia_W              | T2d1a      | T           | T            | 39             |
| 1953 | JQ703755.1           | JQ703755.1; U5b1h; Asia_W_Europe_C; 28; A73G; C150T; A263G    | 16571 | Asia_W_Europe_C     | U5b1h      | U           | U5           | 28             |
| 1954 | JQ703756.1           | JQ703756.1; H1ae3a; Asia_W_Europe; 14; A263G; C309CCCT; T310C | 16571 | Asia_W_Europe       | H1ae3a     | H           | H            | 14             |
| 1955 | JQ703757.1           | JQ703757.1; H16b; Asia_W_Europe; 11; A263G; C315CC; A750G     | 16569 | Asia_W_Europe       | H16b       | H           | H            | 11             |
| 1956 | JQ703758.1           | JQ703758.1; H1a8a; Asia_W_Europe; 13; A73G; A263G; C315CC     | 16569 | Asia_W_Europe       | H1a8a      | H           | H            | 13             |
| 1957 | JQ703759.1           | JQ703759.1; H1a3a; Asia_W_Europe; 16; A73G; A263G; C309CCT    | 16570 | Asia_W_Europe       | H1a3a      | H           | H            | 16             |
| 1958 | JQ703760.1           | JQ703760.1; H2a1i; Asia_W_Europe; 13; C113T; A263G; C309CCT   | 16570 | Asia_W_Europe       | H2a1i      | H           | H            | 13             |
| 1959 | JQ703761.1           | JQ703761.1; H10c1; Asia_W_Europe; 17; A263G; C309CCT; T310C   | 16570 | Asia_W_Europe       | H10c1      | H           | H            | 17             |
| 1960 | JQ703762.1           | JQ703762.1; T2b13a; Asia_W; 39; A73G; A263G; C309CCT          | 16570 | Asia_W              | T2b13a     | T           | T            | 39             |
| 1961 | JQ703763.1           | JQ703763.1; K1a4a1a2b; Asia_W; 40; A73G; T146C; A153G         | 16570 | Asia_W              | K1a4a1a2b  | K           | K            | 40             |
| 1962 | JQ703764.1           | JQ703764.1; K1a10a; Asia_W; 34; A73G; T195C; A263G            | 16574 | Asia_W              | K1a10a     | K           | K            | 34             |
| 1963 | JQ703765.1           | JQ703765.1; H1n4; Asia_W_Europe; 13; T146C; A263G; C309CCCT   | 16571 | Asia_W_Europe       | H1n4       | H           | H            | 13             |
| 1964 | JQ703766.1           | JQ703766.1; H28a; Asia_W_Europe; 12; T146C; C186A; A263G      | 16569 | Asia_W_Europe       | H28a       | H           | H            | 12             |
| 1965 | JQ703767.1           | JQ703767.1; K2b1a1; Asia_W; 35; A73G; T146C; A263G            | 16569 | Asia_W              | K2b1a1     | K           | K            | 35             |
| 1966 | JQ703768.1           | JQ703768.1; H65; Asia_W_Europe; 13; A5C; T152C; A263G         | 16569 | Asia_W_Europe       | H65        | H           | H            | 13             |
| 1967 | JQ703769.1           | JQ703769.1; U3a1c; Africa_NE_Asia_W; 31; A73G; T146C; C150T   | 16569 | Africa_NE_Asia_W    | U3a1c      | U           | U3           | 31             |
| 1968 | JQ703770.1           | JQ703770.1; V10b1; Europe_S; 20; T72C; A263G; C309CCCT        | 16571 | Europe_S            | V10b1      | V           | V            | 20             |



**Supplementary Table S3** Human mitochondrial database (hMITO DB v1.0) metadata

| Row  | Name (accession no.) | Description                                                     | Size  | Geo_Region          | Haplogroup | Macro_Haplo | Macro_Haplo2 | Total Variants |
|------|----------------------|-----------------------------------------------------------------|-------|---------------------|------------|-------------|--------------|----------------|
| 1969 | JQ703771.1           | JQ703771.1; X2c1; Asia_W_America_N; 30; A153G; T195C; G225A     | 16570 | Asia_W_America_N    | X2c1       | X           | X            | 30             |
| 1970 | JQ703772.1           | JQ703772.1; T2b6a; Asia_W; 40; A73G; T146C; A263G               | 16570 | Asia_W              | T2b6a      | T           | T            | 40             |
| 1971 | JQ703773.1           | JQ703773.1; L1c4b; Africa_C; 91; A73G; T152C; C182T             | 16571 | Africa_C            | L1c4b      | L1          | L1           | 91             |
| 1972 | JQ703774.1           | JQ703774.1; C1c1b; Asia_NE_America_N_S; 45; A73G; A215G; A249d  | 16567 | Asia_NE_America_N_S | C1c1b      | C           | C            | 45             |
| 1973 | JQ703775.1           | JQ703775.1; K1a3a4; Asia_W; 37; A73G; A263G; C309CCT            | 16572 | Asia_W              | K1a3a4     | K           | K            | 37             |
| 1974 | JQ703776.1           | JQ703776.1; T2a1b1a2; Asia_W; 39; A73G; A263G; C315CC           | 16569 | Asia_W              | T2a1b1a2   | T           | T            | 39             |
| 1975 | JQ703777.1           | JQ703777.1; T2e; Asia_W; 38; A73G; C150T; A263G                 | 16567 | Asia_W              | T2e        | T           | T            | 38             |
| 1976 | JQ703778.1           | JQ703778.1; J1c2b; Asia_W; 33; A73G; G185A; A188G               | 16570 | Asia_W              | J1c2b      | J           | J            | 33             |
| 1977 | JQ703779.1           | JQ703779.1; U8a1a1b1; Asia_W_Europe; 33; A73G; A263G; T282C     | 16570 | Asia_W_Europe       | U8a1a1b1   | U           | U8           | 33             |
| 1978 | JQ703780.1           | JQ703780.1; U5b2b1a2; Asia_W_Europe_C; 37; A73G; C150T; A263G   | 16570 | Asia_W_Europe_C     | U5b2b1a2   | U           | U5           | 37             |
| 1979 | JQ703781.1           | JQ703781.1; H11b1; Asia_W_Europe; 18; T195C; A263G; C309CCT     | 16570 | Asia_W_Europe       | H11b1      | H           | H            | 18             |
| 1980 | JQ703782.1           | JQ703782.1; K1a4a1a2b; Asia_W; 41; A73G; T146C; T195C           | 16569 | Asia_W              | K1a4a1a2b  | K           | K            | 41             |
| 1981 | JQ703783.1           | JQ703783.1; J1c1b; Asia_W; 30; A73G; G185A; G228A               | 16569 | Asia_W              | J1c1b      | J           | J            | 30             |
| 1982 | JQ703784.1           | JQ703784.1; J2b1b; Asia_W; 35; A73G; C150T; T152C               | 16570 | Asia_W              | J2b1b      | J           | J            | 35             |
| 1983 | JQ703785.1           | JQ703785.1; J1c2s1; Asia_W; 33; A73G; C114T; G185A              | 16569 | Asia_W              | J1c2s1     | J           | J            | 33             |
| 1984 | JQ703786.1           | JQ703786.1; J1c3; Asia_W; 27; A73G; A263G; C295T                | 16570 | Asia_W              | J1c3       | J           | J            | 27             |
| 1985 | JQ703787.1           | JQ703787.1; H1c; Asia_W_Europe; 11; A263G; C315CC; T477C        | 16569 | Asia_W_Europe       | H1c        | H           | H            | 11             |
| 1986 | JQ703788.1           | JQ703788.1; H1aj1a; Asia_W_Europe; 16; G207A; A263G; C315CC     | 16569 | Asia_W_Europe       | H1aj1a     | H           | H            | 16             |
| 1987 | JQ703789.1           | JQ703789.1; J1c2o; Asia_W; 32; A73G; G185A; A188G               | 16570 | Asia_W              | J1c2o      | J           | J            | 32             |
| 1988 | JQ703790.1           | JQ703790.1; U5b2b3a1a; Asia_W_Europe_C; 37; A73G; C150T; A263G  | 16569 | Asia_W_Europe_C     | U5b2b3a1a  | U           | U5           | 37             |
| 1989 | JQ703791.1           | JQ703791.1; H5; Asia_W_Europe; 15; T152C; A263G; C309CCT        | 16568 | Asia_W_Europe       | H5         | H           | H            | 15             |
| 1990 | JQ703792.1           | JQ703792.1; J1c3a2; Asia_W; 30; A73G; G228A; A263G              | 16570 | Asia_W              | J1c3a2     | J           | J            | 30             |
| 1991 | JQ703793.1           | JQ703793.1; U1a1a2; Asia_W; 39; A73G; C262T; A263G              | 16569 | Asia_W              | U1a1a2     | U           | U1           | 39             |
| 1992 | JQ703794.1           | JQ703794.1; J1c2; Asia_W; 30; A73G; G185A; A188G                | 16570 | Asia_W              | J1c2       | J           | J            | 30             |
| 1993 | JQ703795.1           | JQ703795.1; H1; Asia_W_Europe; 13; A93G; A263G; C309CCCT        | 16571 | Asia_W_Europe       | H1         | H           | H            | 13             |
| 1994 | JQ703796.1           | JQ703796.1; U5b2a6; Asia_W_Europe_C; 29; A73G; C150T; A263G     | 16569 | Asia_W_Europe_C     | U5b2a6     | U           | U5           | 29             |
| 1995 | JQ703797.1           | JQ703797.1; H3; Asia_W_Europe; 13; C33T; A263G; C309CC          | 16569 | Asia_W_Europe       | H3         | H           | H            | 13             |
| 1996 | JQ703798.1           | JQ703798.1; H+152; Asia_W_Europe; 11; T152C; A263G; C309CCT     | 16570 | Asia_W_Europe       | H+152      | H           | H            | 11             |
| 1997 | JQ703799.1           | JQ703799.1; H5; Asia_W_Europe; 14; C150T; A263G; C309CCT        | 16570 | Asia_W_Europe       | H5         | H           | H            | 14             |
| 1998 | JQ703800.1           | JQ703800.1; H5a3b; Asia_W_Europe; 16; T199C; A263G; C309CCT     | 16570 | Asia_W_Europe       | H5a3b      | H           | H            | 16             |
| 1999 | JQ703801.1           | JQ703801.1; J2a1a1; Asia_W; 40; A73G; C150T; T152C              | 16572 | Asia_W              | J2a1a1     | J           | J            | 40             |
| 2000 | JQ703802.1           | JQ703802.1; J1b1a1; Asia_W; 38; A73G; C242T; A263G              | 16569 | Asia_W              | J1b1a1     | J           | J            | 38             |
| 2001 | JQ703803.1           | JQ703803.1; J1c5a; Asia_W; 36; A73G; G185A; T195C               | 16570 | Asia_W              | J1c5a      | J           | J            | 36             |
| 2002 | JQ703804.1           | JQ703804.1; H61a; Asia_W_Europe; 12; A263G; C315CC; A750G       | 16569 | Asia_W_Europe       | H61a       | H           | H            | 12             |
| 2003 | JQ703805.1           | JQ703805.1; K1a1b1e; Asia_W; 34; A73G; A263G; C315CC            | 16569 | Asia_W              | K1a1b1e    | K           | K            | 34             |
| 2004 | JQ703806.1           | JQ703806.1; T2f1a1; Asia_W; 45; A73G; C150T; T195C              | 16561 | Asia_W              | T2f1a1     | T           | T            | 45             |
| 2005 | JQ703807.1           | JQ703807.1; K1a4a1g; Asia_W; 38; A73G; A263G; C309CCT           | 16570 | Asia_W              | K1a4a1g    | K           | K            | 38             |
| 2006 | JQ703808.1           | JQ703808.1; H13a1a1d; Asia_W_Europe; 20; A263G; C309CCCT; T310C | 16571 | Asia_W_Europe       | H13a1a1d   | H           | H            | 20             |
| 2007 | JQ703809.1           | JQ703809.1; A2I; Asia_NE_America_N; 32; C64T; A73G; T146C       | 16567 | Asia_NE_America_N   | A2I        | A           | A            | 32             |
| 2008 | JQ703810.1           | JQ703810.1; H1c9; Asia_W_Europe; 14; T152C; A263G; C309CCT      | 16570 | Asia_W_Europe       | H1c9       | H           | H            | 14             |
| 2009 | JQ703811.1           | JQ703811.1; H1ag1; Asia_W_Europe; 12; A263G; C315CC; A750G      | 16569 | Asia_W_Europe       | H1ag1      | H           | H            | 12             |

**Supplementary Table S3** Human mitochondrial database (hMITO DB v1.0) metadata

| Row  | Name (accession no.) | Description                                                         | Size  | Geo_Region            | Haplogroup    | Macro_Haplo | Macro_Haplo2 | Total Variants |
|------|----------------------|---------------------------------------------------------------------|-------|-----------------------|---------------|-------------|--------------|----------------|
| 2010 | JQ703812.1           | JQ703812.1; M7c1c3; Asia_E_SE; 41; A73G; T146C; T199C               | 16568 | Asia_E_SE             | M7c1c3        | M           | M7           | 41             |
| 2011 | JQ703813.1           | JQ703813.1; H6a1a4; Asia_W_Europe; 17; T239C; A263G; C309CCT        | 16570 | Asia_W_Europe         | H6a1a4        | H           | H            | 17             |
| 2012 | JQ703814.1           | JQ703814.1; H1a1; Asia_W_Europe; 14; A73G; A263G; C315CC            | 16569 | Asia_W_Europe         | H1a1          | H           | H            | 14             |
| 2013 | JQ703815.1           | JQ703815.1; K1c1f; Asia_W; 37; A73G; T146C; T152C                   | 16569 | Asia_W                | K1c1f         | K           | K            | 37             |
| 2014 | JQ703816.1           | JQ703816.1; H3ap; Asia_W_Europe; 11; A263G; C309CCT; T310C          | 16568 | Asia_W_Europe         | H3ap          | H           | H            | 11             |
| 2015 | JQ703817.1           | JQ703817.1; H1ba; Asia_W_Europe; 13; A263G; C309CCT; T310C          | 16570 | Asia_W_Europe         | H1ba          | H           | H            | 13             |
| 2016 | JQ703818.1           | JQ703818.1; J1c2; Asia_W; 30; A73G; G185A; A188G                    | 16569 | Asia_W                | J1c2          | J           | J            | 30             |
| 2017 | JQ703819.1           | JQ703819.1; H3i1; Asia_W_Europe; 13; T152C; A263G; C315CC           | 16569 | Asia_W_Europe         | H3i1          | H           | H            | 13             |
| 2018 | JQ703820.1           | JQ703820.1; H5a1g2; Asia_W_Europe; 14; A263G; C315CC; C456T         | 16567 | Asia_W_Europe         | H5a1g2        | H           | H            | 14             |
| 2019 | JQ703821.1           | JQ703821.1; H45b; Asia_W_Europe; 11; A263G; C315CC; A750G           | 16569 | Asia_W_Europe         | H45b          | H           | H            | 11             |
| 2020 | JQ703822.1           | JQ703822.1; J1b1a1a; Asia_W; 39; A73G; C242T; A263G                 | 16569 | Asia_W                | J1b1a1a       | J           | J            | 39             |
| 2021 | JQ703823.1           | JQ703823.1; T2c1e; Asia_W; 40; A73G; T146C; A263G                   | 16568 | Asia_W                | T2c1e         | T           | T            | 40             |
| 2022 | JQ703824.1           | JQ703824.1; H5a3b; Asia_W_Europe; 14; A263G; C309CCCT; T310C        | 16571 | Asia_W_Europe         | H5a3b         | H           | H            | 14             |
| 2023 | JQ703825.1           | JQ703825.1; J1c1b1a; Asia_W; 34; A73G; G185A; G228A                 | 16569 | Asia_W                | J1c1b1a       | J           | J            | 34             |
| 2024 | JQ703826.1           | JQ703826.1; A2+(64); Asia_NE_America_N; 36; C64T; A73G; T146C       | 16568 | Asia_NE_America_N     | A2+(64)       | A           | A            | 36             |
| 2025 | JQ703827.1           | JQ703827.1; C1c7; Asia_NE_America_N_S; 47; A73G; T195C; A249d       | 16567 | Asia_NE_America_N_S   | C1c7          | C           | C            | 47             |
| 2026 | JQ703828.1           | JQ703828.1; B2a2; Asia_SE_E_America_N_S; 34; A73G; A263G; C309CCCT  | 16562 | Asia_SE_E_America_N_S | B2a2          | B           | B            | 34             |
| 2027 | JQ703829.1           | JQ703829.1; I2d; Asia_W_SW; 36; A73G; T152C; T199C                  | 16572 | Asia_W_SW             | I2d           | I           | I            | 36             |
| 2028 | JQ703830.1           | JQ703830.1; V7a; Europe_S; 23; T72C; T89C; A93G                     | 16570 | Europe_S              | V7a           | V           | V            | 23             |
| 2029 | JQ703831.1           | JQ703831.1; U5a2c1; Asia_W_Europe_C; 27; A73G; A263G; C315CC        | 16569 | Asia_W_Europe_C       | U5a2c1        | U           | U5           | 27             |
| 2030 | JQ703832.1           | JQ703832.1; A2g; Asia_NE_America_N; 36; C64T; A73G; T146C           | 16568 | Asia_NE_America_N     | A2g           | A           | A            | 36             |
| 2031 | JQ703833.1           | JQ703833.1; A2+(64)+16189; Asia_NE_America_N; 43; C64T; A73G; G143A | 16566 | Asia_NE_America_N     | A2+(64)+16189 | A           | A            | 43             |
| 2032 | JQ703834.1           | JQ703834.1; B2a1a1; Asia_SE_E_America_N_S; 32; A73G; T195C; A263G   | 16561 | Asia_SE_E_America_N_S | B2a1a1        | B           | B            | 32             |
| 2033 | JQ703835.1           | JQ703835.1; I1a1; Asia_W_SW; 42; A73G; T199C; G203A                 | 16572 | Asia_W_SW             | I1a1          | I           | I            | 42             |
| 2034 | JQ703836.1           | JQ703836.1; V3a1; Europe_S; 21; T72C; A189G; A263G                  | 16572 | Europe_S              | V3a1          | V           | V            | 21             |
| 2035 | JQ703837.1           | JQ703837.1; K2a3; Asia_W; 35; A73G; T146C; T152C                    | 16569 | Asia_W                | K2a3          | K           | K            | 35             |
| 2036 | JQ703838.1           | JQ703838.1; H1b1e; Asia_W_Europe; 13; A263G; C315CC; A750G          | 16569 | Asia_W_Europe         | H1b1e         | H           | H            | 13             |
| 2037 | JQ703839.1           | JQ703839.1; H1z; Asia_W_Europe; 17; A263G; C309CCCT; T310C          | 16571 | Asia_W_Europe         | H1z           | H           | H            | 17             |
| 2038 | JQ703840.1           | JQ703840.1; C1c; Asia_NE_America_N_S; 45; A73G; C150T; T152C        | 16567 | Asia_NE_America_N_S   | C1c           | C           | C            | 45             |
| 2039 | JQ703841.1           | JQ703841.1; X2b+226; Asia_W_America_N; 32; A73G; T195C; A200G       | 16570 | Asia_W_America_N      | X2b+226       | X           | X            | 32             |
| 2040 | JQ703842.1           | JQ703842.1; T2b4b; Asia_W; 37; A73G; T152C; A263G                   | 16572 | Asia_W                | T2b4b         | T           | T            | 37             |
| 2041 | JQ703843.1           | JQ703843.1; H3y; Asia_W_Europe; 14; T195C; A263G; C315CC            | 16569 | Asia_W_Europe         | H3y           | H           | H            | 14             |
| 2042 | JQ703844.1           | JQ703844.1; M7c1c3d; Asia_E_SE; 42; A73G; T146C; T199C              | 16568 | Asia_E_SE             | M7c1c3d       | M           | M7           | 42             |
| 2043 | JQ703845.1           | JQ703845.1; H4a1a1a1a1; Asia_W_Europe; 24; A73G; T152C; A263G       | 16567 | Asia_W_Europe         | H4a1a1a1a1    | H           | H            | 24             |
| 2044 | JQ703846.1           | JQ703846.1; H5a6; Asia_W_Europe; 14; T152C; A263G; C315CC           | 16569 | Asia_W_Europe         | H5a6          | H           | H            | 14             |
| 2045 | JQ703847.1           | JQ703847.1; H48; Asia_W_Europe; 11; A263G; C309CCT; T310C           | 16570 | Asia_W_Europe         | H48           | H           | H            | 11             |
| 2046 | JQ703848.1           | JQ703848.1; H1b1+16362; Asia_W_Europe; 13; A263G; C315CC; CA522d    | 16567 | Asia_W_Europe         | H1b1+16362    | H           | H            | 13             |
| 2047 | JQ703849.1           | JQ703849.1; U5b1a; Asia_W_Europe_C; 30; A73G; C150T; T204C          | 16570 | Asia_W_Europe_C       | U5b1a         | U           | U5           | 30             |
| 2048 | JQ703850.1           | JQ703850.1; I2; Asia_W_SW; 37; A73G; T152C; T199C                   | 16572 | Asia_W_SW             | I2            | I           | I            | 37             |
| 2049 | JQ703851.1           | JQ703851.1; B2o; Asia_SE_E_America_N_S; 34; A73G; T159C; A263G      | 16560 | Asia_SE_E_America_N_S | B2o           | B           | B            | 34             |
| 2050 | JQ703852.1           | JQ703852.1; B2a4; Asia_SE_E_America_N_S; 33; A73G; A263G; C315CC    | 16560 | Asia_SE_E_America_N_S | B2a4          | B           | B            | 33             |

**Supplementary Table S3** Human mitochondrial database (hMITO DB v1.0) metadata

| Row  | Name (accession no.) | Description                                                       | Size  | Geo_Region            | Haplogroup | Macro_Haplo | Macro_Haplo2 | Total Variants |
|------|----------------------|-------------------------------------------------------------------|-------|-----------------------|------------|-------------|--------------|----------------|
| 2051 | JQ703853.1           | JQ703853.1; C1b1; Asia_NE_America_N_S; 47; A73G; A249d; A263G     | 16565 | Asia_NE_America_N_S   | C1b1       | C           | C            | 47             |
| 2052 | JQ703854.1           | JQ703854.1; H2a1; Asia_W_Europe; 10; T152C; A263G; C309CCT        | 16570 | Asia_W_Europe         | H2a1       | H           | H            | 10             |
| 2053 | JQ703855.1           | JQ703855.1; K1a1b1a; Asia_W; 40; A73G; C114T; A263G               | 16569 | Asia_W                | K1a1b1a    | K           | K            | 40             |
| 2054 | JQ703856.1           | JQ703856.1; H1j2a; Asia_W_Europe; 17; T152C; A263G; C309CCCT      | 16571 | Asia_W_Europe         | H1j2a      | H           | H            | 17             |
| 2055 | JQ703857.1           | JQ703857.1; H; Asia_W_Europe; 14; T146C; A263G; C315CC            | 16571 | Asia_W_Europe         | H          | H           | H            | 14             |
| 2056 | JQ703858.1           | JQ703858.1; H13a1a; Asia_W_Europe; 16; A263G; C309CCCT; T310C     | 16571 | Asia_W_Europe         | H13a1a     | H           | H            | 16             |
| 2057 | JQ703859.1           | JQ703859.1; K2b1a1; Asia_W; 35; A73G; T146C; A263G                | 16569 | Asia_W                | K2b1a1     | K           | K            | 35             |
| 2058 | JQ703860.1           | JQ703860.1; K1c1c; Asia_W; 34; A73G; T146C; T152C                 | 16568 | Asia_W                | K1c1c      | K           | K            | 34             |
| 2059 | JQ703861.1           | JQ703861.1; J1c7; Asia_W; 32; A73G; G185A; G228A                  | 16569 | Asia_W                | J1c7       | J           | J            | 32             |
| 2060 | JQ703862.1           | JQ703862.1; I3d1; Asia_W_SW; 41; A73G; T152C; A183G               | 16579 | Asia_W_SW             | I3d1       | I           | I            | 41             |
| 2061 | JQ703863.1           | JQ703863.1; H13a1a; Asia_W_Europe; 14; A263G; C315CC; A750G       | 16569 | Asia_W_Europe         | H13a1a     | H           | H            | 14             |
| 2062 | JQ703864.1           | JQ703864.1; H2a2a1b; Asia_W_Europe; 2; G5046A; A9299G;            | 16568 | Asia_W_Europe         | H2a2a1b    | H           | H            | 2              |
| 2063 | JQ703865.1           | JQ703865.1; D1n; Asia_E_America_N_S; 36; A73G; A263G; C309CCT     | 16570 | Asia_E_America_N_S    | D1n        | D           | D            | 36             |
| 2064 | JQ703866.1           | JQ703866.1; U5a1a1+152; Asia_W_Europe_C; 30; A73G; T152C; A263G   | 16569 | Asia_W_Europe_C       | U5a1a1+152 | U           | U5           | 30             |
| 2065 | JQ703867.1           | JQ703867.1; V1a; Europe_S; 17; T72C; A263G; C315CC                | 16569 | Europe_S              | V1a        | V           | V            | 17             |
| 2066 | JQ703868.1           | JQ703868.1; T2a1b1a1a1; Asia_W; 40; A73G; A263G; C315CC           | 16569 | Asia_W                | T2a1b1a1a1 | T           | T            | 40             |
| 2067 | JQ703869.1           | JQ703869.1; H1a1; Asia_W_Europe; 13; A73G; A263G; C315CC          | 16569 | Asia_W_Europe         | H1a1       | H           | H            | 13             |
| 2068 | JQ703870.1           | JQ703870.1; J1c2; Asia_W; 32; A73G; G185A; A188G                  | 16568 | Asia_W                | J1c2       | J           | J            | 32             |
| 2069 | JQ703871.1           | JQ703871.1; H14a2b; Asia_W_Europe; 14; A263G; C315CC; A750G       | 16569 | Asia_W_Europe         | H14a2b     | H           | H            | 14             |
| 2070 | JQ703872.1           | JQ703872.1; B2g1; Asia_SE_E_America_N_S; 39; A73G; C114G; A263G   | 16563 | Asia_SE_E_America_N_S | B2g1       | B           | B            | 39             |
| 2071 | JQ703873.1           | JQ703873.1; A2i; Asia_NE_America_N; 43; C64T; A73G; G94A          | 16570 | Asia_NE_America_N     | A2i        | A           | A            | 43             |
| 2072 | JQ703874.1           | JQ703874.1; B4g1; Asia_SE_E_America_N_S; 31; A73G; T152C; A263G   | 16560 | Asia_SE_E_America_N_S | B4g1       | B           | B            | 31             |
| 2073 | JQ703875.1           | JQ703875.1; A2w1; Asia_NE_America_N; 38; C64T; A73G; T146C        | 16570 | Asia_NE_America_N     | A2w1       | A           | A            | 38             |
| 2074 | JQ703876.1           | JQ703876.1; K1b2b; Asia_W; 38; A73G; T146C; T195C                 | 16572 | Asia_W                | K1b2b      | K           | K            | 38             |
| 2075 | JQ703877.1           | JQ703877.1; H10e; Asia_W_Europe; 11; A263G; C309CCT; T310C        | 16570 | Asia_W_Europe         | H10e       | H           | H            | 11             |
| 2076 | JQ703878.1           | JQ703878.1; H13a2c1; Asia_W_Europe; 23; T152C; A189G; A193G       | 16571 | Asia_W_Europe         | H13a2c1    | H           | H            | 23             |
| 2077 | JQ703879.1           | JQ703879.1; H1u1; Asia_W_Europe; 12; A263G; C315CC; A750G         | 16569 | Asia_W_Europe         | H1u1       | H           | H            | 12             |
| 2078 | JQ703880.1           | JQ703880.1; K1a4a1a2b; Asia_W; 41; A73G; T146C; A263G             | 16572 | Asia_W                | K1a4a1a2b  | K           | K            | 41             |
| 2079 | JQ703881.1           | JQ703881.1; H2a1n; Asia_W_Europe; 9; T146C; A263G; C309CCT        | 16570 | Asia_W_Europe         | H2a1n      | H           | H            | 9              |
| 2080 | JQ703882.1           | JQ703882.1; J1c2c; Asia_W; 34; A73G; T146C; G185A                 | 16569 | Asia_W                | J1c2c      | J           | J            | 34             |
| 2081 | JQ703883.1           | JQ703883.1; I3c; Asia_W_SW; 37; A73G; T152C; T199C                | 16576 | Asia_W_SW             | I3c        | I           | I            | 37             |
| 2082 | JQ703884.1           | JQ703884.1; B4b1a2; Asia_SE_E_America_N_S; 31; A73G; G207A; A263G | 16560 | Asia_SE_E_America_N_S | B4b1a2     | B           | B            | 31             |
| 2083 | JQ703885.1           | JQ703885.1; C5c1a; Asia_NE_America_N_S; 48; A73G; T152C; A249d    | 16569 | Asia_NE_America_N_S   | C5c1a      | C           | C            | 48             |
| 2084 | JQ703886.1           | JQ703886.1; U4b1b1a; Asia_N_Europe_N; 34; A73G; T146C; T152C      | 16570 | Asia_N_Europe_N       | U4b1b1a    | U           | U4           | 34             |
| 2085 | JQ703887.1           | JQ703887.1; U4a1a2; Asia_N_Europe_N; 34; A73G; T152C; T195C       | 16573 | Asia_N_Europe_N       | U4a1a2     | U           | U4           | 34             |
| 2086 | JQ703888.1           | JQ703888.1; H1ba; Asia_W_Europe; 14; A263G; C309CCT; T310C        | 16570 | Asia_W_Europe         | H1ba       | H           | H            | 14             |
| 2087 | JQ703889.1           | JQ703889.1; H1c2; Asia_W_Europe; 12; A263G; C315CC; T477C         | 16569 | Asia_W_Europe         | H1c2       | H           | H            | 12             |
| 2088 | JQ703890.1           | JQ703890.1; T2a1a; Asia_W; 35; A73G; A263G; C315CC                | 16569 | Asia_W                | T2a1a      | T           | T            | 35             |
| 2089 | JQ703891.1           | JQ703891.1; K1a24; Asia_W; 33; A73G; C150T; A263G                 | 16569 | Asia_W                | K1a24      | K           | K            | 33             |
| 2090 | JQ703892.1           | JQ703892.1; H4a1a1a; Asia_W_Europe; 20; A73G; A263G; C309CCT      | 16568 | Asia_W_Europe         | H4a1a1a    | H           | H            | 20             |
| 2091 | JQ703893.1           | JQ703893.1; H1; Asia_W_Europe; 10; A93G; A263G; C315CC            | 16569 | Asia_W_Europe         | H1         | H           | H            | 10             |

**Supplementary Table S3** Human mitochondrial database (hMITO DB v1.0) metadata

| Row  | Name (accession no.) | Description                                                     | Size  | Geo_Region       | Haplogroup | Macro_Haplo | Macro_Haplo2 | Total Variants |
|------|----------------------|-----------------------------------------------------------------|-------|------------------|------------|-------------|--------------|----------------|
| 2092 | JQ703894.1           | JQ703894.1; T1a1c; Asia_W; 40; A73G; T152C; T195C               | 16570 | Asia_W           | T1a1c      | T           | T            | 40             |
| 2093 | JQ703895.1           | JQ703895.1; J1c3e1; Asia_W; 35; A73G; G185A; T195C              | 16570 | Asia_W           | J1c3e1     | J           | J            | 35             |
| 2094 | JQ703896.1           | JQ703896.1; U5b2a1a1; Asia_W_Europe_C; 32; A73G; C150T; A263G   | 16570 | Asia_W_Europe_C  | U5b2a1a1   | U           | U5           | 32             |
| 2095 | JQ703897.1           | JQ703897.1; H4a1; Asia_W_Europe; 21; A93G; C194T; A263G         | 16567 | Asia_W_Europe    | H4a1       | H           | H            | 21             |
| 2096 | JQ703898.1           | JQ703898.1; H24a1; Asia_W_Europe; 12; A263G; C315CCC; A750G     | 16570 | Asia_W_Europe    | H24a1      | H           | H            | 12             |
| 2097 | JQ703899.1           | JQ703899.1; U5b2a1a1; Asia_W_Europe_C; 30; A73G; C150T; A263G   | 16569 | Asia_W_Europe_C  | U5b2a1a1   | U           | U5           | 30             |
| 2098 | JQ703900.1           | JQ703900.1; U4c1; Asia_N_Europe_N; 36; A73G; T195C; A263G       | 16571 | Asia_N_Europe_N  | U4c1       | U           | U4           | 36             |
| 2099 | JQ703901.1           | JQ703901.1; H1a1a; Asia_W_Europe; 17; A73G; T152C; A263G        | 16569 | Asia_W_Europe    | H1a1a      | H           | H            | 17             |
| 2100 | JQ703902.1           | JQ703902.1; U6a5; Asia_SW_Africa_N; 30; A73G; A263G; C309CCT    | 16570 | Asia_SW_Africa_N | U6a5       | U           | U6           | 30             |
| 2101 | JQ703903.1           | JQ703903.1; U4a1; Asia_N_Europe_N; 32; A73G; T152C; T195C       | 16571 | Asia_N_Europe_N  | U4a1       | U           | U4           | 32             |
| 2102 | JQ703904.1           | JQ703904.1; U5b2c2; Asia_W_Europe_C; 32; A73G; C150T; A263G     | 16571 | Asia_W_Europe_C  | U5b2c2     | U           | U5           | 32             |
| 2103 | JQ703905.1           | JQ703905.1; U5b2b1a1; Asia_W_Europe_C; 32; A73G; C150T; A263G   | 16569 | Asia_W_Europe_C  | U5b2b1a1   | U           | U5           | 32             |
| 2104 | JQ703906.1           | JQ703906.1; U5a1a1a; Asia_W_Europe_C; 30; A73G; T152C; A263G    | 16570 | Asia_W_Europe_C  | U5a1a1a    | U           | U5           | 30             |
| 2105 | JQ703907.1           | JQ703907.1; H1bb; Asia_W_Europe; 14; T152C; A263G; C309CCT      | 16572 | Asia_W_Europe    | H1bb       | H           | H            | 14             |
| 2106 | JQ703908.1           | JQ703908.1; X2d1; Asia_W_America_N; 33; A73G; T195C; T204C      | 16569 | Asia_W_America_N | X2d1       | X           | X            | 33             |
| 2107 | JQ703909.1           | JQ703909.1; H65; Asia_W_Europe; 13; A263G; C309CCT; T310C       | 16570 | Asia_W_Europe    | H65        | H           | H            | 13             |
| 2108 | JQ703910.1           | JQ703910.1; I2a2; Asia_W_SW; 37; A73G; T152C; T199C             | 16574 | Asia_W_SW        | I2a2       | I           | I            | 37             |
| 2109 | JQ703911.1           | JQ703911.1; U3b1; Africa_NE_Asia_W; 30; A73G; C150T; A263G      | 16569 | Africa_NE_Asia_W | U3b1       | U           | U3           | 30             |
| 2110 | JQ703912.1           | JQ703912.1; U4b1a1a; Asia_N_Europe_N; 34; A73G; A189G; T195C    | 16570 | Asia_N_Europe_N  | U4b1a1a    | U           | U4           | 34             |
| 2111 | JQ703913.1           | JQ703913.1; U7a5; Asia_W; 37; A73G; C151T; T152C                | 16569 | Asia_W           | U7a5       | U           | U7           | 37             |
| 2112 | JQ703914.1           | JQ703914.1; U5b2b4a; Asia_W_Europe_C; 34; A73G; C150T; G185A    | 16572 | Asia_W_Europe_C  | U5b2b4a    | U           | U5           | 34             |
| 2113 | JQ703915.1           | JQ703915.1; J1d5; Asia_W; 36; A73G; T146C; T152C                | 16569 | Asia_W           | J1d5       | J           | J            | 36             |
| 2114 | JQ703916.1           | JQ703916.1; J1c4b; Asia_W; 30; A73G; G185A; G228A               | 16569 | Asia_W           | J1c4b      | J           | J            | 30             |
| 2115 | JQ703917.1           | JQ703917.1; U2e1b1; Asia_S_W_Europe; 41; A73G; T152C; T217C     | 16571 | Asia_S_W_Europe  | U2e1b1     | U           | U2           | 41             |
| 2116 | JQ703918.1           | JQ703918.1; V1a1; Europe_S; 16; A263G; C309CCT; T310C           | 16570 | Europe_S         | V1a1       | V           | V            | 16             |
| 2117 | JQ703919.1           | JQ703919.1; J1c6; Asia_W; 30; A73G; G185A; G228A                | 16569 | Asia_W           | J1c6       | J           | J            | 30             |
| 2118 | JQ703920.1           | JQ703920.1; H49a; Asia_W_Europe; 15; T195C; A263G; C309CCT      | 16574 | Asia_W_Europe    | H49a       | H           | H            | 15             |
| 2119 | JQ703921.1           | JQ703921.1; H5b1; Asia_W_Europe; 14; T146C; T195C; A263G        | 16570 | Asia_W_Europe    | H5b1       | H           | H            | 14             |
| 2120 | JQ703922.1           | JQ703922.1; H1; Asia_W_Europe; 12; T146C; A263G; C315CC         | 16569 | Asia_W_Europe    | H1         | H           | H            | 12             |
| 2121 | JQ703923.1           | JQ703923.1; H1ay; Asia_W_Europe; 17; T146C; A263G; C315CC       | 16568 | Asia_W_Europe    | H1ay       | H           | H            | 17             |
| 2122 | JQ703924.1           | JQ703924.1; V15a; Europe_S; 17; T72C; A263G; C309CCCT           | 16571 | Europe_S         | V15a       | V           | V            | 17             |
| 2123 | JQ703925.1           | JQ703925.1; H1a; Asia_W_Europe; 14; A73G; T152C; A263G          | 16570 | Asia_W_Europe    | H1a        | H           | H            | 14             |
| 2124 | JQ703926.1           | JQ703926.1; U5a1a2a1; Asia_W_Europe_C; 32; A73G; A263G; C309CCT | 16571 | Asia_W_Europe_C  | U5a1a2a1   | U           | U5           | 32             |
| 2125 | JQ703927.1           | JQ703927.1; U5a1b; Asia_W_Europe_C; 26; A73G; A263G; C315CC     | 16569 | Asia_W_Europe_C  | U5a1b      | U           | U5           | 26             |
| 2126 | JQ703928.1           | JQ703928.1; U5a1b1a2; Asia_W_Europe_C; 34; A73G; A263G; C315CC  | 16569 | Asia_W_Europe_C  | U5a1b1a2   | U           | U5           | 34             |
| 2127 | JQ703929.1           | JQ703929.1; U4a1a; Asia_N_Europe_N; 36; A73G; T152C; T195C      | 16571 | Asia_N_Europe_N  | U4a1a      | U           | U4           | 36             |
| 2128 | JQ703930.1           | JQ703930.1; U1a1d; Asia_W; 38; A73G; A263G; C285T               | 16571 | Asia_W           | U1a1d      | U           | U1           | 38             |
| 2129 | JQ703931.1           | JQ703931.1; N1a1a1a2; Africa_NE_Asia_W; 41; A73G; T152C; A189G  | 16571 | Africa_NE_Asia_W | N1a1a1a2   | N           | N1           | 41             |
| 2130 | JQ703932.1           | JQ703932.1; J1c7a; Asia_W; 34; A73G; G185A; G228A               | 16570 | Asia_W           | J1c7a      | J           | J            | 34             |
| 2131 | JQ703933.1           | JQ703933.1; T2b; Asia_W; 36; A73G; A263G; C315CC                | 16569 | Asia_W           | T2b        | T           | T            | 36             |
| 2132 | JQ703934.1           | JQ703934.1; U5b1c2; Asia_W_Europe_C; 30; A73G; C150T; A263G     | 16569 | Asia_W_Europe_C  | U5b1c2     | U           | U5           | 30             |

**Supplementary Table S3** Human mitochondrial database (hMITO DB v1.0) metadata

| Row  | Name (accession no.) | Description                                                        | Size  | Geo_Region         | Haplogroup    | Macro_Haplo | Macro_Haplo2 | Total Variants |
|------|----------------------|--------------------------------------------------------------------|-------|--------------------|---------------|-------------|--------------|----------------|
| 2133 | JQ703935.1           | JQ703935.1; H+195; Asia_W_Europe; 14; T195C; A263G; C309CCT        | 16570 | Asia_W_Europe      | H+195         | H           | H            | 14             |
| 2134 | JQ703936.1           | JQ703936.1; U5a2a1; Asia_W_Europe_C; 32; A73G; A263G; C309CCT      | 16570 | Asia_W_Europe_C    | U5a2a1        | U           | U5           | 32             |
| 2135 | JQ703937.1           | JQ703937.1; U5a1a1b; Asia_W_Europe_C; 30; A73G; T152C; A263G       | 16569 | Asia_W_Europe_C    | U5a1a1b       | U           | U5           | 30             |
| 2136 | JQ703938.1           | JQ703938.1; H1ag1a; Asia_W_Europe; 14; A263G; C309CCT; T310C       | 16570 | Asia_W_Europe      | H1ag1a        | H           | H            | 14             |
| 2137 | JQ703939.1           | JQ703939.1; H4a2; Asia_W_Europe; 17; A263G; C309CCT; T310C         | 16568 | Asia_W_Europe      | H4a2          | H           | H            | 17             |
| 2138 | JQ703940.1           | JQ703940.1; H31b; Asia_W_Europe; 13; T146C; T195C; A263G           | 16569 | Asia_W_Europe      | H31b          | H           | H            | 13             |
| 2139 | JQ703941.1           | JQ703941.1; H1b1b; Asia_W_Europe; 20; A263G; C309CCCT; T310C       | 16569 | Asia_W_Europe      | H1b1b         | H           | H            | 20             |
| 2140 | JQ703942.1           | JQ703942.1; U5b2a1a1b; Asia_W_Europe_C; 32; A73G; C150T; A249d     | 16569 | Asia_W_Europe_C    | U5b2a1a1b     | U           | U5           | 32             |
| 2141 | JQ703943.1           | JQ703943.1; H3v+16093; Asia_W_Europe; 17; A263G; C309CCT; T310C    | 16570 | Asia_W_Europe      | H3v+16093     | H           | H            | 17             |
| 2142 | JQ703944.1           | JQ703944.1; U5b1c2a; Asia_W_Europe_C; 34; A73G; C150T; A263G       | 16571 | Asia_W_Europe_C    | U5b1c2a       | U           | U5           | 34             |
| 2143 | JQ703945.1           | JQ703945.1; U5a1b1; Asia_W_Europe_C; 29; A73G; A263G; C315CC       | 16569 | Asia_W_Europe_C    | U5a1b1        | U           | U5           | 29             |
| 2144 | JQ703946.1           | JQ703946.1; U5b2a2a1; Asia_W_Europe_C; 32; A73G; C150T; A263G      | 16569 | Asia_W_Europe_C    | U5b2a2a1      | U           | U5           | 32             |
| 2145 | JQ703947.1           | JQ703947.1; U4a1; Asia_N_Europe_N; 31; A73G; T152C; T195C          | 16573 | Asia_N_Europe_N    | U4a1          | U           | U4           | 31             |
| 2146 | JQ703948.1           | JQ703948.1; H1g2; Asia_W_Europe; 14; A73G; A263G; C315CC           | 16569 | Asia_W_Europe      | H1g2          | H           | H            | 14             |
| 2147 | JQ703949.1           | JQ703949.1; H11a5; Asia_W_Europe; 16; T195C; A263G; C315CC         | 16569 | Asia_W_Europe      | H11a5         | H           | H            | 16             |
| 2148 | JQ703950.1           | JQ703950.1; H28a; Asia_W_Europe; 15; T42TG; C182T; C186A           | 16571 | Asia_W_Europe      | H28a          | H           | H            | 15             |
| 2149 | JQ703951.1           | JQ703951.1; H7a1c; Asia_W_Europe; 16; A263G; C315CC; A750G         | 16569 | Asia_W_Europe      | H7a1c         | H           | H            | 16             |
| 2150 | JQ703952.1           | JQ703952.1; V3c; Europe_S; 18; T72C; A263G; C309CCT                | 16570 | Europe_S           | V3c           | V           | V            | 18             |
| 2151 | JQ703953.1           | JQ703953.1; T2b; Asia_W; 33; A73G; C315CC; G709A                   | 16569 | Asia_W             | T2b           | T           | T            | 33             |
| 2152 | JQ703954.1           | JQ703954.1; H2a1c; Asia_W_Europe; 11; T152C; A263G; C309CCT        | 16570 | Asia_W_Europe      | H2a1c         | H           | H            | 11             |
| 2153 | JQ703955.1           | JQ703955.1; J1c2a2; Asia_W; 34; A73G; G185A; A188G                 | 16570 | Asia_W             | J1c2a2        | J           | J            | 34             |
| 2154 | JQ703956.1           | JQ703956.1; H1c1; Asia_W_Europe; 13; C151T; A263G; C315CC          | 16569 | Asia_W_Europe      | H1c1          | H           | H            | 13             |
| 2155 | JQ703957.1           | JQ703957.1; U2e1a1; Asia_S_W_Europe; 41; A73G; T152C; T217C        | 16569 | Asia_S_W_Europe    | U2e1a1        | U           | U2           | 41             |
| 2156 | JQ703958.1           | JQ703958.1; U5b1b1a; Asia_W_Europe_C; 30; A73G; C150T; A263G       | 16570 | Asia_W_Europe_C    | U5b1b1a       | U           | U5           | 30             |
| 2157 | JQ703959.1           | JQ703959.1; U5b1b1+@16192; Asia_W_Europe_C; 30; A73G; C150T; A263G | 16569 | Asia_W_Europe_C    | U5b1b1+@16192 | U           | U5           | 30             |
| 2158 | JQ703960.1           | JQ703960.1; L2a1f; Africa_W_C; 54; A73G; T146C; T152C              | 16570 | Africa_W_C         | L2a1f         | L2          | L2           | 54             |
| 2159 | JQ703961.1           | JQ703961.1; H; Asia_W_Europe; 13; A93G; A263G; C309CCT             | 16570 | Asia_W_Europe      | H             | H           | H            | 13             |
| 2160 | JQ703962.1           | JQ703962.1; U5a2e; Asia_W_Europe_C; 33; A73G; C151T; T152C         | 16571 | Asia_W_Europe_C    | U5a2e         | U           | U5           | 33             |
| 2161 | JQ703963.1           | JQ703963.1; U5a1b1a; Asia_W_Europe_C; 27; A73G; A263G; C315CC      | 16569 | Asia_W_Europe_C    | U5a1b1a       | U           | U5           | 27             |
| 2162 | JQ703964.1           | JQ703964.1; U5b2a1a; Asia_W_Europe_C; 32; A73G; C150T; A263G       | 16560 | Asia_W_Europe_C    | U5b2a1a       | U           | U5           | 32             |
| 2163 | JQ703965.1           | JQ703965.1; U5a1a1; Asia_W_Europe_C; 32; A73G; A263G; C309CCT      | 16570 | Asia_W_Europe_C    | U5a1a1        | U           | U5           | 32             |
| 2164 | JQ703966.1           | JQ703966.1; Z1a1a; Asia_C_E; 46; A73G; C151T; T152C                | 16570 | Asia_C_E           | Z1a1a         | Z           | Z            | 46             |
| 2165 | JQ703967.1           | JQ703967.1; H1; Asia_W_Europe; 12; A263G; C309CCCT; T310C          | 16569 | Asia_W_Europe      | H1            | H           | H            | 12             |
| 2166 | JQ703968.1           | JQ703968.1; U2e2a1a; Asia_S_W_Europe; 41; A73G; T152C; T217C       | 16570 | Asia_S_W_Europe    | U2e2a1a       | U           | U2           | 41             |
| 2167 | JQ703969.1           | JQ703969.1; K1b2a1; Asia_W; 36; A73G; T146C; T195C                 | 16570 | Asia_W             | K1b2a1        | K           | K            | 36             |
| 2168 | JQ703970.1           | JQ703970.1; W1h1; Asia_W; 35; A73G; T152C; A189G                   | 16569 | Asia_W             | W1h1          | W           | W            | 35             |
| 2169 | JQ703971.1           | JQ703971.1; U5b3b2; Asia_W_Europe_C; 31; A73G; C150T; G228A        | 16570 | Asia_W_Europe_C    | U5b3b2        | U           | U5           | 31             |
| 2170 | JQ703972.1           | JQ703972.1; H24a; Asia_W_Europe; 12; A263G; C315CC; A750G          | 16569 | Asia_W_Europe      | H24a          | H           | H            | 12             |
| 2171 | JQ703973.1           | JQ703973.1; V17; Europe_S; 18; T72C; A263G; C309CCT                | 16570 | Europe_S           | V17           | V           | V            | 18             |
| 2172 | JQ703974.1           | JQ703974.1; H1at1a; Asia_W_Europe; 13; A263G; C315CC; A750G        | 16569 | Asia_W_Europe      | H1at1a        | H           | H            | 13             |
| 2173 | JQ703975.1           | JQ703975.1; D1; Asia_E_America_N_S; 41; A73G; C150T; A263G         | 16569 | Asia_E_America_N_S | D1            | D           | D            | 41             |

**Supplementary Table S3** Human mitochondrial database (hMITO DB v1.0) metadata

| Row  | Name (accession no.) | Description                                                   | Size  | Geo_Region        | Haplogroup | Macro_Haplo | Macro_Haplo2 | Total Variants |
|------|----------------------|---------------------------------------------------------------|-------|-------------------|------------|-------------|--------------|----------------|
| 2174 | JQ703976.1           | JQ703976.1; A2ak; Asia_NE_America_N; 40; A73G; T146C; A153G   | 16568 | Asia_NE_America_N | A2ak       | A           | A            | 40             |
| 2175 | JQ703977.1           | JQ703977.1; U4a1a3; Asia_N_Europe_N; 35; A73G; T152C; T195C   | 16570 | Asia_N_Europe_N   | U4a1a3     | U           | U4           | 35             |
| 2176 | JQ703978.1           | JQ703978.1; U7a5; Asia_W; 38; A73G; C151T; T152C              | 16570 | Asia_W            | U7a5       | U           | U7           | 38             |
| 2177 | JQ703979.1           | JQ703979.1; U5a2c1; Asia_W_Europe_C; 24; A73G; A263G; C315CC  | 16569 | Asia_W_Europe_C   | U5a2c1     | U           | U5           | 24             |
| 2178 | JQ703980.1           | JQ703980.1; U5b2c2b; Asia_W_Europe_C; 37; A73G; C150T; A263G  | 16571 | Asia_W_Europe_C   | U5b2c2b    | U           | U5           | 37             |
| 2179 | JQ703981.1           | JQ703981.1; HV0f; Asia_W; 13; T195C; A263G; C315CC            | 16569 | Asia_W            | HV0f       | HV          | HV           | 13             |
| 2180 | JQ703982.1           | JQ703982.1; H24a; Asia_W_Europe; 12; T236C; A263G; C309CCT    | 16570 | Asia_W_Europe     | H24a       | H           | H            | 12             |
| 2181 | JQ703983.1           | JQ703983.1; U5b1c2; Asia_W_Europe_C; 32; A73G; C150T; A263G   | 16571 | Asia_W_Europe_C   | U5b1c2     | U           | U5           | 32             |
| 2182 | JQ703984.1           | JQ703984.1; U5b2a1a1; Asia_W_Europe_C; 29; A73G; C150T; A263G | 16569 | Asia_W_Europe_C   | U5b2a1a1   | U           | U5           | 29             |
| 2183 | JQ703985.1           | JQ703985.1; V8; Europe_S; 17; T72C; A263G; C309CCT            | 16570 | Europe_S          | V8         | V           | V            | 17             |
| 2184 | JQ703986.1           | JQ703986.1; L3b3; Africa_E; 42; A73G; G185A; A189G            | 16566 | Africa_E          | L3b3       | L3          | L3           | 42             |
| 2185 | JQ703987.1           | JQ703987.1; U5a2b; Asia_W_Europe_C; 27; A73G; A263G; C309CCT  | 16572 | Asia_W_Europe_C   | U5a2b      | U           | U5           | 27             |
| 2186 | JQ703988.1           | JQ703988.1; U5a2a1d; Asia_W_Europe_C; 31; A73G; A263G; C315CC | 16571 | Asia_W_Europe_C   | U5a2a1d    | U           | U5           | 31             |
| 2187 | JQ703989.1           | JQ703989.1; V1a; Europe_S; 17; A263G; C309CCT; T310C          | 16570 | Europe_S          | V1a        | V           | V            | 17             |
| 2188 | JQ703990.1           | JQ703990.1; U3a1a; Africa_NE_Asia_W; 32; A73G; C150T; A263G   | 16570 | Africa_NE_Asia_W  | U3a1a      | U           | U3           | 32             |
| 2189 | JQ703991.1           | JQ703991.1; V15a; Europe_S; 16; T72C; A263G; C309CCT          | 16570 | Europe_S          | V15a       | V           | V            | 16             |
| 2190 | JQ703992.1           | JQ703992.1; V1a1; Europe_S; 18; T72C; A263G; C309CCT          | 16570 | Europe_S          | V1a1       | V           | V            | 18             |
| 2191 | JQ703993.1           | JQ703993.1; V7; Europe_S; 17; A93G; A263G; C309CCT            | 16570 | Europe_S          | V7         | V           | V            | 17             |
| 2192 | JQ703994.1           | JQ703994.1; U2e1; Asia_S_W_Europe; 40; A73G; T152C; T217C     | 16571 | Asia_S_W_Europe   | U2e1       | U           | U2           | 40             |
| 2193 | JQ703995.1           | JQ703995.1; H1m1; Asia_W_Europe; 15; T146C; A263G; C309CCCT   | 16571 | Asia_W_Europe     | H1m1       | H           | H            | 15             |
| 2194 | JQ703996.1           | JQ703996.1; V; Europe_S; 16; T72C; A263G; C309CCT             | 16570 | Europe_S          | V          | V           | V            | 16             |
| 2195 | JQ703997.1           | JQ703997.1; T2f; Asia_W; 32; A73G; A263G; C315CC              | 16560 | Asia_W            | T2f        | T           | T            | 32             |
| 2196 | JQ703998.1           | JQ703998.1; H1c19; Asia_W_Europe; 12; A263G; C315CC; T477C    | 16569 | Asia_W_Europe     | H1c19      | H           | H            | 12             |
| 2197 | JQ703999.1           | JQ703999.1; U5b2a2b1; Asia_W_Europe_C; 33; A73G; C150T; A263G | 16569 | Asia_W_Europe_C   | U5b2a2b1   | U           | U5           | 33             |
| 2198 | JQ704000.1           | JQ704000.1; U2e2a1a1; Asia_S_W_Europe; 45; A73G; T146C; T152C | 16572 | Asia_S_W_Europe   | U2e2a1a1   | U           | U2           | 45             |
| 2199 | JQ704001.1           | JQ704001.1; U5a1d2a; Asia_W_Europe_C; 34; A73G; T195C; A263G  | 16572 | Asia_W_Europe_C   | U5a1d2a    | U           | U5           | 34             |
| 2200 | JQ704002.1           | JQ704002.1; H1; Asia_W_Europe; 12; A263G; C309CCT; T310C      | 16570 | Asia_W_Europe     | H1         | H           | H            | 12             |
| 2201 | JQ704003.1           | JQ704003.1; H1b1; Asia_W_Europe; 16; A263G; C309CCCT; T310C   | 16569 | Asia_W_Europe     | H1b1       | H           | H            | 16             |
| 2202 | JQ704004.1           | JQ704004.1; K2b1a1; Asia_W; 35; A73G; T146C; A263G            | 16569 | Asia_W            | K2b1a1     | K           | K            | 35             |
| 2203 | JQ704005.1           | JQ704005.1; V; Europe_S; 15; T72C; A263G; C309CCT             | 16570 | Europe_S          | V          | V           | V            | 15             |
| 2204 | JQ704006.1           | JQ704006.1; H3a1; Asia_W_Europe; 14; T152C; A263G; C309CCT    | 16570 | Asia_W_Europe     | H3a1       | H           | H            | 14             |
| 2205 | JQ704007.1           | JQ704007.1; V3c; Europe_S; 19; T72C; A73G; A263G              | 16570 | Europe_S          | V3c        | V           | V            | 19             |
| 2206 | JQ704008.1           | JQ704008.1; U6b2; Asia_SW_Africa_N; 26; A73G; A263G; C315CC   | 16567 | Asia_SW_Africa_N  | U6b2       | U           | U6           | 26             |
| 2207 | JQ704009.1           | JQ704009.1; U2e2a1b; Asia_S_W_Europe; 47; A73G; T152C; A200G  | 16571 | Asia_S_W_Europe   | U2e2a1b    | U           | U2           | 47             |
| 2208 | JQ704010.1           | JQ704010.1; H1au1b; Asia_W_Europe; 15; A263G; C315CC; A750G   | 16569 | Asia_W_Europe     | H1au1b     | H           | H            | 15             |
| 2209 | JQ704011.1           | JQ704011.1; U8a1a1a; Asia_W_Europe ; 34; A73G; A263G; T282C   | 16572 | Asia_W_Europe     | U8a1a1a    | U           | U8           | 34             |
| 2210 | JQ704012.1           | JQ704012.1; H5a1; Asia_W_Europe; 14; C150T; A263G; C315CC     | 16567 | Asia_W_Europe     | H5a1       | H           | H            | 14             |
| 2211 | JQ704013.1           | JQ704013.1; I1a1a; Asia_W_SW; 44; A73G; T199C; G203A          | 16573 | Asia_W_SW         | I1a1a      | I           | I            | 44             |
| 2212 | JQ704014.1           | JQ704014.1; V16; Europe_S; 17; T72C; A263G; C309CCT           | 16570 | Europe_S          | V16        | V           | V            | 17             |
| 2213 | JQ704015.1           | JQ704015.1; V3a; Europe_S; 18; T72C; T195C; A263G             | 16570 | Europe_S          | V3a        | V           | V            | 18             |
| 2214 | JQ704016.1           | JQ704016.1; V; Europe_S; 19; C41T; T72C; A263G                | 16570 | Europe_S          | V          | V           | V            | 19             |

**Supplementary Table S3** Human mitochondrial database (hMITO DB v1.0) metadata

| Row  | Name (accession no.) | Description                                                       | Size  | Geo_Region           | Haplogroup  | Macro_Haplo | Macro_Haplo2 | Total Variants |
|------|----------------------|-------------------------------------------------------------------|-------|----------------------|-------------|-------------|--------------|----------------|
| 2215 | JQ704017.1           | JQ704017.1; K1a2b; Asia_W; 36; A73G; T152C; A263G                 | 16573 | Asia_W               | K1a2b       | K           | K            | 36             |
| 2216 | JQ704018.1           | JQ704018.1; I1b; Asia_W_SW; 38; A73G; T199C; T204C                | 16573 | Asia_W_SW            | I1b         | I           | I            | 38             |
| 2217 | JQ704019.1           | JQ704019.1; V+@16298; Europe_S; 15; T72C; A263G; C315CC           | 16569 | Europe_S             | V+@16298    | V           | V            | 15             |
| 2218 | JQ704020.1           | JQ704020.1; T2c1d1; Asia_W; 46; A73G; C114T; T146C                | 16570 | Asia_W               | T2c1d1      | T           | T            | 46             |
| 2219 | JQ704021.1           | JQ704021.1; U4b1b1; Asia_N_Europe_N; 33; A73G; T146C; T152C       | 16569 | Asia_N_Europe_N      | U4b1b1      | U           | U4           | 33             |
| 2220 | JQ704022.1           | JQ704022.1; U5a1a1c; Asia_W_Europe_C; 29; A73G; A263G; C315CC     | 16569 | Asia_W_Europe_C      | U5a1a1c     | U           | U5           | 29             |
| 2221 | JQ704023.1           | JQ704023.1; V15a; Europe_S; 17; T72C; A263G; C309CCT              | 16570 | Europe_S             | V15a        | V           | V            | 17             |
| 2222 | JQ704024.1           | JQ704024.1; H44a; Asia_W_Europe; 11; A263G; C315CC; A750G         | 16569 | Asia_W_Europe        | H44a        | H           | H            | 11             |
| 2223 | JQ704025.1           | JQ704025.1; H2a1k; Asia_W_Europe; 12; C41T; A263G; C309CCT        | 16570 | Asia_W_Europe        | H2a1k       | H           | H            | 12             |
| 2224 | JQ704026.1           | JQ704026.1; U5a1h; Asia_W_Europe_C; 33; A73G; C150T; A263G        | 16569 | Asia_W_Europe_C      | U5a1h       | U           | U5           | 33             |
| 2225 | JQ704027.1           | JQ704027.1; H59a; Asia_W_Europe; 11; A263G; C315CC; A750G         | 16569 | Asia_W_Europe        | H59a        | H           | H            | 11             |
| 2226 | JQ704028.1           | JQ704028.1; U5a1b1c2; Asia_W_Europe_C; 29; A73G; A263G; C315CC    | 16569 | Asia_W_Europe_C      | U5a1b1c2    | U           | U5           | 29             |
| 2227 | JQ704029.1           | JQ704029.1; U5b2a2b1; Asia_W_Europe_C; 32; A73G; C150T; T154C     | 16569 | Asia_W_Europe_C      | U5b2a2b1    | U           | U5           | 32             |
| 2228 | JQ704030.1           | JQ704030.1; U6b1a; Asia_SW_Africa_N; 27; A73G; A263G; C309CCT     | 16570 | Asia_SW_Africa_N     | U6b1a       | U           | U6           | 27             |
| 2229 | JQ704031.1           | JQ704031.1; V7; Europe_S; 17; T72A; A93G; A263G                   | 16570 | Europe_S             | V7          | V           | V            | 17             |
| 2230 | JQ704032.1           | JQ704032.1; H1ae2; Asia_W_Europe; 14; A263G; C309CCT; T310C       | 16570 | Asia_W_Europe        | H1ae2       | H           | H            | 14             |
| 2231 | JQ704033.1           | JQ704033.1; J1c2; Asia_W; 32; A73G; G185A; A188G                  | 16569 | Asia_W               | J1c2        | J           | J            | 32             |
| 2232 | JQ704034.1           | JQ704034.1; U1a1c1b; Asia_W; 38; A73G; A263G; C285T               | 16570 | Asia_W               | U1a1c1b     | U           | U1           | 38             |
| 2233 | JQ704035.1           | JQ704035.1; U5a1b1; Asia_W_Europe_C; 27; A73G; A263G; C315CC      | 16569 | Asia_W_Europe_C      | U5a1b1      | U           | U5           | 27             |
| 2234 | JQ704036.1           | JQ704036.1; V3b; Europe_S; 18; T72C; A263G; C309CCT               | 16570 | Europe_S             | V3b         | V           | V            | 18             |
| 2235 | JQ704037.1           | JQ704037.1; V16; Europe_S; 17; T72C; A263G; C315CC                | 16569 | Europe_S             | V16         | V           | V            | 17             |
| 2236 | JQ704038.1           | JQ704038.1; H1f1; Asia_W_Europe; 14; A263G; C315CC; A385G         | 16569 | Asia_W_Europe        | H1f1        | H           | H            | 14             |
| 2237 | JQ704039.1           | JQ704039.1; H4a1a5; Asia_W_Europe; 18; A263G; C315CC; CA522d      | 16567 | Asia_W_Europe        | H4a1a5      | H           | H            | 18             |
| 2238 | JQ704040.1           | JQ704040.1; C1c6; Asia_NE_America_N_S; 47; A73G; T195C; A249d     | 16567 | Asia_NE_America_N_S  | C1c6        | C           | C            | 47             |
| 2239 | JQ704041.1           | JQ704041.1; J2a1; Asia_W; 34; A73G; C150T; T152C                  | 16570 | Asia_W               | J2a1        | J           | J            | 34             |
| 2240 | JQ704042.1           | JQ704042.1; U2e1; Asia_S_W_Europe; 38; A73G; T152C; T217C         | 16575 | Asia_S_W_Europe      | U2e1        | U           | U2           | 38             |
| 2241 | JQ704043.1           | JQ704043.1; U5b1c2b; Asia_W_Europe_C; 31; A73G; C150T; A263G      | 16569 | Asia_W_Europe_C      | U5b1c2b     | U           | U5           | 31             |
| 2242 | JQ704044.1           | JQ704044.1; U5a2b1b; Asia_W_Europe_C; 27; A73G; A263G; C315CC     | 16570 | Asia_W_Europe_C      | U5a2b1b     | U           | U5           | 27             |
| 2243 | JQ704045.1           | JQ704045.1; U5a1b+16362; Asia_W_Europe_C; 26; A73G; A263G; C315CC | 16569 | Asia_W_Europe_C      | U5a1b+16362 | U           | U5           | 26             |
| 2244 | JQ704046.1           | JQ704046.1; U5a1b1; Asia_W_Europe_C; 28; A73G; A263G; C315CC      | 16569 | Asia_W_Europe_C      | U5a1b1      | U           | U5           | 28             |
| 2245 | JQ704047.1           | JQ704047.1; V; Europe_S; 16; T72C; A263G; C309CCT                 | 16570 | Europe_S             | V           | V           | V            | 16             |
| 2246 | JQ704048.1           | JQ704048.1; H3+152; Asia_W_Europe; 12; T152C; A263G; C315CC       | 16571 | Asia_W_Europe        | H3+152      | H           | H            | 12             |
| 2247 | JQ704049.1           | JQ704049.1; M1b1a; Africa_E_Nile Valley; 44; A73G; T195C; A200G   | 16569 | Africa_E_Nile Valley | M1b1a       | M           | M1           | 44             |
| 2248 | JQ704050.1           | JQ704050.1; H1a3a; Asia_W_Europe; 14; A73G; A263G; C309CCT        | 16570 | Asia_W_Europe        | H1a3a       | H           | H            | 14             |
| 2249 | JQ704051.1           | JQ704051.1; J1c5c1; Asia_W; 35; A73G; G185A; G228A                | 16567 | Asia_W               | J1c5c1      | J           | J            | 35             |
| 2250 | JQ704052.1           | JQ704052.1; U4a2; Asia_N_Europe_N; 31; A73G; T195C; A263G         | 16572 | Asia_N_Europe_N      | U4a2        | U           | U4           | 31             |
| 2251 | JQ704053.1           | JQ704053.1; U5b1h; Asia_W_Europe_C; 28; A73G; C150T; A263G        | 16569 | Asia_W_Europe_C      | U5b1h       | U           | U5           | 28             |
| 2252 | JQ704054.1           | JQ704054.1; U5b2c1; Asia_W_Europe_C; 35; A73G; C150T; G185A       | 16575 | Asia_W_Europe_C      | U5b2c1      | U           | U5           | 35             |
| 2253 | JQ704055.1           | JQ704055.1; T2i1; Asia_W; 36; A73G; A263G; C309CCT                | 16570 | Asia_W               | T2i1        | T           | T            | 36             |
| 2254 | JQ704056.1           | JQ704056.1; K1a1b1e; Asia_W; 35; A73G; A263G; C315CC              | 16569 | Asia_W               | K1a1b1e     | K           | K            | 35             |
| 2255 | JQ704057.1           | JQ704057.1; K1b1a1a; Asia_W; 44; A73G; T152C; T199C               | 16571 | Asia_W               | K1b1a1a     | K           | K            | 44             |

**Supplementary Table S3** Human mitochondrial database (hMITO DB v1.0) metadata

| Row  | Name (accession no.) | Description                                                       | Size  | Geo_Region            | Haplogroup | Macro_Haplo | Macro_Haplo2 | Total Variants |
|------|----------------------|-------------------------------------------------------------------|-------|-----------------------|------------|-------------|--------------|----------------|
| 2256 | JQ704058.1           | JQ704058.1; H2a1; Asia_W_Europe; 9; A263G; C309CCT; T310C         | 16570 | Asia_W_Europe         | H2a1       | H           | H            | 9              |
| 2257 | JQ704059.1           | JQ704059.1; H5a1b; Asia_W_Europe; 15; A263G; C309CCT; T310C       | 16568 | Asia_W_Europe         | H5a1b      | H           | H            | 15             |
| 2258 | JQ704060.1           | JQ704060.1; H5a1j; Asia_W_Europe; 15; A263G; C309CCT; T310C       | 16570 | Asia_W_Europe         | H5a1j      | H           | H            | 15             |
| 2259 | JQ704061.1           | JQ704061.1; U2e1a1; Asia_S_W_Europe; 42; A73G; T152C; T217C       | 16572 | Asia_S_W_Europe       | U2e1a1     | U           | U2           | 42             |
| 2260 | JQ704062.1           | JQ704062.1; K1a16; Asia_W; 33; A73G; T195C; A263G                 | 16573 | Asia_W                | K1a16      | K           | K            | 33             |
| 2261 | JQ704063.1           | JQ704063.1; V2b2; Europe_S; 18; T72C; A263G; C309CCT              | 16570 | Europe_S              | V2b2       | V           | V            | 18             |
| 2262 | JQ704064.1           | JQ704064.1; K2b1b; Asia_W; 38; A73G; T146C; A263G                 | 16570 | Asia_W                | K2b1b      | K           | K            | 38             |
| 2263 | JQ704065.1           | JQ704065.1; U5b1b1a; Asia_W_Europe_C; 32; A73G; C150T; A263G      | 16570 | Asia_W_Europe_C       | U5b1b1a    | U           | U5           | 32             |
| 2264 | JQ704066.1           | JQ704066.1; H1a1a; Asia_W_Europe; 12; A263G; C315CC; A750G        | 16569 | Asia_W_Europe         | H1a1a      | H           | H            | 12             |
| 2265 | JQ704067.1           | JQ704067.1; U5a2c2; Asia_W_Europe_C; 26; A73G; A263G; C315CC      | 16569 | Asia_W_Europe_C       | U5a2c2     | U           | U5           | 26             |
| 2266 | JQ704068.1           | JQ704068.1; N1b1a2b; Africa_NE_Asia_W; 40; A73G; T152C; A263G     | 16569 | Africa_NE_Asia_W      | N1b1a2b    | N           | N1           | 40             |
| 2267 | JQ704069.1           | JQ704069.1; U4a1a; Asia_N_Europe_N; 34; A73G; T152C; T195C        | 16573 | Asia_N_Europe_N       | U4a1a      | U           | U4           | 34             |
| 2268 | JQ704070.1           | JQ704070.1; K2b1; Asia_W; 40; A73G; T146C; T152C                  | 16572 | Asia_W                | K2b1       | K           | K            | 40             |
| 2269 | JQ704071.1           | JQ704071.1; H5b1; Asia_W_Europe; 15; T146C; T195C; A263G          | 16570 | Asia_W_Europe         | H5b1       | H           | H            | 15             |
| 2270 | JQ704072.1           | JQ704072.1; H13a1a1; Asia_W_Europe; 16; A263G; C309CCT; T310C     | 16571 | Asia_W_Europe         | H13a1a1    | H           | H            | 16             |
| 2271 | JQ704073.1           | JQ704073.1; N1a3a1a; Africa_NE_Asia_W; 41; A73G; T152C; A189G     | 16567 | Africa_NE_Asia_W      | N1a3a1a    | N           | N1           | 41             |
| 2272 | JQ704074.1           | JQ704074.1; U5a2a1+152; Asia_W_Europe_C; 29; A73G; T152C; A263G   | 16570 | Asia_W_Europe_C       | U5a2a1+152 | U           | U5           | 29             |
| 2273 | JQ704075.1           | JQ704075.1; B4b1a2; Asia_SE_E_America_N_S; 32; A73G; G207A; A263G | 16560 | Asia_SE_E_America_N_S | B4b1a2     | B           | B            | 32             |
| 2274 | JQ704076.1           | JQ704076.1; K2a5a; Asia_W; 35; A73G; T146C; T152C                 | 16571 | Asia_W                | K2a5a      | K           | K            | 35             |
| 2275 | JQ704077.1           | JQ704077.1; I1f; Asia_W_SW; 41; A73G; T199C; T204C                | 16571 | Asia_W_SW             | I1f        | I           | I            | 41             |
| 2276 | JQ704078.1           | JQ704078.1; K1a4a1; Asia_W; 40; A73G; A263G; C315CC               | 16569 | Asia_W                | K1a4a1     | K           | K            | 40             |
| 2277 | JQ704079.1           | JQ704079.1; H3; Asia_W_Europe; 13; A263G; C315CC; A750G           | 16569 | Asia_W_Europe         | H3         | H           | H            | 13             |
| 2278 | JQ704080.1           | JQ704080.1; H1c6; Asia_W_Europe; 11; A263G; C309CCCT; T310C       | 16571 | Asia_W_Europe         | H1c6       | H           | H            | 11             |
| 2279 | JQ704081.1           | JQ704081.1; H11b1; Asia_W_Europe; 16; T152C; T195C; A263G         | 16569 | Asia_W_Europe         | H11b1      | H           | H            | 16             |
| 2280 | JQ704082.1           | JQ704082.1; H10e; Asia_W_Europe; 13; A263G; C309CCCT; T310C       | 16571 | Asia_W_Europe         | H10e       | H           | H            | 13             |
| 2281 | JQ704083.1           | JQ704083.1; H17; Asia_W_Europe; 13; C256T; A263G; C315CC          | 16569 | Asia_W_Europe         | H17        | H           | H            | 13             |
| 2282 | JQ704084.1           | JQ704084.1; U5a1a1+152; Asia_W_Europe_C; 29; A73G; T152C; A263G   | 16570 | Asia_W_Europe_C       | U5a1a1+152 | U           | U5           | 29             |
| 2283 | JQ704085.1           | JQ704085.1; H1+16189; Asia_W_Europe; 12; G207A; A263G; C309CCCT   | 16571 | Asia_W_Europe         | H1+16189   | H           | H            | 12             |
| 2284 | JQ704086.1           | JQ704086.1; H1b1+16362; Asia_W_Europe; 15; A263G; C315CC; CA522d  | 16567 | Asia_W_Europe         | H1b1+16362 | H           | H            | 15             |
| 2285 | JQ704087.1           | JQ704087.1; V+@16298; Europe_S; 13; T72C; A263G; C315CC           | 16569 | Europe_S              | V+@16298   | V           | V            | 13             |
| 2286 | JQ704088.1           | JQ704088.1; H; Asia_W_Europe; 10; A263G; C309CCT; T310C           | 16570 | Asia_W_Europe         | H          | H           | H            | 10             |
| 2287 | JQ704089.1           | JQ704089.1; H1br; Asia_W_Europe; 12; A263G; C315CC; A750G         | 16569 | Asia_W_Europe         | H1br       | H           | H            | 12             |
| 2288 | JQ704090.1           | JQ704090.1; H1j5; Asia_W_Europe; 15; A263G; C309CCCT; T310C       | 16571 | Asia_W_Europe         | H1j5       | H           | H            | 15             |
| 2289 | JQ704091.1           | JQ704091.1; H1a; Asia_W_Europe; 14; A73G; A263G; C309CCT          | 16570 | Asia_W_Europe         | H1a        | H           | H            | 14             |
| 2290 | JQ704092.1           | JQ704092.1; K1a4a1; Asia_W; 40; A73G; A200G; A235G                | 16571 | Asia_W                | K1a4a1     | K           | K            | 40             |
| 2291 | JQ704093.1           | JQ704093.1; H14a; Asia_W_Europe; 13; A263G; C309CCT; T310C        | 16570 | Asia_W_Europe         | H14a       | H           | H            | 13             |
| 2292 | JQ704094.1           | JQ704094.1; L2c2b1a; Africa_W_C; 65; A73G; A93G; T146C            | 16567 | Africa_W_C            | L2c2b1a    | L2          | L2           | 65             |
| 2293 | JQ704095.1           | JQ704095.1; H1n1b; Asia_W_Europe; 17; T146C; A263G; C309CCT       | 16574 | Asia_W_Europe         | H1n1b      | H           | H            | 17             |
| 2294 | JQ704096.1           | JQ704096.1; K1a1b1d; Asia_W; 36; A73G; A263G; C315CC              | 16569 | Asia_W                | K1a1b1d    | K           | K            | 36             |
| 2295 | JQ704097.1           | JQ704097.1; J1b1a1b; Asia_W; 39; A73G; C242T; A263G               | 16569 | Asia_W                | J1b1a1b    | J           | J            | 39             |
| 2296 | JQ704098.1           | JQ704098.1; U4b1a2a; Asia_N_Europe_N; 38; A73G; T195C; A263G      | 16572 | Asia_N_Europe_N       | U4b1a2a    | U           | U4           | 38             |



**Supplementary Table S3** Human mitochondrial database (hMITO DB v1.0) metadata

| Row  | Name (accession no.) | Description                                                   | Size  | Geo_Region       | Haplogroup | Macro_Haplo | Macro_Haplo2 | Total Variants |
|------|----------------------|---------------------------------------------------------------|-------|------------------|------------|-------------|--------------|----------------|
| 2297 | JQ704099.1           | JQ704099.1; U6a3a2a; Asia_SW_Africa_N; 31; A73G; G185A; A263G | 16569 | Asia_SW_Africa_N | U6a3a2a    | U           | U6           | 31             |
| 2298 | JQ704100.1           | JQ704100.1; U7b2; Asia_W; 34; A73G; T152C; A263G              | 16567 | Asia_W           | U7b2       | U           | U7           | 34             |
| 2299 | JQ704101.1           | JQ704101.1; H11a; Asia_W_Europe; 17; T195C; G228A; A263G      | 16571 | Asia_W_Europe    | H11a       | H           | H            | 17             |
| 2300 | JQ704102.1           | JQ704102.1; U2e3a; Asia_S_W_Europe; 44; A73G; T152C; T217C    | 16572 | Asia_S_W_Europe  | U2e3a      | U           | U2           | 44             |
| 2301 | JQ704103.1           | JQ704103.1; J1c7a; Asia_W; 35; A73G; G185A; G228A             | 16569 | Asia_W           | J1c7a      | J           | J            | 35             |
| 2302 | JQ704104.1           | JQ704104.1; V7b; Europe_S; 19; T72C; A93G; A263G              | 16570 | Europe_S         | V7b        | V           | V            | 19             |
| 2303 | JQ704105.1           | JQ704105.1; H3b1b1a; Asia_W_Europe; 19; A153G; A263G; C309CCT | 16570 | Asia_W_Europe    | H3b1b1a    | H           | H            | 19             |
| 2304 | JQ704106.1           | JQ704106.1; H1a3; Asia_W_Europe; 14; A73G; A263G; C315CC      | 16569 | Asia_W_Europe    | H1a3       | H           | H            | 14             |
| 2305 | JQ704107.1           | JQ704107.1; M3a1+204; Asia_S; 31; A73G; T204C; A235G          | 16570 | Asia_S           | M3a1+204   | M           | M3           | 31             |
| 2306 | JQ704108.1           | JQ704108.1; H10e1a; Asia_W_Europe; 14; A263G; C309CCT; T310C  | 16570 | Asia_W_Europe    | H10e1a     | H           | H            | 14             |
| 2307 | JQ704109.1           | JQ704109.1; K1a4a1; Asia_W; 35; A73G; A263G; C309CCT          | 16572 | Asia_W           | K1a4a1     | K           | K            | 35             |
| 2308 | JQ704110.1           | JQ704110.1; H26c; Asia_W_Europe; 12; T146C; A263G; C315CC     | 16569 | Asia_W_Europe    | H26c       | H           | H            | 12             |
| 2309 | JQ704111.1           | JQ704111.1; H13b1a; Asia_W_Europe; 14; A200G; A263G; C315CC   | 16569 | Asia_W_Europe    | H13b1a     | H           | H            | 14             |
| 2310 | JQ704112.1           | JQ704112.1; U5b1; Asia_W_Europe_C; 29; A73G; T146C; C150T     | 16568 | Asia_W_Europe_C  | U5b1       | U           | U5           | 29             |
| 2311 | JQ704113.1           | JQ704113.1; H13a1a1; Asia_W_Europe; 16; T152C; A263G; C309CCT | 16570 | Asia_W_Europe    | H13a1a1    | H           | H            | 16             |
| 2312 | JQ704114.1           | JQ704114.1; H3h7; Asia_W_Europe; 13; A93G; A263G; C315CC      | 16569 | Asia_W_Europe    | H3h7       | H           | H            | 13             |
| 2313 | JQ704115.1           | JQ704115.1; H3h; Asia_W_Europe; 12; A263G; C315CC; A750G      | 16569 | Asia_W_Europe    | H3h        | H           | H            | 12             |
| 2314 | JQ704116.1           | JQ704116.1; H6a1b3a; Asia_W_Europe; 21; T204C; T239C; A263G   | 16571 | Asia_W_Europe    | H6a1b3a    | H           | H            | 21             |
| 2315 | JQ704117.1           | JQ704117.1; H1a2; Asia_W_Europe; 13; A73G; A263G; C309CCT     | 16570 | Asia_W_Europe    | H1a2       | H           | H            | 13             |
| 2316 | JQ704118.1           | JQ704118.1; J1b1a1a; Asia_W; 40; A73G; C242T; A263G           | 16569 | Asia_W           | J1b1a1a    | J           | J            | 40             |
| 2317 | JQ704119.1           | JQ704119.1; H1c3a; Asia_W_Europe; 16; T146C; A257G; A263G     | 16570 | Asia_W_Europe    | H1c3a      | H           | H            | 16             |
| 2318 | JQ704120.1           | JQ704120.1; H3s; Asia_W_Europe; 12; C194T; A263G; C315CC      | 16569 | Asia_W_Europe    | H3s        | H           | H            | 12             |
| 2319 | JQ704121.1           | JQ704121.1; U4c1; Asia_N_Europe_N; 37; A73G; A189G; T195C     | 16569 | Asia_N_Europe_N  | U4c1       | U           | U4           | 37             |
| 2320 | JQ704122.1           | JQ704122.1; H1e1a; Asia_W_Europe; 16; T55TT; T57C; T59C       | 16572 | Asia_W_Europe    | H1e1a      | H           | H            | 16             |
| 2321 | JQ704123.1           | JQ704123.1; H2a1; Asia_W_Europe; 9; A263G; C315CC; A750G      | 16569 | Asia_W_Europe    | H2a1       | H           | H            | 9              |
| 2322 | JQ704124.1           | JQ704124.1; HV16; Asia_W; 14; A263G; C309CCT; T310C           | 16570 | Asia_W           | HV16       | HV          | HV           | 14             |
| 2323 | JQ704125.1           | JQ704125.1; H26a1; Asia_W_Europe; 13; T152C; A263G; C315CC    | 16571 | Asia_W_Europe    | H26a1      | H           | H            | 13             |
| 2324 | JQ704126.1           | JQ704126.1; V2c; Europe_S; 16; T72C; A263G; C315CC            | 16569 | Europe_S         | V2c        | V           | V            | 16             |
| 2325 | JQ704127.1           | JQ704127.1; H6a1a3; Asia_W_Europe; 18; T239C; A263G; C309CCCT | 16569 | Asia_W_Europe    | H6a1a3     | H           | H            | 18             |
| 2326 | JQ704128.1           | JQ704128.1; H1e2a; Asia_W_Europe; 14; A263G; C309CCT; T310C   | 16570 | Asia_W_Europe    | H1e2a      | H           | H            | 14             |
| 2327 | JQ704129.1           | JQ704129.1; T2f; Asia_W; 37; A73G; T152C; A263G               | 16563 | Asia_W           | T2f        | T           | T            | 37             |
| 2328 | JQ704130.1           | JQ704130.1; U3b2; Africa_NE_Asia_W; 30; A73G; C150T; T195C    | 16567 | Africa_NE_Asia_W | U3b2       | U           | U3           | 30             |
| 2329 | JQ704131.1           | JQ704131.1; H3; Asia_W_Europe; 13; T72G; A263G; C309CCT       | 16570 | Asia_W_Europe    | H3         | H           | H            | 13             |
| 2330 | JQ704132.1           | JQ704132.1; H42; Asia_W_Europe; 11; A263G; C315CC; A750G      | 16569 | Asia_W_Europe    | H42        | H           | H            | 11             |
| 2331 | JQ704133.1           | JQ704133.1; H3p; Asia_W_Europe; 16; T146C; A263G; C309CCT     | 16570 | Asia_W_Europe    | H3p        | H           | H            | 16             |
| 2332 | JQ704134.1           | JQ704134.1; H1c1; Asia_W_Europe; 13; A263G; C309CCT; T310C    | 16570 | Asia_W_Europe    | H1c1       | H           | H            | 13             |
| 2333 | JQ704135.1           | JQ704135.1; H3aj; Asia_W_Europe; 12; A263G; C315CC; C573CC    | 16570 | Asia_W_Europe    | H3aj       | H           | H            | 12             |
| 2334 | JQ704136.1           | JQ704136.1; H3b2; Asia_W_Europe; 13; A263G; C309CCT; T310C    | 16570 | Asia_W_Europe    | H3b2       | H           | H            | 13             |
| 2335 | JQ704137.1           | JQ704137.1; H78; Asia_W_Europe; 15; A263G; C309CCCT; T310C    | 16571 | Asia_W_Europe    | H78        | H           | H            | 15             |
| 2336 | JQ704138.1           | JQ704138.1; H1bd; Asia_W_Europe; 13; T204C; A263G; C315CC     | 16569 | Asia_W_Europe    | H1bd       | H           | H            | 13             |
| 2337 | JQ704139.1           | JQ704139.1; H1b3; Asia_W_Europe; 16; A263G; C309CCCT; T310C   | 16571 | Asia_W_Europe    | H1b3       | H           | H            | 16             |

**Supplementary Table S3** Human mitochondrial database (hMITO DB v1.0) metadata

| Row  | Name (accession no.) | Description                                                    | Size  | Geo_Region        | Haplogroup | Macro_ Haplo | Macro_ Haplo2 | Total Variants |
|------|----------------------|----------------------------------------------------------------|-------|-------------------|------------|--------------|---------------|----------------|
| 2338 | JQ704140.1           | JQ704140.1; H2a2b2; Asia_W_Europe; 8; A263G; C309CCT; T310C    | 16570 | Asia_W_Europe     | H2a2b2     | H            | H             | 8              |
| 2339 | JQ704141.1           | JQ704141.1; H1a5; Asia_W_Europe; 12; A73G; A263G; C315CC       | 16569 | Asia_W_Europe     | H1a5       | H            | H             | 12             |
| 2340 | JQ704142.1           | JQ704142.1; HV0g; Asia_W; 17; T72C; T195C; A263G               | 16573 | Asia_W            | HV0g       | HV           | HV            | 17             |
| 2341 | JQ704143.1           | JQ704143.1; HV0c; Asia_W; 14; T72C; T195C; A263G               | 16570 | Asia_W            | HV0c       | HV           | HV            | 14             |
| 2342 | JQ704144.1           | JQ704144.1; H51a; Asia_W_Europe; 13; A263G; C309CCT; T310C     | 16570 | Asia_W_Europe     | H51a       | H            | H             | 13             |
| 2343 | JQ704145.1           | JQ704145.1; H6a1a; Asia_W_Europe; 18; T146C; T239C; A263G      | 16570 | Asia_W_Europe     | H6a1a      | H            | H             | 18             |
| 2344 | JQ704146.1           | JQ704146.1; H5a1; Asia_W_Europe; 13; A263G; C315CC; C456T      | 16567 | Asia_W_Europe     | H5a1       | H            | H             | 13             |
| 2345 | JQ704147.1           | JQ704147.1; H13b1b; Asia_W_Europe; 21; A200G; A263G; C309CCT   | 16568 | Asia_W_Europe     | H13b1b     | H            | H             | 21             |
| 2346 | JQ704148.1           | JQ704148.1; H5a2; Asia_W_Europe; 14; A263G; C309CCT; T310C     | 16570 | Asia_W_Europe     | H5a2       | H            | H             | 14             |
| 2347 | JQ704149.1           | JQ704149.1; H63; Asia_W_Europe; 10; A263G; C315CC; A750G       | 16569 | Asia_W_Europe     | H63        | H            | H             | 10             |
| 2348 | JQ704150.1           | JQ704150.1; H5a7; Asia_W_Europe; 14; A263G; C309CCT; T310C     | 16570 | Asia_W_Europe     | H5a7       | H            | H             | 14             |
| 2349 | JQ704151.1           | JQ704151.1; H67; Asia_W_Europe; 13; A263G; C309CCT; T310C      | 16570 | Asia_W_Europe     | H67        | H            | H             | 13             |
| 2350 | JQ704152.1           | JQ704152.1; H28a; Asia_W_Europe; 13; C186A; A263G; C315CC      | 16569 | Asia_W_Europe     | H28a       | H            | H             | 13             |
| 2351 | JQ704153.1           | JQ704153.1; U1a1b; Asia_W; 35; A73G; T152C; A263G              | 16570 | Asia_W            | U1a1b      | U            | U1            | 35             |
| 2352 | JQ704154.1           | JQ704154.1; H1aw; Asia_W_Europe; 14; A263G; C315CC; T460C      | 16569 | Asia_W_Europe     | H1aw       | H            | H             | 14             |
| 2353 | JQ704155.1           | JQ704155.1; U4b1b1b; Asia_N_Europe_N; 36; A73G; T152C; T195C   | 16569 | Asia_N_Europe_N   | U4b1b1b    | U            | U4            | 36             |
| 2354 | JQ704156.1           | JQ704156.1; H1be; Asia_W_Europe; 13; A263G; C309CCT; T310C     | 16570 | Asia_W_Europe     | H1be       | H            | H             | 13             |
| 2355 | JQ704157.1           | JQ704157.1; H1y; Asia_W_Europe; 12; A263G; C309CCT; T310C      | 16570 | Asia_W_Europe     | H1y        | H            | H             | 12             |
| 2356 | JQ704158.1           | JQ704158.1; H1as1a; Asia_W_Europe; 16; C150T; A263G; C309CCT   | 16570 | Asia_W_Europe     | H1as1a     | H            | H             | 16             |
| 2357 | JQ704159.1           | JQ704159.1; H1b1c; Asia_W_Europe; 16; A263G; C315CC; C483T     | 16567 | Asia_W_Europe     | H1b1c      | H            | H             | 16             |
| 2358 | JQ704160.1           | JQ704160.1; W3a1d; Asia_W; 40; A73G; A189G; C194T              | 16570 | Asia_W            | W3a1d      | W            | W             | 40             |
| 2359 | JQ704161.1           | JQ704161.1; H14a2a; Asia_W_Europe; 17; A263G; C309CCT; T310C   | 16570 | Asia_W_Europe     | H14a2a     | H            | H             | 17             |
| 2360 | JQ704162.1           | JQ704162.1; H1bc; Asia_W_Europe; 11; T152C; A263G; C315CC      | 16569 | Asia_W_Europe     | H1bc       | H            | H             | 11             |
| 2361 | JQ704163.1           | JQ704163.1; H1af1a; Asia_W_Europe; 13; T152C; A263G; C315CC    | 16569 | Asia_W_Europe     | H1af1a     | H            | H             | 13             |
| 2362 | JQ704164.1           | JQ704164.1; H11a+152; Asia_W_Europe; 16; T152C; T195C; A263G   | 16570 | Asia_W_Europe     | H11a+152   | H            | H             | 16             |
| 2363 | JQ704165.1           | JQ704165.1; H26a1; Asia_W_Europe; 18; T152C; A263G; C309CCCT   | 16571 | Asia_W_Europe     | H26a1      | H            | H             | 18             |
| 2364 | JQ704166.1           | JQ704166.1; H11a2; Asia_W_Europe; 16; T152C; T195C; A263G      | 16569 | Asia_W_Europe     | H11a2      | H            | H             | 16             |
| 2365 | JQ704167.1           | JQ704167.1; H6a1b2; Asia_W_Europe; 17; T239C; A263G; C315CC    | 16569 | Asia_W_Europe     | H6a1b2     | H            | H             | 17             |
| 2366 | JQ704168.1           | JQ704168.1; H3k1a; Asia_W_Europe; 15; T152C; A263G; C315CC     | 16569 | Asia_W_Europe     | H3k1a      | H            | H             | 15             |
| 2367 | JQ704169.1           | JQ704169.1; H17; Asia_W_Europe; 13; A263G; C309CCT; T310C      | 16570 | Asia_W_Europe     | H17        | H            | H             | 13             |
| 2368 | JQ704170.1           | JQ704170.1; H1ag1b; Asia_W_Europe; 14; A263G; C309CCT; T310C   | 16570 | Asia_W_Europe     | H1ag1b     | H            | H             | 14             |
| 2369 | JQ704171.1           | JQ704171.1; H7a2; Asia_W_Europe; 14; A263G; C309CCT; T310C     | 16570 | Asia_W_Europe     | H7a2       | H            | H             | 14             |
| 2370 | JQ704172.1           | JQ704172.1; H3c2b; Asia_W_Europe; 13; T195C; A263G; C315CC     | 16569 | Asia_W_Europe     | H3c2b      | H            | H             | 13             |
| 2371 | JQ704173.1           | JQ704173.1; H2a2a2; Asia_W_Europe; 7; T152C; A263G; C309CCT    | 16571 | Asia_W_Europe     | H2a2a2     | H            | H             | 7              |
| 2372 | JQ704174.1           | JQ704174.1; H6a1b4; Asia_W_Europe; 19; T239C; A263G; C309CCT   | 16570 | Asia_W_Europe     | H6a1b4     | H            | H             | 19             |
| 2373 | JQ704175.1           | JQ704175.1; H1c9a; Asia_W_Europe; 14; T152C; A263G; C315CC     | 16569 | Asia_W_Europe     | H1c9a      | H            | H             | 14             |
| 2374 | JQ704176.1           | JQ704176.1; H13a1a6; Asia_W_Europe; 14; G228A; A263G; C309CCCT | 16571 | Asia_W_Europe     | H13a1a6    | H            | H             | 14             |
| 2375 | JQ704177.1           | JQ704177.1; H1ax1; Asia_W_Europe; 17; C150T; A263G; C309CCCT   | 16571 | Asia_W_Europe     | H1ax1      | H            | H             | 17             |
| 2376 | JQ704178.1           | JQ704178.1; H3z2; Asia_W_Europe; 15; A263G; T293C; C309CCT     | 16570 | Asia_W_Europe     | H3z2       | H            | H             | 15             |
| 2377 | JQ704179.1           | JQ704179.1; H6c; Asia_W_Europe; 13; T239C; A263G; C315CC       | 16569 | Asia_W_Europe     | H6c        | H            | H             | 13             |
| 2378 | JQ704180.1           | JQ704180.1; A2+(64); Asia_NE_America_N; 32; C64T; A73G; T146C  | 16568 | Asia_NE_America_N | A2+(64)    | A            | A             | 32             |

**Supplementary Table S3** Human mitochondrial database (hMITO DB v1.0) metadata

| Row  | Name (accession no.) | Description                                                     | Size  | Geo_Region          | Haplogroup | Macro_Haplo | Macro_Haplo2 | Total Variants |
|------|----------------------|-----------------------------------------------------------------|-------|---------------------|------------|-------------|--------------|----------------|
| 2379 | JQ704181.1           | JQ704181.1; U4c1; Asia_N_Europe_N; 35; A73G; T195C; A263G       | 16570 | Asia_N_Europe_N     | U4c1       | U           | U4           | 35             |
| 2380 | JQ704182.1           | JQ704182.1; H17; Asia_W_Europe; 12; A263G; C315CC; A750G        | 16569 | Asia_W_Europe       | H17        | H           | H            | 12             |
| 2381 | JQ704183.1           | JQ704183.1; H3ao1; Asia_W_Europe; 13; A263G; C315CC; A750G      | 16569 | Asia_W_Europe       | H3ao1      | H           | H            | 13             |
| 2382 | JQ704184.1           | JQ704184.1; HV15; Asia_W; 14; A263G; C309CCT; T310C             | 16570 | Asia_W              | HV15       | HV          | HV           | 14             |
| 2383 | JQ704185.1           | JQ704185.1; H11a; Asia_W_Europe; 16; T195C; A263G; C309CCT      | 16570 | Asia_W_Europe       | H11a       | H           | H            | 16             |
| 2384 | JQ704186.1           | JQ704186.1; H1bf; Asia_W_Europe; 16; T152C; A263G; C315CC       | 16569 | Asia_W_Europe       | H1bf       | H           | H            | 16             |
| 2385 | JQ704187.1           | JQ704187.1; K1a10a; Asia_W; 34; A73G; T195C; A263G              | 16573 | Asia_W              | K1a10a     | K           | K            | 34             |
| 2386 | JQ704188.1           | JQ704188.1; HV0a; Asia_W; 15; T72C; A263G; C295T                | 16570 | Asia_W              | HV0a       | HV          | HV           | 15             |
| 2387 | JQ704189.1           | JQ704189.1; H2a1e1; Asia_W_Europe; 11; A263G; C309CCT; T310C    | 16570 | Asia_W_Europe       | H2a1e1     | H           | H            | 11             |
| 2388 | JQ704190.1           | JQ704190.1; H3e; Asia_W_Europe; 13; A263G; C309CCCT; T310C      | 16571 | Asia_W_Europe       | H3e        | H           | H            | 13             |
| 2389 | JQ704191.1           | JQ704191.1; H1; Asia_W_Europe; 12; A263G; C315CC; A750G         | 16569 | Asia_W_Europe       | H1         | H           | H            | 12             |
| 2390 | JQ704192.1           | JQ704192.1; H3as; Asia_W_Europe; 10; A263G; C315CC; A750G       | 16569 | Asia_W_Europe       | H3as       | H           | H            | 10             |
| 2391 | JQ704193.1           | JQ704193.1; H1m; Asia_W_Europe; 17; C150T; A263G; C309CCT       | 16570 | Asia_W_Europe       | H1m        | H           | H            | 17             |
| 2392 | JQ704194.1           | JQ704194.1; H1t; Asia_W_Europe; 19; A95C; T195C; A263G          | 16570 | Asia_W_Europe       | H1t        | H           | H            | 19             |
| 2393 | JQ704195.1           | JQ704195.1; H6a1a6; Asia_W_Europe; 17; T239C; A263G; A288G      | 16572 | Asia_W_Europe       | H6a1a6     | H           | H            | 17             |
| 2394 | JQ704196.1           | JQ704196.1; H1ae; Asia_W_Europe; 17; A263G; C309CCT; T310C      | 16570 | Asia_W_Europe       | H1ae       | H           | H            | 17             |
| 2395 | JQ704197.1           | JQ704197.1; H3b4; Asia_W_Europe; 13; A263G; C309CCCT; T310C     | 16571 | Asia_W_Europe       | H3b4       | H           | H            | 13             |
| 2396 | JQ704198.1           | JQ704198.1; H2a1a1; Asia_W_Europe; 14; A263G; C315CC; A750G     | 16569 | Asia_W_Europe       | H2a1a1     | H           | H            | 14             |
| 2397 | JQ704199.1           | JQ704199.1; H1j4; Asia_W_Europe; 13; A263G; C309CCCT; T310C     | 16571 | Asia_W_Europe       | H1j4       | H           | H            | 13             |
| 2398 | JQ704200.1           | JQ704200.1; H1b1+16362; Asia_W_Europe; 14; C151T; A263G; C315CC | 16567 | Asia_W_Europe       | H1b1+16362 | H           | H            | 14             |
| 2399 | JQ704201.1           | JQ704201.1; H56; Asia_W_Europe; 12; A263G; C309CCT; T310C       | 16570 | Asia_W_Europe       | H56        | H           | H            | 12             |
| 2400 | JQ704202.1           | JQ704202.1; H1n+146; Asia_W_Europe; 11; T146C; A263G; C315CC    | 16569 | Asia_W_Europe       | H1n+146    | H           | H            | 11             |
| 2401 | JQ704203.1           | JQ704203.1; H1+16189; Asia_W_Europe; 14; A263G; C309CCCT; T310C | 16571 | Asia_W_Europe       | H1+16189   | H           | H            | 14             |
| 2402 | JQ704204.1           | JQ704204.1; H1a3; Asia_W_Europe; 14; A73G; A263G; C315CC        | 16569 | Asia_W_Europe       | H1a3       | H           | H            | 14             |
| 2403 | JQ704205.1           | JQ704205.1; H18b; Asia_W_Europe; 12; A263G; C315CC; A750G       | 16569 | Asia_W_Europe       | H18b       | H           | H            | 12             |
| 2404 | JQ704206.1           | JQ704206.1; H27; Asia_W_Europe; 19; T63C; C64T; G66A            | 16569 | Asia_W_Europe       | H27        | H           | H            | 19             |
| 2405 | JQ704207.1           | JQ704207.1; K1a1b1e; Asia_W; 37; A73G; C114T; T146C             | 16567 | Asia_W              | K1a1b1e    | K           | K            | 37             |
| 2406 | JQ704208.1           | JQ704208.1; H6a2a; Asia_W_Europe; 16; T152C; T239C; A263G       | 16570 | Asia_W_Europe       | H6a2a      | H           | H            | 16             |
| 2407 | JQ704209.1           | JQ704209.1; H10e; Asia_W_Europe; 12; A263G; C309CCCT; T310C     | 16571 | Asia_W_Europe       | H10e       | H           | H            | 12             |
| 2408 | JQ704210.1           | JQ704210.1; C1b11; Asia_NE_America_N_S; 46; T63d; A73G; C194T   | 16565 | Asia_NE_America_N_S | C1b11      | C           | C            | 46             |
| 2409 | JQ704211.1           | JQ704211.1; J1c3; Asia_W; 33; A73G; C150T; G185A                | 16570 | Asia_W              | J1c3       | J           | J            | 33             |
| 2410 | JQ704212.1           | JQ704212.1; H1bi; Asia_W_Europe; 11; A263G; C309CCCT; T310C     | 16571 | Asia_W_Europe       | H1bi       | H           | H            | 11             |
| 2411 | JQ704213.1           | JQ704213.1; V1a; Europe_S; 19; A263G; C309CCCT; T310C           | 16571 | Europe_S            | V1a        | V           | V            | 19             |
| 2412 | JQ704214.1           | JQ704214.1; H2a5; Asia_W_Europe; 8; A263G; C309CCCT; T310C      | 16571 | Asia_W_Europe       | H2a5       | H           | H            | 8              |
| 2413 | JQ704215.1           | JQ704215.1; U4a1; Asia_N_Europe_N; 32; A73G; T152C; T195C       | 16569 | Asia_N_Europe_N     | U4a1       | U           | U4           | 32             |
| 2414 | JQ704216.1           | JQ704216.1; K1a1b1a; Asia_W; 38; A73G; C114T; A263G             | 16569 | Asia_W              | K1a1b1a    | K           | K            | 38             |
| 2415 | JQ704217.1           | JQ704217.1; HV10; Asia_W; 14; A263G; C309CCCT; T310C            | 16571 | Asia_W              | HV10       | HV          | HV           | 14             |
| 2416 | JQ704218.1           | JQ704218.1; H13a1a; Asia_W_Europe; 13; A263G; C309CCT; T310C    | 16572 | Asia_W_Europe       | H13a1a     | H           | H            | 13             |
| 2417 | JQ704219.1           | JQ704219.1; H1bs; Asia_W_Europe; 12; T152C; A263G; C309CCT      | 16570 | Asia_W_Europe       | H1bs       | H           | H            | 12             |
| 2418 | JQ704220.1           | JQ704220.1; H2a3a1; Asia_W_Europe; 12; T146C; A263G; C309CCT    | 16570 | Asia_W_Europe       | H2a3a1     | H           | H            | 12             |
| 2419 | JQ704221.1           | JQ704221.1; H15a1; Asia_W_Europe; 14; T55C; T57C; A263G         | 16571 | Asia_W_Europe       | H15a1      | H           | H            | 14             |

**Supplementary Table S3** Human mitochondrial database (hMITO DB v1.0) metadata

| Row  | Name (accession no.) | Description                                                     | Size  | Geo_Region      | Haplogroup | Macro_Haplo | Macro_Haplo2 | Total Variants |
|------|----------------------|-----------------------------------------------------------------|-------|-----------------|------------|-------------|--------------|----------------|
| 2420 | JQ704222.1           | JQ704222.1; H3+16189; Asia_W_Europe; 15; A263G; C309CCT; T310C  | 16570 | Asia_W_Europe   | H3+16189   | H           | H            | 15             |
| 2421 | JQ704223.1           | JQ704223.1; H1a4; Asia_W_Europe; 13; A73G; A263G; C309CCT       | 16570 | Asia_W_Europe   | H1a4       | H           | H            | 13             |
| 2422 | JQ704224.1           | JQ704224.1; H2a2a1g; Asia_W_Europe; 3; C315CC; T14798C; T16189C | 16569 | Asia_W_Europe   | H2a2a1g    | H           | H            | 3              |
| 2423 | JQ704225.1           | JQ704225.1; H5a1; Asia_W_Europe; 16; T195C; A240G; A263G        | 16567 | Asia_W_Europe   | H5a1       | H           | H            | 16             |
| 2424 | JQ704226.1           | JQ704226.1; H1+16278; Asia_W_Europe; 12; A93G; T146C; A263G     | 16569 | Asia_W_Europe   | H1+16278   | H           | H            | 12             |
| 2425 | JQ704227.1           | JQ704227.1; H27e; Asia_W_Europe; 13; A263G; C309CCT; T310C      | 16561 | Asia_W_Europe   | H27e       | H           | H            | 13             |
| 2426 | JQ704228.1           | JQ704228.1; K1a9; Asia_W; 33; A73G; T195C; A263G                | 16569 | Asia_W          | K1a9       | K           | K            | 33             |
| 2427 | JQ704229.1           | JQ704229.1; HV9a1; Asia_W; 17; T131C; T152C; A263G              | 16570 | Asia_W          | HV9a1      | HV          | HV           | 17             |
| 2428 | JQ704230.1           | JQ704230.1; H1+16239; Asia_W_Europe; 10; A263G; C315CC; A750G   | 16569 | Asia_W_Europe   | H1+16239   | H           | H            | 10             |
| 2429 | JQ704231.1           | JQ704231.1; H4a1a1a; Asia_W_Europe; 21; A73G; A263G; C309CCT    | 16568 | Asia_W_Europe   | H4a1a1a    | H           | H            | 21             |
| 2430 | JQ704232.1           | JQ704232.1; H3ao; Asia_W_Europe; 11; A263G; C315CC; A750G       | 16569 | Asia_W_Europe   | H3ao       | H           | H            | 11             |
| 2431 | JQ704233.1           | JQ704233.1; H5b; Asia_W_Europe; 15; T146C; A263G; C309CCT       | 16570 | Asia_W_Europe   | H5b        | H           | H            | 15             |
| 2432 | JQ704234.1           | JQ704234.1; H13a1a1b; Asia_W_Europe; 17; A214G; A263G; C309CCT  | 16570 | Asia_W_Europe   | H13a1a1b   | H           | H            | 17             |
| 2433 | JQ704235.1           | JQ704235.1; H1ao1; Asia_W_Europe; 16; A93G; T146C; A263G        | 16569 | Asia_W_Europe   | H1ao1      | H           | H            | 16             |
| 2434 | JQ704236.1           | JQ704236.1; H3c1; Asia_W_Europe; 14; A189G; A263G; C315CC       | 16569 | Asia_W_Europe   | H3c1       | H           | H            | 14             |
| 2435 | JQ704237.1           | JQ704237.1; H5a6a; Asia_W_Europe; 16; T152C; A263G; C315CC      | 16569 | Asia_W_Europe   | H5a6a      | H           | H            | 16             |
| 2436 | JQ704238.1           | JQ704238.1; H5b1; Asia_W_Europe; 15; T146C; T195C; A263G        | 16571 | Asia_W_Europe   | H5b1       | H           | H            | 15             |
| 2437 | JQ704239.1           | JQ704239.1; H6a1b2c; Asia_W_Europe; 21; T239C; A263G; C309CCCT  | 16573 | Asia_W_Europe   | H6a1b2c    | H           | H            | 21             |
| 2438 | JQ704240.1           | JQ704240.1; H1; Asia_W_Europe; 14; A93G; A263G; C315CC          | 16569 | Asia_W_Europe   | H1         | H           | H            | 14             |
| 2439 | JQ704241.1           | JQ704241.1; H26a1; Asia_W_Europe; 12; A263G; C315CC; A750G      | 16569 | Asia_W_Europe   | H26a1      | H           | H            | 12             |
| 2440 | JQ704242.1           | JQ704242.1; H1c12; Asia_W_Europe; 12; A263G; C315CC; T477C      | 16569 | Asia_W_Europe   | H1c12      | H           | H            | 12             |
| 2441 | JQ704243.1           | JQ704243.1; H1a3c1; Asia_W_Europe; 16; A73G; A263G; C315CC      | 16569 | Asia_W_Europe   | H1a3c1     | H           | H            | 16             |
| 2442 | JQ704244.1           | JQ704244.1; H3a1; Asia_W_Europe; 17; T152C; A263G; C309CCT      | 16572 | Asia_W_Europe   | H3a1       | H           | H            | 17             |
| 2443 | JQ704245.1           | JQ704245.1; H1a3; Asia_W_Europe; 14; A73G; A263G; C315CC        | 16569 | Asia_W_Europe   | H1a3       | H           | H            | 14             |
| 2444 | JQ704246.1           | JQ704246.1; H5a3a; Asia_W_Europe; 16; A263G; C309CCT; T310C     | 16570 | Asia_W_Europe   | H5a3a      | H           | H            | 16             |
| 2445 | JQ704247.1           | JQ704247.1; U5a2a1; Asia_W_Europe_C; 32; A73G; A263G; C309CCT   | 16570 | Asia_W_Europe_C | U5a2a1     | U           | U5           | 32             |
| 2446 | JQ704248.1           | JQ704248.1; H5a1; Asia_W_Europe; 14; T146C; A263G; C315CC       | 16567 | Asia_W_Europe   | H5a1       | H           | H            | 14             |
| 2447 | JQ704249.1           | JQ704249.1; T1a1; Asia_W; 35; A73G; T152C; T195C                | 16570 | Asia_W          | T1a1       | T           | T            | 35             |
| 2448 | JQ704250.1           | JQ704250.1; H1e5a; Asia_W_Europe; 17; T152C; A263G; C315CC      | 16569 | Asia_W_Europe   | H1e5a      | H           | H            | 17             |
| 2449 | JQ704251.1           | JQ704251.1; H85; Asia_W_Europe; 13; A263G; C309CCCT; T310C      | 16571 | Asia_W_Europe   | H85        | H           | H            | 13             |
| 2450 | JQ704252.1           | JQ704252.1; H3ap; Asia_W_Europe; 13; A263G; C309CCT; T310C      | 16570 | Asia_W_Europe   | H3ap       | H           | H            | 13             |
| 2451 | JQ704253.1           | JQ704253.1; H3a1; Asia_W_Europe; 16; T152C; A263G; C309CCT      | 16570 | Asia_W_Europe   | H3a1       | H           | H            | 16             |
| 2452 | JQ704254.1           | JQ704254.1; H14b4; Asia_W_Europe; 15; A263G; C309CCT; T310C     | 16570 | Asia_W_Europe   | H14b4      | H           | H            | 15             |
| 2453 | JQ704255.1           | JQ704255.1; HV0+195; Asia_W; 17; T72C; T195C; A263G             | 16570 | Asia_W          | HV0+195    | HV          | HV           | 17             |
| 2454 | JQ704256.1           | JQ704256.1; H82; Asia_W_Europe; 12; T195C; A263G; C309CCT       | 16570 | Asia_W_Europe   | H82        | H           | H            | 12             |
| 2455 | JQ704257.1           | JQ704257.1; H1a1; Asia_W_Europe; 15; A73G; A263G; C315CC        | 16569 | Asia_W_Europe   | H1a1       | H           | H            | 15             |
| 2456 | JQ704258.1           | JQ704258.1; H1as1a; Asia_W_Europe; 16; A73G; C150T; A263G       | 16570 | Asia_W_Europe   | H1as1a     | H           | H            | 16             |
| 2457 | JQ704259.1           | JQ704259.1; H1c6; Asia_W_Europe; 12; A263G; C315CC; T477C       | 16569 | Asia_W_Europe   | H1c6       | H           | H            | 12             |
| 2458 | JQ704260.1           | JQ704260.1; H24a; Asia_W_Europe; 13; A263G; C315CC; A750G       | 16569 | Asia_W_Europe   | H24a       | H           | H            | 13             |
| 2459 | JQ704261.1           | JQ704261.1; H94; Asia_W_Europe; 11; A263G; C309CCT; T310C       | 16570 | Asia_W_Europe   | H94        | H           | H            | 11             |
| 2460 | JQ704262.1           | JQ704262.1; H2a2b3; Asia_W_Europe; 7; A263G; C309CCT; T310C     | 16570 | Asia_W_Europe   | H2a2b3     | H           | H            | 7              |

**Supplementary Table S3** Human mitochondrial database (hMITO DB v1.0) metadata

| Row  | Name (accession no.) | Description                                                        | Size  | Geo_Region        | Haplogroup  | Macro_ Haplo | Macro_ Haplo2 | Total Variants |
|------|----------------------|--------------------------------------------------------------------|-------|-------------------|-------------|--------------|---------------|----------------|
| 2461 | JQ704263.1           | JQ704263.1; H1+16239; Asia_W_Europe; 14; T152C; A263G; C309CCT     | 16570 | Asia_W_Europe     | H1+16239    | H            | H             | 14             |
| 2462 | JQ704264.1           | JQ704264.1; H5b2; Asia_W_Europe; 15; A263G; C309CCT; T310C         | 16570 | Asia_W_Europe     | H5b2        | H            | H             | 15             |
| 2463 | JQ704265.1           | JQ704265.1; H1a1a1; Asia_W_Europe; 16; A73G; A263G; C309CCT        | 16570 | Asia_W_Europe     | H1a1a1      | H            | H             | 16             |
| 2464 | JQ704266.1           | JQ704266.1; L1b1a15a; Africa_C; 83; A73G; T146C; T152C             | 16567 | Africa_C          | L1b1a15a    | L1           | L1            | 83             |
| 2465 | JQ704267.1           | JQ704267.1; H1o; Asia_W_Europe; 14; C150T; A263G; C315CC           | 16569 | Asia_W_Europe     | H1o         | H            | H             | 14             |
| 2466 | JQ704268.1           | JQ704268.1; U2e1d; Asia_S_W_Europe; 42; A73G; T152C; T195C         | 16573 | Asia_S_W_Europe   | U2e1d       | U            | U2            | 42             |
| 2467 | JQ704269.1           | JQ704269.1; H2a2a2; Asia_W_Europe; 5; T152C; A263G; C309CCT        | 16570 | Asia_W_Europe     | H2a2a2      | H            | H             | 5              |
| 2468 | JQ704270.1           | JQ704270.1; H6a1b4; Asia_W_Europe; 17; T239C; A263G; C315CC        | 16569 | Asia_W_Europe     | H6a1b4      | H            | H             | 17             |
| 2469 | JQ704271.1           | JQ704271.1; U5a1b; Asia_W_Europe_C; 25; A73G; A263G; C315CC        | 16569 | Asia_W_Europe_C   | U5a1b       | U            | U5            | 25             |
| 2470 | JQ704272.1           | JQ704272.1; H5s; Asia_W_Europe; 15; A263G; C309CCT; T310C          | 16571 | Asia_W_Europe     | H5s         | H            | H             | 15             |
| 2471 | JQ704273.1           | JQ704273.1; H4a1a1a1a; Asia_W_Europe; 22; A73G; C150T; A263G       | 16566 | Asia_W_Europe     | H4a1a1a1a   | H            | H             | 22             |
| 2472 | JQ704274.1           | JQ704274.1; H2; Asia_W_Europe; 11; A263G; C309CCCT; T310C          | 16571 | Asia_W_Europe     | H2          | H            | H             | 11             |
| 2473 | JQ704275.1           | JQ704275.1; H; Asia_W_Europe; 16; T131C; A263G; C309CCCT           | 16573 | Asia_W_Europe     | H           | H            | H             | 16             |
| 2474 | JQ704276.1           | JQ704276.1; A2ae; Asia_NE_America_N; 38; C64T; A73G; T146C         | 16568 | Asia_NE_America_N | A2ae        | A            | A             | 38             |
| 2475 | JQ704277.1           | JQ704277.1; H1q; Asia_W_Europe; 15; A263G; C315CC; A750G           | 16569 | Asia_W_Europe     | H1q         | H            | H             | 15             |
| 2476 | JQ704278.1           | JQ704278.1; H5a1j; Asia_W_Europe; 17; T152C; A263G; C309CCT        | 16568 | Asia_W_Europe     | H5a1j       | H            | H             | 17             |
| 2477 | JQ704279.1           | JQ704279.1; H1+16239; Asia_W_Europe; 11; T146C; A263G; C315CC      | 16569 | Asia_W_Europe     | H1+16239    | H            | H             | 11             |
| 2478 | JQ704280.1           | JQ704280.1; H11a4; Asia_W_Europe; 18; C151T; T195C; A263G          | 16572 | Asia_W_Europe     | H11a4       | H            | H             | 18             |
| 2479 | JQ704281.1           | JQ704281.1; H67a; Asia_W_Europe; 14; A263G; C309CCT; T310C         | 16570 | Asia_W_Europe     | H67a        | H            | H             | 14             |
| 2480 | JQ704282.1           | JQ704282.1; H1c1; Asia_W_Europe; 14; A263G; C309CCCT; T310C        | 16571 | Asia_W_Europe     | H1c1        | H            | H             | 14             |
| 2481 | JQ704283.1           | JQ704283.1; H4c1; Asia_W_Europe; 16; A73G; A263G; C315CC           | 16567 | Asia_W_Europe     | H4c1        | H            | H             | 16             |
| 2482 | JQ704284.1           | JQ704284.1; HV1b3b; Asia_W; 23; T152C; T195C; A263G                | 16569 | Asia_W            | HV1b3b      | HV           | HV            | 23             |
| 2483 | JQ704285.1           | JQ704285.1; H1ax; Asia_W_Europe; 15; A263G; C309CCT; T310C         | 16570 | Asia_W_Europe     | H1ax        | H            | H             | 15             |
| 2484 | JQ704286.1           | JQ704286.1; H11b1; Asia_W_Europe; 14; T195C; A263G; C315CC         | 16569 | Asia_W_Europe     | H11b1       | H            | H             | 14             |
| 2485 | JQ704287.1           | JQ704287.1; H10a1a; Asia_W_Europe; 13; A263G; C315CC; CA522d       | 16567 | Asia_W_Europe     | H10a1a      | H            | H             | 13             |
| 2486 | JQ704288.1           | JQ704288.1; H2a2a1; Asia_W_Europe; 5; C309CCT; T310C; A2220G       | 16570 | Asia_W_Europe     | H2a2a1      | H            | H             | 5              |
| 2487 | JQ704289.1           | JQ704289.1; H1b1; Asia_W_Europe; 15; T152C; A263G; C309CCT         | 16570 | Asia_W_Europe     | H1b1        | H            | H             | 15             |
| 2488 | JQ704290.1           | JQ704290.1; H44b; Asia_W_Europe; 16; T195C; A263G; C309CCT         | 16570 | Asia_W_Europe     | H44b        | H            | H             | 16             |
| 2489 | JQ704291.1           | JQ704291.1; H1ar1; Asia_W_Europe; 14; A183G; A263G; C309CCCT       | 16571 | Asia_W_Europe     | H1ar1       | H            | H             | 14             |
| 2490 | JQ704292.1           | JQ704292.1; H1e2; Asia_W_Europe; 12; A263G; C315CC; A750G          | 16569 | Asia_W_Europe     | H1e2        | H            | H             | 12             |
| 2491 | JQ704293.1           | JQ704293.1; H1ah2; Asia_W_Europe; 15; A263G; C315CC; A750G         | 16569 | Asia_W_Europe     | H1ah2       | H            | H             | 15             |
| 2492 | JQ704294.1           | JQ704294.1; H1c8; Asia_W_Europe; 13; A263G; C309CCT; T310C         | 16570 | Asia_W_Europe     | H1c8        | H            | H             | 13             |
| 2493 | JQ704295.1           | JQ704295.1; H10c1; Asia_W_Europe; 19; A249G; A263G; C309CCT        | 16570 | Asia_W_Europe     | H10c1       | H            | H             | 19             |
| 2494 | JQ704296.1           | JQ704296.1; H6a1a; Asia_W_Europe; 17; T239C; A263G; C315CC         | 16569 | Asia_W_Europe     | H6a1a       | H            | H             | 17             |
| 2495 | JQ704297.1           | JQ704297.1; H2a(H2a2a1); Asia_W_Europe; 5; C309CCCT; T310C; G5147A | 16571 | Asia_W_Europe     | H2a(H2a2a1) | H            | H             | 5              |
| 2496 | JQ704298.1           | JQ704298.1; H1f; Asia_W_Europe; 13; A263G; C309CCCT; T310C         | 16571 | Asia_W_Europe     | H1f         | H            | H             | 13             |
| 2497 | JQ704299.1           | JQ704299.1; H6a1a; Asia_W_Europe; 16; T239C; A263G; C309CCCT       | 16571 | Asia_W_Europe     | H6a1a       | H            | H             | 16             |
| 2498 | JQ704300.1           | JQ704300.1; H1; Asia_W_Europe; 10; A263G; C315CC; A750G            | 16569 | Asia_W_Europe     | H1          | H            | H             | 10             |
| 2499 | JQ704301.1           | JQ704301.1; H1a3c; Asia_W_Europe; 14; A73G; A263G; C315CC          | 16569 | Asia_W_Europe     | H1a3c       | H            | H             | 14             |
| 2500 | JQ704302.1           | JQ704302.1; U5b1e1; Asia_W_Europe_C; 31; A73G; T146C; C150T        | 16567 | Asia_W_Europe_C   | U5b1e1      | U            | U5            | 31             |
| 2501 | JQ704303.1           | JQ704303.1; H1af; Asia_W_Europe; 10; A263G; C315CC; A750G          | 16569 | Asia_W_Europe     | H1af        | H            | H             | 10             |

**Supplementary Table S3** Human mitochondrial database (hMITO DB v1.0) metadata

| Row  | Name (accession no.) | Description                                                        | Size  | Geo_Region      | Haplogroup    | Macro_Haplo | Macro_Haplo2 | Total Variants |
|------|----------------------|--------------------------------------------------------------------|-------|-----------------|---------------|-------------|--------------|----------------|
| 2502 | JQ704304.1           | JQ704304.1; H6a1a; Asia_W_Europe; 16; T239C; A263G; C309CCT        | 16570 | Asia_W_Europe   | H6a1a         | H           | H            | 16             |
| 2503 | JQ704305.1           | JQ704305.1; HV0+195; Asia_W; 15; T72C; T195C; A263G                | 16570 | Asia_W          | HV0+195       | HV          | HV           | 15             |
| 2504 | JQ704306.1           | JQ704306.1; J1c16; Asia_W; 33; A73G; T152C; G185A                  | 16569 | Asia_W          | J1c16         | J           | J            | 33             |
| 2505 | JQ704307.1           | JQ704307.1; H1n1a; Asia_W_Europe; 17; T146C; A263G; C309CCT        | 16572 | Asia_W_Europe   | H1n1a         | H           | H            | 17             |
| 2506 | JQ704308.1           | JQ704308.1; H5b1; Asia_W_Europe; 16; T146C; C150T; T195C           | 16570 | Asia_W_Europe   | H5b1          | H           | H            | 16             |
| 2507 | JQ704309.1           | JQ704309.1; H1b2; Asia_W_Europe; 17; C151T; A263G; C309CCCT        | 16571 | Asia_W_Europe   | H1b2          | H           | H            | 17             |
| 2508 | JQ704310.1           | JQ704310.1; H1c+152; Asia_W_Europe; 12; T152C; A263G; C315CC       | 16569 | Asia_W_Europe   | H1c+152       | H           | H            | 12             |
| 2509 | JQ704311.1           | JQ704311.1; H1e1a; Asia_W_Europe; 13; A263G; C315CC; A750G         | 16569 | Asia_W_Europe   | H1e1a         | H           | H            | 13             |
| 2510 | JQ704312.1           | JQ704312.1; H1a; Asia_W_Europe; 12; A73G; A263G; C309CCT           | 16570 | Asia_W_Europe   | H1a           | H           | H            | 12             |
| 2511 | JQ704313.1           | JQ704313.1; H13b2; Asia_W_Europe; 16; A263G; C309CCT; T310C        | 16568 | Asia_W_Europe   | H13b2         | H           | H            | 16             |
| 2512 | JQ704314.1           | JQ704314.1; H1c1; Asia_W_Europe; 12; A263G; C315CC; T477C          | 16569 | Asia_W_Europe   | H1c1          | H           | H            | 12             |
| 2513 | JQ704315.1           | JQ704315.1; H3; Asia_W_Europe; 12; A263G; C315CC; A750G            | 16569 | Asia_W_Europe   | H3            | H           | H            | 12             |
| 2514 | JQ704316.1           | JQ704316.1; H13a1a; Asia_W_Europe; 13; A263G; C309CCCT; T310C      | 16571 | Asia_W_Europe   | H13a1a        | H           | H            | 13             |
| 2515 | JQ704317.1           | JQ704317.1; H1a5; Asia_W_Europe; 15; A73G; A263G; C315CC           | 16569 | Asia_W_Europe   | H1a5          | H           | H            | 15             |
| 2516 | JQ704318.1           | JQ704318.1; H3q; Asia_W_Europe; 10; A263G; C315CC; A750G           | 16569 | Asia_W_Europe   | H3q           | H           | H            | 10             |
| 2517 | JQ704319.1           | JQ704319.1; T2b; Asia_W; 34; A73G; A200G; A263G                    | 16569 | Asia_W          | T2b           | T           | T            | 34             |
| 2518 | JQ704320.1           | JQ704320.1; K1a4a1; Asia_W; 37; A73G; T146C; A263G                 | 16571 | Asia_W          | K1a4a1        | K           | K            | 37             |
| 2519 | JQ704321.1           | JQ704321.1; U4a2a2; Asia_N_Europe_N; 28; A73G; T195C; A263G        | 16572 | Asia_N_Europe_N | U4a2a2        | U           | U4           | 28             |
| 2520 | JQ704322.1           | JQ704322.1; HV6; Asia_W; 15; A263G; C309CCCT; T310C                | 16571 | Asia_W          | HV6           | HV          | HV           | 15             |
| 2521 | JQ704323.1           | JQ704323.1; H1c1a; Asia_W_Europe; 15; A263G; C315CC; T477C         | 16569 | Asia_W_Europe   | H1c1a         | H           | H            | 15             |
| 2522 | JQ704324.1           | JQ704324.1; H5a1n; Asia_W_Europe; 15; T152C; A263G; C309CCT        | 16568 | Asia_W_Europe   | H5a1n         | H           | H            | 15             |
| 2523 | JQ704325.1           | JQ704325.1; H39c; Asia_W_Europe; 11; A263G; C309CCCT; T310C        | 16571 | Asia_W_Europe   | H39c          | H           | H            | 11             |
| 2524 | JQ704326.1           | JQ704326.1; U4c1; Asia_N_Europe_N; 37; A73G; C150T; T195C          | 16573 | Asia_N_Europe_N | U4c1          | U           | U4           | 37             |
| 2525 | JQ704327.1           | JQ704327.1; H1e2a; Asia_W_Europe; 14; A263G; C315CC; A750G         | 16569 | Asia_W_Europe   | H1e2a         | H           | H            | 14             |
| 2526 | JQ704328.1           | JQ704328.1; H3ao; Asia_W_Europe; 12; A93G; A263G; C309CCT          | 16570 | Asia_W_Europe   | H3ao          | H           | H            | 12             |
| 2527 | JQ704329.1           | JQ704329.1; H1c3; Asia_W_Europe; 15; T195C; A257G; A263G           | 16570 | Asia_W_Europe   | H1c3          | H           | H            | 15             |
| 2528 | JQ704330.1           | JQ704330.1; H27; Asia_W_Europe; 13; A263G; C309CCCT; T310C         | 16571 | Asia_W_Europe   | H27           | H           | H            | 13             |
| 2529 | JQ704331.1           | JQ704331.1; H27+16093; Asia_W_Europe; 13; A263G; C315CC; A750G     | 16569 | Asia_W_Europe   | H27+16093     | H           | H            | 13             |
| 2530 | JQ704332.1           | JQ704332.1; H5a1d; Asia_W_Europe; 15; A263G; C315CC; C456T         | 16567 | Asia_W_Europe   | H5a1d         | H           | H            | 15             |
| 2531 | JQ704333.1           | JQ704333.1; H6a1a2a; Asia_W_Europe; 19; C41T; T239C; A263G         | 16571 | Asia_W_Europe   | H6a1a2a       | H           | H            | 19             |
| 2532 | JQ704334.1           | JQ704334.1; H3+16311; Asia_W_Europe; 12; C194T; A263G; C315CC      | 16569 | Asia_W_Europe   | H3+16311      | H           | H            | 12             |
| 2533 | JQ704335.1           | JQ704335.1; U5b1d1a; Asia_W_Europe_C; 33; A73G; C150T; A263G       | 16572 | Asia_W_Europe_C | U5b1d1a       | U           | U5           | 33             |
| 2534 | JQ704336.1           | JQ704336.1; H1ao; Asia_W_Europe; 16; A93G; T146C; T152C            | 16569 | Asia_W_Europe   | H1ao          | H           | H            | 16             |
| 2535 | JQ704337.1           | JQ704337.1; H2a2a+(16235); Asia_W_Europe; 7; A263G; C309CCT; T310C | 16570 | Asia_W_Europe   | H2a2a+(16235) | H           | H            | 7              |
| 2536 | JQ704338.1           | JQ704338.1; H3g3; Asia_W_Europe; 14; T152C; A263G; C315CC          | 16569 | Asia_W_Europe   | H3g3          | H           | H            | 14             |
| 2537 | JQ704339.1           | JQ704339.1; H6a1a; Asia_W_Europe; 17; T239C; A263G; C309CCT        | 16570 | Asia_W_Europe   | H6a1a         | H           | H            | 17             |
| 2538 | JQ704340.1           | JQ704340.1; V24; Europe_S; 16; T72C; A263G; C315CC                 | 16569 | Europe_S        | V24           | V           | V            | 16             |
| 2539 | JQ704341.1           | JQ704341.1; H5h; Asia_W_Europe; 12; A263G; C315CC; C456T           | 16569 | Asia_W_Europe   | H5h           | H           | H            | 12             |
| 2540 | JQ704342.1           | JQ704342.1; V1b; Europe_S; 21; T72C; A263G; C309CCT                | 16570 | Europe_S        | V1b           | V           | V            | 21             |
| 2541 | JQ704343.1           | JQ704343.1; H1e2a; Asia_W_Europe; 13; A263G; C315CC; A750G         | 16569 | Asia_W_Europe   | H1e2a         | H           | H            | 13             |
| 2542 | JQ704344.1           | JQ704344.1; H18; Asia_W_Europe; 12; A263G; C315CC; A750G           | 16569 | Asia_W_Europe   | H18           | H           | H            | 12             |

**Supplementary Table S3** Human mitochondrial database (hMITO DB v1.0) metadata

| Row  | Name (accession no.) | Description                                                     | Size  | Geo_Region        | Haplogroup | Macro_Haplo | Macro_Haplo2 | Total Variants |
|------|----------------------|-----------------------------------------------------------------|-------|-------------------|------------|-------------|--------------|----------------|
| 2543 | JQ704345.1           | JQ704345.1; U4a1a3; Asia_N_Europe_N; 35; A73G; T152C; T195C     | 16573 | Asia_N_Europe_N   | U4a1a3     | U           | U4           | 35             |
| 2544 | JQ704346.1           | JQ704346.1; H2a2a1b; Asia_W_Europe; 2; A9299G; G16145A;         | 16568 | Asia_W_Europe     | H2a2a1b    | H           | H            | 2              |
| 2545 | JQ704347.1           | JQ704347.1; H5a1f; Asia_W_Europe; 14; A263G; T310C; C456T       | 16566 | Asia_W_Europe     | H5a1f      | H           | H            | 14             |
| 2546 | JQ704348.1           | JQ704348.1; H3a1a; Asia_W_Europe; 15; T152C; A263G; C309CCT     | 16570 | Asia_W_Europe     | H3a1a      | H           | H            | 15             |
| 2547 | JQ704349.1           | JQ704349.1; HV4a2b; Asia_W; 18; A93G; A263G; C309CCT            | 16570 | Asia_W            | HV4a2b     | HV          | HV           | 18             |
| 2548 | JQ704350.1           | JQ704350.1; A2+(64); Asia_NE_America_N; 35; C64T; A73G; T146C   | 16568 | Asia_NE_America_N | A2+(64)    | A           | A            | 35             |
| 2549 | JQ704351.1           | JQ704351.1; H13a1a1a; Asia_W_Europe; 17; T152C; A263G; C309CCT  | 16570 | Asia_W_Europe     | H13a1a1a   | H           | H            | 17             |
| 2550 | JQ704352.1           | JQ704352.1; H1c11; Asia_W_Europe; 13; A263G; C315CC; T477C      | 16568 | Asia_W_Europe     | H1c11      | H           | H            | 13             |
| 2551 | JQ704353.1           | JQ704353.1; H; Asia_W_Europe; 10; A263G; C315CC; A750G          | 16569 | Asia_W_Europe     | H          | H           | H            | 10             |
| 2552 | JQ704354.1           | JQ704354.1; H3; Asia_W_Europe; 14; G207A; A263G; C309CCT        | 16570 | Asia_W_Europe     | H3         | H           | H            | 14             |
| 2553 | JQ704355.1           | JQ704355.1; H3ap; Asia_W_Europe; 12; A263G; C309CCT; T310C      | 16569 | Asia_W_Europe     | H3ap       | H           | H            | 12             |
| 2554 | JQ704356.1           | JQ704356.1; H1c1a; Asia_W_Europe; 16; A263G; C315CC; T477C      | 16571 | Asia_W_Europe     | H1c1a      | H           | H            | 16             |
| 2555 | JQ704357.1           | JQ704357.1; H7d1; Asia_W_Europe; 13; A263G; C315CC; A750G       | 16569 | Asia_W_Europe     | H7d1       | H           | H            | 13             |
| 2556 | JQ704358.1           | JQ704358.1; H1j3; Asia_W_Europe; 11; A263G; C315CC; A750G       | 16569 | Asia_W_Europe     | H1j3       | H           | H            | 11             |
| 2557 | JQ704359.1           | JQ704359.1; H5a1+16093; Asia_W_Europe; 15; A263G; C315CC; C456T | 16567 | Asia_W_Europe     | H5a1+16093 | H           | H            | 15             |
| 2558 | JQ704360.1           | JQ704360.1; H7b; Asia_W_Europe; 12; A263G; C315CC; A750G        | 16569 | Asia_W_Europe     | H7b        | H           | H            | 12             |
| 2559 | JQ704361.1           | JQ704361.1; H2a2b1a1; Asia_W_Europe; 12; A263G; C309CCCT; T310C | 16571 | Asia_W_Europe     | H2a2b1a1   | H           | H            | 12             |
| 2560 | JQ704362.1           | JQ704362.1; H7a; Asia_W_Europe; 13; A263G; C309CCCT; T310C      | 16571 | Asia_W_Europe     | H7a        | H           | H            | 13             |
| 2561 | JQ704363.1           | JQ704363.1; H3m; Asia_W_Europe; 14; A263G; C315CC; C463T        | 16569 | Asia_W_Europe     | H3m        | H           | H            | 14             |
| 2562 | JQ704364.1           | JQ704364.1; H15a1a; Asia_W_Europe; 13; T55C; T57C; A263G        | 16569 | Asia_W_Europe     | H15a1a     | H           | H            | 13             |
| 2563 | JQ704365.1           | JQ704365.1; H17c; Asia_W_Europe; 13; A73G; A263G; C315CC        | 16569 | Asia_W_Europe     | H17c       | H           | H            | 13             |
| 2564 | JQ704366.1           | JQ704366.1; H1bw; Asia_W_Europe; 13; A263G; C309CCT; T310C      | 16570 | Asia_W_Europe     | H1bw       | H           | H            | 13             |
| 2565 | JQ704367.1           | JQ704367.1; H6a1b2; Asia_W_Europe; 20; T152C; T239C; A263G      | 16571 | Asia_W_Europe     | H6a1b2     | H           | H            | 20             |
| 2566 | JQ704368.1           | JQ704368.1; H1c; Asia_W_Europe; 16; A263G; C315CC; T477C        | 16567 | Asia_W_Europe     | H1c        | H           | H            | 16             |
| 2567 | JQ704369.1           | JQ704369.1; H1bb; Asia_W_Europe; 12; T152C; A263G; C315CC       | 16571 | Asia_W_Europe     | H1bb       | H           | H            | 12             |
| 2568 | JQ704370.1           | JQ704370.1; H1as2; Asia_W_Europe; 12; A263G; C309CCT; T310C     | 16570 | Asia_W_Europe     | H1as2      | H           | H            | 12             |
| 2569 | JQ704371.1           | JQ704371.1; H56c; Asia_W_Europe; 12; A263G; C309CCT; T310C      | 16570 | Asia_W_Europe     | H56c       | H           | H            | 12             |
| 2570 | JQ704372.1           | JQ704372.1; H5a3a; Asia_W_Europe; 21; A263G; C309CCT; T310C     | 16570 | Asia_W_Europe     | H5a3a      | H           | H            | 21             |
| 2571 | JQ704373.1           | JQ704373.1; H1q1; Asia_W_Europe; 12; A263G; C315CC; A750G       | 16569 | Asia_W_Europe     | H1q1       | H           | H            | 12             |
| 2572 | JQ704374.1           | JQ704374.1; H4a1a1; Asia_W_Europe; 15; A263G; C315CC; A750G     | 16569 | Asia_W_Europe     | H4a1a1     | H           | H            | 15             |
| 2573 | JQ704375.1           | JQ704375.1; H13b1a; Asia_W_Europe; 13; A263G; C315CC; A750G     | 16569 | Asia_W_Europe     | H13b1a     | H           | H            | 13             |
| 2574 | JQ704376.1           | JQ704376.1; H6a1b2a; Asia_W_Europe; 18; T239C; A263G; C309CCT   | 16570 | Asia_W_Europe     | H6a1b2a    | H           | H            | 18             |
| 2575 | JQ704377.1           | JQ704377.1; H7f; Asia_W_Europe; 10; A263G; C315CC; A750G        | 16569 | Asia_W_Europe     | H7f        | H           | H            | 10             |
| 2576 | JQ704378.1           | JQ704378.1; H1c4b; Asia_W_Europe; 12; A263G; C315CC; T477C      | 16569 | Asia_W_Europe     | H1c4b      | H           | H            | 12             |
| 2577 | JQ704379.1           | JQ704379.1; H7a1; Asia_W_Europe; 14; A263G; C309CCT; T310C      | 16570 | Asia_W_Europe     | H7a1       | H           | H            | 14             |
| 2578 | JQ704380.1           | JQ704380.1; H6a1a9; Asia_W_Europe; 18; T204C; T239C; A263G      | 16570 | Asia_W_Europe     | H6a1a9     | H           | H            | 18             |
| 2579 | JQ704381.1           | JQ704381.1; H1ag1; Asia_W_Europe; 15; T152C; A263G; A291AA      | 16570 | Asia_W_Europe     | H1ag1      | H           | H            | 15             |
| 2580 | JQ704382.1           | JQ704382.1; H1c2; Asia_W_Europe; 13; A263G; C309CCT; T310C      | 16570 | Asia_W_Europe     | H1c2       | H           | H            | 13             |
| 2581 | JQ704383.1           | JQ704383.1; H3aq; Asia_W_Europe; 11; A263G; C315CC; A750G       | 16569 | Asia_W_Europe     | H3aq       | H           | H            | 11             |
| 2582 | JQ704384.1           | JQ704384.1; J1c2b; Asia_W; 33; A73G; T152C; G185A               | 16568 | Asia_W            | J1c2b      | J           | J            | 33             |
| 2583 | JQ704385.1           | JQ704385.1; H10e; Asia_W_Europe; 12; C150T; A263G; C309CCT      | 16570 | Asia_W_Europe     | H10e       | H           | H            | 12             |

**Supplementary Table S3** Human mitochondrial database (hMITO DB v1.0) metadata

| Row  | Name (accession no.) | Description                                                     | Size  | Geo_Region       | Haplogroup | Macro_ Haplo | Macro_ Haplo2 | Total Variants |
|------|----------------------|-----------------------------------------------------------------|-------|------------------|------------|--------------|---------------|----------------|
| 2584 | JQ704386.1           | JQ704386.1; H5j; Asia_W_Europe; 17; A263G; C309CCCT; T310C      | 16571 | Asia_W_Europe    | H5j        | H            | H             | 17             |
| 2585 | JQ704387.1           | JQ704387.1; H10e1a; Asia_W_Europe; 14; A263G; C309CCT; T310C    | 16570 | Asia_W_Europe    | H10e1a     | H            | H             | 14             |
| 2586 | JQ704388.1           | JQ704388.1; H; Asia_W_Europe; 12; A263G; C315CC; A750G          | 16569 | Asia_W_Europe    | H          | H            | H             | 12             |
| 2587 | JQ704389.1           | JQ704389.1; H30b; Asia_W_Europe; 15; A263G; C315CC; A750G       | 16569 | Asia_W_Europe    | H30b       | H            | H             | 15             |
| 2588 | JQ704390.1           | JQ704390.1; H6a1a; Asia_W_Europe; 16; T239C; A263G; C309CCT     | 16570 | Asia_W_Europe    | H6a1a      | H            | H             | 16             |
| 2589 | JQ704391.1           | JQ704391.1; H1; Asia_W_Europe; 14; A263G; C309CCT; T310C        | 16570 | Asia_W_Europe    | H1         | H            | H             | 14             |
| 2590 | JQ704392.1           | JQ704392.1; H1e4; Asia_W_Europe; 13; A263G; C315CC; A750G       | 16569 | Asia_W_Europe    | H1e4       | H            | H             | 13             |
| 2591 | JQ704393.1           | JQ704393.1; H6a1a; Asia_W_Europe; 18; T239C; A263G; C309CCT     | 16570 | Asia_W_Europe    | H6a1a      | H            | H             | 18             |
| 2592 | JQ704394.1           | JQ704394.1; H93; Asia_W_Europe; 9; A263G; C315CC; A750G         | 16569 | Asia_W_Europe    | H93        | H            | H             | 9              |
| 2593 | JQ704395.1           | JQ704395.1; H11a2a; Asia_W_Europe; 17; T195C; A263G; C315CC     | 16569 | Asia_W_Europe    | H11a2a     | H            | H             | 17             |
| 2594 | JQ704396.1           | JQ704396.1; H5a7; Asia_W_Europe; 13; A263G; C309CCT; T310C      | 16570 | Asia_W_Europe    | H5a7       | H            | H             | 13             |
| 2595 | JQ704397.1           | JQ704397.1; H5a1; Asia_W_Europe; 14; A263G; C309CCCT; T310C     | 16571 | Asia_W_Europe    | H5a1       | H            | H             | 14             |
| 2596 | JQ704398.1           | JQ704398.1; H1j4; Asia_W_Europe; 13; A263G; C309CCT; T310C      | 16570 | Asia_W_Europe    | H1j4       | H            | H             | 13             |
| 2597 | JQ704399.1           | JQ704399.1; H5a1; Asia_W_Europe; 14; A263G; C309CCT; T310C      | 16568 | Asia_W_Europe    | H5a1       | H            | H             | 14             |
| 2598 | JQ704400.1           | JQ704400.1; H1be; Asia_W_Europe; 14; A263G; C309CCT; T310C      | 16570 | Asia_W_Europe    | H1be       | H            | H             | 14             |
| 2599 | JQ704401.1           | JQ704401.1; H5b1; Asia_W_Europe; 17; T146C; T152C; T195C        | 16570 | Asia_W_Europe    | H5b1       | H            | H             | 17             |
| 2600 | JQ704402.1           | JQ704402.1; H1b; Asia_W_Europe; 13; A263G; C315CC; A750G        | 16569 | Asia_W_Europe    | H1b        | H            | H             | 13             |
| 2601 | JQ704403.1           | JQ704403.1; H28a; Asia_W_Europe; 12; C186A; A263G; C315CC       | 16569 | Asia_W_Europe    | H28a       | H            | H             | 12             |
| 2602 | JQ704404.1           | JQ704404.1; H17a1; Asia_W_Europe; 18; A263G; C309CCCT; T310C    | 16571 | Asia_W_Europe    | H17a1      | H            | H             | 18             |
| 2603 | JQ704405.1           | JQ704405.1; V11; Europe_S; 18; T72C; A263G; C309CCCT            | 16571 | Europe_S         | V11        | V            | V             | 18             |
| 2604 | JQ704406.1           | JQ704406.1; V7a; Europe_S; 17; T72C; A93G; T195C                | 16569 | Europe_S         | V7a        | V            | V             | 17             |
| 2605 | JQ704407.1           | JQ704407.1; H1b1+16362; Asia_W_Europe; 15; T152C; A263G; C315CC | 16567 | Asia_W_Europe    | H1b1+16362 | H            | H             | 15             |
| 2606 | JQ704408.1           | JQ704408.1; H4a1a1a3; Asia_W_Europe; 21; A73G; T146C; A263G     | 16567 | Asia_W_Europe    | H4a1a1a3   | H            | H             | 21             |
| 2607 | JQ704409.1           | JQ704409.1; H16; Asia_W_Europe; 10; A263G; C309CCT; T310C       | 16570 | Asia_W_Europe    | H16        | H            | H             | 10             |
| 2608 | JQ704410.1           | JQ704410.1; H1ah1; Asia_W_Europe; 18; A263G; C309CCCT; T310C    | 16571 | Asia_W_Europe    | H1ah1      | H            | H             | 18             |
| 2609 | JQ704411.1           | JQ704411.1; H1aw; Asia_W_Europe; 14; A263G; C309CCCT; T310C     | 16571 | Asia_W_Europe    | H1aw       | H            | H             | 14             |
| 2610 | JQ704412.1           | JQ704412.1; H1ae1; Asia_W_Europe; 13; A263G; C315CC; A750G      | 16569 | Asia_W_Europe    | H1ae1      | H            | H             | 13             |
| 2611 | JQ704413.1           | JQ704413.1; H1a1a; Asia_W_Europe; 16; A73G; A263G; C315CCC      | 16570 | Asia_W_Europe    | H1a1a      | H            | H             | 16             |
| 2612 | JQ704414.1           | JQ704414.1; H1cj; Asia_W_Europe; 16; A263G; C309CCT; T310C      | 16570 | Asia_W_Europe    | H1cj       | H            | H             | 16             |
| 2613 | JQ704415.1           | JQ704415.1; H5a2; Asia_W_Europe; 13; A263G; C309CCT; T310C      | 16570 | Asia_W_Europe    | H5a2       | H            | H             | 13             |
| 2614 | JQ704416.1           | JQ704416.1; H28a1; Asia_W_Europe; 15; C186A; A263G; C309CCT     | 16570 | Asia_W_Europe    | H28a1      | H            | H             | 15             |
| 2615 | JQ704417.1           | JQ704417.1; H6a1a2a; Asia_W_Europe; 21; C41T; T146C; T152C      | 16571 | Asia_W_Europe    | H6a1a2a    | H            | H             | 21             |
| 2616 | JQ704418.1           | JQ704418.1; H1e1a6; Asia_W_Europe; 15; C150T; A263G; C315CC     | 16569 | Asia_W_Europe    | H1e1a6     | H            | H             | 15             |
| 2617 | JQ704419.1           | JQ704419.1; H1bt1; Asia_W_Europe; 13; A263G; C315CC; A750G      | 16569 | Asia_W_Europe    | H1bt1      | H            | H             | 13             |
| 2618 | JQ704420.1           | JQ704420.1; U3a1c1; Africa_NE_Asia_W; 32; A73G; C150T; A263G    | 16569 | Africa_NE_Asia_W | U3a1c1     | U            | U3            | 32             |
| 2619 | JQ704421.1           | JQ704421.1; H; Asia_W_Europe; 10; A263G; C315CC; A750G          | 16569 | Asia_W_Europe    | H          | H            | H             | 10             |
| 2620 | JQ704422.1           | JQ704422.1; H3; Asia_W_Europe; 11; A263G; C315CC; A750G         | 16569 | Asia_W_Europe    | H3         | H            | H             | 11             |
| 2621 | JQ704423.1           | JQ704423.1; H5d; Asia_W_Europe; 11; A263G; C315CC; C456T        | 16569 | Asia_W_Europe    | H5d        | H            | H             | 11             |
| 2622 | JQ704424.1           | JQ704424.1; H1be; Asia_W_Europe; 13; A263G; C309CCT; T310C      | 16570 | Asia_W_Europe    | H1be       | H            | H             | 13             |
| 2623 | JQ704425.1           | JQ704425.1; H2a1; Asia_W_Europe; 8; A263G; C315CC; A750G        | 16569 | Asia_W_Europe    | H2a1       | H            | H             | 8              |
| 2624 | JQ704426.1           | JQ704426.1; T2f3; Asia_W; 36; A73G; A263G; C309CCT              | 16561 | Asia_W           | T2f3       | T            | T             | 36             |



**Supplementary Table S3** Human mitochondrial database (hMITO DB v1.0) metadata

| Row  | Name (accession no.) | Description                                                      | Size  | Geo_Region        | Haplogroup  | Macro_Haplo | Macro_Haplo2 | Total Variants |
|------|----------------------|------------------------------------------------------------------|-------|-------------------|-------------|-------------|--------------|----------------|
| 2625 | JQ704427.1           | JQ704427.1; H11a2a2; Asia_W_Europe; 20; T152C; T195C; A263G      | 16569 | Asia_W_Europe     | H11a2a2     | H           | H            | 20             |
| 2626 | JQ704428.1           | JQ704428.1; H7b6; Asia_W_Europe; 12; A263G; C309CCT; T310C       | 16570 | Asia_W_Europe     | H7b6        | H           | H            | 12             |
| 2627 | JQ704429.1           | JQ704429.1; H1ao; Asia_W_Europe; 14; A93G; T146C; A263G          | 16570 | Asia_W_Europe     | H1ao        | H           | H            | 14             |
| 2628 | JQ704430.1           | JQ704430.1; H3a1; Asia_W_Europe; 16; T152C; A263G; C309CCCT      | 16571 | Asia_W_Europe     | H3a1        | H           | H            | 16             |
| 2629 | JQ704431.1           | JQ704431.1; H1c1; Asia_W_Europe; 13; A215G; A263G; C315CC        | 16569 | Asia_W_Europe     | H1c1        | H           | H            | 13             |
| 2630 | JQ704432.1           | JQ704432.1; J1c2f; Asia_W; 30; A73G; G185A; A188G                | 16569 | Asia_W            | J1c2f       | J           | J            | 30             |
| 2631 | JQ704433.1           | JQ704433.1; H1ae1; Asia_W_Europe; 12; A263G; C315CC; A750G       | 16569 | Asia_W_Europe     | H1ae1       | H           | H            | 12             |
| 2632 | JQ704434.1           | JQ704434.1; H2a1+146; Asia_W_Europe; 8; T146C; A263G; C315CC     | 16569 | Asia_W_Europe     | H2a1+146    | H           | H            | 8              |
| 2633 | JQ704435.1           | JQ704435.1; H1bi; Asia_W_Europe; 13; A263G; C309CCT; T310C       | 16570 | Asia_W_Europe     | H1bi        | H           | H            | 13             |
| 2634 | JQ704436.1           | JQ704436.1; H3h3a; Asia_W_Europe; 13; A263G; C315CC; A750G       | 16569 | Asia_W_Europe     | H3h3a       | H           | H            | 13             |
| 2635 | JQ704437.1           | JQ704437.1; H5; Asia_W_Europe; 13; A263G; C309CCT; T310C         | 16570 | Asia_W_Europe     | H5          | H           | H            | 13             |
| 2636 | JQ704438.1           | JQ704438.1; H1c2a; Asia_W_Europe; 12; A263G; C315CC; T477C       | 16569 | Asia_W_Europe     | H1c2a       | H           | H            | 12             |
| 2637 | JQ704439.1           | JQ704439.1; H1c1; Asia_W_Europe; 14; A263G; C309CCT; T310C       | 16570 | Asia_W_Europe     | H1c1        | H           | H            | 14             |
| 2638 | JQ704440.1           | JQ704440.1; U3a3; Africa_NE_Asia_W; 35; A73G; C150T; T152C       | 16569 | Africa_NE_Asia_W  | U3a3        | U           | U3           | 35             |
| 2639 | JQ704441.1           | JQ704441.1; HV0a; Asia_W; 19; T72C; A263G; C309CCT               | 16570 | Asia_W            | HV0a        | HV          | HV           | 19             |
| 2640 | JQ704442.1           | JQ704442.1; H5a1b; Asia_W_Europe; 14; A263G; C315CC; C456T       | 16567 | Asia_W_Europe     | H5a1b       | H           | H            | 14             |
| 2641 | JQ704443.1           | JQ704443.1; H18; Asia_W_Europe; 10; A263G; C315CC; A750G         | 16569 | Asia_W_Europe     | H18         | H           | H            | 10             |
| 2642 | JQ704444.1           | JQ704444.1; H1j; Asia_W_Europe; 12; T152C; A263G; C315CC         | 16569 | Asia_W_Europe     | H1j         | H           | H            | 12             |
| 2643 | JQ704445.1           | JQ704445.1; HV4a1; Asia_W; 17; A263G; C309CCT; T310C             | 16570 | Asia_W            | HV4a1       | HV          | HV           | 17             |
| 2644 | JQ704446.1           | JQ704446.1; H1b1+16362; Asia_W_Europe; 16; T195C; A263G; C315CC  | 16567 | Asia_W_Europe     | H1b1+16362  | H           | H            | 16             |
| 2645 | JQ704447.1           | JQ704447.1; H1+16239; Asia_W_Europe; 10; A263G; C315CC; A750G    | 16569 | Asia_W_Europe     | H1+16239    | H           | H            | 10             |
| 2646 | JQ704448.1           | JQ704448.1; H1ag1; Asia_W_Europe; 13; A263G; C315CC; A750G       | 16569 | Asia_W_Europe     | H1ag1       | H           | H            | 13             |
| 2647 | JQ704449.1           | JQ704449.1; H3k1a; Asia_W_Europe; 16; T152C; A263G; C309CCT      | 16570 | Asia_W_Europe     | H3k1a       | H           | H            | 16             |
| 2648 | JQ704450.1           | JQ704450.1; A2ae; Asia_NE_America_N; 38; C64T; A73G; T146C       | 16568 | Asia_NE_America_N | A2ae        | A           | A            | 38             |
| 2649 | JQ704451.1           | JQ704451.1; H26a1; Asia_W_Europe; 12; A263G; C315CC; A750G       | 16569 | Asia_W_Europe     | H26a1       | H           | H            | 12             |
| 2650 | JQ704452.1           | JQ704452.1; H10a1a1; Asia_W_Europe; 15; A263G; C309CCT; T310C    | 16570 | Asia_W_Europe     | H10a1a1     | H           | H            | 15             |
| 2651 | JQ704453.1           | JQ704453.1; H6a1b2; Asia_W_Europe; 17; T239C; A263G; C315CC      | 16569 | Asia_W_Europe     | H6a1b2      | H           | H            | 17             |
| 2652 | JQ704454.1           | JQ704454.1; H1b; Asia_W_Europe; 15; A263G; C315CC; A750G         | 16569 | Asia_W_Europe     | H1b         | H           | H            | 15             |
| 2653 | JQ704455.1           | JQ704455.1; H3g2; Asia_W_Europe; 13; T152C; A263G; C315CC        | 16571 | Asia_W_Europe     | H3g2        | H           | H            | 13             |
| 2654 | JQ704456.1           | JQ704456.1; H3b1b; Asia_W_Europe; 16; A153G; A263G; C309CCCT     | 16571 | Asia_W_Europe     | H3b1b       | H           | H            | 16             |
| 2655 | JQ704457.1           | JQ704457.1; H17c; Asia_W_Europe; 13; A73G; A263G; C315CC         | 16569 | Asia_W_Europe     | H17c        | H           | H            | 13             |
| 2656 | JQ704458.1           | JQ704458.1; H6a1b4; Asia_W_Europe; 18; T152C; T239C; A263G       | 16569 | Asia_W_Europe     | H6a1b4      | H           | H            | 18             |
| 2657 | JQ704459.1           | JQ704459.1; H1m1; Asia_W_Europe; 15; T146C; A263G; C315CC        | 16569 | Asia_W_Europe     | H1m1        | H           | H            | 15             |
| 2658 | JQ704460.1           | JQ704460.1; H55b; Asia_W_Europe; 13; A153G; A263G; C309CCCT      | 16571 | Asia_W_Europe     | H55b        | H           | H            | 13             |
| 2659 | JQ704461.1           | JQ704461.1; H39a1; Asia_W_Europe; 13; A263G; C309CCT; T310C      | 16570 | Asia_W_Europe     | H39a1       | H           | H            | 13             |
| 2660 | JQ704462.1           | JQ704462.1; H1j; Asia_W_Europe; 13; A263G; C315CC; A750G         | 16569 | Asia_W_Europe     | H1j         | H           | H            | 13             |
| 2661 | JQ704463.1           | JQ704463.1; HV2a1; Asia_W; 27; A73G; T152C; T195C                | 16572 | Asia_W            | HV2a1       | HV          | HV           | 27             |
| 2662 | JQ704464.1           | JQ704464.1; H1e1a+16278; Asia_W_Europe; 16; A263G; C315CC; A750G | 16569 | Asia_W_Europe     | H1e1a+16278 | H           | H            | 16             |
| 2663 | JQ704465.1           | JQ704465.1; H1ch; Asia_W_Europe; 15; A263G; C309CCT; T310C       | 16570 | Asia_W_Europe     | H1ch        | H           | H            | 15             |
| 2664 | JQ704466.1           | JQ704466.1; H1at1a; Asia_W_Europe; 15; A263G; C309CCCT; T310C    | 16571 | Asia_W_Europe     | H1at1a      | H           | H            | 15             |
| 2665 | JQ704467.1           | JQ704467.1; H5a+152; Asia_W_Europe; 14; T152C; G207A; A263G      | 16570 | Asia_W_Europe     | H5a+152     | H           | H            | 14             |

**Supplementary Table S3** Human mitochondrial database (hMITO DB v1.0) metadata

| Row  | Name (accession no.) | Description                                                     | Size  | Geo_Region    | Haplogroup  | Macro_ Haplo | Macro_ Haplo2 | Total Variants |
|------|----------------------|-----------------------------------------------------------------|-------|---------------|-------------|--------------|---------------|----------------|
| 2666 | JQ704468.1           | JQ704468.1; V16; Europe_S; 15; T72C; A263G; C315CC              | 16569 | Europe_S      | V16         | V            | V             | 15             |
| 2667 | JQ704469.1           | JQ704469.1; H6a1a8a; Asia_W_Europe; 19; T239C; A263G; C309CCT   | 16570 | Asia_W_Europe | H6a1a8a     | H            | H             | 19             |
| 2668 | JQ704470.1           | JQ704470.1; H1+16239; Asia_W_Europe; 10; A263G; C315CC; A750G   | 16569 | Asia_W_Europe | H1+16239    | H            | H             | 10             |
| 2669 | JQ704471.1           | JQ704471.1; H4a1; Asia_W_Europe; 19; A263G; C315CC; CA522d      | 16567 | Asia_W_Europe | H4a1        | H            | H             | 19             |
| 2670 | JQ704472.1           | JQ704472.1; H6a1a4; Asia_W_Europe; 19; A93G; T239C; A263G       | 16571 | Asia_W_Europe | H6a1a4      | H            | H             | 19             |
| 2671 | JQ704473.1           | JQ704473.1; H7c; Asia_W_Europe; 13; A263G; C315CC; CA522d       | 16567 | Asia_W_Europe | H7c         | H            | H             | 13             |
| 2672 | JQ704474.1           | JQ704474.1; H6a1b2; Asia_W_Europe; 17; T239C; A263G; C309CCCT   | 16571 | Asia_W_Europe | H6a1b2      | H            | H             | 17             |
| 2673 | JQ704475.1           | JQ704475.1; H13b1b; Asia_W_Europe; 18; A200G; A263G; C309CCCT   | 16571 | Asia_W_Europe | H13b1b      | H            | H             | 18             |
| 2674 | JQ704476.1           | JQ704476.1; H6a1b3b; Asia_W_Europe; 22; T204C; G207A; T239C     | 16571 | Asia_W_Europe | H6a1b3b     | H            | H             | 22             |
| 2675 | JQ704477.1           | JQ704477.1; H3au; Asia_W_Europe; 11; A263G; C315CC; A750G       | 16569 | Asia_W_Europe | H3au        | H            | H             | 11             |
| 2676 | JQ704478.1           | JQ704478.1; H2a2a1; Asia_W_Europe; 7; C315CC; C2225T; C9245G    | 16569 | Asia_W_Europe | H2a2a1      | H            | H             | 7              |
| 2677 | JQ704479.1           | JQ704479.1; H6a1a; Asia_W_Europe; 14; T239C; A263G; C309CCT     | 16570 | Asia_W_Europe | H6a1a       | H            | H             | 14             |
| 2678 | JQ704480.1           | JQ704480.1; H39; Asia_W_Europe; 11; A263G; C309CCCT; T310C      | 16571 | Asia_W_Europe | H39         | H            | H             | 11             |
| 2679 | JQ704481.1           | JQ704481.1; H1; Asia_W_Europe; 13; A263G; C309CCT; T310C        | 16570 | Asia_W_Europe | H1          | H            | H             | 13             |
| 2680 | JQ704482.1           | JQ704482.1; H3ak; Asia_W_Europe; 15; A73G; G143A; A263G         | 16569 | Asia_W_Europe | H3ak        | H            | H             | 15             |
| 2681 | JQ704483.1           | JQ704483.1; H13a1a1; Asia_W_Europe; 17; C150T; A263G; T310C     | 16569 | Asia_W_Europe | H13a1a1     | H            | H             | 17             |
| 2682 | JQ704484.1           | JQ704484.1; H3h4; Asia_W_Europe; 15; T146C; T217C; A263G        | 16569 | Asia_W_Europe | H3h4        | H            | H             | 15             |
| 2683 | JQ704485.1           | JQ704485.1; H1ag1; Asia_W_Europe; 14; A263G; C309CCT; T310C     | 16570 | Asia_W_Europe | H1ag1       | H            | H             | 14             |
| 2684 | JQ704486.1           | JQ704486.1; H1b5; Asia_W_Europe; 16; A263G; C315CC; A750G       | 16569 | Asia_W_Europe | H1b5        | H            | H             | 16             |
| 2685 | JQ704487.1           | JQ704487.1; H1c1; Asia_W_Europe; 13; A263G; C315CC; T477C       | 16569 | Asia_W_Europe | H1c1        | H            | H             | 13             |
| 2686 | JQ704488.1           | JQ704488.1; H2a1+146; Asia_W_Europe; 9; T146C; A263G; C309CC    | 16569 | Asia_W_Europe | H2a1+146    | H            | H             | 9              |
| 2687 | JQ704489.1           | JQ704489.1; H6a1a; Asia_W_Europe; 18; T239C; A263G; C309CCT     | 16570 | Asia_W_Europe | H6a1a       | H            | H             | 18             |
| 2688 | JQ704490.1           | JQ704490.1; H3p; Asia_W_Europe; 10; A263G; C315CC; A750G        | 16569 | Asia_W_Europe | H3p         | H            | H             | 10             |
| 2689 | JQ704491.1           | JQ704491.1; H63; Asia_W_Europe; 12; A263G; C309CCCT; T310C      | 16571 | Asia_W_Europe | H63         | H            | H             | 12             |
| 2690 | JQ704492.1           | JQ704492.1; H2a2b; Asia_W_Europe; 11; A263G; C309CCT; T310C     | 16570 | Asia_W_Europe | H2a2b       | H            | H             | 11             |
| 2691 | JQ704493.1           | JQ704493.1; H60a; Asia_W_Europe; 13; A263G; C315CC; T466C       | 16569 | Asia_W_Europe | H60a        | H            | H             | 13             |
| 2692 | JQ704494.1           | JQ704494.1; H10e1a; Asia_W_Europe; 15; A263G; C309CCT; T310C    | 16570 | Asia_W_Europe | H10e1a      | H            | H             | 15             |
| 2693 | JQ704495.1           | JQ704495.1; H6a1b2; Asia_W_Europe; 18; T239C; A263G; C309CCCT   | 16571 | Asia_W_Europe | H6a1b2      | H            | H             | 18             |
| 2694 | JQ704496.1           | JQ704496.1; H2c1; Asia_W_Europe; 16; C194T; G205A; A263G        | 16570 | Asia_W_Europe | H2c1        | H            | H             | 16             |
| 2695 | JQ704497.1           | JQ704497.1; H10+(16093); Asia_W_Europe; 14; A93G; A263G; C315CC | 16567 | Asia_W_Europe | H10+(16093) | H            | H             | 14             |
| 2696 | JQ704498.1           | JQ704498.1; H5d; Asia_W_Europe; 10; T131C; A263G; C456T         | 16568 | Asia_W_Europe | H5d         | H            | H             | 10             |
| 2697 | JQ704499.1           | JQ704499.1; H2c1; Asia_W_Europe; 16; C194T; G205A; A263G        | 16568 | Asia_W_Europe | H2c1        | H            | H             | 16             |
| 2698 | JQ704500.1           | JQ704500.1; H41a; Asia_W_Europe; 19; C262T; A263G; C309CCT      | 16570 | Asia_W_Europe | H41a        | H            | H             | 19             |
| 2699 | JQ704501.1           | JQ704501.1; H1e1a; Asia_W_Europe; 12; A263G; C315CC; A750G      | 16569 | Asia_W_Europe | H1e1a       | H            | H             | 12             |
| 2700 | JQ704502.1           | JQ704502.1; H1a3a; Asia_W_Europe; 15; A73G; A263G; C309CCCT     | 16571 | Asia_W_Europe | H1a3a       | H            | H             | 15             |
| 2701 | JQ704503.1           | JQ704503.1; H2c; Asia_W_Europe; 13; T152C; A263G; C315CC        | 16567 | Asia_W_Europe | H2c         | H            | H             | 13             |
| 2702 | JQ704504.1           | JQ704504.1; H15a1; Asia_W_Europe; 16; T55C; T57C; A263G         | 16570 | Asia_W_Europe | H15a1       | H            | H             | 16             |
| 2703 | JQ704505.1           | JQ704505.1; T2b; Asia_W; 35; A73G; A263G; C315CC                | 16569 | Asia_W        | T2b         | T            | T             | 35             |
| 2704 | JQ704506.1           | JQ704506.1; H7d1; Asia_W_Europe; 14; A263G; C315CC; A750G       | 16569 | Asia_W_Europe | H7d1        | H            | H             | 14             |
| 2705 | JQ704507.1           | JQ704507.1; H1a; Asia_W_Europe; 14; A73G; G185A; A263G          | 16570 | Asia_W_Europe | H1a         | H            | H             | 14             |
| 2706 | JQ704508.1           | JQ704508.1; K1a10a; Asia_W; 35; A73G; T195C; A263G              | 16573 | Asia_W        | K1a10a      | K            | K             | 35             |

**Supplementary Table S3** Human mitochondrial database (hMITO DB v1.0) metadata

| Row  | Name (accession no.) | Description                                                     | Size  | Geo_Region       | Haplogroup | Macro_ Haplo | Macro_ Haplo2 | Total Variants |
|------|----------------------|-----------------------------------------------------------------|-------|------------------|------------|--------------|---------------|----------------|
| 2707 | JQ704509.1           | JQ704509.1; H1ae3a; Asia_W_Europe; 15; A263G; C309CCT; T310C    | 16570 | Asia_W_Europe    | H1ae3a     | H            | H             | 15             |
| 2708 | JQ704510.1           | JQ704510.1; H31a; Asia_W_Europe; 15; T72G; T146C; T195C         | 16570 | Asia_W_Europe    | H31a       | H            | H             | 15             |
| 2709 | JQ704511.1           | JQ704511.1; H1+16189; Asia_W_Europe; 12; T152C; A263G; C309CCT  | 16570 | Asia_W_Europe    | H1+16189   | H            | H             | 12             |
| 2710 | JQ704512.1           | JQ704512.1; H6a1b3; Asia_W_Europe; 24; T204C; T239C; A263G      | 16570 | Asia_W_Europe    | H6a1b3     | H            | H             | 24             |
| 2711 | JQ704513.1           | JQ704513.1; H1ab1; Asia_W_Europe; 16; A263G; C309CCT; T310C     | 16570 | Asia_W_Europe    | H1ab1      | H            | H             | 16             |
| 2712 | JQ704514.1           | JQ704514.1; V19; Europe_S; 19; T72C; C150T; A263G               | 16570 | Europe_S         | V19        | V            | V             | 19             |
| 2713 | JQ704515.1           | JQ704515.1; H6a2; Asia_W_Europe; 16; C150T; T152C; T239C        | 16569 | Asia_W_Europe    | H6a2       | H            | H             | 16             |
| 2714 | JQ704516.1           | JQ704516.1; H1+16189; Asia_W_Europe; 12; A263G; C309CCCT; T310C | 16571 | Asia_W_Europe    | H1+16189   | H            | H             | 12             |
| 2715 | JQ704517.1           | JQ704517.1; U5b1b1e; Asia_W_Europe_C; 31; A73G; C150T; T152C    | 16570 | Asia_W_Europe_C  | U5b1b1e    | U            | U5            | 31             |
| 2716 | JQ704518.1           | JQ704518.1; H7a1a; Asia_W_Europe; 20; A93G; A263G; C315CC       | 16567 | Asia_W_Europe    | H7a1a      | H            | H             | 20             |
| 2717 | JQ704519.1           | JQ704519.1; H1g1; Asia_W_Europe; 15; A200G; A263G; C315CC       | 16569 | Asia_W_Europe    | H1g1       | H            | H             | 15             |
| 2718 | JQ704520.1           | JQ704520.1; H2a2a1f; Asia_W_Europe; 2; A93G; C315CC;            | 16569 | Asia_W_Europe    | H2a2a1f    | H            | H             | 2              |
| 2719 | JQ704521.1           | JQ704521.1; H76a; Asia_W_Europe; 14; T152C; A263G; C309CCT      | 16570 | Asia_W_Europe    | H76a       | H            | H             | 14             |
| 2720 | JQ704522.1           | JQ704522.1; H1c1; Asia_W_Europe; 14; A263G; C315CC; T477C       | 16569 | Asia_W_Europe    | H1c1       | H            | H             | 14             |
| 2721 | JQ704523.1           | JQ704523.1; J2b1a6; Asia_W; 37; A73G; C150T; A263G              | 16572 | Asia_W           | J2b1a6     | J            | J             | 37             |
| 2722 | JQ704524.1           | JQ704524.1; H7a1c; Asia_W_Europe; 13; A263G; C309CCT; T310C     | 16570 | Asia_W_Europe    | H7a1c      | H            | H             | 13             |
| 2723 | JQ704525.1           | JQ704525.1; H1a5; Asia_W_Europe; 15; A73G; A263G; C309CCT       | 16570 | Asia_W_Europe    | H1a5       | H            | H             | 15             |
| 2724 | JQ704526.1           | JQ704526.1; K1a4a1e; Asia_W; 35; A73G; T152C; A263G             | 16568 | Asia_W           | K1a4a1e    | K            | K             | 35             |
| 2725 | JQ704527.1           | JQ704527.1; H7e; Asia_W_Europe; 13; A263G; C309CCT; T310C       | 16570 | Asia_W_Europe    | H7e        | H            | H             | 13             |
| 2726 | JQ704528.1           | JQ704528.1; H3ap; Asia_W_Europe; 15; A73G; T199C; A263G         | 16570 | Asia_W_Europe    | H3ap       | H            | H             | 15             |
| 2727 | JQ704529.1           | JQ704529.1; H7c1; Asia_W_Europe; 17; C198T; A263G; C309CCT      | 16572 | Asia_W_Europe    | H7c1       | H            | H             | 17             |
| 2728 | JQ704530.1           | JQ704530.1; H2b; Asia_W_Europe; 12; T152C; A263G; C309CCT       | 16570 | Asia_W_Europe    | H2b        | H            | H             | 12             |
| 2729 | JQ704531.1           | JQ704531.1; H10a1b; Asia_W_Europe; 17; A263G; C309CCT; T310C    | 16570 | Asia_W_Europe    | H10a1b     | H            | H             | 17             |
| 2730 | JQ704532.1           | JQ704532.1; H2a2a1h; Asia_W_Europe; 3; C309CCCT; T310C; C16320T | 16571 | Asia_W_Europe    | H2a2a1h    | H            | H             | 3              |
| 2731 | JQ704533.1           | JQ704533.1; H2a2; Asia_W_Europe; 7; A263G; C309CCT; T310C       | 16570 | Asia_W_Europe    | H2a2       | H            | H             | 7              |
| 2732 | JQ704534.1           | JQ704534.1; H10e1; Asia_W_Europe; 14; A263G; C309CCT; T310C     | 16570 | Asia_W_Europe    | H10e1      | H            | H             | 14             |
| 2733 | JQ704535.1           | JQ704535.1; H49; Asia_W_Europe; 13; A263G; C309CCT; T310C       | 16570 | Asia_W_Europe    | H49        | H            | H             | 13             |
| 2734 | JQ704536.1           | JQ704536.1; H1a3d; Asia_W_Europe; 14; A73G; A263G; C315CC       | 16569 | Asia_W_Europe    | H1a3d      | H            | H             | 14             |
| 2735 | JQ704537.1           | JQ704537.1; K1a10a; Asia_W; 34; A73G; T195C; A263G              | 16573 | Asia_W           | K1a10a     | K            | K             | 34             |
| 2736 | JQ704538.1           | JQ704538.1; H1av; Asia_W_Europe; 11; A263G; C315CC; A750G       | 16569 | Asia_W_Europe    | H1av       | H            | H             | 11             |
| 2737 | JQ704539.1           | JQ704539.1; U6a1a2; Asia_SW_Africa_N; 32; A73G; A263G; C309CCCT | 16571 | Asia_SW_Africa_N | U6a1a2     | U            | U6            | 32             |
| 2738 | JQ704540.1           | JQ704540.1; H29b; Asia_W_Europe; 16; A93G; A95T; A263G          | 16571 | Asia_W_Europe    | H29b       | H            | H             | 16             |
| 2739 | JQ704541.1           | JQ704541.1; H27e; Asia_W_Europe; 13; A263G; C315CC; A750G       | 16560 | Asia_W_Europe    | H27e       | H            | H             | 13             |
| 2740 | JQ704542.1           | JQ704542.1; H3g2; Asia_W_Europe; 13; T152C; A263G; C315CC       | 16569 | Asia_W_Europe    | H3g2       | H            | H             | 13             |
| 2741 | JQ704543.1           | JQ704543.1; H6a1b3a; Asia_W_Europe; 22; T204C; T239C; A263G     | 16571 | Asia_W_Europe    | H6a1b3a    | H            | H             | 22             |
| 2742 | JQ704544.1           | JQ704544.1; H1+16239; Asia_W_Europe; 13; A263G; C315CC; A750G   | 16569 | Asia_W_Europe    | H1+16239   | H            | H             | 13             |
| 2743 | JQ704545.1           | JQ704545.1; H3v2; Asia_W_Europe; 16; A73G; A263G; C315CC        | 16569 | Asia_W_Europe    | H3v2       | H            | H             | 16             |
| 2744 | JQ704546.1           | JQ704546.1; H6a1b3; Asia_W_Europe; 21; T204C; T239C; A263G      | 16571 | Asia_W_Europe    | H6a1b3     | H            | H             | 21             |
| 2745 | JQ704547.1           | JQ704547.1; H3v; Asia_W_Europe; 12; A263G; C315CC; T408A        | 16569 | Asia_W_Europe    | H3v        | H            | H             | 12             |
| 2746 | JQ704548.1           | JQ704548.1; K1a13a; Asia_W; 37; A73G; T146C; T195C              | 16572 | Asia_W           | K1a13a     | K            | K             | 37             |
| 2747 | JQ704549.1           | JQ704549.1; H13a1a1; Asia_W_Europe; 16; A263G; C309CCCT; T310C  | 16571 | Asia_W_Europe    | H13a1a1    | H            | H             | 16             |

**Supplementary Table S3** Human mitochondrial database (hMITO DB v1.0) metadata

| Row  | Name (accession no.) | Description                                                                        | Size  | Geo_Region            | Haplogroup | Macro_Haplo | Macro_Haplo2 | Total Variants |
|------|----------------------|------------------------------------------------------------------------------------|-------|-----------------------|------------|-------------|--------------|----------------|
| 2748 | JQ704550.1           | JQ704550.1; H3a1; Asia_W_Europe; 16; T152C; T195C; A263G                           | 16570 | Asia_W_Europe         | H3a1       | H           | H            | 16             |
| 2749 | JQ704551.1           | JQ704551.1; H1b1+16362; Asia_W_Europe; 16; A263G; C315CC; CA522d                   | 16567 | Asia_W_Europe         | H1b1+16362 | H           | H            | 16             |
| 2750 | JQ704552.1           | JQ704552.1; H3h3a; Asia_W_Europe; 14; A263G; C315CC; A750G                         | 16569 | Asia_W_Europe         | H3h3a      | H           | H            | 14             |
| 2751 | JQ704553.1           | JQ704553.1; H1bd; Asia_W_Europe; 12; A200G; T204C; A263G                           | 16569 | Asia_W_Europe         | H1bd       | H           | H            | 12             |
| 2752 | JQ704554.1           | JQ704554.1; J1c2b; Asia_W; 30; A73G; G185A; A188G                                  | 16569 | Asia_W                | J1c2b      | J           | J            | 30             |
| 2753 | JQ704555.1           | JQ704555.1; U5a1c2a; Asia_W_Europe_C; 32; A73G; A183G; A263G                       | 16576 | Asia_W_Europe_C       | U5a1c2a    | U           | U5           | 32             |
| 2754 | JQ704556.1           | JQ704556.1; H49b; Asia_W_Europe; 15; T63C; C64T; A263G                             | 16571 | Asia_W_Europe         | H49b       | H           | H            | 15             |
| 2755 | JQ704557.1           | JQ704557.1; H1+16239; Asia_W_Europe; 13; T152C; A263G; C309CCT                     | 16570 | Asia_W_Europe         | H1+16239   | H           | H            | 13             |
| 2756 | JQ704558.1           | JQ704558.1; H1c; Asia_W_Europe; 12; A263G; C315CC; T477C                           | 16569 | Asia_W_Europe         | H1c        | H           | H            | 12             |
| 2757 | JQ704559.1           | JQ704559.1; H3a1a; Asia_W_Europe; 15; T152C; A263G; C309CCT                        | 16570 | Asia_W_Europe         | H3a1a      | H           | H            | 15             |
| 2758 | JQ704560.1           | JQ704560.1; H27; Asia_W_Europe; 13; A263G; C315CC; A750G                           | 16569 | Asia_W_Europe         | H27        | H           | H            | 13             |
| 2759 | JQ704561.1           | JQ704561.1; H10d; Asia_W_Europe; 13; A73G; A263G; C299A                            | 16569 | Asia_W_Europe         | H10d       | H           | H            | 13             |
| 2760 | JQ704562.1           | JQ704562.1; H1z1; Asia_W_Europe; 15; A263G; C309CCCT; T310C                        | 16571 | Asia_W_Europe         | H1z1       | H           | H            | 15             |
| 2761 | JQ704563.1           | JQ704563.1; H2a5; Asia_W_Europe; 10; A263G; C309CCT; T310C                         | 16570 | Asia_W_Europe         | H2a5       | H           | H            | 10             |
| 2762 | JQ704564.1           | JQ704564.1; H1az; Asia_W_Europe; 13; A263G; C309CCCT; T310C                        | 16571 | Asia_W_Europe         | H1az       | H           | H            | 13             |
| 2763 | JQ704565.1           | JQ704565.1; H2a2b5a; Asia_W_Europe; 10; A263G; C309CCT; T310C                      | 16570 | Asia_W_Europe         | H2a2b5a    | H           | H            | 10             |
| 2764 | JQ704566.1           | JQ704566.1; H1n1a; Asia_W_Europe; 16; T146C; A263G; C309CCT                        | 16572 | Asia_W_Europe         | H1n1a      | H           | H            | 16             |
| 2765 | JQ704567.1           | JQ704567.1; H1e2; Asia_W_Europe; 14; T146C; A263G; C315CC                          | 16569 | Asia_W_Europe         | H1e2       | H           | H            | 14             |
| 2766 | JQ704568.1           | JQ704568.1; U5b1d1c; Asia_W_Europe_C; 31; A73G; C150T; A263G                       | 16571 | Asia_W_Europe_C       | U5b1d1c    | U           | U5           | 31             |
| 2767 | JQ704569.1           | JQ704569.1; J1c14; Asia_W; 36; A73G; G185A; T195C                                  | 16570 | Asia_W                | J1c14      | J           | J            | 36             |
| 2768 | JQ704570.1           | JQ704570.1; H10; Asia_W_Europe; 12; A263G; C309CCCT; T310C                         | 16573 | Asia_W_Europe         | H10        | H           | H            | 12             |
| 2769 | JQ704571.1           | JQ704571.1; H1ad; Asia_W_Europe; 12; A263G; C309CCCT; T310C                        | 16571 | Asia_W_Europe         | H1ad       | H           | H            | 12             |
| 2770 | JQ704572.1           | JQ704572.1; U5b2b5; Asia_W_Europe_C; 37; A73G; C150T; A263G                        | 16569 | Asia_W_Europe_C       | U5b2b5     | U           | U5           | 37             |
| 2771 | JQ704573.1           | JQ704573.1; H10b1; Asia_W_Europe; 13; A263G; C309CCT; T310C                        | 16570 | Asia_W_Europe         | H10b1      | H           | H            | 13             |
| 2772 | JQ704574.1           | JQ704574.1; H; Asia_W_Europe; 11; A263G; C315CC; A750G                             | 16569 | Asia_W_Europe         | H          | H           | H            | 11             |
| 2773 | JQ704575.1           | JQ704575.1; H1a1; Asia_W_Europe; 14; A73G; A263G; C315CC                           | 16569 | Asia_W_Europe         | H1a1       | H           | H            | 14             |
| 2774 | JQ704576.1           | JQ704576.1; J1c8a; Asia_W; 30; A73G; G185A; G228A                                  | 16571 | Asia_W                | J1c8a      | J           | J            | 30             |
| 2775 | JQ704577.1           | JQ704577.1; H50; Asia_W_Europe; 11; A263G; C309CCT; T310C                          | 16570 | Asia_W_Europe         | H50        | H           | H            | 11             |
| 2776 | JQ704578.1           | JQ704578.1; H3s; Asia_W_Europe; 16; T152C; C194T; A263G                            | 16569 | Asia_W_Europe         | H3s        | H           | H            | 16             |
| 2777 | JQ704579.1           | JQ704579.1; H2a1a; Asia_W_Europe; 10; C315CC; CA522d(=CA514d <sup>+</sup> ); A750G | 16567 | Asia_W_Europe         | H2a1a      | H           | H            | 10             |
| 2778 | JQ704580.1           | JQ704580.1; H3y; Asia_W_Europe; 14; A263G; C309CCT; T310C                          | 16570 | Asia_W_Europe         | H3y        | H           | H            | 14             |
| 2779 | JQ704581.1           | JQ704581.1; J1c12a; Asia_W; 36; A73G; G185A; A189G                                 | 16572 | Asia_W                | J1c12a     | J           | J            | 36             |
| 2780 | JQ704582.1           | JQ704582.1; K1a10a; Asia_W; 35; A73G; T195C; A263G                                 | 16573 | Asia_W                | K1a10a     | K           | K            | 35             |
| 2781 | JQ704583.1           | JQ704583.1; H3ar; Asia_W_Europe; 11; A263G; C309CC; A750G                          | 16569 | Asia_W_Europe         | H3ar       | H           | H            | 11             |
| 2782 | JQ704584.1           | JQ704584.1; H3; Asia_W_Europe; 11; A263G; C315CC; A750G                            | 16569 | Asia_W_Europe         | H3         | H           | H            | 11             |
| 2783 | JQ704585.1           | JQ704585.1; H1c; Asia_W_Europe; 15; A263G; C309CCT; T310C                          | 16570 | Asia_W_Europe         | H1c        | H           | H            | 15             |
| 2784 | JQ704586.1           | JQ704586.1; B2g1; Asia_SE_E_America_N_S; 43; G62C; C64T; G66T                      | 16562 | Asia_SE_E_America_N_S | B2g1       | B           | B            | 43             |
| 2785 | JQ704587.1           | JQ704587.1; H1ay; Asia_W_Europe; 16; A263G; C315CC; A750G                          | 16569 | Asia_W_Europe         | H1ay       | H           | H            | 16             |
| 2786 | JQ704588.1           | JQ704588.1; H1bg; Asia_W_Europe; 15; C150T; A263G; C315CC                          | 16569 | Asia_W_Europe         | H1bg       | H           | H            | 15             |
| 2787 | JQ704589.1           | JQ704589.1; H1b1a; Asia_W_Europe; 17; T152C; A263G; C315CC                         | 16569 | Asia_W_Europe         | H1b1a      | H           | H            | 17             |
| 2788 | JQ704590.1           | JQ704590.1; U5a1a1; Asia_W_Europe_C; 28; A73G; A263G; C315CC                       | 16569 | Asia_W_Europe_C       | U5a1a1     | U           | U5           | 28             |

**Supplementary Table S3** Human mitochondrial database (hMITO DB v1.0) metadata

| Row  | Name (accession no.) | Description                                                            | Size  | Geo_Region         | Haplogroup   | Macro_Haplo | Macro_Haplo2 | Total Variants |
|------|----------------------|------------------------------------------------------------------------|-------|--------------------|--------------|-------------|--------------|----------------|
| 2789 | JQ704591.1           | JQ704591.1; K1a26; Asia_W; 34; A73G; T195C; A263G                      | 16571 | Asia_W             | K1a26        | K           | K            | 34             |
| 2790 | JQ704592.1           | JQ704592.1; H6a1b; Asia_W_Europe; 17; T239C; A263G; C309CCT            | 16570 | Asia_W_Europe      | H6a1b        | H           | H            | 17             |
| 2791 | JQ704593.1           | JQ704593.1; H1a; Asia_W_Europe; 14; A73G; A263G; G275A                 | 16569 | Asia_W_Europe      | H1a          | H           | H            | 14             |
| 2792 | JQ704594.1           | JQ704594.1; T1a1; Asia_W; 37; A73G; T152C; T195C                       | 16570 | Asia_W             | T1a1         | T           | T            | 37             |
| 2793 | JQ704595.1           | JQ704595.1; H3h2; Asia_W_Europe; 13; A263G; C315CC; A750G              | 16569 | Asia_W_Europe      | H3h2         | H           | H            | 13             |
| 2794 | JQ704596.1           | JQ704596.1; T2b4f; Asia_W; 37; A73G; T152C; A263G                      | 16570 | Asia_W             | T2b4f        | T           | T            | 37             |
| 2795 | JQ704597.1           | JQ704597.1; T2b4; Asia_W; 35; A73G; A263G; C309CCT                     | 16570 | Asia_W             | T2b4         | T           | T            | 35             |
| 2796 | JQ704598.1           | JQ704598.1; U5b1+16189+@16192; Asia_W_Europe_C; 29; A73G; C150T; A263G | 16570 | Asia_W_Europe_C    | U5b1+16189+@ | U           | U5           | 29             |
| 2797 | JQ704599.1           | JQ704599.1; D1m; Asia_E_America_N_S; 38; A73G; A263G; C315CC           | 16567 | Asia_E_America_N_S | D1m          | D           | D            | 38             |
| 2798 | JQ704600.1           | JQ704600.1; J2a1a1; Asia_W; 40; A73G; C150T; T152C                     | 16570 | Asia_W             | J2a1a1       | J           | J            | 40             |
| 2799 | JQ704601.1           | JQ704601.1; H1a1; Asia_W_Europe; 14; A73G; A263G; C315CC               | 16569 | Asia_W_Europe      | H1a1         | H           | H            | 14             |
| 2800 | JQ704602.1           | JQ704602.1; V10a; Europe_S; 18; T72C; A263G; C309CCT                   | 16570 | Europe_S           | V10a         | V           | V            | 18             |
| 2801 | JQ704603.1           | JQ704603.1; H5a3; Asia_W_Europe; 16; A263G; C309CCT; T310C             | 16570 | Asia_W_Europe      | H5a3         | H           | H            | 16             |
| 2802 | JQ704604.1           | JQ704604.1; J1c8a; Asia_W; 29; A73G; G185A; G228A                      | 16570 | Asia_W             | J1c8a        | J           | J            | 29             |
| 2803 | JQ704605.1           | JQ704605.1; H7c2; Asia_W_Europe; 12; A263G; C309CCCT; T310C            | 16571 | Asia_W_Europe      | H7c2         | H           | H            | 12             |
| 2804 | JQ704606.1           | JQ704606.1; H1br; Asia_W_Europe; 13; A73G; A263G; C309CCT              | 16570 | Asia_W_Europe      | H1br         | H           | H            | 13             |
| 2805 | JQ704607.1           | JQ704607.1; H7e; Asia_W_Europe; 15; A263G; C309CCCT; T310C             | 16571 | Asia_W_Europe      | H7e          | H           | H            | 15             |
| 2806 | JQ704608.1           | JQ704608.1; H6a1a2a; Asia_W_Europe; 18; C41T; C150T; T239C             | 16571 | Asia_W_Europe      | H6a1a2a      | H           | H            | 18             |
| 2807 | JQ704609.1           | JQ704609.1; J1b1a1; Asia_W; 36; A73G; C242T; A263G                     | 16570 | Asia_W             | J1b1a1       | J           | J            | 36             |
| 2808 | JQ704610.1           | JQ704610.1; HV0d; Asia_W; 17; C64T; T72C; T195C                        | 16570 | Asia_W             | HV0d         | HV          | HV           | 17             |
| 2809 | JQ704611.1           | JQ704611.1; H3h2; Asia_W_Europe; 12; A263G; C315CC; A750G              | 16569 | Asia_W_Europe      | H3h2         | H           | H            | 12             |
| 2810 | JQ704612.1           | JQ704612.1; H1a3a1; Asia_W_Europe; 15; A73G; A263G; C309CCT            | 16570 | Asia_W_Europe      | H1a3a1       | H           | H            | 15             |
| 2811 | JQ704613.1           | JQ704613.1; H1n6; Asia_W_Europe; 18; T195C; A263G; C315CC              | 16571 | Asia_W_Europe      | H1n6         | H           | H            | 18             |
| 2812 | JQ704614.1           | JQ704614.1; H6a1a; Asia_W_Europe; 17; T239C; A263G; C309CCT            | 16570 | Asia_W_Europe      | H6a1a        | H           | H            | 17             |
| 2813 | JQ704615.1           | JQ704615.1; J1c3a2; Asia_W; 28; A73G; A263G; C295T                     | 16569 | Asia_W             | J1c3a2       | J           | J            | 28             |
| 2814 | JQ704616.1           | JQ704616.1; U5a1f1a1; Asia_W_Europe_C; 34; A73G; T199C; A263G          | 16571 | Asia_W_Europe_C    | U5a1f1a1     | U           | U5           | 34             |
| 2815 | JQ704617.1           | JQ704617.1; T2a1a2; Asia_W; 36; A73G; A263G; C315CC                    | 16569 | Asia_W             | T2a1a2       | T           | T            | 36             |
| 2816 | JQ704618.1           | JQ704618.1; H1c3b; Asia_W_Europe; 18; A257G; A263G; C309CCCT           | 16571 | Asia_W_Europe      | H1c3b        | H           | H            | 18             |
| 2817 | JQ704619.1           | JQ704619.1; H+152; Asia_W_Europe; 15; T152C; A263G; C309CCCT           | 16573 | Asia_W_Europe      | H+152        | H           | H            | 15             |
| 2818 | JQ704620.1           | JQ704620.1; H+16129; Asia_W_Europe; 16; A263G; C309CCT; T310C          | 16570 | Asia_W_Europe      | H+16129      | H           | H            | 16             |
| 2819 | JQ704621.1           | JQ704621.1; H6a1b2; Asia_W_Europe; 17; T239C; A263G; C309CCT           | 16570 | Asia_W_Europe      | H6a1b2       | H           | H            | 17             |
| 2820 | JQ704622.1           | JQ704622.1; H3a1a; Asia_W_Europe; 15; T152C; A263G; C309CCCT           | 16571 | Asia_W_Europe      | H3a1a        | H           | H            | 15             |
| 2821 | JQ704623.1           | JQ704623.1; V; Europe_S; 15; T72C; A263G; C309CCT                      | 16570 | Europe_S           | V            | V           | V            | 15             |
| 2822 | JQ704624.1           | JQ704624.1; H1b; Asia_W_Europe; 15; T199C; A263G; C315CC               | 16569 | Asia_W_Europe      | H1b          | H           | H            | 15             |
| 2823 | JQ704625.1           | JQ704625.1; K2a; Asia_W; 32; A73G; T146C; T152C                        | 16570 | Asia_W             | K2a          | K           | K            | 32             |
| 2824 | JQ704626.1           | JQ704626.1; J1b1a1+146; Asia_W; 37; A73G; T146C; C242T                 | 16570 | Asia_W             | J1b1a1+146   | J           | J            | 37             |
| 2825 | JQ704627.1           | JQ704627.1; U2e2a1c; Asia_S_W_Europe; 45; A73G; T146C; T152C           | 16570 | Asia_S_W_Europe    | U2e2a1c      | U           | U2           | 45             |
| 2826 | JQ704628.1           | JQ704628.1; H; Asia_W_Europe; 9; A263G; C315CC; A750G                  | 16569 | Asia_W_Europe      | H            | H           | H            | 9              |
| 2827 | JQ704629.1           | JQ704629.1; H7d1; Asia_W_Europe; 13; A263G; C315CC; A750G              | 16569 | Asia_W_Europe      | H7d1         | H           | H            | 13             |
| 2828 | JQ704630.1           | JQ704630.1; H1q; Asia_W_Europe; 11; T204C; A263G; C315CC               | 16569 | Asia_W_Europe      | H1q          | H           | H            | 11             |
| 2829 | JQ704631.1           | JQ704631.1; H31; Asia_W_Europe; 13; T146C; T195C; A263G                | 16569 | Asia_W_Europe      | H31          | H           | H            | 13             |

**Supplementary Table S3** Human mitochondrial database (hMITO DB v1.0) metadata

| Row  | Name (accession no.) | Description                                                      | Size  | Geo_Region        | Haplogroup | Macro_Haplo | Macro_Haplo2 | Total Variants |
|------|----------------------|------------------------------------------------------------------|-------|-------------------|------------|-------------|--------------|----------------|
| 2830 | JQ704632.1           | JQ704632.1; H3i1; Asia_W_Europe; 14; T152C; A263G; C315CC        | 16569 | Asia_W_Europe     | H3i1       | H           | H            | 14             |
| 2831 | JQ704633.1           | JQ704633.1; H3n; Asia_W_Europe; 15; A263G; C309CCT; T310C        | 16570 | Asia_W_Europe     | H3n        | H           | H            | 15             |
| 2832 | JQ704634.1           | JQ704634.1; V1b; Europe_S; 21; T72C; T217C; A263G                | 16570 | Europe_S          | V1b        | V           | V            | 21             |
| 2833 | JQ704635.1           | JQ704635.1; H3b1b1; Asia_W_Europe; 18; A263G; C309CCT; T310C     | 16570 | Asia_W_Europe     | H3b1b1     | H           | H            | 18             |
| 2834 | JQ704636.1           | JQ704636.1; H1b1+16362; Asia_W_Europe; 16; A263G; C309CCT; T310C | 16568 | Asia_W_Europe     | H1b1+16362 | H           | H            | 16             |
| 2835 | JQ704637.1           | JQ704637.1; H1c1; Asia_W_Europe; 13; A263G; C315CC; T477C        | 16569 | Asia_W_Europe     | H1c1       | H           | H            | 13             |
| 2836 | JQ704638.1           | JQ704638.1; H3aa; Asia_W_Europe; 11; A263G; C309CCT; T310C       | 16570 | Asia_W_Europe     | H3aa       | H           | H            | 11             |
| 2837 | JQ704639.1           | JQ704639.1; H1c1; Asia_W_Europe; 13; A263G; C315CC; T477C        | 16569 | Asia_W_Europe     | H1c1       | H           | H            | 13             |
| 2838 | JQ704640.1           | JQ704640.1; H79; Asia_W_Europe; 13; A263G; C309CCCT; T310C       | 16571 | Asia_W_Europe     | H79        | H           | H            | 13             |
| 2839 | JQ704641.1           | JQ704641.1; H3af; Asia_W_Europe; 12; A263G; C309CCT; T310C       | 16570 | Asia_W_Europe     | H3af       | H           | H            | 12             |
| 2840 | JQ704642.1           | JQ704642.1; A2f3; Asia_NE_America_N; 39; C64T; A73G; T146C       | 16567 | Asia_NE_America_N | A2f3       | A           | A            | 39             |
| 2841 | JQ704643.1           | JQ704643.1; T2b7a2; Asia_W; 39; A73G; A263G; C309CCCT            | 16571 | Asia_W            | T2b7a2     | T           | T            | 39             |
| 2842 | JQ704644.1           | JQ704644.1; H27f; Asia_W_Europe; 13; A263G; C315CC; A750G        | 16569 | Asia_W_Europe     | H27f       | H           | H            | 13             |
| 2843 | JQ704645.1           | JQ704645.1; U5a2a1d; Asia_W_Europe_C; 33; A73G; A263G; C309CCT   | 16570 | Asia_W_Europe_C   | U5a2a1d    | U           | U5           | 33             |
| 2844 | JQ704646.1           | JQ704646.1; H7f; Asia_W_Europe; 13; A263G; C315CC; A750G         | 16569 | Asia_W_Europe     | H7f        | H           | H            | 13             |
| 2845 | JQ704647.1           | JQ704647.1; H1bh; Asia_W_Europe; 13; A263G; C309CCT; T310C       | 16570 | Asia_W_Europe     | H1bh       | H           | H            | 13             |
| 2846 | JQ704648.1           | JQ704648.1; H4a1d; Asia_W_Europe; 20; A263G; C309CCT; T310C      | 16570 | Asia_W_Europe     | H4a1d      | H           | H            | 20             |
| 2847 | JQ704649.1           | JQ704649.1; H3af; Asia_W_Europe; 12; A263G; C315CC; A750G        | 16569 | Asia_W_Europe     | H3af       | H           | H            | 12             |
| 2848 | JQ704650.1           | JQ704650.1; H5a1g1a; Asia_W_Europe; 19; T152C; A263G; C315CC     | 16567 | Asia_W_Europe     | H5a1g1a    | H           | H            | 19             |
| 2849 | JQ704651.1           | JQ704651.1; H6a1b3; Asia_W_Europe; 18; T204C; T239C; A263G       | 16569 | Asia_W_Europe     | H6a1b3     | H           | H            | 18             |
| 2850 | JQ704652.1           | JQ704652.1; H5a1g1a; Asia_W_Europe; 18; A263G; C315CC; A444G     | 16567 | Asia_W_Europe     | H5a1g1a    | H           | H            | 18             |
| 2851 | JQ704653.1           | JQ704653.1; H6a1b2; Asia_W_Europe; 16; T152C; T239C; A263G       | 16570 | Asia_W_Europe     | H6a1b2     | H           | H            | 16             |
| 2852 | JQ704654.1           | JQ704654.1; K1a1b1a; Asia_W; 37; A73G; C114T; A263G              | 16569 | Asia_W            | K1a1b1a    | K           | K            | 37             |
| 2853 | JQ704655.1           | JQ704655.1; H1n1; Asia_W_Europe; 15; T146C; T152C; A215G         | 16569 | Asia_W_Europe     | H1n1       | H           | H            | 15             |
| 2854 | JQ704656.1           | JQ704656.1; H1e1b1b; Asia_W_Europe; 15; A263G; C315CC; T453C     | 16569 | Asia_W_Europe     | H1e1b1b    | H           | H            | 15             |
| 2855 | JQ704657.1           | JQ704657.1; H1ag1; Asia_W_Europe; 13; A263G; C309CCCT; T310C     | 16571 | Asia_W_Europe     | H1ag1      | H           | H            | 13             |
| 2856 | JQ704658.1           | JQ704658.1; U5a1a1c; Asia_W_Europe_C; 30; A73G; A263G; C315CC    | 16569 | Asia_W_Europe_C   | U5a1a1c    | U           | U5           | 30             |
| 2857 | JQ704659.1           | JQ704659.1; H1; Asia_W_Europe; 10; A263G; T279C; C315CC          | 16569 | Asia_W_Europe     | H1         | H           | H            | 10             |
| 2858 | JQ704660.1           | JQ704660.1; V7b; Europe_S; 20; T72C; A93G; A263G                 | 16570 | Europe_S          | V7b        | V           | V            | 20             |
| 2859 | JQ704661.1           | JQ704661.1; U4c1; Asia_N_Europe_N; 35; A73G; C150T; T195C        | 16575 | Asia_N_Europe_N   | U4c1       | U           | U4           | 35             |
| 2860 | JQ704662.1           | JQ704662.1; K2a6; Asia_W; 35; A73G; T146C; T152C                 | 16570 | Asia_W            | K2a6       | K           | K            | 35             |
| 2861 | JQ704663.1           | JQ704663.1; K1a+150; Asia_W; 33; A73G; C150T; T152C              | 16569 | Asia_W            | K1a+150    | K           | K            | 33             |
| 2862 | JQ704664.1           | JQ704664.1; H11b1; Asia_W_Europe; 18; T146C; T195C; A263G        | 16570 | Asia_W_Europe     | H11b1      | H           | H            | 18             |
| 2863 | JQ704665.1           | JQ704665.1; J1c3f; Asia_W; 31; A73G; A263G; C295T                | 16569 | Asia_W            | J1c3f      | J           | J            | 31             |
| 2864 | JQ704666.1           | JQ704666.1; H; Asia_W_Europe; 10; A73G; A263G; C315CC            | 16569 | Asia_W_Europe     | H          | H           | H            | 10             |
| 2865 | JQ704667.1           | JQ704667.1; H1q; Asia_W_Europe; 16; A73G; A263G; C315CC          | 16569 | Asia_W_Europe     | H1q        | H           | H            | 16             |
| 2866 | JQ704668.1           | JQ704668.1; L2a1f; Africa_W_C; 54; A73G; T146C; T152C            | 16570 | Africa_W_C        | L2a1f      | L2          | L2           | 54             |
| 2867 | JQ704669.1           | JQ704669.1; H1ap1; Asia_W_Europe; 14; T152C; A263G; C309CCT      | 16570 | Asia_W_Europe     | H1ap1      | H           | H            | 14             |
| 2868 | JQ704670.1           | JQ704670.1; L3f1b1a; Africa_E; 45; A73G; A189G; A200G            | 16569 | Africa_E          | L3f1b1a    | L3          | L3           | 45             |
| 2869 | JQ704671.1           | JQ704671.1; H1ar1; Asia_W_Europe; 15; T152C; A183G; A263G        | 16570 | Asia_W_Europe     | H1ar1      | H           | H            | 15             |
| 2870 | JQ704672.1           | JQ704672.1; H24b; Asia_W_Europe; 12; A263G; C309CCT; T310C       | 16570 | Asia_W_Europe     | H24b       | H           | H            | 12             |

**Supplementary Table S3** Human mitochondrial database (hMITO DB v1.0) metadata

| Row  | Name (accession no.) | Description                                                        | Size  | Geo_Region            | Haplogroup | Macro_Haplo | Macro_Haplo2 | Total Variants |
|------|----------------------|--------------------------------------------------------------------|-------|-----------------------|------------|-------------|--------------|----------------|
| 2871 | JQ704673.1           | JQ704673.1; H2a2b5a; Asia_W_Europe; 12; A263G; C309CCT; T310C      | 16570 | Asia_W_Europe         | H2a2b5a    | H           | H            | 12             |
| 2872 | JQ704674.1           | JQ704674.1; H3c1; Asia_W_Europe; 16; A189G; A263G; C315CC          | 16569 | Asia_W_Europe         | H3c1       | H           | H            | 16             |
| 2873 | JQ704675.1           | JQ704675.1; U4c1; Asia_N_Europe_N; 38; A73G; T195C; A263G          | 16572 | Asia_N_Europe_N       | U4c1       | U           | U4           | 38             |
| 2874 | JQ704676.1           | JQ704676.1; U4b1b2; Asia_N_Europe_N; 33; A73G; T152C; T195C        | 16571 | Asia_N_Europe_N       | U4b1b2     | U           | U4           | 33             |
| 2875 | JQ704677.1           | JQ704677.1; H57; Asia_W_Europe; 14; C64T; A263G; C309CCT           | 16569 | Asia_W_Europe         | H57        | H           | H            | 14             |
| 2876 | JQ704678.1           | JQ704678.1; H3ap; Asia_W_Europe; 13; C150T; A263G; C309CCT         | 16570 | Asia_W_Europe         | H3ap       | H           | H            | 13             |
| 2877 | JQ704679.1           | JQ704679.1; U5a1b1e; Asia_W_Europe_C; 30; A73G; A263G; C309CCT     | 16570 | Asia_W_Europe_C       | U5a1b1e    | U           | U5           | 30             |
| 2878 | JQ704680.1           | JQ704680.1; H16b; Asia_W_Europe; 12; A263G; C315CC; A750G          | 16569 | Asia_W_Europe         | H16b       | H           | H            | 12             |
| 2879 | JQ704681.1           | JQ704681.1; B2a1a1; Asia_SE_E_America_N_S; 30; A73G; A263G; C315CC | 16560 | Asia_SE_E_America_N_S | B2a1a1     | B           | B            | 30             |
| 2880 | JQ704682.1           | JQ704682.1; H13a1a1; Asia_W_Europe; 14; A263G; C309CCCT; T310C     | 16571 | Asia_W_Europe         | H13a1a1    | H           | H            | 14             |
| 2881 | JQ704683.1           | JQ704683.1; L1b1a17; Africa_C; 82; A73G; T152C; C182T              | 16569 | Africa_C              | L1b1a17    | L1          | L1           | 82             |
| 2882 | JQ704684.1           | JQ704684.1; H4a1a1a; Asia_W_Europe; 17; A73G; A263G; C309CCT       | 16568 | Asia_W_Europe         | H4a1a1a    | H           | H            | 17             |
| 2883 | JQ704685.1           | JQ704685.1; H1c4b1; Asia_W_Europe; 13; A263G; C315CC; T477C        | 16569 | Asia_W_Europe         | H1c4b1     | H           | H            | 13             |
| 2884 | JQ704686.1           | JQ704686.1; H2a2b; Asia_W_Europe; 9; A263G; C309CCT; T310C         | 16570 | Asia_W_Europe         | H2a2b      | H           | H            | 9              |
| 2885 | JQ704687.1           | JQ704687.1; H2a5b1; Asia_W_Europe; 10; A249d; A263G; C309CCCT      | 16570 | Asia_W_Europe         | H2a5b1     | H           | H            | 10             |
| 2886 | JQ704688.1           | JQ704688.1; T2b4b; Asia_W; 38; A73G; T152C; A263G                  | 16570 | Asia_W                | T2b4b      | T           | T            | 38             |
| 2887 | JQ704689.1           | JQ704689.1; H52; Asia_W_Europe; 12; T152C; A263G; C309CCT          | 16570 | Asia_W_Europe         | H52        | H           | H            | 12             |
| 2888 | JQ704690.1           | JQ704690.1; I1a1b; Asia_W_SW; 42; A73G; T199C; G203A               | 16572 | Asia_W_SW             | I1a1b      | I           | I            | 42             |
| 2889 | JQ704691.1           | JQ704691.1; H7a1; Asia_W_Europe; 14; C194T; A263G; C309CCT         | 16570 | Asia_W_Europe         | H7a1       | H           | H            | 14             |
| 2890 | JQ704692.1           | JQ704692.1; H14a2c; Asia_W_Europe; 18; A263G; C309CCCT; T310C      | 16571 | Asia_W_Europe         | H14a2c     | H           | H            | 18             |
| 2891 | JQ704693.1           | JQ704693.1; H1e1a; Asia_W_Europe; 17; T146C; A263G; C315CC         | 16569 | Asia_W_Europe         | H1e1a      | H           | H            | 17             |
| 2892 | JQ704694.1           | JQ704694.1; H; Asia_W_Europe; 13; C151T; A263G; C315CC             | 16569 | Asia_W_Europe         | H          | H           | H            | 13             |
| 2893 | JQ704695.1           | JQ704695.1; U5a1a1d1; Asia_W_Europe_C; 32; A73G; G185A; A189G      | 16569 | Asia_W_Europe_C       | U5a1a1d1   | U           | U5           | 32             |
| 2894 | JQ704696.1           | JQ704696.1; K1a1a2; Asia_W; 35; A73G; A263G; C315CC                | 16569 | Asia_W                | K1a1a2     | K           | K            | 35             |
| 2895 | JQ704697.1           | JQ704697.1; T2b25; Asia_W; 36; A73G; A263G; C315CCC                | 16570 | Asia_W                | T2b25      | T           | T            | 36             |
| 2896 | JQ704698.1           | JQ704698.1; H2a2a1a; Asia_W_Europe; 4; C315CC; T7220C; G15314A     | 16569 | Asia_W_Europe         | H2a2a1a    | H           | H            | 4              |
| 2897 | JQ704699.1           | JQ704699.1; T2b19; Asia_W; 36; A73G; A263G; C315CC                 | 16567 | Asia_W                | T2b19      | T           | T            | 36             |
| 2898 | JQ704700.1           | JQ704700.1; U5a1d2a; Asia_W_Europe_C; 34; A73G; T195C; A263G       | 16571 | Asia_W_Europe_C       | U5a1d2a    | U           | U5           | 34             |
| 2899 | JQ704701.1           | JQ704701.1; U5a1a2b; Asia_W_Europe_C; 31; A73G; A263G; C309CCT     | 16571 | Asia_W_Europe_C       | U5a1a2b    | U           | U5           | 31             |
| 2900 | JQ704702.1           | JQ704702.1; H1g1; Asia_W_Europe; 13; A263G; C309CCCT; T310C        | 16571 | Asia_W_Europe         | H1g1       | H           | H            | 13             |
| 2901 | JQ704703.1           | JQ704703.1; V20; Europe_S; 18; T72C; A263G; C315CC                 | 16569 | Europe_S              | V20        | V           | V            | 18             |
| 2902 | JQ704704.1           | JQ704704.1; H3k; Asia_W_Europe; 13; T152C; A263G; C309CCCT         | 16571 | Asia_W_Europe         | H3k        | H           | H            | 13             |
| 2903 | JQ704705.1           | JQ704705.1; I2; Asia_W_SW; 36; A73G; T152C; T199C                  | 16572 | Asia_W_SW             | I2         | I           | I            | 36             |
| 2904 | JQ704706.1           | JQ704706.1; H5e1a; Asia_W_Europe; 14; A263G; C315CC; C456T         | 16569 | Asia_W_Europe         | H5e1a      | H           | H            | 14             |
| 2905 | JQ704707.1           | JQ704707.1; K2a3; Asia_W; 33; A73G; T146C; T152C                   | 16570 | Asia_W                | K2a3       | K           | K            | 33             |
| 2906 | JQ704708.1           | JQ704708.1; U5a1a1; Asia_W_Europe_C; 26; A73G; A263G; C315CC       | 16569 | Asia_W_Europe_C       | U5a1a1     | U           | U5           | 26             |
| 2907 | JQ704709.1           | JQ704709.1; H1b1+16362; Asia_W_Europe; 18; A263G; C309CCCT; T310C  | 16569 | Asia_W_Europe         | H1b1+16362 | H           | H            | 18             |
| 2908 | JQ704710.1           | JQ704710.1; J1c2b1; Asia_W; 35; A73G; G185A; A188G                 | 16570 | Asia_W                | J1c2b1     | J           | J            | 35             |
| 2909 | JQ704711.1           | JQ704711.1; H7d2; Asia_W_Europe; 14; A263G; A291AA; C309CCT        | 16571 | Asia_W_Europe         | H7d2       | H           | H            | 14             |
| 2910 | JQ704712.1           | JQ704712.1; H7d; Asia_W_Europe; 12; A263G; C309CCT; T310C          | 16570 | Asia_W_Europe         | H7d        | H           | H            | 12             |
| 2911 | JQ704713.1           | JQ704713.1; I5a1b; Asia_W_SW; 38; A73G; T199C; T250C               | 16562 | Asia_W_SW             | I5a1b      | I           | I            | 38             |

**Supplementary Table S3** Human mitochondrial database (hMITO DB v1.0) metadata

| Row  | Name (accession no.) | Description                                                        | Size  | Geo_Region       | Haplogroup    | Macro_Haplo | Macro_Haplo2 | Total Variants |
|------|----------------------|--------------------------------------------------------------------|-------|------------------|---------------|-------------|--------------|----------------|
| 2912 | JQ704714.1           | JQ704714.1; H7c2; Asia_W_Europe; 13; A263G; C309CCCT; T310C        | 16571 | Asia_W_Europe    | H7c2          | H           | H            | 13             |
| 2913 | JQ704715.1           | JQ704715.1; H1ab; Asia_W_Europe; 14; A263G; C315CC; A750G          | 16569 | Asia_W_Europe    | H1ab          | H           | H            | 14             |
| 2914 | JQ704716.1           | JQ704716.1; H5g; Asia_W_Europe; 14; T146C; A263G; C309CCCT         | 16573 | Asia_W_Europe    | H5g           | H           | H            | 14             |
| 2915 | JQ704717.1           | JQ704717.1; H1h2; Asia_W_Europe; 13; A263G; C315CC; A750G          | 16569 | Asia_W_Europe    | H1h2          | H           | H            | 13             |
| 2916 | JQ704718.1           | JQ704718.1; H1c3; Asia_W_Europe; 14; A257G; A263G; C315CC          | 16569 | Asia_W_Europe    | H1c3          | H           | H            | 14             |
| 2917 | JQ704719.1           | JQ704719.1; H1c1; Asia_W_Europe; 13; A263G; C315CC; T477C          | 16569 | Asia_W_Europe    | H1c1          | H           | H            | 13             |
| 2918 | JQ704720.1           | JQ704720.1; H1q; Asia_W_Europe; 12; A263G; C315CC; A750G           | 16569 | Asia_W_Europe    | H1q           | H           | H            | 12             |
| 2919 | JQ704721.1           | JQ704721.1; H1c; Asia_W_Europe; 11; A263G; C315CC; T477C           | 16569 | Asia_W_Europe    | H1c           | H           | H            | 11             |
| 2920 | JQ704722.1           | JQ704722.1; H3g4; Asia_W_Europe; 16; T152C; A263G; C309CCCT        | 16570 | Asia_W_Europe    | H3g4          | H           | H            | 16             |
| 2921 | JQ704723.1           | JQ704723.1; U5a1a1b; Asia_W_Europe_C; 29; A73G; T152C; A263G       | 16570 | Asia_W_Europe_C  | U5a1a1b       | U           | U5           | 29             |
| 2922 | JQ704724.1           | JQ704724.1; K1d; Asia_W; 36; A73G; T195C; A263G                    | 16574 | Asia_W           | K1d           | K           | K            | 36             |
| 2923 | JQ704725.1           | JQ704725.1; U5a1a1b; Asia_W_Europe_C; 29; A73G; T152C; A263G       | 16569 | Asia_W_Europe_C  | U5a1a1b       | U           | U5           | 29             |
| 2924 | JQ704726.1           | JQ704726.1; U5b2a1a+16311; Asia_W_Europe_C; 29; A73G; C150T; A263G | 16570 | Asia_W_Europe_C  | U5b2a1a+16311 | U           | U5           | 29             |
| 2925 | JQ704727.1           | JQ704727.1; K1a4a1; Asia_W; 35; A73G; A200G; A263G                 | 16571 | Asia_W           | K1a4a1        | K           | K            | 35             |
| 2926 | JQ704728.1           | JQ704728.1; L3e1f; Africa_E; 39; A73G; C150T; A189G                | 16563 | Africa_E         | L3e1f         | L3          | L3           | 39             |
| 2927 | JQ704729.1           | JQ704729.1; K1c2; Asia_W; 35; A73G; T146C; T152C                   | 16568 | Asia_W           | K1c2          | K           | K            | 35             |
| 2928 | JQ704730.1           | JQ704730.1; H5a1f; Asia_W_Europe; 14; A263G; C315CC; C456T         | 16567 | Asia_W_Europe    | H5a1f         | H           | H            | 14             |
| 2929 | JQ704731.1           | JQ704731.1; H1; Asia_W_Europe; 12; A263G; C315CC; A750G            | 16569 | Asia_W_Europe    | H1            | H           | H            | 12             |
| 2930 | JQ704732.1           | JQ704732.1; T1a1g; Asia_W; 37; A73G; T152C; T195C                  | 16569 | Asia_W           | T1a1g         | T           | T            | 37             |
| 2931 | JQ704733.1           | JQ704733.1; H3m; Asia_W_Europe; 13; A263G; C315CC; A750G           | 16569 | Asia_W_Europe    | H3m           | H           | H            | 13             |
| 2932 | JQ704734.1           | JQ704734.1; U5a1b1; Asia_W_Europe_C; 29; A73G; C150T; A263G        | 16569 | Asia_W_Europe_C  | U5a1b1        | U           | U5           | 29             |
| 2933 | JQ704735.1           | JQ704735.1; T1a1; Asia_W; 35; A73G; T152C; T195C                   | 16570 | Asia_W           | T1a1          | T           | T            | 35             |
| 2934 | JQ704736.1           | JQ704736.1; J1c5a1; Asia_W; 32; A73G; G185A; G228A                 | 16569 | Asia_W           | J1c5a1        | J           | J            | 32             |
| 2935 | JQ704737.1           | JQ704737.1; K1c2; Asia_W; 38; A73G; T146C; C150T                   | 16569 | Asia_W           | K1c2          | K           | K            | 38             |
| 2936 | JQ704738.1           | JQ704738.1; T2b4a1; Asia_W; 36; A73G; A263G; C309CCCT              | 16570 | Asia_W           | T2b4a1        | T           | T            | 36             |
| 2937 | JQ704739.1           | JQ704739.1; H27a; Asia_W_Europe; 13; A263G; C315CC; A750G          | 16569 | Asia_W_Europe    | H27a          | H           | H            | 13             |
| 2938 | JQ704740.1           | JQ704740.1; L2c2a1; Africa_W_C; 62; A73G; A93G; T146C              | 16568 | Africa_W_C       | L2c2a1        | L2          | L2           | 62             |
| 2939 | JQ704741.1           | JQ704741.1; U4d1a1a; Asia_N_Europe_N; 35; A73G; T195C; A263G       | 16573 | Asia_N_Europe_N  | U4d1a1a       | U           | U4           | 35             |
| 2940 | JQ704742.1           | JQ704742.1; T2b4c; Asia_W; 37; A73G; T152C; A263G                  | 16572 | Asia_W           | T2b4c         | T           | T            | 37             |
| 2941 | JQ704743.1           | JQ704743.1; H1bb; Asia_W_Europe; 14; T152C; C194T; T199C           | 16569 | Asia_W_Europe    | H1bb          | H           | H            | 14             |
| 2942 | JQ704744.1           | JQ704744.1; H1b3; Asia_W_Europe; 16; A263G; C315CC; A750G          | 16569 | Asia_W_Europe    | H1b3          | H           | H            | 16             |
| 2943 | JQ704745.1           | JQ704745.1; J1c3a1; Asia_W; 32; A73G; G228A; A263G                 | 16570 | Asia_W           | J1c3a1        | J           | J            | 32             |
| 2944 | JQ704746.1           | JQ704746.1; T2b4; Asia_W; 36; A73G; T217C; A263G                   | 16569 | Asia_W           | T2b4          | T           | T            | 36             |
| 2945 | JQ704747.1           | JQ704747.1; H54; Asia_W_Europe; 14; T72C; C182T; A263G             | 16569 | Asia_W_Europe    | H54           | H           | H            | 14             |
| 2946 | JQ704748.1           | JQ704748.1; H3b1a; Asia_W_Europe; 17; A263G; C309CCCT; T310C       | 16570 | Asia_W_Europe    | H3b1a         | H           | H            | 17             |
| 2947 | JQ704749.1           | JQ704749.1; U6a1a2; Asia_SW_Africa_N; 33; A73G; T152C; G251A       | 16569 | Asia_SW_Africa_N | U6a1a2        | U           | U6           | 33             |
| 2948 | JQ704750.1           | JQ704750.1; H5; Asia_W_Europe; 14; A263G; C309CCCT; T310C          | 16570 | Asia_W_Europe    | H5            | H           | H            | 14             |
| 2949 | JQ704751.1           | JQ704751.1; J1c10; Asia_W; 32; A73G; G228A; A263G                  | 16570 | Asia_W           | J1c10         | J           | J            | 32             |
| 2950 | JQ704752.1           | JQ704752.1; V7a; Europe_S; 23; T72C; T89C; A93G                    | 16570 | Europe_S         | V7a           | V           | V            | 23             |
| 2951 | JQ704753.1           | JQ704753.1; H3+152; Asia_W_Europe; 12; T152C; A263G; C309CCCT      | 16570 | Asia_W_Europe    | H3+152        | H           | H            | 12             |
| 2952 | JQ704754.1           | JQ704754.1; X2b7; Asia_W_America_N; 34; A73G; A153G; T195C         | 16570 | Asia_W_America_N | X2b7          | X           | X            | 34             |



**Supplementary Table S3** Human mitochondrial database (hMITO DB v1.0) metadata

| Row  | Name (accession no.) | Description                                                        | Size  | Geo_Region           | Haplogroup    | Macro_Haplo | Macro_Haplo2 | Total Variants |
|------|----------------------|--------------------------------------------------------------------|-------|----------------------|---------------|-------------|--------------|----------------|
| 2953 | JQ704755.1           | JQ704755.1; H27b; Asia_W_Europe; 15; A263G; C315CC; CA522d         | 16567 | Asia_W_Europe        | H27b          | H           | H            | 15             |
| 2954 | JQ704756.1           | JQ704756.1; H1bj; Asia_W_Europe; 12; A263G; C309CCT; T310C         | 16570 | Asia_W_Europe        | H1bj          | H           | H            | 12             |
| 2955 | JQ704757.1           | JQ704757.1; H23; Asia_W_Europe; 10; A263G; C315CC; A750G           | 16569 | Asia_W_Europe        | H23           | H           | H            | 10             |
| 2956 | JQ704758.1           | JQ704758.1; H10e; Asia_W_Europe; 12; A263G; C309CCT; T310C         | 16570 | Asia_W_Europe        | H10e          | H           | H            | 12             |
| 2957 | JQ704759.1           | JQ704759.1; K1a4a1g; Asia_W; 36; A73G; A263G; C309CCT              | 16570 | Asia_W               | K1a4a1g       | K           | K            | 36             |
| 2958 | JQ704760.1           | JQ704760.1; K1a4d; Asia_W; 36; A73G; A153G; A263G                  | 16572 | Asia_W               | K1a4d         | K           | K            | 36             |
| 2959 | JQ704761.1           | JQ704761.1; K1a4e; Asia_W; 35; A73G; A263G; C309CCT                | 16570 | Asia_W               | K1a4e         | K           | K            | 35             |
| 2960 | JQ704762.1           | JQ704762.1; T2; Asia_W; 30; A73G; A263G; C309CCT                   | 16570 | Asia_W               | T2            | T           | T            | 30             |
| 2961 | JQ704763.1           | JQ704763.1; M1a1a1; Africa_E_Nile Valley; 44; A73G; T195C; A263G   | 16571 | Africa_E_Nile Valley | M1a1a1        | M           | M1           | 44             |
| 2962 | JQ704764.1           | JQ704764.1; K1a4f1; Asia_W; 34; A73G; A263G; C315CC                | 16569 | Asia_W               | K1a4f1        | K           | K            | 34             |
| 2963 | JQ704765.1           | JQ704765.1; I2; Asia_W_SW; 36; A73G; T152C; T199C                  | 16572 | Asia_W_SW            | I2            | I           | I            | 36             |
| 2964 | JQ704766.1           | JQ704766.1; H5a1q; Asia_W_Europe; 14; A263G; C309CCCT; T310C       | 16569 | Asia_W_Europe        | H5a1q         | H           | H            | 14             |
| 2965 | JQ704767.1           | JQ704767.1; V+@72; Europe_S; 14; A263G; C309CCT; T310C             | 16570 | Europe_S             | V+@72         | V           | V            | 14             |
| 2966 | JQ704768.1           | JQ704768.1; I5a1c; Asia_W_SW; 39; A73G; T199C; T204C               | 16563 | Asia_W_SW            | I5a1c         | I           | I            | 39             |
| 2967 | JQ704769.1           | JQ704769.1; U8a1a1; Asia_W_Europe ; 31; A73G; A263G; T282C         | 16570 | Asia_W_Europe        | U8a1a1        | U           | U8           | 31             |
| 2968 | JQ704770.1           | JQ704770.1; K1a4a1; Asia_W; 37; A73G; C150T; A263G                 | 16573 | Asia_W               | K1a4a1        | K           | K            | 37             |
| 2969 | JQ704771.1           | JQ704771.1; U5b2a6; Asia_W_Europe_C; 29; A73G; C150T; A263G        | 16570 | Asia_W_Europe_C      | U5b2a6        | U           | U5           | 29             |
| 2970 | JQ704772.1           | JQ704772.1; U4a2e; Asia_N_Europe_N; 33; A73G; T195C; A263G         | 16570 | Asia_N_Europe_N      | U4a2e         | U           | U4           | 33             |
| 2971 | JQ704773.1           | JQ704773.1; U2e1b1; Asia_S_W_Europe; 39; A73G; T152C; T217C        | 16572 | Asia_S_W_Europe      | U2e1b1        | U           | U2           | 39             |
| 2972 | JQ704774.1           | JQ704774.1; H2a2b; Asia_W_Europe; 8; A200G; A263G; C309CCT         | 16570 | Asia_W_Europe        | H2a2b         | H           | H            | 8              |
| 2973 | JQ704775.1           | JQ704775.1; U8a1a1; Asia_W_Europe ; 31; A73G; A263G; T282C         | 16570 | Asia_W_Europe        | U8a1a1        | U           | U8           | 31             |
| 2974 | JQ704776.1           | JQ704776.1; H1c8; Asia_W_Europe; 14; A263G; C315CC; T477C          | 16569 | Asia_W_Europe        | H1c8          | H           | H            | 14             |
| 2975 | JQ704777.1           | JQ704777.1; J1b1a1+146; Asia_W; 39; A73G; T146C; C242T             | 16569 | Asia_W               | J1b1a1+146    | J           | J            | 39             |
| 2976 | JQ704778.1           | JQ704778.1; U5b1b1+@16192; Asia_W_Europe_C; 28; A73G; C150T; A263G | 16570 | Asia_W_Europe_C      | U5b1b1+@16192 | U           | U5           | 28             |
| 2977 | JQ704779.1           | JQ704779.1; J1c3g; Asia_W; 28; A73G; A263G; C295T                  | 16569 | Asia_W               | J1c3g         | J           | J            | 28             |
| 2978 | JQ704780.1           | JQ704780.1; T2b; Asia_W; 37; A73G; G228A; A263G                    | 16568 | Asia_W               | T2b           | T           | T            | 37             |
| 2979 | JQ704781.1           | JQ704781.1; H1bu; Asia_W_Europe; 11; A263G; C315CC; A750G          | 16569 | Asia_W_Europe        | H1bu          | H           | H            | 11             |
| 2980 | JQ704782.1           | JQ704782.1; H3g1; Asia_W_Europe; 14; T152C; A263G; C315CC          | 16569 | Asia_W_Europe        | H3g1          | H           | H            | 14             |
| 2981 | JQ704783.1           | JQ704783.1; T2b17a; Asia_W; 40; A73G; T152C; A263G                 | 16570 | Asia_W               | T2b17a        | T           | T            | 40             |
| 2982 | JQ704784.1           | JQ704784.1; H1b1; Asia_W_Europe; 16; A263G; C309CCCT; T310C        | 16569 | Asia_W_Europe        | H1b1          | H           | H            | 16             |
| 2983 | JQ704785.1           | JQ704785.1; T2b6b; Asia_W; 43; A73G; T146C; A263G                  | 16570 | Asia_W               | T2b6b         | T           | T            | 43             |
| 2984 | JQ704786.1           | JQ704786.1; T2j; Asia_W; 39; A73G; A249d; A263G                    | 16569 | Asia_W               | T2j           | T           | T            | 39             |
| 2985 | JQ704787.1           | JQ704787.1; W1a; Asia_W; 35; A73G; A189G; T195C                    | 16570 | Asia_W               | W1a           | W           | W            | 35             |
| 2986 | JQ704788.1           | JQ704788.1; T2b23a; Asia_W; 44; A73G; A263G; C309CCT               | 16570 | Asia_W               | T2b23a        | T           | T            | 44             |
| 2987 | JQ704789.1           | JQ704789.1; A2ac1; Asia_NE_America_N; 40; C64T; A73G; T146C        | 16568 | Asia_NE_America_N    | A2ac1         | A           | A            | 40             |
| 2988 | JQ704790.1           | JQ704790.1; W1c1; Asia_W; 39; A73G; T119C; A189G                   | 16569 | Asia_W               | W1c1          | W           | W            | 39             |
| 2989 | JQ704791.1           | JQ704791.1; J1b1a1; Asia_W; 35; A73G; C242T; A263G                 | 16569 | Asia_W               | J1b1a1        | J           | J            | 35             |
| 2990 | JQ704792.1           | JQ704792.1; H70; Asia_W_Europe; 11; A73G; A263G; C315CC            | 16569 | Asia_W_Europe        | H70           | H           | H            | 11             |
| 2991 | JQ704793.1           | JQ704793.1; H6a1b3a; Asia_W_Europe; 22; T204C; T239C; A263G        | 16571 | Asia_W_Europe        | H6a1b3a       | H           | H            | 22             |
| 2992 | JQ704794.1           | JQ704794.1; H1bm; Asia_W_Europe; 12; A263G; C309CCT; T310C         | 16570 | Asia_W_Europe        | H1bm          | H           | H            | 12             |
| 2993 | JQ704795.1           | JQ704795.1; H14b2a; Asia_W_Europe; 18; T152C; A197G; A263G         | 16572 | Asia_W_Europe        | H14b2a        | H           | H            | 18             |

**Supplementary Table S3** Human mitochondrial database (hMITO DB v1.0) metadata

| Row  | Name (accession no.) | Description                                                      | Size  | Geo_Region        | Haplogroup | Macro_Haplo | Macro_Haplo2 | Total Variants |
|------|----------------------|------------------------------------------------------------------|-------|-------------------|------------|-------------|--------------|----------------|
| 2994 | JQ704796.1           | JQ704796.1; U5a1a1e; Asia_W_Europe_C; 28; T55C; A73G; A263G      | 16569 | Asia_W_Europe_C   | U5a1a1e    | U           | U5           | 28             |
| 2995 | JQ704797.1           | JQ704797.1; T2a1a6; Asia_W; 37; A73G; A263G; C315CC              | 16569 | Asia_W            | T2a1a6     | T           | T            | 37             |
| 2996 | JQ704798.1           | JQ704798.1; H14b; Asia_W_Europe; 13; A263G; C309CCCT; T310C      | 16571 | Asia_W_Europe     | H14b       | H           | H            | 13             |
| 2997 | JQ704799.1           | JQ704799.1; HV9b; Asia_W; 15; A263G; C309CCT; T310C              | 16570 | Asia_W            | HV9b       | HV          | HV           | 15             |
| 2998 | JQ704800.1           | JQ704800.1; U6a3a1; Asia_SW_Africa_N; 29; A73G; A263G; C315CC    | 16567 | Asia_SW_Africa_N  | U6a3a1     | U           | U6           | 29             |
| 2999 | JQ704801.1           | JQ704801.1; T1a1c; Asia_W; 37; A73G; T152C; T195C                | 16570 | Asia_W            | T1a1c      | T           | T            | 37             |
| 3000 | JQ704802.1           | JQ704802.1; H2a2a1; Asia_W_Europe; 1; C315CC; ;                  | 16569 | Asia_W_Europe     | H2a2a1     | H           | H            | 1              |
| 3001 | JQ704803.1           | JQ704803.1; J1c3g; Asia_W; 30; A73G; G185A; A263G                | 16570 | Asia_W            | J1c3g      | J           | J            | 30             |
| 3002 | JQ704804.1           | JQ704804.1; R6a2; Asia_S_SE; 27; A73G; G228A; A263G              | 16570 | Asia_S_SE         | R6a2       | R           | R6           | 27             |
| 3003 | JQ704805.1           | JQ704805.1; H1e1a; Asia_W_Europe; 14; A263G; C315CC; A750G       | 16569 | Asia_W_Europe     | H1e1a      | H           | H            | 14             |
| 3004 | JQ704806.1           | JQ704806.1; M7b1a1f; Asia_E_SE; 44; A73G; C150T; T199C           | 16570 | Asia_E_SE         | M7b1a1f    | M           | M7           | 44             |
| 3005 | JQ704807.1           | JQ704807.1; T2f1a; Asia_W; 41; A73G; T195C; A263G                | 16562 | Asia_W            | T2f1a      | T           | T            | 41             |
| 3006 | JQ704808.1           | JQ704808.1; K1a4a1; Asia_W; 36; A73G; T146C; A263G               | 16569 | Asia_W            | K1a4a1     | K           | K            | 36             |
| 3007 | JQ704809.1           | JQ704809.1; J1d3a2; Asia_W; 35; A73G; T152C; A263G               | 16569 | Asia_W            | J1d3a2     | J           | J            | 35             |
| 3008 | JQ704810.1           | JQ704810.1; H1b1+16362; Asia_W_Europe; 13; A263G; C315CC; CA522d | 16567 | Asia_W_Europe     | H1b1+16362 | H           | H            | 13             |
| 3009 | JQ704811.1           | JQ704811.1; U4a2f; Asia_N_Europe_N; 34; A73G; T195C; C198T       | 16568 | Asia_N_Europe_N   | U4a2f      | U           | U4           | 34             |
| 3010 | JQ704812.1           | JQ704812.1; K1a1b1a; Asia_W; 36; A73G; C114T; A263G              | 16569 | Asia_W            | K1a1b1a    | K           | K            | 36             |
| 3011 | JQ704813.1           | JQ704813.1; H71; Asia_W_Europe; 11; A263G; C315CC; A750G         | 16569 | Asia_W_Europe     | H71        | H           | H            | 11             |
| 3012 | JQ704814.1           | JQ704814.1; H13a1a; Asia_W_Europe; 14; A263G; C315CC; A750G      | 16569 | Asia_W_Europe     | H13a1a     | H           | H            | 14             |
| 3013 | JQ704815.1           | JQ704815.1; A14; Asia_NE_America_N; 31; A73G; C151T; T152C       | 16567 | Asia_NE_America_N | A14        | A           | A            | 31             |
| 3014 | JQ704816.1           | JQ704816.1; J1c5c; Asia_W; 31; A73G; G185A; G228A                | 16567 | Asia_W            | J1c5c      | J           | J            | 31             |
| 3015 | JQ704817.1           | JQ704817.1; U2e1a1c; Asia_S_W_Europe; 42; A73G; T152C; T217C     | 16572 | Asia_S_W_Europe   | U2e1a1c    | U           | U2           | 42             |
| 3016 | JQ704818.1           | JQ704818.1; T2e; Asia_W; 34; A73G; C150T; A263G                  | 16570 | Asia_W            | T2e        | T           | T            | 34             |
| 3017 | JQ704819.1           | JQ704819.1; H1+152; Asia_W_Europe; 15; T152C; A263G; C315CC      | 16569 | Asia_W_Europe     | H1+152     | H           | H            | 15             |
| 3018 | JQ704820.1           | JQ704820.1; U5b2c2b; Asia_W_Europe_C; 35; A73G; C150T; A263G     | 16571 | Asia_W_Europe_C   | U5b2c2b    | U           | U5           | 35             |
| 3019 | JQ704821.1           | JQ704821.1; T2a1b2a; Asia_W; 43; A73G; A263G; C315CC             | 16571 | Asia_W            | T2a1b2a    | T           | T            | 43             |
| 3020 | JQ704822.1           | JQ704822.1; K2a; Asia_W; 33; C64T; A73G; T146C                   | 16569 | Asia_W            | K2a        | K           | K            | 33             |
| 3021 | JQ704823.1           | JQ704823.1; U5a1a1; Asia_W_Europe_C; 32; A73G; T195C; A263G      | 16570 | Asia_W_Europe_C   | U5a1a1     | U           | U5           | 32             |
| 3022 | JQ704824.1           | JQ704824.1; H1; Asia_W_Europe; 10; A263G; C315CC; A750G          | 16569 | Asia_W_Europe     | H1         | H           | H            | 10             |
| 3023 | JQ704825.1           | JQ704825.1; L1b1a7a; Africa_C; 81; A73G; T152C; C182T            | 16567 | Africa_C          | L1b1a7a    | L1          | L1           | 81             |
| 3024 | JQ704826.1           | JQ704826.1; V9a2; Europe_S; 20; T72C; G207A; A263G               | 16570 | Europe_S          | V9a2       | V           | V            | 20             |
| 3025 | JQ704827.1           | JQ704827.1; H27a; Asia_W_Europe; 14; A263G; C315CC; A750G        | 16569 | Asia_W_Europe     | H27a       | H           | H            | 14             |
| 3026 | JQ704828.1           | JQ704828.1; W1c1; Asia_W; 41; A73G; A189G; T195C                 | 16569 | Asia_W            | W1c1       | W           | W            | 41             |
| 3027 | JQ704829.1           | JQ704829.1; J1c2I; Asia_W; 34; A73G; G185A; A188G                | 16569 | Asia_W            | J1c2I      | J           | J            | 34             |
| 3028 | JQ704830.1           | JQ704830.1; K1a3a3; Asia_W; 37; A73G; A263G; C309CCCT            | 16570 | Asia_W            | K1a3a3     | K           | K            | 37             |
| 3029 | JQ704831.1           | JQ704831.1; H81a; Asia_W_Europe; 14; A263G; C315CC; A750G        | 16569 | Asia_W_Europe     | H81a       | H           | H            | 14             |
| 3030 | JQ704832.1           | JQ704832.1; H1c3; Asia_W_Europe; 14; A257G; A263G; C315CC        | 16569 | Asia_W_Europe     | H1c3       | H           | H            | 14             |
| 3031 | JQ704833.1           | JQ704833.1; V14; Europe_S; 15; T72C; A263G; C309CCCT             | 16570 | Europe_S          | V14        | V           | V            | 15             |
| 3032 | JQ704834.1           | JQ704834.1; H3a; Asia_W_Europe; 13; T152C; A263G; C309CCCT       | 16571 | Asia_W_Europe     | H3a        | H           | H            | 13             |
| 3033 | JQ704835.1           | JQ704835.1; H72; Asia_W_Europe; 12; A263G; C309CCCT; T310C       | 16570 | Asia_W_Europe     | H72        | H           | H            | 12             |
| 3034 | JQ704836.1           | JQ704836.1; K1c1; Asia_W; 37; A73G; T146C; T152C                 | 16569 | Asia_W            | K1c1       | K           | K            | 37             |

**Supplementary Table S3** Human mitochondrial database (hMITO DB v1.0) metadata

| Row  | Name (accession no.) | Description                                                      | Size  | Geo_Region       | Haplogroup  | Macro_Haplo | Macro_Haplo2 | Total Variants |
|------|----------------------|------------------------------------------------------------------|-------|------------------|-------------|-------------|--------------|----------------|
| 3035 | JQ704837.1           | JQ704837.1; I3a1; Asia_W_SW; 39; A73G; T152C; T199C              | 16578 | Asia_W_SW        | I3a1        | I           | I            | 39             |
| 3036 | JQ704838.1           | JQ704838.1; H1a3a2; Asia_W_Europe; 14; T42TG; A73G; A263G        | 16570 | Asia_W_Europe    | H1a3a2      | H           | H            | 14             |
| 3037 | JQ704839.1           | JQ704839.1; H1+16239; Asia_W_Europe; 11; A263G; C315CC; A750G    | 16569 | Asia_W_Europe    | H1+16239    | H           | H            | 11             |
| 3038 | JQ704840.1           | JQ704840.1; J1c3e2; Asia_W; 35; A73G; T152C; G185A               | 16570 | Asia_W           | J1c3e2      | J           | J            | 35             |
| 3039 | JQ704841.1           | JQ704841.1; H13a1a1d1; Asia_W_Europe; 19; A263G; C309CCCT; T310C | 16571 | Asia_W_Europe    | H13a1a1d1   | H           | H            | 19             |
| 3040 | JQ704842.1           | JQ704842.1; H2a2a1d; Asia_W_Europe; 3; C309CCCT; T310C; T16172C  | 16571 | Asia_W_Europe    | H2a2a1d     | H           | H            | 3              |
| 3041 | JQ704843.1           | JQ704843.1; K2a5a1; Asia_W; 37; A73G; T146C; T152C               | 16570 | Asia_W           | K2a5a1      | K           | K            | 37             |
| 3042 | JQ704844.1           | JQ704844.1; H1c1; Asia_W_Europe; 13; A263G; C315CC; T477C        | 16569 | Asia_W_Europe    | H1c1        | H           | H            | 13             |
| 3043 | JQ704845.1           | JQ704845.1; H3; Asia_W_Europe; 10; A263G; C315CC; A750G          | 16569 | Asia_W_Europe    | H3          | H           | H            | 10             |
| 3044 | JQ704846.1           | JQ704846.1; H11a; Asia_W_Europe; 15; T195C; A263G; C309CCCT      | 16571 | Asia_W_Europe    | H11a        | H           | H            | 15             |
| 3045 | JQ704847.1           | JQ704847.1; H2a1e1b; Asia_W_Europe; 13; A263G; C309CCCT; T310C   | 16572 | Asia_W_Europe    | H2a1e1b     | H           | H            | 13             |
| 3046 | JQ704848.1           | JQ704848.1; H6b1; Asia_W_Europe; 20; C44CC; T152C; A214G         | 16572 | Asia_W_Europe    | H6b1        | H           | H            | 20             |
| 3047 | JQ704849.1           | JQ704849.1; H1; Asia_W_Europe; 16; C150T; A263G; C309CCCT        | 16568 | Asia_W_Europe    | H1          | H           | H            | 16             |
| 3048 | JQ704850.1           | JQ704850.1; H7b4; Asia_W_Europe; 14; A263G; C309CCCT; T310C      | 16572 | Asia_W_Europe    | H7b4        | H           | H            | 14             |
| 3049 | JQ704851.1           | JQ704851.1; H4a1a2a1; Asia_W_Europe; 22; A263G; C309CCCT; T310C  | 16569 | Asia_W_Europe    | H4a1a2a1    | H           | H            | 22             |
| 3050 | JQ704852.1           | JQ704852.1; H1; Asia_W_Europe; 13; A263G; C309CCCT; T310C        | 16571 | Asia_W_Europe    | H1          | H           | H            | 13             |
| 3051 | JQ704853.1           | JQ704853.1; H63a; Asia_W_Europe; 13; C64T; A263G; C315CC         | 16569 | Asia_W_Europe    | H63a        | H           | H            | 13             |
| 3052 | JQ704854.1           | JQ704854.1; V1a1; Europe_S; 18; T72C; A263G; C309CCCT            | 16570 | Europe_S         | V1a1        | V           | V            | 18             |
| 3053 | JQ704855.1           | JQ704855.1; H26a1a1; Asia_W_Europe; 15; T196C; A263G; C309CCCT   | 16571 | Asia_W_Europe    | H26a1a1     | H           | H            | 15             |
| 3054 | JQ704856.1           | JQ704856.1; H48; Asia_W_Europe; 10; A235G; A263G; C315CC         | 16569 | Asia_W_Europe    | H48         | H           | H            | 10             |
| 3055 | JQ704857.1           | JQ704857.1; H52; Asia_W_Europe; 13; T152C; A263G; C309CCCT       | 16570 | Asia_W_Europe    | H52         | H           | H            | 13             |
| 3056 | JQ704858.1           | JQ704858.1; H50; Asia_W_Europe; 12; A263G; C309CCCT; T310C       | 16570 | Asia_W_Europe    | H50         | H           | H            | 12             |
| 3057 | JQ704859.1           | JQ704859.1; X2b12; Asia_W_America_N; 32; A73G; A153G; T195C      | 16570 | Asia_W_America_N | X2b12       | X           | X            | 32             |
| 3058 | JQ704860.1           | JQ704860.1; H10+(16093); Asia_W_Europe; 12; A188G; A197G; C315CC | 16569 | Asia_W_Europe    | H10+(16093) | H           | H            | 12             |
| 3059 | JQ704861.1           | JQ704861.1; H1c1a; Asia_W_Europe; 13; A263G; C315CC; T477C       | 16569 | Asia_W_Europe    | H1c1a       | H           | H            | 13             |
| 3060 | JQ704862.1           | JQ704862.1; U5b2a1b; Asia_W_Europe_C; 32; A73G; C150T; T152C     | 16569 | Asia_W_Europe_C  | U5b2a1b     | U           | U5           | 32             |
| 3061 | JQ704863.1           | JQ704863.1; H5b2; Asia_W_Europe; 14; A263G; C309CCCT; T310C      | 16571 | Asia_W_Europe    | H5b2        | H           | H            | 14             |
| 3062 | JQ704864.1           | JQ704864.1; H7; Asia_W_Europe; 13; T152C; A263G; C309CCCT        | 16574 | Asia_W_Europe    | H7          | H           | H            | 13             |
| 3063 | JQ704865.1           | JQ704865.1; H69; Asia_W_Europe; 11; T152C; A263G; C315CC         | 16569 | Asia_W_Europe    | H69         | H           | H            | 11             |
| 3064 | JQ704866.1           | JQ704866.1; X2k; Asia_W_America_N; 27; A73G; A153G; T195C        | 16567 | Asia_W_America_N | X2k         | X           | X            | 27             |
| 3065 | JQ704867.1           | JQ704867.1; J1c1c; Asia_W; 34; A73G; C150T; G185A                | 16568 | Asia_W           | J1c1c       | J           | J            | 34             |
| 3066 | JQ704868.1           | JQ704868.1; H34; Asia_W_Europe; 14; T152C; A263G; C315CC         | 16569 | Asia_W_Europe    | H34         | H           | H            | 14             |
| 3067 | JQ704869.1           | JQ704869.1; T2b4+152; Asia_W; 35; A73G; T152C; A263G             | 16570 | Asia_W           | T2b4+152    | T           | T            | 35             |
| 3068 | JQ704870.1           | JQ704870.1; H15b; Asia_W_Europe; 13; T55C; T57C; A263G           | 16571 | Asia_W_Europe    | H15b        | H           | H            | 13             |
| 3069 | JQ704871.1           | JQ704871.1; N1a1a1a3; Africa_NE_Asia_W; 40; A73G; T152C; T199C   | 16572 | Africa_NE_Asia_W | N1a1a1a3    | N           | N1           | 40             |
| 3070 | JQ704872.1           | JQ704872.1; H1+16189; Asia_W_Europe; 10; A263G; C315CC; A750G    | 16569 | Asia_W_Europe    | H1+16189    | H           | H            | 10             |
| 3071 | JQ704873.1           | JQ704873.1; K1a4a1a+195; Asia_W; 39; A73G; T195C; A263G          | 16571 | Asia_W           | K1a4a1a+195 | K           | K            | 39             |
| 3072 | JQ704874.1           | JQ704874.1; H2a2a1; Asia_W_Europe; 6; T152C; C309CCCT; T310C     | 16571 | Asia_W_Europe    | H2a2a1      | H           | H            | 6              |
| 3073 | JQ704875.1           | JQ704875.1; U5b1a; Asia_W_Europe_C; 28; A73G; C150T; A263G       | 16572 | Asia_W_Europe_C  | U5b1a       | U           | U5           | 28             |
| 3074 | JQ704876.1           | JQ704876.1; H40; Asia_W_Europe; 12; A263G; C309CCCT; T310C       | 16572 | Asia_W_Europe    | H40         | H           | H            | 12             |
| 3075 | JQ704877.1           | JQ704877.1; H1a; Asia_W_Europe; 13; A73G; A263G; C309CCCT        | 16570 | Asia_W_Europe    | H1a         | H           | H            | 13             |

**Supplementary Table S3** Human mitochondrial database (hMITO DB v1.0) metadata

| Row  | Name (accession no.) | Description                                                         | Size  | Geo_Region            | Haplogroup | Macro_Haplo | Macro_Haplo2 | Total Variants |
|------|----------------------|---------------------------------------------------------------------|-------|-----------------------|------------|-------------|--------------|----------------|
| 3076 | JQ704878.1           | JQ704878.1; A2+(64); Asia_NE_America_N; 37; C64T; A73G; T131C       | 16567 | Asia_NE_America_N     | A2+(64)    | A           | A            | 37             |
| 3077 | JQ704879.1           | JQ704879.1; K2a; Asia_W; 31; A73G; T146C; T152C                     | 16569 | Asia_W                | K2a        | K           | K            | 31             |
| 3078 | JQ704880.1           | JQ704880.1; H1a1; Asia_W_Europe; 15; A73G; A263G; C315CC            | 16569 | Asia_W_Europe         | H1a1       | H           | H            | 15             |
| 3079 | JQ704881.1           | JQ704881.1; H1b; Asia_W_Europe; 14; A263G; C309CCCT; T310C          | 16571 | Asia_W_Europe         | H1b        | H           | H            | 14             |
| 3080 | JQ704882.1           | JQ704882.1; H1b2a; Asia_W_Europe; 17; A183G; A263G; C309CCCT        | 16571 | Asia_W_Europe         | H1b2a      | H           | H            | 17             |
| 3081 | JQ704883.1           | JQ704883.1; H4a1a+195; Asia_W_Europe; 20; T195C; A263G; C309CCCT    | 16569 | Asia_W_Europe         | H4a1a+195  | H           | H            | 20             |
| 3082 | JQ704884.1           | JQ704884.1; C1b11; Asia_NE_America_N_S; 50; T72C; A73G; C194T       | 16565 | Asia_NE_America_N_S   | C1b11      | C           | C            | 50             |
| 3083 | JQ704885.1           | JQ704885.1; H5b; Asia_W_Europe; 12; A263G; C309CCT; T310C           | 16570 | Asia_W_Europe         | H5b        | H           | H            | 12             |
| 3084 | JQ704886.1           | JQ704886.1; H5a1g1a; Asia_W_Europe; 18; A263G; C315CC; A444G        | 16567 | Asia_W_Europe         | H5a1g1a    | H           | H            | 18             |
| 3085 | JQ704887.1           | JQ704887.1; H3r; Asia_W_Europe; 12; A263G; C315CC; A750G            | 16569 | Asia_W_Europe         | H3r        | H           | H            | 12             |
| 3086 | JQ704888.1           | JQ704888.1; H27a; Asia_W_Europe; 14; A263G; C309CCT; T310C          | 16570 | Asia_W_Europe         | H27a       | H           | H            | 14             |
| 3087 | JQ704889.1           | JQ704889.1; H6a1b4; Asia_W_Europe; 17; T152C; T239C; A263G          | 16570 | Asia_W_Europe         | H6a1b4     | H           | H            | 17             |
| 3088 | JQ704890.1           | JQ704890.1; H7b; Asia_W_Europe; 17; T195C; A263G; C309CCCT          | 16571 | Asia_W_Europe         | H7b        | H           | H            | 17             |
| 3089 | JQ704891.1           | JQ704891.1; J1c8a; Asia_W; 35; A73G; G185A; G228A                   | 16574 | Asia_W                | J1c8a      | J           | J            | 35             |
| 3090 | JQ704892.1           | JQ704892.1; B4c1a1a; Asia_SE_E_America_N_S; 30; A73G; T146C; A263G  | 16564 | Asia_SE_E_America_N_S | B4c1a1a    | B           | B            | 30             |
| 3091 | JQ704893.1           | JQ704893.1; N1b1b1; Africa_NE_Asia_W; 40; A73G; T152C; A263G        | 16570 | Africa_NE_Asia_W      | N1b1b1     | N           | N1           | 40             |
| 3092 | JQ704894.1           | JQ704894.1; H1b2a1; Asia_W_Europe; 18; A183G; A263G; C309CCCT       | 16571 | Asia_W_Europe         | H1b2a1     | H           | H            | 18             |
| 3093 | JQ704895.1           | JQ704895.1; U5a2b4a; Asia_W_Europe_C; 26; A73G; A263G; C309CCT      | 16570 | Asia_W_Europe_C       | U5a2b4a    | U           | U5           | 26             |
| 3094 | JQ704896.1           | JQ704896.1; U6b1a; Asia_SW_Africa_N; 26; A73G; A263G; C315CC        | 16569 | Asia_SW_Africa_N      | U6b1a      | U           | U6           | 26             |
| 3095 | JQ704897.1           | JQ704897.1; T2b; Asia_W; 38; A73G; T204C; G207A                     | 16570 | Asia_W                | T2b        | T           | T            | 38             |
| 3096 | JQ704898.1           | JQ704898.1; H; Asia_W_Europe; 10; A263G; C315CC; A750G              | 16569 | Asia_W_Europe         | H          | H           | H            | 10             |
| 3097 | JQ704899.1           | JQ704899.1; H26c; Asia_W_Europe; 12; T146C; A263G; C315CC           | 16569 | Asia_W_Europe         | H26c       | H           | H            | 12             |
| 3098 | JQ704900.1           | JQ704900.1; K2b1b; Asia_W; 38; A73G; T146C; T195C                   | 16569 | Asia_W                | K2b1b      | K           | K            | 38             |
| 3099 | JQ704901.1           | JQ704901.1; V+@72; Europe_S; 18; A263G; C315CC; CA522d              | 16567 | Europe_S              | V+@72      | V           | V            | 18             |
| 3100 | JQ704902.1           | JQ704902.1; C1c1b; Asia_NE_America_N_S; 44; A73G; A215G; A249d      | 16567 | Asia_NE_America_N_S   | C1c1b      | C           | C            | 44             |
| 3101 | JQ704903.1           | JQ704903.1; H3v; Asia_W_Europe; 11; A263G; C309CCT; T310C           | 16570 | Asia_W_Europe         | H3v        | H           | H            | 11             |
| 3102 | JQ704904.1           | JQ704904.1; K1c2; Asia_W; 38; A73G; T146C; T152C                    | 16568 | Asia_W                | K1c2       | K           | K            | 38             |
| 3103 | JQ704905.1           | JQ704905.1; H1e2; Asia_W_Europe; 13; A263G; C315CC; A750G           | 16569 | Asia_W_Europe         | H1e2       | H           | H            | 13             |
| 3104 | JQ704906.1           | JQ704906.1; J2a1a1a2; Asia_W; 41; A73G; C150T; T152C                | 16570 | Asia_W                | J2a1a1a2   | J           | J            | 41             |
| 3105 | JQ704907.1           | JQ704907.1; K1a+195; Asia_W; 31; A73G; T195C; A263G                 | 16573 | Asia_W                | K1a+195    | K           | K            | 31             |
| 3106 | JQ704908.1           | JQ704908.1; J1c1b2a; Asia_W; 35; A73G; G228A; A263G                 | 16567 | Asia_W                | J1c1b2a    | J           | J            | 35             |
| 3107 | JQ704909.1           | JQ704909.1; H1c15; Asia_W_Europe; 14; T152C; A263G; C309CCT         | 16573 | Asia_W_Europe         | H1c15      | H           | H            | 14             |
| 3108 | JQ704910.1           | JQ704910.1; H6a1b2; Asia_W_Europe; 18; T239C; A263G; C309CCT        | 16572 | Asia_W_Europe         | H6a1b2     | H           | H            | 18             |
| 3109 | JQ704911.1           | JQ704911.1; T2b4a; Asia_W; 36; A73G; A263G; C309CCT                 | 16570 | Asia_W                | T2b4a      | T           | T            | 36             |
| 3110 | JQ704912.1           | JQ704912.1; K2a7; Asia_W; 35; A73G; T146C; T152C                    | 16568 | Asia_W                | K2a7       | K           | K            | 35             |
| 3111 | JQ704913.1           | JQ704913.1; H1b1e; Asia_W_Europe; 14; A263G; C315CC; A750G          | 16569 | Asia_W_Europe         | H1b1e      | H           | H            | 14             |
| 3112 | JQ704914.1           | JQ704914.1; H1cf; Asia_W_Europe; 14; A263G; C315CC; A750G           | 16569 | Asia_W_Europe         | H1cf       | H           | H            | 14             |
| 3113 | JQ704915.1           | JQ704915.1; U5a1a1; Asia_W_Europe_C; 29; A73G; A263G; C309CCCT      | 16571 | Asia_W_Europe_C       | U5a1a1     | U           | U5           | 29             |
| 3114 | JQ704916.1           | JQ704916.1; H1f1a; Asia_W_Europe; 17; A263G; C315CC; C459d(=C456d+) | 16568 | Asia_W_Europe         | H1f1a      | H           | H            | 17             |
| 3115 | JQ704917.1           | JQ704917.1; L3e2b1a1; Africa_E; 37; A73G; C150T; T195C              | 16571 | Africa_E              | L3e2b1a1   | L3          | L3           | 37             |
| 3116 | JQ704918.1           | JQ704918.1; U5a1h; Asia_W_Europe_C; 34; A73G; C150T; A263G          | 16569 | Asia_W_Europe_C       | U5a1h      | U           | U5           | 34             |

**Supplementary Table S3** Human mitochondrial database (hMITO DB v1.0) metadata

| Row  | Name (accession no.) | Description                                                         | Size  | Geo_Region            | Haplogroup   | Macro_Haplo | Macro_Haplo2 | Total Variants |
|------|----------------------|---------------------------------------------------------------------|-------|-----------------------|--------------|-------------|--------------|----------------|
| 3117 | JQ704919.1           | JQ704919.1; L3b3; Africa_E; 41; A73G; C150T; G185A                  | 16566 | Africa_E              | L3b3         | L3          | L3           | 41             |
| 3118 | JQ704920.1           | JQ704920.1; U5a1a1+16362; Asia_W_Europe_C; 33; A73G; A263G; C309CCT | 16573 | Asia_W_Europe_C       | U5a1a1+16362 | U           | U5           | 33             |
| 3119 | JQ704921.1           | JQ704921.1; U5b2a1a1; Asia_W_Europe_C; 29; A73G; C150T; A263G       | 16569 | Asia_W_Europe_C       | U5b2a1a1     | U           | U5           | 29             |
| 3120 | JQ704922.1           | JQ704922.1; B4a1a1c; Asia_SE_E_America_N_S; 30; A73G; T146C; A263G  | 16560 | Asia_SE_E_America_N_S | B4a1a1c      | B           | B            | 30             |
| 3121 | JQ704923.1           | JQ704923.1; HV0+195; Asia_W; 18; C64T; T72C; T195C                  | 16570 | Asia_W                | HV0+195      | HV          | HV           | 18             |
| 3122 | JQ704924.1           | JQ704924.1; K1a24a; Asia_W; 37; A73G; C150T; T195C                  | 16567 | Asia_W                | K1a24a       | K           | K            | 37             |
| 3123 | JQ704925.1           | JQ704925.1; T2b4b; Asia_W; 37; A73G; T152C; A263G                   | 16570 | Asia_W                | T2b4b        | T           | T            | 37             |
| 3124 | JQ704926.1           | JQ704926.1; X2b+226; Asia_W_America_N; 34; A73G; A153G; A188G       | 16572 | Asia_W_America_N      | X2b+226      | X           | X            | 34             |
| 3125 | JQ704927.1           | JQ704927.1; H1a3b; Asia_W_Europe; 14; A73G; A263G; C315CC           | 16567 | Asia_W_Europe         | H1a3b        | H           | H            | 14             |
| 3126 | JQ704928.1           | JQ704928.1; H13a1a; Asia_W_Europe; 14; A263G; C309CCT; T310C        | 16570 | Asia_W_Europe         | H13a1a       | H           | H            | 14             |
| 3127 | JQ704929.1           | JQ704929.1; V; Europe_S; 16; T72C; A263G; C309CCT                   | 16570 | Europe_S              | V            | V           | V            | 16             |
| 3128 | JQ704930.1           | JQ704930.1; U5a1a1; Asia_W_Europe_C; 29; A73G; A263G; C315CC        | 16569 | Asia_W_Europe_C       | U5a1a1       | U           | U5           | 29             |
| 3129 | JQ704931.1           | JQ704931.1; L3e3b1; Africa_E; 41; A73G; C150T; T195C                | 16567 | Africa_E              | L3e3b1       | L3          | L3           | 41             |
| 3130 | JQ704932.1           | JQ704932.1; H3b1b; Asia_W_Europe; 16; A153G; A263G; C309CCT         | 16570 | Asia_W_Europe         | H3b1b        | H           | H            | 16             |
| 3131 | JQ704933.1           | JQ704933.1; K2b1a3; Asia_W; 35; A73G; T146C; A263G                  | 16569 | Asia_W                | K2b1a3       | K           | K            | 35             |
| 3132 | JQ704934.1           | JQ704934.1; H1c3b; Asia_W_Europe; 16; A257G; A263G; C309CCCT        | 16571 | Asia_W_Europe         | H1c3b        | H           | H            | 16             |
| 3133 | JQ704935.1           | JQ704935.1; J1c2; Asia_W; 32; A73G; G185A; A188G                    | 16568 | Asia_W                | J1c2         | J           | J            | 32             |
| 3134 | JQ704936.1           | JQ704936.1; I2; Asia_W_SW; 40; A73G; T152C; T199C                   | 16573 | Asia_W_SW             | I2           | I           | I            | 40             |
| 3135 | JQ704937.1           | JQ704937.1; J1c; Asia_W; 30; A73G; C150T; G185A                     | 16569 | Asia_W                | J1c          | J           | J            | 30             |
| 3136 | JQ704938.1           | JQ704938.1; H15a1; Asia_W_Europe; 17; T55C; T57C; A263G             | 16570 | Asia_W_Europe         | H15a1        | H           | H            | 17             |
| 3137 | JQ704939.1           | JQ704939.1; H2a1c; Asia_W_Europe; 12; A263G; C309CCCT; T310C        | 16571 | Asia_W_Europe         | H2a1c        | H           | H            | 12             |
| 3138 | JQ704940.1           | JQ704940.1; H61; Asia_W_Europe; 12; A73G; A263G; C315CC             | 16569 | Asia_W_Europe         | H61          | H           | H            | 12             |
| 3139 | JQ704941.1           | JQ704941.1; U5a1b1a; Asia_W_Europe_C; 30; A73G; A263G; A272G        | 16569 | Asia_W_Europe_C       | U5a1b1a      | U           | U5           | 30             |
| 3140 | JQ704942.1           | JQ704942.1; J1b1a1; Asia_W; 36; A73G; C242T; A263G                  | 16569 | Asia_W                | J1b1a1       | J           | J            | 36             |
| 3141 | JQ704943.1           | JQ704943.1; H1a; Asia_W_Europe; 15; A73G; A263G; C309CCT            | 16570 | Asia_W_Europe         | H1a          | H           | H            | 15             |
| 3142 | JQ704944.1           | JQ704944.1; K1a9; Asia_W; 32; A73G; T195C; A263G                    | 16569 | Asia_W                | K1a9         | K           | K            | 32             |
| 3143 | JQ704945.1           | JQ704945.1; V21; Europe_S; 16; T152C; A263G; C309CCCT               | 16571 | Europe_S              | V21          | V           | V            | 16             |
| 3144 | JQ704946.1           | JQ704946.1; J1c2g; Asia_W; 32; A73G; G185A; A188G                   | 16569 | Asia_W                | J1c2g        | J           | J            | 32             |
| 3145 | JQ704947.1           | JQ704947.1; J2a1a1; Asia_W; 41; A73G; C150T; T152C                  | 16570 | Asia_W                | J2a1a1       | J           | J            | 41             |
| 3146 | JQ704948.1           | JQ704948.1; K1a4a1b2; Asia_W; 40; A73G; A263G; C309CCCT             | 16571 | Asia_W                | K1a4a1b2     | K           | K            | 40             |
| 3147 | JQ704949.1           | JQ704949.1; H56; Asia_W_Europe; 13; A263G; C309CCT; T310C           | 16570 | Asia_W_Europe         | H56          | H           | H            | 13             |
| 3148 | JQ704950.1           | JQ704950.1; U3a1a1; Africa_NE_Asia_W; 37; A73G; C150T; A263G        | 16571 | Africa_NE_Asia_W      | U3a1a1       | U           | U3           | 37             |
| 3149 | JQ704951.1           | JQ704951.1; K1c2; Asia_W; 37; A73G; T146C; T152C                    | 16568 | Asia_W                | K1c2         | K           | K            | 37             |
| 3150 | JQ704952.1           | JQ704952.1; H; Asia_W_Europe; 17; A200G; G225A; A227G               | 16571 | Asia_W_Europe         | H            | H           | H            | 17             |
| 3151 | JQ704953.1           | JQ704953.1; H17; Asia_W_Europe; 14; T152C; A263G; C309CCCT          | 16571 | Asia_W_Europe         | H17          | H           | H            | 14             |
| 3152 | JQ704954.1           | JQ704954.1; H1; Asia_W_Europe; 12; A263G; C309CCT; T310C            | 16569 | Asia_W_Europe         | H1           | H           | H            | 12             |
| 3153 | JQ704955.1           | JQ704955.1; H10c; Asia_W_Europe; 12; A263G; C309CCCT; T310C         | 16571 | Asia_W_Europe         | H10c         | H           | H            | 12             |
| 3154 | JQ704956.1           | JQ704956.1; D4b2b7; Asia_E_America_N_S; 42; A73G; C194T; A263G      | 16567 | Asia_E_America_N_S    | D4b2b7       | D           | D            | 42             |
| 3155 | JQ704957.1           | JQ704957.1; H1af1b; Asia_W_Europe; 13; A73G; A263G; C315CC          | 16569 | Asia_W_Europe         | H1af1b       | H           | H            | 13             |
| 3156 | JQ704958.1           | JQ704958.1; H3b1a; Asia_W_Europe; 16; A263G; C315CC; A750G          | 16569 | Asia_W_Europe         | H3b1a        | H           | H            | 16             |
| 3157 | JQ704959.1           | JQ704959.1; X2b+226; Asia_W_America_N; 29; A73G; A153G; T195C       | 16569 | Asia_W_America_N      | X2b+226      | X           | X            | 29             |

**Supplementary Table S3** Human mitochondrial database (hMITO DB v1.0) metadata

| Row  | Name (accession no.) | Description                                                                   | Size  | Geo_Region         | Haplogroup   | Macro_Haplo | Macro_Haplo2 | Total Variants |
|------|----------------------|-------------------------------------------------------------------------------|-------|--------------------|--------------|-------------|--------------|----------------|
| 3158 | JQ704960.1           | JQ704960.1; V; Europe_S; 14; T72C; A263G; C309CCT                             | 16570 | Europe_S           | V            | V           | V            | 14             |
| 3159 | JQ704961.1           | JQ704961.1; U5a1a1+16362; Asia_W_Europe_C; 29; A73G; T204C; A263G             | 16570 | Asia_W_Europe_C    | U5a1a1+16362 | U           | U5           | 29             |
| 3160 | JQ704962.1           | JQ704962.1; U5a1f1a; Asia_W_Europe_C; 33; A73G; T199C; A263G                  | 16569 | Asia_W_Europe_C    | U5a1f1a      | U           | U5           | 33             |
| 3161 | JQ704963.1           | JQ704963.1; K1a4d; Asia_W; 36; A73G; A263G; C315CC                            | 16571 | Asia_W             | K1a4d        | K           | K            | 36             |
| 3162 | JQ704964.1           | JQ704964.1; U8a1a1; Asia_W_Europe ; 29; A73G; A263G; T282C                    | 16569 | Asia_W_Europe      | U8a1a1       | U           | U8           | 29             |
| 3163 | JQ704965.1           | JQ704965.1; J1c2d; Asia_W; 33; A73G; G185A; A188G                             | 16568 | Asia_W             | J1c2d        | J           | J            | 33             |
| 3164 | JQ704966.1           | JQ704966.1; HV+16311; Asia_W_Europe; 17; A263G; C309CCCT; T310C               | 16571 | Asia_W_Europe      | HV+16311     | H           | H            | 17             |
| 3165 | JQ704967.1           | JQ704967.1; T1a1; Asia_W; 36; A73G; T152C; T195C                              | 16570 | Asia_W             | T1a1         | T           | T            | 36             |
| 3166 | JQ704968.1           | JQ704968.1; L1b1a8; Africa_C; 78; A73G; T152C; C182T                          | 16567 | Africa_C           | L1b1a8       | L1          | L1           | 78             |
| 3167 | JQ704969.1           | JQ704969.1; X2b+226; Asia_W_America_N; 32; A73G; A153G; T195C                 | 16569 | Asia_W_America_N   | X2b+226      | X           | X            | 32             |
| 3168 | JQ704970.1           | JQ704970.1; U8b1b1; Asia_W_Europe ; 29; A73G; T195C; A263G                    | 16570 | Asia_W_Europe      | U8b1b1       | U           | U8           | 29             |
| 3169 | JQ704971.1           | JQ704971.1; U5b3b; Asia_W_Europe_C; 28; A73G; C150T; G228A                    | 16570 | Asia_W_Europe_C    | U5b3b        | U           | U5           | 28             |
| 3170 | JQ704972.1           | JQ704972.1; H17b; Asia_W_Europe; 13; T195C; A263G; C315CC                     | 16570 | Asia_W_Europe      | H17b         | H           | H            | 13             |
| 3171 | JQ704973.1           | JQ704973.1; T2b28; Asia_W; 36; A73G; A153G; A263G                             | 16569 | Asia_W             | T2b28        | T           | T            | 36             |
| 3172 | JQ704974.1           | JQ704974.1; D4; Asia_E_America_N_S; 31; A73G; A263G; C309CCT                  | 16570 | Asia_E_America_N_S | D4           | D           | D            | 31             |
| 3173 | JQ704975.1           | JQ704975.1; W1g; Asia_W; 34; A73G; A189G; T195C                               | 16569 | Asia_W             | W1g          | W           | W            | 34             |
| 3174 | JQ704976.1           | JQ704976.1; I4b; Asia_W_SW; 40; A73G; T199C; T204C                            | 16573 | Asia_W_SW          | I4b          | I           | I            | 40             |
| 3175 | JQ704977.1           | JQ704977.1; X1c; Asia_W_America_N; 32; A73G; T146C; A153G                     | 16567 | Asia_W_America_N   | X1c          | X           | X            | 32             |
| 3176 | JQ704978.1           | JQ704978.1; L2c; Africa_W_C; 59; A73G; T146C; C150T                           | 16567 | Africa_W_C         | L2c          | L2          | L2           | 59             |
| 3177 | JQ704979.1           | JQ704979.1; H3h3a; Asia_W_Europe; 14; A263G; C315CC; A750G                    | 16569 | Asia_W_Europe      | H3h3a        | H           | H            | 14             |
| 3178 | JQ704980.1           | JQ704980.1; H1+16189; Asia_W_Europe; 14; A263G; C315CC; A750G                 | 16569 | Asia_W_Europe      | H1+16189     | H           | H            | 14             |
| 3179 | JQ704981.1           | JQ704981.1; U3b2b; Africa_NE_Asia_W; 33; A73G; C150T; A263G                   | 16566 | Africa_NE_Asia_W   | U3b2b        | U           | U3           | 33             |
| 3180 | JQ704982.1           | JQ704982.1; L3e2a1a; Africa_E; 37; A73G; C150T; T195C                         | 16569 | Africa_E           | L3e2a1a      | L3          | L3           | 37             |
| 3181 | JQ704983.1           | JQ704983.1; K1a1b1b1; Asia_W; 38; A73G; A263G; C309CCT                        | 16570 | Asia_W             | K1a1b1b1     | K           | K            | 38             |
| 3182 | JQ704984.1           | JQ704984.1; U5b1+16189+@16192; Asia_W_Europe_C; 27; GGAGCA106-; T146C; C16563 | 16563 | Asia_W_Europe_C    | U5b1+16189+@ | U           | U5           | 27             |
| 3183 | JQ704985.1           | JQ704985.1; X2I; Asia_W_America_N; 30; A73G; T195C; G225A                     | 16571 | Asia_W_America_N   | X2I          | X           | X            | 30             |
| 3184 | JQ704986.1           | JQ704986.1; H3ah; Asia_W_Europe; 15; T152C; A263G; C309CCCT                   | 16568 | Asia_W_Europe      | H3ah         | H           | H            | 15             |
| 3185 | JQ704987.1           | JQ704987.1; H54; Asia_W_Europe; 12; C182T; A263G; C309CCCT                    | 16570 | Asia_W_Europe      | H54          | H           | H            | 12             |
| 3186 | JQ704988.1           | JQ704988.1; V23; Europe_S; 16; T72C; A263G; C309CCT                           | 16570 | Europe_S           | V23          | V           | V            | 16             |
| 3187 | JQ704989.1           | JQ704989.1; W1g; Asia_W; 33; A73G; A189G; T195C                               | 16569 | Asia_W             | W1g          | W           | W            | 33             |
| 3188 | JQ704990.1           | JQ704990.1; U5a1a2a; Asia_W_Europe_C; 31; A73G; A263G; C309CCT                | 16572 | Asia_W_Europe_C    | U5a1a2a      | U           | U5           | 31             |
| 3189 | JQ704991.1           | JQ704991.1; U5a1a2b1; Asia_W_Europe_C; 34; A73G; A263G; C309CCT               | 16570 | Asia_W_Europe_C    | U5a1a2b1     | U           | U5           | 34             |
| 3190 | JQ704992.1           | JQ704992.1; T2b; Asia_W; 35; A73G; A263G; C309CCCT                            | 16570 | Asia_W             | T2b          | T           | T            | 35             |
| 3191 | JQ704993.1           | JQ704993.1; U4c1; Asia_N_Europe_N; 37; A73G; T195C; A263G                     | 16569 | Asia_N_Europe_N    | U4c1         | U           | U4           | 37             |
| 3192 | JQ704994.1           | JQ704994.1; H1ac; Asia_W_Europe; 13; A263G; C309CCCT; T310C                   | 16571 | Asia_W_Europe      | H1ac         | H           | H            | 13             |
| 3193 | JQ704995.1           | JQ704995.1; T2n; Asia_W; 33; A73G; T152C; A263G                               | 16570 | Asia_W             | T2n          | T           | T            | 33             |
| 3194 | JQ704996.1           | JQ704996.1; W3a1; Asia_W; 37; A73G; A189G; C194T                              | 16570 | Asia_W             | W3a1         | W           | W            | 37             |
| 3195 | JQ704997.1           | JQ704997.1; T2b7a2; Asia_W; 39; A73G; A263G; C309CCCT                         | 16570 | Asia_W             | T2b7a2       | T           | T            | 39             |
| 3196 | JQ704998.1           | JQ704998.1; V; Europe_S; 15; T72C; A263G; C309CCT                             | 16570 | Europe_S           | V            | V           | V            | 15             |
| 3197 | JQ704999.1           | JQ704999.1; U2e1a1b; Asia_S_W_Europe; 42; A73G; A108G; T152C                  | 16573 | Asia_S_W_Europe    | U2e1a1b      | U           | U2           | 42             |
| 3198 | JQ705000.1           | JQ705000.1; I2; Asia_W_SW; 36; A73G; T152C; T199C                             | 16571 | Asia_W_SW          | I2           | I           | I            | 36             |

**Supplementary Table S3** Human mitochondrial database (hMITO DB v1.0) metadata

| Row  | Name (accession no.) | Description                                                    | Size  | Geo_Region       | Haplogroup  | Macro_Haplo | Macro_Haplo2 | Total Variants |
|------|----------------------|----------------------------------------------------------------|-------|------------------|-------------|-------------|--------------|----------------|
| 3199 | JQ705001.1           | JQ705001.1; L2a1c5; Africa_W_C; 55; A73G; G143A; T146C         | 16569 | Africa_W_C       | L2a1c5      | L2          | L2           | 55             |
| 3200 | JQ705002.1           | JQ705002.1; N1a1a1a2; Africa_NE_Asia_W; 44; A73G; T152C; T199C | 16571 | Africa_NE_Asia_W | N1a1a1a2    | N           | N1           | 44             |
| 3201 | JQ705003.1           | JQ705003.1; H3b1b1a; Asia_W_Europe; 18; A153G; A263G; C309CCCT | 16571 | Asia_W_Europe    | H3b1b1a     | H           | H            | 18             |
| 3202 | JQ705004.1           | JQ705004.1; HV1b2; Asia_W; 21; T152C; A263G; C309CCCT          | 16570 | Asia_W           | HV1b2       | HV          | HV           | 21             |
| 3203 | JQ705005.1           | JQ705005.1; H46a; Asia_W_Europe; 13; T152C; A263G; C315CC      | 16567 | Asia_W_Europe    | H46a        | H           | H            | 13             |
| 3204 | JQ705006.1           | JQ705006.1; J1c2a3; Asia_W; 35; A73G; G185A; A188G             | 16570 | Asia_W           | J1c2a3      | J           | J            | 35             |
| 3205 | JQ705007.1           | JQ705007.1; U5b2a1b; Asia_W_Europe_C; 30; A73G; C150T; T152C   | 16569 | Asia_W_Europe_C  | U5b2a1b     | U           | U5           | 30             |
| 3206 | JQ705008.1           | JQ705008.1; HV0+195; Asia_W; 16; T72C; T195C; A263G            | 16571 | Asia_W           | HV0+195     | HV          | HV           | 16             |
| 3207 | JQ705009.1           | JQ705009.1; T2b11; Asia_W; 38; A73G; G207A; A263G              | 16571 | Asia_W           | T2b11       | T           | T            | 38             |
| 3208 | JQ705010.1           | JQ705010.1; K1c1; Asia_W; 35; A73G; T146C; T152C               | 16568 | Asia_W           | K1c1        | K           | K            | 35             |
| 3209 | JQ705011.1           | JQ705011.1; H1b1; Asia_W_Europe; 13; A263G; C315CC; CA522d     | 16567 | Asia_W_Europe    | H1b1        | H           | H            | 13             |
| 3210 | JQ705012.1           | JQ705012.1; L3e2b; Africa_E; 35; A73G; C150T; T195C            | 16570 | Africa_E         | L3e2b       | L3          | L3           | 35             |
| 3211 | JQ705013.1           | JQ705013.1; H1; Asia_W_Europe; 11; A263G; C315CC; A750G        | 16569 | Asia_W_Europe    | H1          | H           | H            | 11             |
| 3212 | JQ705014.1           | JQ705014.1; U3a1; Africa_NE_Asia_W; 34; A73G; C150T; A263G     | 16570 | Africa_NE_Asia_W | U3a1        | U           | U3           | 34             |
| 3213 | JQ705015.1           | JQ705015.1; T2f1a1; Asia_W; 40; A73G; T195C; A263G             | 16560 | Asia_W           | T2f1a1      | T           | T            | 40             |
| 3214 | JQ705016.1           | JQ705016.1; K1a1b1a; Asia_W; 37; A73G; C114T; A263G            | 16569 | Asia_W           | K1a1b1a     | K           | K            | 37             |
| 3215 | JQ705017.1           | JQ705017.1; K1a9; Asia_W; 32; A73G; T195C; A263G               | 16569 | Asia_W           | K1a9        | K           | K            | 32             |
| 3216 | JQ705018.1           | JQ705018.1; T2h1; Asia_W; 36; A73G; A263G; C309CCT             | 16570 | Asia_W           | T2h1        | T           | T            | 36             |
| 3217 | JQ705019.1           | JQ705019.1; L3d2b; Africa_E; 41; A73G; T152C; T199C            | 16568 | Africa_E         | L3d2b       | L3          | L3           | 41             |
| 3218 | JQ705020.1           | JQ705020.1; H3y; Asia_W_Europe; 14; A263G; C309CCCT; T310C     | 16571 | Asia_W_Europe    | H3y         | H           | H            | 14             |
| 3219 | JQ705021.1           | JQ705021.1; J2b1a+16311; Asia_W; 33; A73G; C150T; T152C        | 16569 | Asia_W           | J2b1a+16311 | J           | J            | 33             |
| 3220 | JQ705022.1           | JQ705022.1; H9a; Asia_W_Europe; 15; T152C; A263G; C309CCT      | 16570 | Asia_W_Europe    | H9a         | H           | H            | 15             |
| 3221 | JQ705023.1           | JQ705023.1; T2f1a1; Asia_W; 44; A73G; T195C; A263G             | 16558 | Asia_W           | T2f1a1      | T           | T            | 44             |
| 3222 | JQ705024.1           | JQ705024.1; H1e1; Asia_W_Europe; 17; T146C; A263G; C309CCCT    | 16568 | Asia_W_Europe    | H1e1        | H           | H            | 17             |
| 3223 | JQ705025.1           | JQ705025.1; I1a1; Asia_W_SW; 44; A73G; T199C; A202G            | 16573 | Asia_W_SW        | I1a1        | I           | I            | 44             |
| 3224 | JQ705026.1           | JQ705026.1; K1a9; Asia_W; 32; A73G; T195C; A263G               | 16569 | Asia_W           | K1a9        | K           | K            | 32             |
| 3225 | JQ705027.1           | JQ705027.1; H1c+152; Asia_W_Europe; 13; T152C; A263G; C309CCCT | 16568 | Asia_W_Europe    | H1c+152     | H           | H            | 13             |
| 3226 | JQ705028.1           | JQ705028.1; H1+16311; Asia_W_Europe; 10; A263G; C315CC; A750G  | 16569 | Asia_W_Europe    | H1+16311    | H           | H            | 10             |
| 3227 | JQ705029.1           | JQ705029.1; K2a8; Asia_W; 35; A73G; T146C; T152C               | 16569 | Asia_W           | K2a8        | K           | K            | 35             |
| 3228 | JQ705030.1           | JQ705030.1; X2c1; Asia_W_America_N; 33; A73G; A153G; T195C     | 16569 | Asia_W_America_N | X2c1        | X           | X            | 33             |
| 3229 | JQ705031.1           | JQ705031.1; J1c5; Asia_W; 29; A73G; G185A; G228A               | 16569 | Asia_W           | J1c5        | J           | J            | 29             |
| 3230 | JQ705032.1           | JQ705032.1; H10b; Asia_W_Europe; 12; A263G; C309CCCT; T310C    | 16570 | Asia_W_Europe    | H10b        | H           | H            | 12             |
| 3231 | JQ705033.1           | JQ705033.1; H27; Asia_W_Europe; 12; A263G; C315CC; A750G       | 16569 | Asia_W_Europe    | H27         | H           | H            | 12             |
| 3232 | JQ705034.1           | JQ705034.1; X2b5; Asia_W_America_N; 33; A73G; A153G; T195C     | 16569 | Asia_W_America_N | X2b5        | X           | X            | 33             |
| 3233 | JQ705035.1           | JQ705035.1; H5a1d; Asia_W_Europe; 13; A263G; C315CC; C456T     | 16567 | Asia_W_Europe    | H5a1d       | H           | H            | 13             |
| 3234 | JQ705036.1           | JQ705036.1; W1+119; Asia_W; 37; A73G; T119C; A189G             | 16570 | Asia_W           | W1+119      | W           | W            | 37             |
| 3235 | JQ705037.1           | JQ705037.1; T2b3d; Asia_W; 38; A73G; C151T; T199C              | 16570 | Asia_W           | T2b3d       | T           | T            | 38             |
| 3236 | JQ705038.1           | JQ705038.1; T2b24; Asia_W; 36; A73G; T146C; A263G              | 16570 | Asia_W           | T2b24       | T           | T            | 36             |
| 3237 | JQ705039.1           | JQ705039.1; H1i2a; Asia_W_Europe; 13; T152C; A263G; C315CC     | 16569 | Asia_W_Europe    | H1i2a       | H           | H            | 13             |
| 3238 | JQ705040.1           | JQ705040.1; H87; Asia_W_Europe; 11; C150T; A263G; C309CCCT     | 16571 | Asia_W_Europe    | H87         | H           | H            | 11             |
| 3239 | JQ705041.1           | JQ705041.1; H3h5; Asia_W_Europe; 12; A263G; C315CC; A750G      | 16569 | Asia_W_Europe    | H3h5        | H           | H            | 12             |

**Supplementary Table S3** Human mitochondrial database (hMITO DB v1.0) metadata

| Row  | Name (accession no.) | Description                                                    | Size  | Geo_Region        | Haplogroup | Macro_Haplo | Macro_Haplo2 | Total Variants |
|------|----------------------|----------------------------------------------------------------|-------|-------------------|------------|-------------|--------------|----------------|
| 3240 | JQ705042.1           | JQ705042.1; J2a1a1b; Asia_W; 42; A73G; C150T; T152C            | 16571 | Asia_W            | J2a1a1b    | J           | J            | 42             |
| 3241 | JQ705043.1           | JQ705043.1; U3b1b; Africa_NE_Asia_W; 29; A73G; C150T; A263G    | 16570 | Africa_NE_Asia_W  | U3b1b      | U           | U3           | 29             |
| 3242 | JQ705044.1           | JQ705044.1; K1b2a2; Asia_W; 35; A73G; T146C; T195C             | 16571 | Asia_W            | K1b2a2     | K           | K            | 35             |
| 3243 | JQ705045.1           | JQ705045.1; H7d5; Asia_W_Europe; 16; A263G; C309CCT; T310C     | 16570 | Asia_W_Europe     | H7d5       | H           | H            | 16             |
| 3244 | JQ705046.1           | JQ705046.1; L2a1c1a1; Africa_W_C; 61; A73G; G143A; T146C       | 16569 | Africa_W_C        | L2a1c1a1   | L2          | L2           | 61             |
| 3245 | JQ705047.1           | JQ705047.1; T2b6b; Asia_W; 43; A73G; T146C; A263G              | 16570 | Asia_W            | T2b6b      | T           | T            | 43             |
| 3246 | JQ705048.1           | JQ705048.1; H1a1; Asia_W_Europe; 14; A73G; A263G; C315CC       | 16569 | Asia_W_Europe     | H1a1       | H           | H            | 14             |
| 3247 | JQ705049.1           | JQ705049.1; L2a1l2a; Africa_W_C; 55; A73G; T146C; T152C        | 16570 | Africa_W_C        | L2a1l2a    | L2          | L2           | 55             |
| 3248 | JQ705050.1           | JQ705050.1; H1e2a; Asia_W_Europe; 13; A263G; C315CC; A750G     | 16569 | Asia_W_Europe     | H1e2a      | H           | H            | 13             |
| 3249 | JQ705051.1           | JQ705051.1; J1c1; Asia_W; 35; A73G; G228A; A263G               | 16569 | Asia_W            | J1c1       | J           | J            | 35             |
| 3250 | JQ705052.1           | JQ705052.1; H1as2; Asia_W_Europe; 11; A263G; C315CC; A750G     | 16569 | Asia_W_Europe     | H1as2      | H           | H            | 11             |
| 3251 | JQ705053.1           | JQ705053.1; H28a1; Asia_W_Europe; 15; C182T; C186A; A263G      | 16570 | Asia_W_Europe     | H28a1      | H           | H            | 15             |
| 3252 | JQ705054.1           | JQ705054.1; J1c2t; Asia_W; 32; A73G; T152C; G185A              | 16570 | Asia_W            | J1c2t      | J           | J            | 32             |
| 3253 | JQ705055.1           | JQ705055.1; L2a1a2a1a; Africa_W_C; 61; A73G; T146C; T152C      | 16570 | Africa_W_C        | L2a1a2a1a  | L2          | L2           | 61             |
| 3254 | JQ705056.1           | JQ705056.1; W1+119; Asia_W; 35; A73G; T119C; A189G             | 16569 | Asia_W            | W1+119     | W           | W            | 35             |
| 3255 | JQ705057.1           | JQ705057.1; T2a1a; Asia_W; 34; A73G; A263G; C315CC             | 16569 | Asia_W            | T2a1a      | T           | T            | 34             |
| 3256 | JQ705058.1           | JQ705058.1; T1a; Asia_W; 37; A73G; T239C; A263G                | 16570 | Asia_W            | T1a        | T           | T            | 37             |
| 3257 | JQ705059.1           | JQ705059.1; K2a6; Asia_W; 34; A73G; T146C; T152C               | 16570 | Asia_W            | K2a6       | K           | K            | 34             |
| 3258 | JQ705060.1           | JQ705060.1; I4a1; Asia_W_SW; 37; A73G; T199C; T250C            | 16571 | Asia_W_SW         | I4a1       | I           | I            | 37             |
| 3259 | JQ705061.1           | JQ705061.1; R1a1a2; Asia_S_SE; 37; A73G; A263G; C295A          | 16570 | Asia_S_SE         | R1a1a2     | R           | R1           | 37             |
| 3260 | JQ705062.1           | JQ705062.1; H+152; Asia_W_Europe; 14; C151T; T152C; A263G      | 16570 | Asia_W_Europe     | H+152      | H           | H            | 14             |
| 3261 | JQ705063.1           | JQ705063.1; K1e1; Asia_W; 41; A73G; C151T; T152C               | 16572 | Asia_W            | K1e1       | K           | K            | 41             |
| 3262 | JQ705064.1           | JQ705064.1; J2b1; Asia_W; 32; A73G; C150T; T152C               | 16569 | Asia_W            | J2b1       | J           | J            | 32             |
| 3263 | JQ705065.1           | JQ705065.1; U5a1a1; Asia_W_Europe_C; 29; A73G; A263G; C309CCT  | 16570 | Asia_W_Europe_C   | U5a1a1     | U           | U5           | 29             |
| 3264 | JQ705066.1           | JQ705066.1; H3b+16129; Asia_W_Europe; 12; A263G; C315CC; A750G | 16569 | Asia_W_Europe     | H3b+16129  | H           | H            | 12             |
| 3265 | JQ705067.1           | JQ705067.1; X2i1; Asia_W_America_N; 30; A73G; A153G; T195C     | 16570 | Asia_W_America_N  | X2i1       | X           | X            | 30             |
| 3266 | JQ705068.1           | JQ705068.1; U2e1g; Asia_S_W_Europe; 39; A73G; T152C; T217C     | 16570 | Asia_S_W_Europe   | U2e1g      | U           | U2           | 39             |
| 3267 | JQ705069.1           | JQ705069.1; A2z; Asia_NE_America_N; 37; A73G; T146C; T152C     | 16569 | Asia_NE_America_N | A2z        | A           | A            | 37             |
| 3268 | JQ705070.1           | JQ705070.1; U5b2b3a1a; Asia_W_Europe_C; 38; A73G; C150T; A263G | 16569 | Asia_W_Europe_C   | U5b2b3a1a  | U           | U5           | 38             |
| 3269 | JQ705071.1           | JQ705071.1; H4a1a1a; Asia_W_Europe; 18; A73G; T146C; A263G     | 16569 | Asia_W_Europe     | H4a1a1a    | H           | H            | 18             |
| 3270 | JQ705072.1           | JQ705072.1; J1c7a; Asia_W; 35; A73G; G185A; T195C              | 16570 | Asia_W            | J1c7a      | J           | J            | 35             |
| 3271 | JQ705073.1           | JQ705073.1; K2a6; Asia_W; 33; A73G; T146C; T152C               | 16569 | Asia_W            | K2a6       | K           | K            | 33             |
| 3272 | JQ705074.1           | JQ705074.1; H27e; Asia_W_Europe; 14; A263G; C315CC; A750G      | 16560 | Asia_W_Europe     | H27e       | H           | H            | 14             |
| 3273 | JQ705075.1           | JQ705075.1; N1a1a1a2; Africa_NE_Asia_W; 38; A73G; T152C; T199C | 16571 | Africa_NE_Asia_W  | N1a1a1a2   | N           | N1           | 38             |
| 3274 | JQ705076.1           | JQ705076.1; H27e; Asia_W_Europe; 14; T152C; A263G; C315CC      | 16560 | Asia_W_Europe     | H27e       | H           | H            | 14             |
| 3275 | JQ705077.1           | JQ705077.1; L3d1b2; Africa_E; 38; A73G; C150T; T152C           | 16567 | Africa_E          | L3d1b2     | L3          | L3           | 38             |
| 3276 | JQ705078.1           | JQ705078.1; H1ap1; Asia_W_Europe; 15; T152C; A263G; C315CC     | 16569 | Asia_W_Europe     | H1ap1      | H           | H            | 15             |
| 3277 | JQ705079.1           | JQ705079.1; T2g1a1; Asia_W; 41; A73G; T152C; A200G             | 16570 | Asia_W            | T2g1a1     | T           | T            | 41             |
| 3278 | JQ705080.1           | JQ705080.1; H3g3; Asia_W_Europe; 15; T152C; A263G; C309CCT     | 16570 | Asia_W_Europe     | H3g3       | H           | H            | 15             |
| 3279 | JQ705081.1           | JQ705081.1; H3+16311; Asia_W_Europe; 12; T152C; A263G; C315CC  | 16569 | Asia_W_Europe     | H3+16311   | H           | H            | 12             |
| 3280 | JQ705082.1           | JQ705082.1; X2b7; Asia_W_America_N; 36; A73G; T146C; A153G     | 16570 | Asia_W_America_N  | X2b7       | X           | X            | 36             |



**Supplementary Table S3** Human mitochondrial database (hMITO DB v1.0) metadata

| Row  | Name (accession no.) | Description                                                      | Size  | Geo_Region       | Haplogroup | Macro_Haplo | Macro_Haplo2 | Total Variants |
|------|----------------------|------------------------------------------------------------------|-------|------------------|------------|-------------|--------------|----------------|
| 3281 | JQ705083.1           | JQ705083.1; J1c16; Asia_W; 32; A73G; T152C; G185A                | 16569 | Asia_W           | J1c16      | J           | J            | 32             |
| 3282 | JQ705084.1           | JQ705084.1; H14a+146; Asia_W_Europe; 15; T146C; A263G; C309CCT   | 16570 | Asia_W_Europe    | H14a+146   | H           | H            | 15             |
| 3283 | JQ705085.1           | JQ705085.1; J1c3b; Asia_W; 30; A73G; G185A; A263G                | 16570 | Asia_W           | J1c3b      | J           | J            | 30             |
| 3284 | JQ705086.1           | JQ705086.1; V; Europe_S; 15; T72C; A263G; C309CCCT               | 16571 | Europe_S         | V          | V           | V            | 15             |
| 3285 | JQ705087.1           | JQ705087.1; L2a1a; Africa_W_C; 55; A73G; T146C; T195C            | 16571 | Africa_W_C       | L2a1a      | L2          | L2           | 55             |
| 3286 | JQ705088.1           | JQ705088.1; H6a1a; Asia_W_Europe; 14; T239C; A263G; C315CC       | 16569 | Asia_W_Europe    | H6a1a      | H           | H            | 14             |
| 3287 | JQ705089.1           | JQ705089.1; H16b; Asia_W_Europe; 14; A263G; C315CC; A750G        | 16569 | Asia_W_Europe    | H16b       | H           | H            | 14             |
| 3288 | JQ705090.1           | JQ705090.1; K2a2a1; Asia_W; 36; A73G; T146C; T152C               | 16569 | Asia_W           | K2a2a1     | K           | K            | 36             |
| 3289 | JQ705091.1           | JQ705091.1; H3aa; Asia_W_Europe; 15; C242T; A263G; C315CC        | 16569 | Asia_W_Europe    | H3aa       | H           | H            | 15             |
| 3290 | JQ705092.1           | JQ705092.1; K2b1a1; Asia_W; 34; A73G; T146C; A263G               | 16569 | Asia_W           | K2b1a1     | K           | K            | 34             |
| 3291 | JQ705093.1           | JQ705093.1; J1b1a1; Asia_W; 37; A73G; C242T; A263G               | 16569 | Asia_W           | J1b1a1     | J           | J            | 37             |
| 3292 | JQ705094.1           | JQ705094.1; J1c7a; Asia_W; 36; A73G; T146C; T152C                | 16569 | Asia_W           | J1c7a      | J           | J            | 36             |
| 3293 | JQ705095.1           | JQ705095.1; U5b1c1a1; Asia_W_Europe_C; 33; T55A; A73G; C150T     | 16570 | Asia_W_Europe_C  | U5b1c1a1   | U           | U5           | 33             |
| 3294 | JQ705096.1           | JQ705096.1; I5a1a; Asia_W_SW; 36; A73G; T199C; T204C             | 16562 | Asia_W_SW        | I5a1a      | I           | I            | 36             |
| 3295 | JQ705097.1           | JQ705097.1; T2g1a1; Asia_W; 40; A73G; A200G; A263G               | 16569 | Asia_W           | T2g1a1     | T           | T            | 40             |
| 3296 | JQ705098.1           | JQ705098.1; H13a1a; Asia_W_Europe; 15; A200G; A263G; C309CCCT    | 16571 | Asia_W_Europe    | H13a1a     | H           | H            | 15             |
| 3297 | JQ705099.1           | JQ705099.1; V7a; Europe_S; 21; T72C; A93G; T195C                 | 16570 | Europe_S         | V7a        | V           | V            | 21             |
| 3298 | JQ705100.1           | JQ705100.1; K1a4a; Asia_W; 36; A73G; C150T; A263G                | 16569 | Asia_W           | K1a4a      | K           | K            | 36             |
| 3299 | JQ705101.1           | JQ705101.1; U5a1b3a1; Asia_W_Europe_C; 29; A73G; A249G; A263G    | 16569 | Asia_W_Europe_C  | U5a1b3a1   | U           | U5           | 29             |
| 3300 | JQ705102.1           | JQ705102.1; H1ae2; Asia_W_Europe; 14; A263G; C315CC; A750G       | 16569 | Asia_W_Europe    | H1ae2      | H           | H            | 14             |
| 3301 | JQ705103.1           | JQ705103.1; K1b2a1a1; Asia_W; 38; A73G; T146C; T195C             | 16573 | Asia_W           | K1b2a1a1   | K           | K            | 38             |
| 3302 | JQ705104.1           | JQ705104.1; R1a1a2; Asia_S_SE; 40; A73G; A263G; C295A            | 16572 | Asia_S_SE        | R1a1a2     | R           | R1           | 40             |
| 3303 | JQ705105.1           | JQ705105.1; U5b1b2; Asia_W_Europe_C; 30; A73G; C150T; T217C      | 16571 | Asia_W_Europe_C  | U5b1b2     | U           | U5           | 30             |
| 3304 | JQ705106.1           | JQ705106.1; T2b17a; Asia_W; 37; A73G; A263G; C315CC              | 16569 | Asia_W           | T2b17a     | T           | T            | 37             |
| 3305 | JQ705107.1           | JQ705107.1; H1bb; Asia_W_Europe; 13; T152C; A263G; C315CC        | 16573 | Asia_W_Europe    | H1bb       | H           | H            | 13             |
| 3306 | JQ705108.1           | JQ705108.1; W6b; Asia_W; 42; A73G; A189G; T195C                  | 16571 | Asia_W           | W6b        | W           | W            | 42             |
| 3307 | JQ705109.1           | JQ705109.1; L0a2a2a; Africa_S_SE; 93; C64T; A93G; C150T          | 16558 | Africa_S_SE      | L0a2a2a    | L0          | L0           | 93             |
| 3308 | JQ705110.1           | JQ705110.1; H3k1a; Asia_W_Europe; 14; T152C; A263G; C315CC       | 16569 | Asia_W_Europe    | H3k1a      | H           | H            | 14             |
| 3309 | JQ705111.1           | JQ705111.1; U5a2+16362; Asia_W_Europe_C; 28; A73G; A263G; C315CC | 16569 | Asia_W_Europe_C  | U5a2+16362 | U           | U5           | 28             |
| 3310 | JQ705112.1           | JQ705112.1; H4c1; Asia_W_Europe; 15; A73G; A263G; C315CC         | 16567 | Asia_W_Europe    | H4c1       | H           | H            | 15             |
| 3311 | JQ705113.1           | JQ705113.1; H3ap; Asia_W_Europe; 13; A263G; C315CC; A750G        | 16569 | Asia_W_Europe    | H3ap       | H           | H            | 13             |
| 3312 | JQ705114.1           | JQ705114.1; J1c1a; Asia_W; 34; A73G; G228A; A263G                | 16569 | Asia_W           | J1c1a      | J           | J            | 34             |
| 3313 | JQ705115.1           | JQ705115.1; L1b1a4; Africa_C; 82; A73G; T152C; C182T             | 16567 | Africa_C         | L1b1a4     | L1          | L1           | 82             |
| 3314 | JQ705116.1           | JQ705116.1; H3y; Asia_W_Europe; 14; A263G; C309CCT; T310C        | 16570 | Asia_W_Europe    | H3y        | H           | H            | 14             |
| 3315 | JQ705117.1           | JQ705117.1; U2e1a1a; Asia_S_W_Europe; 42; A73G; T152C; A263G     | 16572 | Asia_S_W_Europe  | U2e1a1a    | U           | U2           | 42             |
| 3316 | JQ705118.1           | JQ705118.1; X2e1a1; Asia_W_America_N; 32; A73G; A153G; T195C     | 16570 | Asia_W_America_N | X2e1a1     | X           | X            | 32             |
| 3317 | JQ705119.1           | JQ705119.1; T2b2b1; Asia_W; 35; A73G; A263G; C315CC              | 16569 | Asia_W           | T2b2b1     | T           | T            | 35             |
| 3318 | JQ705120.1           | JQ705120.1; L2c; Africa_W_C; 63; A73G; A93G; T146C               | 16569 | Africa_W_C       | L2c        | L2          | L2           | 63             |
| 3319 | JQ705121.1           | JQ705121.1; U4a2b; Asia_N_Europe_N; 31; A73G; A189G; T195C       | 16570 | Asia_N_Europe_N  | U4a2b      | U           | U4           | 31             |
| 3320 | JQ705122.1           | JQ705122.1; K1c2a; Asia_W; 37; A73G; T146C; T152C                | 16568 | Asia_W           | K1c2a      | K           | K            | 37             |
| 3321 | JQ705123.1           | JQ705123.1; U5a2d1a; Asia_W_Europe_C; 32; A73G; A263G; C315CC    | 16567 | Asia_W_Europe_C  | U5a2d1a    | U           | U5           | 32             |

**Supplementary Table S3** Human mitochondrial database (hMITO DB v1.0) metadata

| Row  | Name (accession no.) | Description                                                     | Size  | Geo_Region            | Haplogroup | Macro_Haplo | Macro_Haplo2 | Total Variants |
|------|----------------------|-----------------------------------------------------------------|-------|-----------------------|------------|-------------|--------------|----------------|
| 3322 | JQ705124.1           | JQ705124.1; H3ag1; Asia_W_Europe; 12; A263G; C315CC; A750G      | 16569 | Asia_W_Europe         | H3ag1      | H           | H            | 12             |
| 3323 | JQ705125.1           | JQ705125.1; H1a6; Asia_W_Europe; 14; A73G; C151T; A263G         | 16569 | Asia_W_Europe         | H1a6       | H           | H            | 14             |
| 3324 | JQ705126.1           | JQ705126.1; H1b1d; Asia_W_Europe; 15; A93G; A263G; C315CC       | 16567 | Asia_W_Europe         | H1b1d      | H           | H            | 15             |
| 3325 | JQ705127.1           | JQ705127.1; HV0f; Asia_W; 13; T195C; A263G; C315CC              | 16569 | Asia_W                | HV0f       | HV          | HV           | 13             |
| 3326 | JQ705128.1           | JQ705128.1; H45a; Asia_W_Europe; 12; T199C; A263G; C315CC       | 16569 | Asia_W_Europe         | H45a       | H           | H            | 12             |
| 3327 | JQ705129.1           | JQ705129.1; J1c2f; Asia_W; 31; A73G; G185A; A188G               | 16569 | Asia_W                | J1c2f      | J           | J            | 31             |
| 3328 | JQ705130.1           | JQ705130.1; U4b; Asia_N_Europe_N; 32; A73G; T195C; T196C        | 16569 | Asia_N_Europe_N       | U4b        | U           | U4           | 32             |
| 3329 | JQ705131.1           | JQ705131.1; K1c1; Asia_W; 35; A73G; T146C; T152C                | 16568 | Asia_W                | K1c1       | K           | K            | 35             |
| 3330 | JQ705132.1           | JQ705132.1; U5a1a1; Asia_W_Europe_C; 30; A73G; A263G; C309CCT   | 16570 | Asia_W_Europe_C       | U5a1a1     | U           | U5           | 30             |
| 3331 | JQ705133.1           | JQ705133.1; T2a1a; Asia_W; 36; A73G; A263G; C309CCT             | 16570 | Asia_W                | T2a1a      | T           | T            | 36             |
| 3332 | JQ705134.1           | JQ705134.1; H29; Asia_W_Europe; 17; A93G; A263G; C315CC         | 16571 | Asia_W_Europe         | H29        | H           | H            | 17             |
| 3333 | JQ705135.1           | JQ705135.1; H1bb; Asia_W_Europe; 13; T152C; A263G; C315CC       | 16571 | Asia_W_Europe         | H1bb       | H           | H            | 13             |
| 3334 | JQ705136.1           | JQ705136.1; L3e2a1b1; Africa_E; 38; A73G; T146C; C150T          | 16567 | Africa_E              | L3e2a1b1   | L3          | L3           | 38             |
| 3335 | JQ705137.1           | JQ705137.1; L3h1b1a; Africa_E; 47; A73G; A189C; T195C           | 16567 | Africa_E              | L3h1b1a    | L3          | L3           | 47             |
| 3336 | JQ705138.1           | JQ705138.1; H1bn; Asia_W_Europe; 12; A263G; C315CC; A750G       | 16569 | Asia_W_Europe         | H1bn       | H           | H            | 12             |
| 3337 | JQ705139.1           | JQ705139.1; H2a2a1d; Asia_W_Europe; 4; C309CCT; T310C; A14357G  | 16570 | Asia_W_Europe         | H2a2a1d    | H           | H            | 4              |
| 3338 | JQ705140.1           | JQ705140.1; I1a1a; Asia_W_SW; 44; A73G; T199C; G203A            | 16572 | Asia_W_SW             | I1a1a      | I           | I            | 44             |
| 3339 | JQ705141.1           | JQ705141.1; J1c1b2; Asia_W; 32; A73G; G228A; A263G              | 16567 | Asia_W                | J1c1b2     | J           | J            | 32             |
| 3340 | JQ705142.1           | JQ705142.1; V3c; Europe_S; 16; T72C; A263G; C309CCT             | 16570 | Europe_S              | V3c        | V           | V            | 16             |
| 3341 | JQ705143.1           | JQ705143.1; H47a; Asia_W_Europe; 13; T152C; A263G; C309CCCT     | 16571 | Asia_W_Europe         | H47a       | H           | H            | 13             |
| 3342 | JQ705144.1           | JQ705144.1; H45b; Asia_W_Europe; 15; A263G; C309CCT; T310C      | 16570 | Asia_W_Europe         | H45b       | H           | H            | 15             |
| 3343 | JQ705145.1           | JQ705145.1; L2a1c3a1; Africa_W_C; 60; A73G; G143A; T146C        | 16569 | Africa_W_C            | L2a1c3a1   | L2          | L2           | 60             |
| 3344 | JQ705146.1           | JQ705146.1; H17b; Asia_W_Europe; 15; T146C; A263G; C315CC       | 16569 | Asia_W_Europe         | H17b       | H           | H            | 15             |
| 3345 | JQ705147.1           | JQ705147.1; B2o; Asia_SE_E_America_N_S; 33; A73G; A263G; T310C  | 16559 | Asia_SE_E_America_N_S | B2o        | B           | B            | 33             |
| 3346 | JQ705148.1           | JQ705148.1; T2e; Asia_W; 34; A73G; C150T; A263G                 | 16570 | Asia_W                | T2e        | T           | T            | 34             |
| 3347 | JQ705149.1           | JQ705149.1; K1a2c; Asia_W; 41; G54T; A73G; T146C                | 16573 | Asia_W                | K1a2c      | K           | K            | 41             |
| 3348 | JQ705150.1           | JQ705150.1; L2a1f; Africa_W_C; 54; A73G; T146C; T152C           | 16570 | Africa_W_C            | L2a1f      | L2          | L2           | 54             |
| 3349 | JQ705151.1           | JQ705151.1; H39a; Asia_W_Europe; 12; A263G; C309CCCT; T310C     | 16571 | Asia_W_Europe         | H39a       | H           | H            | 12             |
| 3350 | JQ705152.1           | JQ705152.1; U4a2d; Asia_N_Europe_N; 30; A73G; T195C; A263G      | 16570 | Asia_N_Europe_N       | U4a2d      | U           | U4           | 30             |
| 3351 | JQ705153.1           | JQ705153.1; C1b12; Asia_NE_America_N_S; 41; A73G; A249d; A263G  | 16564 | Asia_NE_America_N_S   | C1b12      | C           | C            | 41             |
| 3352 | JQ705154.1           | JQ705154.1; X2b8; Asia_W_America_N; 33; A73G; A153G; G225A      | 16570 | Asia_W_America_N      | X2b8       | X           | X            | 33             |
| 3353 | JQ705155.1           | JQ705155.1; X2c2; Asia_W_America_N; 32; A73G; A153G; T195C      | 16572 | Asia_W_America_N      | X2c2       | X           | X            | 32             |
| 3354 | JQ705156.1           | JQ705156.1; K2a4; Asia_W; 34; A73G; T146C; T152C                | 16569 | Asia_W                | K2a4       | K           | K            | 34             |
| 3355 | JQ705157.1           | JQ705157.1; H1+16239; Asia_W_Europe; 12; A263G; C309CCCT; T310C | 16571 | Asia_W_Europe         | H1+16239   | H           | H            | 12             |
| 3356 | JQ705158.1           | JQ705158.1; U5b2a2a; Asia_W_Europe_C; 30; A73G; C150T; A263G    | 16569 | Asia_W_Europe_C       | U5b2a2a    | U           | U5           | 30             |
| 3357 | JQ705159.1           | JQ705159.1; H1c; Asia_W_Europe; 12; A263G; C315CC; T477C        | 16569 | Asia_W_Europe         | H1c        | H           | H            | 12             |
| 3358 | JQ705160.1           | JQ705160.1; H3; Asia_W_Europe; 14; A189G; A263G; C309CCCT       | 16571 | Asia_W_Europe         | H3         | H           | H            | 14             |
| 3359 | JQ705161.1           | JQ705161.1; C5c1a; Asia_NE_America_N_S; 45; A73G; T152C; A249d  | 16569 | Asia_NE_America_N_S   | C5c1a      | C           | C            | 45             |
| 3360 | JQ705162.1           | JQ705162.1; K1a4; Asia_W; 34; A73G; A263G; C315CC               | 16573 | Asia_W                | K1a4       | K           | K            | 34             |
| 3361 | JQ705163.1           | JQ705163.1; H+195; Asia_W_Europe; 13; G143A; T195C; A263G       | 16570 | Asia_W_Europe         | H+195      | H           | H            | 13             |
| 3362 | JQ705164.1           | JQ705164.1; J1c1b1a1; Asia_W; 36; A73G; G185A; T195C            | 16569 | Asia_W                | J1c1b1a1   | J           | J            | 36             |

**Supplementary Table S3** Human mitochondrial database (hMITO DB v1.0) metadata

| Row  | Name (accession no.) | Description                                                     | Size  | Geo_Region            | Haplogroup | Macro_Haplo | Macro_Haplo2 | Total Variants |
|------|----------------------|-----------------------------------------------------------------|-------|-----------------------|------------|-------------|--------------|----------------|
| 3363 | JQ705165.1           | JQ705165.1; H35; Asia_W_Europe; 12; A263G; C309CCT; T310C       | 16570 | Asia_W_Europe         | H35        | H           | H            | 12             |
| 3364 | JQ705166.1           | JQ705166.1; B2; Asia_SE_E_America_N_S; 29; A73G; T146C; A263G   | 16559 | Asia_SE_E_America_N_S | B2         | B           | B            | 29             |
| 3365 | JQ705167.1           | JQ705167.1; H1c1; Asia_W_Europe; 13; T195C; A263G; C315CC       | 16569 | Asia_W_Europe         | H1c1       | H           | H            | 13             |
| 3366 | JQ705168.1           | JQ705168.1; V20; Europe_S; 18; T72C; T152C; A263G               | 16570 | Europe_S              | V20        | V           | V            | 18             |
| 3367 | JQ705169.1           | JQ705169.1; H1a3a1; Asia_W_Europe; 16; A73G; A263G; C309CCT     | 16570 | Asia_W_Europe         | H1a3a1     | H           | H            | 16             |
| 3368 | JQ705170.1           | JQ705170.1; H1e2a; Asia_W_Europe; 14; A263G; C309CCT; T310C     | 16570 | Asia_W_Europe         | H1e2a      | H           | H            | 14             |
| 3369 | JQ705171.1           | JQ705171.1; H1ax; Asia_W_Europe; 15; A263G; C309CCT; T310C      | 16570 | Asia_W_Europe         | H1ax       | H           | H            | 15             |
| 3370 | JQ705172.1           | JQ705172.1; H96; Asia_W_Europe; 22; G185A; A189G; A263G         | 16567 | Asia_W_Europe         | H96        | H           | H            | 22             |
| 3371 | JQ705173.1           | JQ705173.1; K1c2; Asia_W; 38; A73G; T146C; T152C                | 16570 | Asia_W                | K1c2       | K           | K            | 38             |
| 3372 | JQ705174.1           | JQ705174.1; H17a; Asia_W_Europe; 12; A263G; C309CCT; T310C      | 16570 | Asia_W_Europe         | H17a       | H           | H            | 12             |
| 3373 | JQ705175.1           | JQ705175.1; I2a3; Asia_W_SW; 41; A73G; T152C; T199C             | 16572 | Asia_W_SW             | I2a3       | I           | I            | 41             |
| 3374 | JQ705176.1           | JQ705176.1; H51; Asia_W_Europe; 10; A263G; C309CCT; T310C       | 16570 | Asia_W_Europe         | H51        | H           | H            | 10             |
| 3375 | JQ705177.1           | JQ705177.1; H4a1a1a; Asia_W_Europe; 19; A73G; A263G; C309CCT    | 16568 | Asia_W_Europe         | H4a1a1a    | H           | H            | 19             |
| 3376 | JQ705178.1           | JQ705178.1; K1c2; Asia_W; 35; A73G; T146C; T152C                | 16568 | Asia_W                | K1c2       | K           | K            | 35             |
| 3377 | JQ705179.1           | JQ705179.1; X2b6; Asia_W_America_N; 36; A73G; A153G; T195C      | 16569 | Asia_W_America_N      | X2b6       | X           | X            | 36             |
| 3378 | JQ705180.1           | JQ705180.1; U5b2b4; Asia_W_Europe_C; 33; A73G; C150T; A263G     | 16572 | Asia_W_Europe_C       | U5b2b4     | U           | U5           | 33             |
| 3379 | JQ705181.1           | JQ705181.1; H3g1; Asia_W_Europe; 14; T152C; A263G; C309CCT      | 16570 | Asia_W_Europe         | H3g1       | H           | H            | 14             |
| 3380 | JQ705182.1           | JQ705182.1; H1c3b; Asia_W_Europe; 19; A257G; A263G; C309CCCT    | 16571 | Asia_W_Europe         | H1c3b      | H           | H            | 19             |
| 3381 | JQ705183.1           | JQ705183.1; U5b1h; Asia_W_Europe_C; 27; A73G; C150T; A263G      | 16569 | Asia_W_Europe_C       | U5b1h      | U           | U5           | 27             |
| 3382 | JQ705184.1           | JQ705184.1; U5b1b1a1a1; Asia_W_Europe_C; 32; A73G; C150T; A263G | 16569 | Asia_W_Europe_C       | U5b1b1a1a1 | U           | U5           | 32             |
| 3383 | JQ705185.1           | JQ705185.1; L2a1I2a; Africa_W_C; 55; A73G; T146C; T152C         | 16570 | Africa_W_C            | L2a1I2a    | L2          | L2           | 55             |
| 3384 | JQ705186.1           | JQ705186.1; N1b1a2; Africa_NE_Asia_W; 39; A73G; C151T; T152C    | 16567 | Africa_NE_Asia_W      | N1b1a2     | N           | N1           | 39             |
| 3385 | JQ705187.1           | JQ705187.1; I2c; Asia_W_SW; 37; A73G; T152C; T199C              | 16574 | Asia_W_SW             | I2c        | I           | I            | 37             |
| 3386 | JQ705188.1           | JQ705188.1; H6a1b3; Asia_W_Europe; 19; G203A; T204C; T239C      | 16570 | Asia_W_Europe         | H6a1b3     | H           | H            | 19             |
| 3387 | JQ705189.1           | JQ705189.1; I1a1d; Asia_W_SW; 46; A73G; T199C; G203A            | 16573 | Asia_W_SW             | I1a1d      | I           | I            | 46             |
| 3388 | JQ705190.1           | JQ705190.1; I1c1a; Asia_W_SW; 43; A73G; T199C; T204C            | 16573 | Asia_W_SW             | I1c1a      | I           | I            | 43             |
| 3389 | JQ705191.1           | JQ705191.1; I4a1; Asia_W_SW; 36; A73G; T199C; T204C             | 16571 | Asia_W_SW             | I4a1       | I           | I            | 36             |
| 3390 | JQ705192.1           | JQ705192.1; K1a3a3; Asia_W; 39; A73G; T146C; A263G              | 16570 | Asia_W                | K1a3a3     | K           | K            | 39             |
| 3391 | JQ705193.1           | JQ705193.1; H16b; Asia_W_Europe; 10; A263G; C315CC; A750G       | 16569 | Asia_W_Europe         | H16b       | H           | H            | 10             |
| 3392 | JQ705194.1           | JQ705194.1; H13a1a; Asia_W_Europe; 14; T146C; A263G; C309CCCT   | 16571 | Asia_W_Europe         | H13a1a     | H           | H            | 14             |
| 3393 | JQ705195.1           | JQ705195.1; H1c1; Asia_W_Europe; 13; T152C; A263G; C315CC       | 16569 | Asia_W_Europe         | H1c1       | H           | H            | 13             |
| 3394 | JQ705196.1           | JQ705196.1; R0a2m; Africa_NE_Asia_W; 23; T57TC; C64T; A263G     | 16572 | Africa_NE_Asia_W      | R0a2m      | R           | R0           | 23             |
| 3395 | JQ705197.1           | JQ705197.1; H3; Asia_W_Europe; 12; A263G; C309CCT; T310C        | 16570 | Asia_W_Europe         | H3         | H           | H            | 12             |
| 3396 | JQ705198.1           | JQ705198.1; U7b; Asia_W; 34; A73G; T152C; A263G                 | 16568 | Asia_W                | U7b        | U           | U7           | 34             |
| 3397 | JQ705199.1           | JQ705199.1; T2b3e; Asia_W; 38; A73G; C151T; A263G               | 16570 | Asia_W                | T2b3e      | T           | T            | 38             |
| 3398 | JQ705200.1           | JQ705200.1; X2c1; Asia_W_America_N; 32; A73G; A153G; T195C      | 16570 | Asia_W_America_N      | X2c1       | X           | X            | 32             |
| 3399 | JQ705201.1           | JQ705201.1; H2a1f1; Asia_W_Europe; 11; T127C; T152C; A263G      | 16571 | Asia_W_Europe         | H2a1f1     | H           | H            | 11             |
| 3400 | JQ705202.1           | JQ705202.1; H10e1; Asia_W_Europe; 13; A263G; C309CCT; T310C     | 16570 | Asia_W_Europe         | H10e1      | H           | H            | 13             |
| 3401 | JQ705203.1           | JQ705203.1; H55b; Asia_W_Europe; 13; A153G; T204C; A263G        | 16571 | Asia_W_Europe         | H55b       | H           | H            | 13             |
| 3402 | JQ705204.1           | JQ705204.1; K1a1b1a; Asia_W; 39; A73G; C114T; A263G             | 16569 | Asia_W                | K1a1b1a    | K           | K            | 39             |
| 3403 | JQ705205.1           | JQ705205.1; H1a6; Asia_W_Europe; 16; A73G; C151T; A263G         | 16570 | Asia_W_Europe         | H1a6       | H           | H            | 16             |

**Supplementary Table S3** Human mitochondrial database (hMITO DB v1.0) metadata

| Row  | Name (accession no.) | Description                                                     | Size  | Geo_Region          | Haplogroup | Macro_Haplo | Macro_Haplo2 | Total Variants |
|------|----------------------|-----------------------------------------------------------------|-------|---------------------|------------|-------------|--------------|----------------|
| 3404 | JQ705206.1           | JQ705206.1; H6a1a; Asia_W_Europe; 15; T239C; A263G; C309CCT     | 16570 | Asia_W_Europe       | H6a1a      | H           | H            | 15             |
| 3405 | JQ705207.1           | JQ705207.1; T1a1; Asia_W; 35; A73G; T152C; A263G                | 16570 | Asia_W              | T1a1       | T           | T            | 35             |
| 3406 | JQ705208.1           | JQ705208.1; T2b2b1; Asia_W; 35; A73G; A263G; C315CC             | 16569 | Asia_W              | T2b2b1     | T           | T            | 35             |
| 3407 | JQ705209.1           | JQ705209.1; W6a; Asia_W; 39; A73G; A189G; C194T                 | 16573 | Asia_W              | W6a        | W           | W            | 39             |
| 3408 | JQ705210.1           | JQ705210.1; H1g1; Asia_W_Europe; 14; A263G; C309CCCT; T310C     | 16571 | Asia_W_Europe       | H1g1       | H           | H            | 14             |
| 3409 | JQ705211.1           | JQ705211.1; U5a1b1e; Asia_W_Europe_C; 31; A73G; A263G; C315CC   | 16567 | Asia_W_Europe_C     | U5a1b1e    | U           | U5           | 31             |
| 3410 | JQ705212.1           | JQ705212.1; J1c3g; Asia_W; 28; A73G; G185A; A263G               | 16569 | Asia_W              | J1c3g      | J           | J            | 28             |
| 3411 | JQ705213.1           | JQ705213.1; H1br; Asia_W_Europe; 13; A263G; C315CC; A750G       | 16569 | Asia_W_Europe       | H1br       | H           | H            | 13             |
| 3412 | JQ705214.1           | JQ705214.1; J2a1a1a2; Asia_W; 44; A73G; T146C; C150T            | 16570 | Asia_W              | J2a1a1a2   | J           | J            | 44             |
| 3413 | JQ705215.1           | JQ705215.1; K1a4a1c1; Asia_W; 38; A73G; T199C; T204C            | 16570 | Asia_W              | K1a4a1c1   | K           | K            | 38             |
| 3414 | JQ705216.1           | JQ705216.1; H1c1; Asia_W_Europe; 13; A263G; C315CC; T477C       | 16569 | Asia_W_Europe       | H1c1       | H           | H            | 13             |
| 3415 | JQ705217.1           | JQ705217.1; X2m2; Asia_W_America_N; 33; A73G; G143A; T195C      | 16570 | Asia_W_America_N    | X2m2       | X           | X            | 33             |
| 3416 | JQ705218.1           | JQ705218.1; K1a24a; Asia_W; 38; A73G; C150T; T195C              | 16569 | Asia_W              | K1a24a     | K           | K            | 38             |
| 3417 | JQ705219.1           | JQ705219.1; H4a1a1a1a1; Asia_W_Europe; 22; A73G; A263G; C315CC  | 16567 | Asia_W_Europe       | H4a1a1a1a1 | H           | H            | 22             |
| 3418 | JQ705220.1           | JQ705220.1; U5a1b1a; Asia_W_Europe_C; 32; A73G; T199C; A263G    | 16569 | Asia_W_Europe_C     | U5a1b1a    | U           | U5           | 32             |
| 3419 | JQ705221.1           | JQ705221.1; T2f3; Asia_W; 36; A73G; A263G; C309CCT              | 16559 | Asia_W              | T2f3       | T           | T            | 36             |
| 3420 | JQ705222.1           | JQ705222.1; C4a2a1; Asia_NE_America_N_S; 51; A73G; G207A; A249d | 16570 | Asia_NE_America_N_S | C4a2a1     | C           | C            | 51             |
| 3421 | JQ705223.1           | JQ705223.1; H2a1j; Asia_W_Europe; 11; A263G; C309CCCT; T310C    | 16571 | Asia_W_Europe       | H2a1j      | H           | H            | 11             |
| 3422 | JQ705224.1           | JQ705224.1; J1c2k; Asia_W; 34; A73G; G185A; A188G               | 16572 | Asia_W              | J1c2k      | J           | J            | 34             |
| 3423 | JQ705225.1           | JQ705225.1; K1b1a1+199; Asia_W; 43; A73G; T152C; T199C          | 16572 | Asia_W              | K1b1a1+199 | K           | K            | 43             |
| 3424 | JQ705226.1           | JQ705226.1; H23; Asia_W_Europe; 10; A263G; C315CC; A750G        | 16569 | Asia_W_Europe       | H23        | H           | H            | 10             |
| 3425 | JQ705227.1           | JQ705227.1; H2b; Asia_W_Europe; 10; T152C; A263G; C315CC        | 16569 | Asia_W_Europe       | H2b        | H           | H            | 10             |
| 3426 | JQ705228.1           | JQ705228.1; U5a2d1a; Asia_W_Europe_C; 33; A73G; A263G; C309CCT  | 16568 | Asia_W_Europe_C     | U5a2d1a    | U           | U5           | 33             |
| 3427 | JQ705229.1           | JQ705229.1; K1a4a1; Asia_W; 37; A73G; T146C; A263G              | 16570 | Asia_W              | K1a4a1     | K           | K            | 37             |
| 3428 | JQ705230.1           | JQ705230.1; H7d2a; Asia_W_Europe; 14; A263G; A291AA; C315CC     | 16570 | Asia_W_Europe       | H7d2a      | H           | H            | 14             |
| 3429 | JQ705231.1           | JQ705231.1; H1b; Asia_W_Europe; 13; A263G; C309CCT; T310C       | 16570 | Asia_W_Europe       | H1b        | H           | H            | 13             |
| 3430 | JQ705232.1           | JQ705232.1; H45a; Asia_W_Europe; 11; A263G; C315CC; A750G       | 16569 | Asia_W_Europe       | H45a       | H           | H            | 11             |
| 3431 | JQ705233.1           | JQ705233.1; H14a2a; Asia_W_Europe; 17; A263G; C309CCT; T310C    | 16570 | Asia_W_Europe       | H14a2a     | H           | H            | 17             |
| 3432 | JQ705234.1           | JQ705234.1; HV2a1; Asia_W; 29; T72C; A73G; C151T                | 16570 | Asia_W              | HV2a1      | HV          | HV           | 29             |
| 3433 | JQ705235.1           | JQ705235.1; H1; Asia_W_Europe; 11; A263G; T310C; A750G          | 16568 | Asia_W_Europe       | H1         | H           | H            | 11             |
| 3434 | JQ705236.1           | JQ705236.1; H1e4a; Asia_W_Europe; 12; A263G; C315CC; A750G      | 16569 | Asia_W_Europe       | H1e4a      | H           | H            | 12             |
| 3435 | JQ705237.1           | JQ705237.1; H5a1g2; Asia_W_Europe; 14; A263G; C315CC; C456T     | 16567 | Asia_W_Europe       | H5a1g2     | H           | H            | 14             |
| 3436 | JQ705238.1           | JQ705238.1; H1c17; Asia_W_Europe; 12; T46C; A263G; C315CC       | 16569 | Asia_W_Europe       | H1c17      | H           | H            | 12             |
| 3437 | JQ705239.1           | JQ705239.1; H1b; Asia_W_Europe; 17; T152C; A263G; C309CCT       | 16570 | Asia_W_Europe       | H1b        | H           | H            | 17             |
| 3438 | JQ705240.1           | JQ705240.1; U5b2a1a2; Asia_W_Europe_C; 31; A73G; C150T; A263G   | 16569 | Asia_W_Europe_C     | U5b2a1a2   | U           | U5           | 31             |
| 3439 | JQ705241.1           | JQ705241.1; H5a1h; Asia_W_Europe; 13; A263G; C315CC; C456T      | 16567 | Asia_W_Europe       | H5a1h      | H           | H            | 13             |
| 3440 | JQ705242.1           | JQ705242.1; T2b4+152; Asia_W; 34; A73G; T152C; A263G            | 16569 | Asia_W              | T2b4+152   | T           | T            | 34             |
| 3441 | JQ705243.1           | JQ705243.1; U5a1a1g; Asia_W_Europe_C; 28; A73G; A263G; C315CC   | 16569 | Asia_W_Europe_C     | U5a1a1g    | U           | U5           | 28             |
| 3442 | JQ705244.1           | JQ705244.1; I2d; Asia_W_SW; 37; A73G; T152C; T204C              | 16572 | Asia_W_SW           | I2d        | I           | I            | 37             |
| 3443 | JQ705245.1           | JQ705245.1; U5a1b1a1; Asia_W_Europe_C; 28; A73G; A263G; C315CC  | 16569 | Asia_W_Europe_C     | U5a1b1a1   | U           | U5           | 28             |
| 3444 | JQ705246.1           | JQ705246.1; K1b2a1a1; Asia_W; 39; A73G; T146C; T195C            | 16573 | Asia_W              | K1b2a1a1   | K           | K            | 39             |

**Supplementary Table S3** Human mitochondrial database (hMITO DB v1.0) metadata

| Row  | Name (accession no.) | Description                                                      | Size  | Geo_Region            | Haplogroup | Macro_Haplo | Macro_Haplo2 | Total Variants |
|------|----------------------|------------------------------------------------------------------|-------|-----------------------|------------|-------------|--------------|----------------|
| 3445 | JQ705247.1           | JQ705247.1; J1b1a1; Asia_W; 36; A73G; T195C; C242T               | 16569 | Asia_W                | J1b1a1     | J           | J            | 36             |
| 3446 | JQ705248.1           | JQ705248.1; H4a1a4b; Asia_W_Europe; 21; T195C; A263G; C315CC     | 16567 | Asia_W_Europe         | H4a1a4b    | H           | H            | 21             |
| 3447 | JQ705249.1           | JQ705249.1; L1b1a6; Africa_C; 82; A73G; T152C; C182T             | 16567 | Africa_C              | L1b1a6     | L1          | L1           | 82             |
| 3448 | JQ705250.1           | JQ705250.1; L2a1a2; Africa_W_C; 57; A73G; T146C; T152C           | 16567 | Africa_W_C            | L2a1a2     | L2          | L2           | 57             |
| 3449 | JQ705251.1           | JQ705251.1; D2a1a; Asia_E_America_N_S; 42; A73G; A153G; A263G    | 16570 | Asia_E_America_N_S    | D2a1a      | D           | D            | 42             |
| 3450 | JQ705252.1           | JQ705252.1; H1g1; Asia_W_Europe; 14; T152C; A263G; C315CC        | 16569 | Asia_W_Europe         | H1g1       | H           | H            | 14             |
| 3451 | JQ705253.1           | JQ705253.1; V; Europe_S; 17; T72C; C194T; A263G                  | 16570 | Europe_S              | V          | V           | V            | 17             |
| 3452 | JQ705254.1           | JQ705254.1; V2c; Europe_S; 16; T72C; A263G; C315CC               | 16569 | Europe_S              | V2c        | V           | V            | 16             |
| 3453 | JQ705255.1           | JQ705255.1; U4b1a1a; Asia_N_Europe_N; 32; A73G; T195C; A263G     | 16569 | Asia_N_Europe_N       | U4b1a1a    | U           | U4           | 32             |
| 3454 | JQ705256.1           | JQ705256.1; H1e1; Asia_W_Europe; 13; A263G; C315CC; A750G        | 16569 | Asia_W_Europe         | H1e1       | H           | H            | 13             |
| 3455 | JQ705257.1           | JQ705257.1; K1b2a; Asia_W; 35; A73G; T146C; T195C                | 16571 | Asia_W                | K1b2a      | K           | K            | 35             |
| 3456 | JQ705258.1           | JQ705258.1; H27; Asia_W_Europe; 11; A263G; C315CC; A750G         | 16569 | Asia_W_Europe         | H27        | H           | H            | 11             |
| 3457 | JQ705259.1           | JQ705259.1; B2y1; Asia_SE_E_America_N_S; 31; A73G; T146C; A263G  | 16561 | Asia_SE_E_America_N_S | B2y1       | B           | B            | 31             |
| 3458 | JQ705260.1           | JQ705260.1; H24a; Asia_W_Europe; 11; A263G; C309CCCT; T310C      | 16571 | Asia_W_Europe         | H24a       | H           | H            | 11             |
| 3459 | JQ705261.1           | JQ705261.1; HV+16311; Asia_W_Europe; 13; T195C; A263G; C309CCCT  | 16570 | Asia_W_Europe         | HV+16311   | H           | H            | 13             |
| 3460 | JQ705262.1           | JQ705262.1; M37e(M37e); Asia_S; 3; C315CC; A8701G; C16295T       | 16569 | Asia_S                | M37e(M37e) | M           | M            | 3              |
| 3461 | JQ705263.1           | JQ705263.1; H4a1a1a; Asia_W_Europe; 19; A73G; A263G; C309CCCT    | 16568 | Asia_W_Europe         | H4a1a1a    | H           | H            | 19             |
| 3462 | JQ705264.1           | JQ705264.1; H10e2; Asia_W_Europe; 13; A263G; C309CCCT; T310C     | 16570 | Asia_W_Europe         | H10e2      | H           | H            | 13             |
| 3463 | JQ705265.1           | JQ705265.1; H2a2a1g; Asia_W_Europe; 2; C315CC; T16189C;          | 16569 | Asia_W_Europe         | H2a2a1g    | H           | H            | 2              |
| 3464 | JQ705266.1           | JQ705266.1; T1a1; Asia_W; 36; A73G; T152C; T195C                 | 16570 | Asia_W                | T1a1       | T           | T            | 36             |
| 3465 | JQ705267.1           | JQ705267.1; U5b1e1; Asia_W_Europe_C; 30; A73G; C150T; T152C      | 16567 | Asia_W_Europe_C       | U5b1e1     | U           | U5           | 30             |
| 3466 | JQ705268.1           | JQ705268.1; N1b1a2; Africa_NE_Asia_W; 39; A73G; T152C; A263G     | 16570 | Africa_NE_Asia_W      | N1b1a2     | N           | N1           | 39             |
| 3467 | JQ705269.1           | JQ705269.1; T1a1; Asia_W; 36; A73G; T152C; T195C                 | 16570 | Asia_W                | T1a1       | T           | T            | 36             |
| 3468 | JQ705270.1           | JQ705270.1; K1a4a1a2a; Asia_W; 40; A73G; A263G; C309CCCT         | 16574 | Asia_W                | K1a4a1a2a  | K           | K            | 40             |
| 3469 | JQ705271.1           | JQ705271.1; J1c7a; Asia_W; 36; A73G; G185A; T195C                | 16572 | Asia_W                | J1c7a      | J           | J            | 36             |
| 3470 | JQ705272.1           | JQ705272.1; U5a1h; Asia_W_Europe_C; 37; A73G; C150T; G207A       | 16570 | Asia_W_Europe_C       | U5a1h      | U           | U5           | 37             |
| 3471 | JQ705273.1           | JQ705273.1; V; Europe_S; 15; T72C; A263G; C309CCCT               | 16570 | Europe_S              | V          | V           | V            | 15             |
| 3472 | JQ705274.1           | JQ705274.1; H10; Asia_W_Europe; 12; A263G; C309CCCT; T310C       | 16570 | Asia_W_Europe         | H10        | H           | H            | 12             |
| 3473 | JQ705275.1           | JQ705275.1; L1c1a; Africa_C; 93; A73G; C151T; T152C              | 16566 | Africa_C              | L1c1a      | L1          | L1           | 93             |
| 3474 | JQ705276.1           | JQ705276.1; H66a; Asia_W_Europe; 11; A263G; C315CC; A750G        | 16569 | Asia_W_Europe         | H66a       | H           | H            | 11             |
| 3475 | JQ705277.1           | JQ705277.1; U6a1a1; Asia_SW_Africa_N; 30; A73G; A263G; C309CCCT  | 16570 | Asia_SW_Africa_N      | U6a1a1     | U           | U6           | 30             |
| 3476 | JQ705278.1           | JQ705278.1; W5a2b; Asia_W; 42; A73G; C150T; A189G                | 16567 | Asia_W                | W5a2b      | W           | W            | 42             |
| 3477 | JQ705279.1           | JQ705279.1; U5a1a2b1; Asia_W_Europe_C; 33; A73G; A263G; C309CCCT | 16570 | Asia_W_Europe_C       | U5a1a2b1   | U           | U5           | 33             |
| 3478 | JQ705280.1           | JQ705280.1; J1c3b; Asia_W; 30; A73G; G185A; A263G                | 16569 | Asia_W                | J1c3b      | J           | J            | 30             |
| 3479 | JQ705281.1           | JQ705281.1; U8a1a1a1; Asia_W_Europe ; 33; A73G; A263G; T282C     | 16570 | Asia_W_Europe         | U8a1a1a1   | U           | U8           | 33             |
| 3480 | JQ705282.1           | JQ705282.1; N9a2a; Africa_NE_Asia_E; 28; A73G; C150T; A263G      | 16570 | Africa_NE_Asia_E      | N9a2a      | N           | N9           | 28             |
| 3481 | JQ705283.1           | JQ705283.1; H48; Asia_W_Europe; 12; A263G; C264T; C315CC         | 16569 | Asia_W_Europe         | H48        | H           | H            | 12             |
| 3482 | JQ705284.1           | JQ705284.1; H10a1; Asia_W_Europe; 14; A263G; C309CCCT; T310C     | 16570 | Asia_W_Europe         | H10a1      | H           | H            | 14             |
| 3483 | JQ705285.1           | JQ705285.1; L3e4a; Africa_E; 36; A73G; C150T; A263G              | 16577 | Africa_E              | L3e4a      | L3          | L3           | 36             |
| 3484 | JQ705286.1           | JQ705286.1; W3a1a1; Asia_W; 40; A73G; A189G; T195C               | 16570 | Asia_W                | W3a1a1     | W           | W            | 40             |
| 3485 | JQ705287.1           | JQ705287.1; H14a; Asia_W_Europe; 20; A263G; C309CCCT; T310C      | 16570 | Asia_W_Europe         | H14a       | H           | H            | 20             |

**Supplementary Table S3** Human mitochondrial database (hMITO DB v1.0) metadata

| Row  | Name (accession no.) | Description                                                    | Size  | Geo_Region        | Haplogroup | Macro_ Haplo | Macro_ Haplo2 | Total Variants |
|------|----------------------|----------------------------------------------------------------|-------|-------------------|------------|--------------|---------------|----------------|
| 3486 | JQ705288.1           | JQ705288.1; K1a; Asia_W; 32; A73G; T146C; T152C                | 16569 | Asia_W            | K1a        | K            | K             | 32             |
| 3487 | JQ705289.1           | JQ705289.1; K1b2a1a; Asia_W; 38; A73G; T146C; T195C            | 16569 | Asia_W            | K1b2a1a    | K            | K             | 38             |
| 3488 | JQ705290.1           | JQ705290.1; U5a1c1; Asia_W_Europe_C; 29; A73G; T195C; A263G    | 16571 | Asia_W_Europe_C   | U5a1c1     | U            | U5            | 29             |
| 3489 | JQ705291.1           | JQ705291.1; K1c2a; Asia_W; 38; A73G; T146C; T152C              | 16569 | Asia_W            | K1c2a      | K            | K             | 38             |
| 3490 | JQ705292.1           | JQ705292.1; U1b3; Asia_W; 37; A73G; T146C; T152C               | 16569 | Asia_W            | U1b3       | U            | U1            | 37             |
| 3491 | JQ705293.1           | JQ705293.1; A2f1a; Asia_NE_America_N; 40; C64T; A73G; T146C    | 16567 | Asia_NE_America_N | A2f1a      | A            | A             | 40             |
| 3492 | JQ705294.1           | JQ705294.1; H1j; Asia_W_Europe; 10; A263G; C315CC; A750G       | 16569 | Asia_W_Europe     | H1j        | H            | H             | 10             |
| 3493 | JQ705295.1           | JQ705295.1; R1a1a; Asia_S_SE; 39; A73G; T204C; G207A           | 16571 | Asia_S_SE         | R1a1a      | R            | R1            | 39             |
| 3494 | JQ705296.1           | JQ705296.1; H1; Asia_W_Europe; 12; A263G; C309CCCT; T310C      | 16569 | Asia_W_Europe     | H1         | H            | H             | 12             |
| 3495 | JQ705297.1           | JQ705297.1; U5a1b1c1; Asia_W_Europe_C; 29; A73G; A263G; C315CC | 16569 | Asia_W_Europe_C   | U5a1b1c1   | U            | U5            | 29             |
| 3496 | JQ705298.1           | JQ705298.1; U5b2a4a; Asia_W_Europe_C; 33; A73G; C150T; A263G   | 16569 | Asia_W_Europe_C   | U5b2a4a    | U            | U5            | 33             |
| 3497 | JQ705299.1           | JQ705299.1; H79a; Asia_W_Europe; 12; A263G; C315CC; CA522d     | 16567 | Asia_W_Europe     | H79a       | H            | H             | 12             |
| 3498 | JQ705300.1           | JQ705300.1; T2; Asia_W; 34; A73G; A263G; C309CCCT              | 16570 | Asia_W            | T2         | T            | T             | 34             |
| 3499 | JQ705301.1           | JQ705301.1; K2a6; Asia_W; 34; A73G; T146C; T152C               | 16570 | Asia_W            | K2a6       | K            | K             | 34             |
| 3500 | JQ705302.1           | JQ705302.1; V19; Europe_S; 17; T72C; C150T; A263G              | 16570 | Europe_S          | V19        | V            | V             | 17             |
| 3501 | JQ705303.1           | JQ705303.1; I4a; Asia_W_SW; 34; A73G; T199C; T204C             | 16567 | Asia_W_SW         | I4a        | I            | I             | 34             |
| 3502 | JQ705304.1           | JQ705304.1; I2; Asia_W_SW; 36; A73G; T152C; T199C              | 16573 | Asia_W_SW         | I2         | I            | I             | 36             |
| 3503 | JQ705305.1           | JQ705305.1; R0a4; Africa_NE_Asia_W; 22; T57TC; C64T; C150T     | 16571 | Africa_NE_Asia_W  | R0a4       | R            | R0            | 22             |
| 3504 | JQ705306.1           | JQ705306.1; H1a5; Asia_W_Europe; 16; A73G; T152C; A263G        | 16570 | Asia_W_Europe     | H1a5       | H            | H             | 16             |
| 3505 | JQ705307.1           | JQ705307.1; H7f; Asia_W_Europe; 11; A263G; C315CC; A750G       | 16569 | Asia_W_Europe     | H7f        | H            | H             | 11             |
| 3506 | JQ705308.1           | JQ705308.1; J1c3e2; Asia_W; 32; A73G; G185A; G228A             | 16569 | Asia_W            | J1c3e2     | J            | J             | 32             |
| 3507 | JQ705309.1           | JQ705309.1; V; Europe_S; 19; T72C; A263G; C309CCCT             | 16571 | Europe_S          | V          | V            | V             | 19             |
| 3508 | JQ705310.1           | JQ705310.1; L3k1; Africa_E; 39; A73G; C150T; T152C             | 16569 | Africa_E          | L3k1       | L3           | L3            | 39             |
| 3509 | JQ705311.1           | JQ705311.1; H1a; Asia_W_Europe; 13; A73G; A263G; C309CCCT      | 16570 | Asia_W_Europe     | H1a        | H            | H             | 13             |
| 3510 | JQ705312.1           | JQ705312.1; H28a; Asia_W_Europe; 14; C186A; A263G; C309CCCT    | 16571 | Asia_W_Europe     | H28a       | H            | H             | 14             |
| 3511 | JQ705313.1           | JQ705313.1; W3a; Asia_W; 35; A73G; A189G; C194T                | 16569 | Asia_W            | W3a        | W            | W             | 35             |
| 3512 | JQ705314.1           | JQ705314.1; A2ae; Asia_NE_America_N; 36; C64T; A73G; T146C     | 16568 | Asia_NE_America_N | A2ae       | A            | A             | 36             |
| 3513 | JQ705315.1           | JQ705315.1; H5a1; Asia_W_Europe; 14; A263G; C309CCCT; T310C    | 16570 | Asia_W_Europe     | H5a1       | H            | H             | 14             |
| 3514 | JQ705316.1           | JQ705316.1; U5b2a5; Asia_W_Europe_C; 34; A73G; C150T; A263G    | 16570 | Asia_W_Europe_C   | U5b2a5     | U            | U5            | 34             |
| 3515 | JQ705317.1           | JQ705317.1; K1c2; Asia_W; 38; A73G; T146C; T152C               | 16571 | Asia_W            | K1c2       | K            | K             | 38             |
| 3516 | JQ705318.1           | JQ705318.1; U5a1a1d1; Asia_W_Europe_C; 32; A73G; G185A; A189G  | 16570 | Asia_W_Europe_C   | U5a1a1d1   | U            | U5            | 32             |
| 3517 | JQ705319.1           | JQ705319.1; J1d1a1; Asia_W; 37; A73G; T152C; A263G             | 16573 | Asia_W            | J1d1a1     | J            | J             | 37             |
| 3518 | JQ705320.1           | JQ705320.1; L3e4a1; Africa_E; 34; A73G; C150T; A263G           | 16568 | Africa_E          | L3e4a1     | L3           | L3            | 34             |
| 3519 | JQ705321.1           | JQ705321.1; X2b4; Asia_W_America_N; 33; A73G; A153G; T195C     | 16570 | Asia_W_America_N  | X2b4       | X            | X             | 33             |
| 3520 | JQ705322.1           | JQ705322.1; J1c7a; Asia_W; 35; A73G; T146C; G185A              | 16569 | Asia_W            | J1c7a      | J            | J             | 35             |
| 3521 | JQ705323.1           | JQ705323.1; J2a1a1a3; Asia_W; 44; A73G; C150T; T152C           | 16568 | Asia_W            | J2a1a1a3   | J            | J             | 44             |
| 3522 | JQ705324.1           | JQ705324.1; H10e; Asia_W_Europe; 11; A263G; C309CCCT; T310C    | 16571 | Asia_W_Europe     | H10e       | H            | H             | 11             |
| 3523 | JQ705325.1           | JQ705325.1; H6a1a; Asia_W_Europe; 15; T239C; A249d; A263G      | 16568 | Asia_W_Europe     | H6a1a      | H            | H             | 15             |
| 3524 | JQ705326.1           | JQ705326.1; U5a1i1; Asia_W_Europe_C; 30; A73G; A263G; C315CC   | 16569 | Asia_W_Europe_C   | U5a1i1     | U            | U5            | 30             |
| 3525 | JQ705327.1           | JQ705327.1; K2b1a1a; Asia_W; 35; A73G; T146C; A263G            | 16569 | Asia_W            | K2b1a1a    | K            | K             | 35             |
| 3526 | JQ705328.1           | JQ705328.1; T2b; Asia_W; 34; A73G; A263G; C315CC               | 16569 | Asia_W            | T2b        | T            | T             | 34             |

**Supplementary Table S3** Human mitochondrial database (hMITO DB v1.0) metadata

| Row  | Name (accession no.) | Description                                                         | Size  | Geo_Region            | Haplogroup    | Macro_Haplo | Macro_Haplo2 | Total Variants |
|------|----------------------|---------------------------------------------------------------------|-------|-----------------------|---------------|-------------|--------------|----------------|
| 3527 | JQ705329.1           | JQ705329.1; H3a1a; Asia_W_Europe; 14; T152C; A263G; C309CCT         | 16570 | Asia_W_Europe         | H3a1a         | H           | H            | 14             |
| 3528 | JQ705330.1           | JQ705330.1; H1e1a; Asia_W_Europe; 13; A263G; C315CC; T408A          | 16569 | Asia_W_Europe         | H1e1a         | H           | H            | 13             |
| 3529 | JQ705331.1           | JQ705331.1; H1e1a8; Asia_W_Europe; 18; T195C; A263G; C315CC         | 16571 | Asia_W_Europe         | H1e1a8        | H           | H            | 18             |
| 3530 | JQ705332.1           | JQ705332.1; J1c7a; Asia_W; 35; A73G; T146C; G185A                   | 16569 | Asia_W                | J1c7a         | J           | J            | 35             |
| 3531 | JQ705333.1           | JQ705333.1; X2b4; Asia_W_America_N; 33; A73G; A153G; T195C          | 16571 | Asia_W_America_N      | X2b4          | X           | X            | 33             |
| 3532 | JQ705334.1           | JQ705334.1; X2b+226+16192; Asia_W_America_N; 33; A73G; A153G; T195C | 16572 | Asia_W_America_N      | X2b+226+16192 | X           | X            | 33             |
| 3533 | JQ705335.1           | JQ705335.1; T1a1; Asia_W; 37; A73G; T152C; T195C                    | 16570 | Asia_W                | T1a1          | T           | T            | 37             |
| 3534 | JQ705336.1           | JQ705336.1; K1a11a1; Asia_W; 38; A16T; A73G; C150T                  | 16560 | Asia_W                | K1a11a1       | K           | K            | 38             |
| 3535 | JQ705337.1           | JQ705337.1; U5b2a4; Asia_W_Europe_C; 31; A73G; C150T; A263G         | 16569 | Asia_W_Europe_C       | U5b2a4        | U           | U5           | 31             |
| 3536 | JQ705338.1           | JQ705338.1; T2b21b; Asia_W; 39; A73G; T152C; A263G                  | 16570 | Asia_W                | T2b21b        | T           | T            | 39             |
| 3537 | JQ705339.1           | JQ705339.1; H4a1a1a; Asia_W_Europe; 19; A73G; A263G; C309CCT        | 16568 | Asia_W_Europe         | H4a1a1a       | H           | H            | 19             |
| 3538 | JQ705340.1           | JQ705340.1; H3c2b1; Asia_W_Europe; 14; T195C; A263G; C315CC         | 16569 | Asia_W_Europe         | H3c2b1        | H           | H            | 14             |
| 3539 | JQ705341.1           | JQ705341.1; H3ao1; Asia_W_Europe; 15; T152C; T195C; A263G           | 16570 | Asia_W_Europe         | H3ao1         | H           | H            | 15             |
| 3540 | JQ705342.1           | JQ705342.1; U4b1b1; Asia_N_Europe_N; 33; A73G; T146C; T152C         | 16571 | Asia_N_Europe_N       | U4b1b1        | U           | U4           | 33             |
| 3541 | JQ705343.1           | JQ705343.1; H1aa1; Asia_W_Europe; 13; A263G; C315CC; A750G          | 16569 | Asia_W_Europe         | H1aa1         | H           | H            | 13             |
| 3542 | JQ705344.1           | JQ705344.1; HV4a1; Asia_W; 18; T146C; A263G; C309CCT                | 16570 | Asia_W                | HV4a1         | HV          | HV           | 18             |
| 3543 | JQ705345.1           | JQ705345.1; H13a1a1; Asia_W_Europe; 17; C150T; T152C; A263G         | 16570 | Asia_W_Europe         | H13a1a1       | H           | H            | 17             |
| 3544 | JQ705346.1           | JQ705346.1; U8a1a1b1; Asia_W_Europe ; 33; A73G; A263G; T282C        | 16570 | Asia_W_Europe         | U8a1a1b1      | U           | U8           | 33             |
| 3545 | JQ705347.1           | JQ705347.1; U8a1a1; Asia_W_Europe ; 30; A73G; A263G; T282C          | 16570 | Asia_W_Europe         | U8a1a1        | U           | U8           | 30             |
| 3546 | JQ705348.1           | JQ705348.1; A2n; Asia_NE_America_N; 45; C64T; A73G; T146C           | 16568 | Asia_NE_America_N     | A2n           | A           | A            | 45             |
| 3547 | JQ705349.1           | JQ705349.1; B2c2b; Asia_SE_E_America_N_S; 38; A73G; T146C; T152C    | 16562 | Asia_SE_E_America_N_S | B2c2b         | B           | B            | 38             |
| 3548 | JQ705350.1           | JQ705350.1; H1b3; Asia_W_Europe; 17; A263G; C309CCCT; T310C         | 16571 | Asia_W_Europe         | H1b3          | H           | H            | 17             |
| 3549 | JQ705351.1           | JQ705351.1; T2b; Asia_W; 36; A73G; A263G; C309CCT                   | 16570 | Asia_W                | T2b           | T           | T            | 36             |
| 3550 | JQ705352.1           | JQ705352.1; T1a3a; Asia_W; 38; A73G; T152C; T195C                   | 16570 | Asia_W                | T1a3a         | T           | T            | 38             |
| 3551 | JQ705353.1           | JQ705353.1; T1a1; Asia_W; 36; A73G; T152C; T195C                    | 16571 | Asia_W                | T1a1          | T           | T            | 36             |
| 3552 | JQ705354.1           | JQ705354.1; K1a2a; Asia_W; 38; A73G; T152C; A263G                   | 16581 | Asia_W                | K1a2a         | K           | K            | 38             |
| 3553 | JQ705355.1           | JQ705355.1; U5b1b2; Asia_W_Europe_C; 28; A73G; C150T; T217C         | 16571 | Asia_W_Europe_C       | U5b1b2        | U           | U5           | 28             |
| 3554 | JQ705356.1           | JQ705356.1; J2b1a1; Asia_W; 41; A73G; C150T; T152C                  | 16570 | Asia_W                | J2b1a1        | J           | J            | 41             |
| 3555 | JQ705357.1           | JQ705357.1; T2b6+146; Asia_W; 39; A73G; T146C; A263G                | 16569 | Asia_W                | T2b6+146      | T           | T            | 39             |
| 3556 | JQ705358.1           | JQ705358.1; J2a1a1; Asia_W; 39; A73G; C150T; T152C                  | 16570 | Asia_W                | J2a1a1        | J           | J            | 39             |
| 3557 | JQ705359.1           | JQ705359.1; U5a2a1+152; Asia_W_Europe_C; 29; A73G; T152C; A263G     | 16569 | Asia_W_Europe_C       | U5a2a1+152    | U           | U5           | 29             |
| 3558 | JQ705360.1           | JQ705360.1; J1c3; Asia_W; 31; A73G; G228A; A263G                    | 16569 | Asia_W                | J1c3          | J           | J            | 31             |
| 3559 | JQ705361.1           | JQ705361.1; L3b1a; Africa_E; 39; A73G; A263G; C315CC                | 16566 | Africa_E              | L3b1a         | L3          | L3           | 39             |
| 3560 | JQ705362.1           | JQ705362.1; H1av; Asia_W_Europe; 14; A263G; C309CCCT; T310C         | 16571 | Asia_W_Europe         | H1av          | H           | H            | 14             |
| 3561 | JQ705363.1           | JQ705363.1; U4a2a; Asia_N_Europe_N; 27; A73G; T195C; A263G          | 16568 | Asia_N_Europe_N       | U4a2a         | U           | U4           | 27             |
| 3562 | JQ705364.1           | JQ705364.1; I1c1a; Asia_W_SW; 44; A73G; T199C; T204C                | 16573 | Asia_W_SW             | I1c1a         | I           | I            | 44             |
| 3563 | JQ705365.1           | JQ705365.1; H2a2b1; Asia_W_Europe; 11; C182T; A263G; C309CCCT       | 16571 | Asia_W_Europe         | H2a2b1        | H           | H            | 11             |
| 3564 | JQ705366.1           | JQ705366.1; H27; Asia_W_Europe; 11; A263G; C315CC; A750G            | 16569 | Asia_W_Europe         | H27           | H           | H            | 11             |
| 3565 | JQ705367.1           | JQ705367.1; H1b1+16362; Asia_W_Europe; 17; A263G; C309CCCT; T310C   | 16569 | Asia_W_Europe         | H1b1+16362    | H           | H            | 17             |
| 3566 | JQ705368.1           | JQ705368.1; HV9a; Asia_W; 15; T131C; T152C; A263G                   | 16570 | Asia_W                | HV9a          | HV          | HV           | 15             |
| 3567 | JQ705369.1           | JQ705369.1; R0a1a; Africa_NE_Asia_W; 25; T58C; C64T; T146C          | 16570 | Africa_NE_Asia_W      | R0a1a         | R           | R0           | 25             |

**Supplementary Table S3** Human mitochondrial database (hMITO DB v1.0) metadata

| Row  | Name (accession no.) | Description                                                        | Size  | Geo_Region          | Haplogroup | Macro_Haplo | Macro_Haplo2 | Total Variants |
|------|----------------------|--------------------------------------------------------------------|-------|---------------------|------------|-------------|--------------|----------------|
| 3568 | JQ705370.1           | JQ705370.1; H2a1k; Asia_W_Europe; 11; A263G; C309CCT; T310C        | 16571 | Asia_W_Europe       | H2a1k      | H           | H            | 11             |
| 3569 | JQ705371.1           | JQ705371.1; H1ap1; Asia_W_Europe; 15; T152C; A263G; C309CCT        | 16570 | Asia_W_Europe       | H1ap1      | H           | H            | 15             |
| 3570 | JQ705372.1           | JQ705372.1; T1b3; Asia_W; 36; A73G; A263G; C309CCT                 | 16572 | Asia_W              | T1b3       | T           | T            | 36             |
| 3571 | JQ705373.1           | JQ705373.1; H; Asia_W_Europe; 10; A263G; C315CC; A750G             | 16569 | Asia_W_Europe       | H          | H           | H            | 10             |
| 3572 | JQ705374.1           | JQ705374.1; X2b6a; Asia_W_America_N; 36; A73G; A153G; T195C        | 16569 | Asia_W_America_N    | X2b6a      | X           | X            | 36             |
| 3573 | JQ705375.1           | JQ705375.1; M7c1a1a1; Asia_E_SE; 43; A73G; T146C; T199C            | 16568 | Asia_E_SE           | M7c1a1a1   | M           | M7           | 43             |
| 3574 | JQ705376.1           | JQ705376.1; I1b; Asia_W_SW; 39; A73G; T199C; T204C                 | 16575 | Asia_W_SW           | I1b        | I           | I            | 39             |
| 3575 | JQ705377.1           | JQ705377.1; I3b; Asia_W_SW; 38; A73G; T152C; T199C                 | 16576 | Asia_W_SW           | I3b        | I           | I            | 38             |
| 3576 | JQ705378.1           | JQ705378.1; I1a1a3; Asia_W_SW; 49; A73G; A189G; T199C              | 16573 | Asia_W_SW           | I1a1a3     | I           | I            | 49             |
| 3577 | JQ705379.1           | JQ705379.1; I2; Asia_W_SW; 36; A73G; T152C; T199C                  | 16573 | Asia_W_SW           | I2         | I           | I            | 36             |
| 3578 | JQ705380.1           | JQ705380.1; A2z; Asia_NE_America_N; 36; A73G; T146C; T152C         | 16569 | Asia_NE_America_N   | A2z        | A           | A            | 36             |
| 3579 | JQ705381.1           | JQ705381.1; C4c2; Asia_NE_America_N_S; 47; C96T; GGAGCC100-; C114T | 16565 | Asia_NE_America_N_S | C4c2       | C           | C            | 47             |
| 3580 | JQ705382.1           | JQ705382.1; I6a; Asia_W_SW; 41; A73G; T199C; G203A                 | 16571 | Asia_W_SW           | I6a        | I           | I            | 41             |
| 3581 | JQ705383.1           | JQ705383.1; H1u; Asia_W_Europe; 15; A263G; C309CCT; T310C          | 16568 | Asia_W_Europe       | H1u        | H           | H            | 15             |
| 3582 | JQ705384.1           | JQ705384.1; U2e1b1; Asia_S_W_Europe; 40; A73G; T152C; T217C        | 16571 | Asia_S_W_Europe     | U2e1b1     | U           | U2           | 40             |
| 3583 | JQ705385.1           | JQ705385.1; H2a1; Asia_W_Europe; 10; A263G; C309CCT; T310C         | 16570 | Asia_W_Europe       | H2a1       | H           | H            | 10             |
| 3584 | JQ705386.1           | JQ705386.1; U2e2a1c; Asia_S_W_Europe; 42; A73G; T152C; T217C       | 16570 | Asia_S_W_Europe     | U2e2a1c    | U           | U2           | 42             |
| 3585 | JQ705387.1           | JQ705387.1; U3a1; Africa_NE_Asia_W; 33; A73G; C150T; A263G         | 16570 | Africa_NE_Asia_W    | U3a1       | U           | U3           | 33             |
| 3586 | JQ705388.1           | JQ705388.1; J1c4; Asia_W; 32; A73G; G185A; G228A                   | 16570 | Asia_W              | J1c4       | J           | J            | 32             |
| 3587 | JQ705389.1           | JQ705389.1; X2m2; Asia_W_America_N; 33; A73G; G143A; T195C         | 16570 | Asia_W_America_N    | X2m2       | X           | X            | 33             |
| 3588 | JQ705390.1           | JQ705390.1; J2a1a1b; Asia_W; 40; A73G; C150T; T152C                | 16569 | Asia_W              | J2a1a1b    | J           | J            | 40             |
| 3589 | JQ705391.1           | JQ705391.1; H1y; Asia_W_Europe; 17; A73G; A263G; C315CC            | 16569 | Asia_W_Europe       | H1y        | H           | H            | 17             |
| 3590 | JQ705392.1           | JQ705392.1; H56; Asia_W_Europe; 11; A263G; C309CCCT; T310C         | 16571 | Asia_W_Europe       | H56        | H           | H            | 11             |
| 3591 | JQ705393.1           | JQ705393.1; K1a1a2a1; Asia_W; 37; A73G; A263G; C309CCT             | 16571 | Asia_W              | K1a1a2a1   | K           | K            | 37             |
| 3592 | JQ705394.1           | JQ705394.1; J1c7a; Asia_W; 35; A73G; T146C; G185A                  | 16569 | Asia_W              | J1c7a      | J           | J            | 35             |
| 3593 | JQ705395.1           | JQ705395.1; H1; Asia_W_Europe; 12; A263G; C309CCT; T310C           | 16570 | Asia_W_Europe       | H1         | H           | H            | 12             |
| 3594 | JQ705396.1           | JQ705396.1; V11; Europe_S; 19; T72C; A263G; C309CCCT               | 16571 | Europe_S            | V11        | V           | V            | 19             |
| 3595 | JQ705397.1           | JQ705397.1; J1c5b; Asia_W; 30; A73G; G185A; G228A                  | 16569 | Asia_W              | J1c5b      | J           | J            | 30             |
| 3596 | JQ705398.1           | JQ705398.1; U5a1b; Asia_W_Europe_C; 24; A73G; A263G; C315CC        | 16569 | Asia_W_Europe_C     | U5a1b      | U           | U5           | 24             |
| 3597 | JQ705399.1           | JQ705399.1; H13a1a1; Asia_W_Europe; 15; A263G; C309CCCT; T310C     | 16571 | Asia_W_Europe       | H13a1a1    | H           | H            | 15             |
| 3598 | JQ705400.1           | JQ705400.1; K1b1a1; Asia_W; 41; A73G; T152C; A263G                 | 16572 | Asia_W              | K1b1a1     | K           | K            | 41             |
| 3599 | JQ705401.1           | JQ705401.1; M20; Asia_S; 49; A73G; T152C; G225A                    | 16566 | Asia_S              | M20        | M           | M20          | 49             |
| 3600 | JQ705402.1           | JQ705402.1; H6a1a; Asia_W_Europe; 18; T152C; T239C; A263G          | 16569 | Asia_W_Europe       | H6a1a      | H           | H            | 18             |
| 3601 | JQ705403.1           | JQ705403.1; H83; Asia_W_Europe; 9; A263G; C315CC; A750G            | 16569 | Asia_W_Europe       | H83        | H           | H            | 9              |
| 3602 | JQ705404.1           | JQ705404.1; K1a4a1d; Asia_W; 36; A73G; A263G; C315CC               | 16569 | Asia_W              | K1a4a1d    | K           | K            | 36             |
| 3603 | JQ705405.1           | JQ705405.1; U5b1e1; Asia_W_Europe_C; 32; A73G; C150T; T152C        | 16567 | Asia_W_Europe_C     | U5b1e1     | U           | U5           | 32             |
| 3604 | JQ705406.1           | JQ705406.1; K1c1d; Asia_W; 39; A73G; T146C; T152C                  | 16566 | Asia_W              | K1c1d      | K           | K            | 39             |
| 3605 | JQ705407.1           | JQ705407.1; H66a; Asia_W_Europe; 10; A263G; C315CC; A750G          | 16569 | Asia_W_Europe       | H66a       | H           | H            | 10             |
| 3606 | JQ705408.1           | JQ705408.1; H2a2; Asia_W_Europe; 7; A263G; C309CCCT; T310C         | 16571 | Asia_W_Europe       | H2a2       | H           | H            | 7              |
| 3607 | JQ705409.1           | JQ705409.1; U4a1b1; Asia_N_Europe_N; 35; A73G; T152C; T195C        | 16570 | Asia_N_Europe_N     | U4a1b1     | U           | U4           | 35             |
| 3608 | JQ705410.1           | JQ705410.1; L3d2b; Africa_E; 34; A73G; C150T; T199C                | 16567 | Africa_E            | L3d2b      | L3          | L3           | 34             |



**Supplementary Table S3** Human mitochondrial database (hMITO DB v1.0) metadata

| Row  | Name (accession no.) | Description                                                    | Size  | Geo_Region          | Haplogroup | Macro_Haplo | Macro_Haplo2 | Total Variants |
|------|----------------------|----------------------------------------------------------------|-------|---------------------|------------|-------------|--------------|----------------|
| 3609 | JQ705411.1           | JQ705411.1; H2a1g; Asia_W_Europe; 9; A263G; C315CC; A750G      | 16569 | Asia_W_Europe       | H2a1g      | H           | H            | 9              |
| 3610 | JQ705412.1           | JQ705412.1; H5a1m; Asia_W_Europe; 16; T152C; A263G; C309CCT    | 16568 | Asia_W_Europe       | H5a1m      | H           | H            | 16             |
| 3611 | JQ705413.1           | JQ705413.1; H2a2b3; Asia_W_Europe; 8; A263G; C309CCT; T310C    | 16570 | Asia_W_Europe       | H2a2b3     | H           | H            | 8              |
| 3612 | JQ705414.1           | JQ705414.1; J1c4; Asia_W; 29; A73G; G228A; A263G               | 16569 | Asia_W              | J1c4       | J           | J            | 29             |
| 3613 | JQ705415.1           | JQ705415.1; H5a1g2; Asia_W_Europe; 15; A263G; C315CC; C456T    | 16567 | Asia_W_Europe       | H5a1g2     | H           | H            | 15             |
| 3614 | JQ705416.1           | JQ705416.1; HV17a; Asia_W; 17; T152C; T195C; A263G             | 16570 | Asia_W              | HV17a      | HV          | HV           | 17             |
| 3615 | JQ705417.1           | JQ705417.1; T2b3e; Asia_W; 38; A73G; A263G; C309CCT            | 16570 | Asia_W              | T2b3e      | T           | T            | 38             |
| 3616 | JQ705418.1           | JQ705418.1; U5b1b1f; Asia_W_Europe_C; 29; A73G; C150T; A263G   | 16569 | Asia_W_Europe_C     | U5b1b1f    | U           | U5           | 29             |
| 3617 | JQ705419.1           | JQ705419.1; U5b2a4a; Asia_W_Europe_C; 32; A73G; C150T; A263G   | 16569 | Asia_W_Europe_C     | U5b2a4a    | U           | U5           | 32             |
| 3618 | JQ705420.1           | JQ705420.1; H7a1b; Asia_W_Europe; 14; A263G; C309CCT; T310C    | 16570 | Asia_W_Europe       | H7a1b      | H           | H            | 14             |
| 3619 | JQ705421.1           | JQ705421.1; J1c2n1; Asia_W; 33; A73G; G185A; A188G             | 16571 | Asia_W              | J1c2n1     | J           | J            | 33             |
| 3620 | JQ705422.1           | JQ705422.1; H3aa; Asia_W_Europe; 12; A263G; C315CC; A750G      | 16569 | Asia_W_Europe       | H3aa       | H           | H            | 12             |
| 3621 | JQ705423.1           | JQ705423.1; H13a1a; Asia_W_Europe; 14; A263G; C309CCT; T310C   | 16570 | Asia_W_Europe       | H13a1a     | H           | H            | 14             |
| 3622 | JQ705424.1           | JQ705424.1; J1c14; Asia_W; 36; A73G; G185A; T195C              | 16572 | Asia_W              | J1c14      | J           | J            | 36             |
| 3623 | JQ705425.1           | JQ705425.1; H3c2; Asia_W_Europe; 16; T195C; A263G; C315CC      | 16569 | Asia_W_Europe       | H3c2       | H           | H            | 16             |
| 3624 | JQ705426.1           | JQ705426.1; H1e6; Asia_W_Europe; 15; T146C; A263G; C309CCT     | 16570 | Asia_W_Europe       | H1e6       | H           | H            | 15             |
| 3625 | JQ705427.1           | JQ705427.1; H1e1a; Asia_W_Europe; 14; T146C; A263G; C309CCT    | 16571 | Asia_W_Europe       | H1e1a      | H           | H            | 14             |
| 3626 | JQ705428.1           | JQ705428.1; U4a3a; Asia_N_Europe_N; 38; A73G; T195C; G247A     | 16573 | Asia_N_Europe_N     | U4a3a      | U           | U4           | 38             |
| 3627 | JQ705429.1           | JQ705429.1; U5b2; Asia_W_Europe_C; 30; A73G; C150T; T195C      | 16570 | Asia_W_Europe_C     | U5b2       | U           | U5           | 30             |
| 3628 | JQ705430.1           | JQ705430.1; U5a1a1; Asia_W_Europe_C; 31; A73G; A263G; C315CC   | 16569 | Asia_W_Europe_C     | U5a1a1     | U           | U5           | 31             |
| 3629 | JQ705431.1           | JQ705431.1; H5b; Asia_W_Europe; 14; T152C; A263G; C309CCT      | 16570 | Asia_W_Europe       | H5b        | H           | H            | 14             |
| 3630 | JQ705432.1           | JQ705432.1; T2b5a1; Asia_W; 37; A73G; A263G; C315CC            | 16571 | Asia_W              | T2b5a1     | T           | T            | 37             |
| 3631 | JQ705433.1           | JQ705433.1; K1a26; Asia_W; 35; A73G; T195C; A263G              | 16571 | Asia_W              | K1a26      | K           | K            | 35             |
| 3632 | JQ705434.1           | JQ705434.1; A2j; Asia_NE_America_N; 33; C64T; A73G; T146C      | 16567 | Asia_NE_America_N   | A2j        | A           | A            | 33             |
| 3633 | JQ705435.1           | JQ705435.1; H1af; Asia_W_Europe; 11; A263G; C315CC; A374G      | 16569 | Asia_W_Europe       | H1af       | H           | H            | 11             |
| 3634 | JQ705436.1           | JQ705436.1; H1ae; Asia_W_Europe; 15; A263G; C309CCT; T310C     | 16570 | Asia_W_Europe       | H1ae       | H           | H            | 15             |
| 3635 | JQ705437.1           | JQ705437.1; H3ai; Asia_W_Europe; 11; A263G; C315CC; A750G      | 16569 | Asia_W_Europe       | H3ai       | H           | H            | 11             |
| 3636 | JQ705438.1           | JQ705438.1; H5a7; Asia_W_Europe; 17; T152C; A263G; C309CCT     | 16570 | Asia_W_Europe       | H5a7       | H           | H            | 17             |
| 3637 | JQ705439.1           | JQ705439.1; J1c4c; Asia_W; 31; A73G; G185A; G228A              | 16570 | Asia_W              | J1c4c      | J           | J            | 31             |
| 3638 | JQ705440.1           | JQ705440.1; H6a1a9; Asia_W_Europe; 18; T239C; A263G; C309CCT   | 16570 | Asia_W_Europe       | H6a1a9     | H           | H            | 18             |
| 3639 | JQ705441.1           | JQ705441.1; T1a1i; Asia_W; 38; A73G; T152C; T195C              | 16572 | Asia_W              | T1a1i      | T           | T            | 38             |
| 3640 | JQ705442.1           | JQ705442.1; J1c2; Asia_W; 29; A73G; G185A; A188G               | 16569 | Asia_W              | J1c2       | J           | J            | 29             |
| 3641 | JQ705443.1           | JQ705443.1; H1b(H1b2); Asia_W_Europe; 2; C315CC; G8251A;       | 16569 | Asia_W_Europe       | H1b(H1b2)  | H           | H            | 2              |
| 3642 | JQ705444.1           | JQ705444.1; T2b27; Asia_W; 35; A73G; A263G; C315CC             | 16569 | Asia_W              | T2b27      | T           | T            | 35             |
| 3643 | JQ705445.1           | JQ705445.1; K1a; Asia_W; 35; A73G; A263G; C315CC               | 16571 | Asia_W              | K1a        | K           | K            | 35             |
| 3644 | JQ705446.1           | JQ705446.1; T2b; Asia_W; 34; A73G; A263G; C315CC               | 16569 | Asia_W              | T2b        | T           | T            | 34             |
| 3645 | JQ705447.1           | JQ705447.1; J1c3b1; Asia_W; 31; A73G; G185A; A263G             | 16570 | Asia_W              | J1c3b1     | J           | J            | 31             |
| 3646 | JQ705448.1           | JQ705448.1; H1; Asia_W_Europe; 13; T146C; A263G; C315CC        | 16569 | Asia_W_Europe       | H1         | H           | H            | 13             |
| 3647 | JQ705449.1           | JQ705449.1; J1c8b; Asia_W; 28; A73G; G185A; G228A              | 16569 | Asia_W              | J1c8b      | J           | J            | 28             |
| 3648 | JQ705450.1           | JQ705450.1; H76; Asia_W_Europe; 11; A263G; C309CCT; T310C      | 16570 | Asia_W_Europe       | H76        | H           | H            | 11             |
| 3649 | JQ705451.1           | JQ705451.1; C1b11; Asia_NE_America_N_S; 44; A73G; C194T; A249d | 16565 | Asia_NE_America_N_S | C1b11      | C           | C            | 44             |

**Supplementary Table S3** Human mitochondrial database (hMITO DB v1.0) metadata

| Row  | Name (accession no.) | Description                                                        | Size  | Geo_Region        | Haplogroup     | Macro_Haplo | Macro_Haplo2 | Total Variants |
|------|----------------------|--------------------------------------------------------------------|-------|-------------------|----------------|-------------|--------------|----------------|
| 3650 | JQ705452.1           | JQ705452.1; K2a; Asia_W; 32; A73G; T146C; T152C                    | 16569 | Asia_W            | K2a            | K           | K            | 32             |
| 3651 | JQ705453.1           | JQ705453.1; H5e1a; Asia_W_Europe; 15; T152C; A263G; C315CC         | 16573 | Asia_W_Europe     | H5e1a          | H           | H            | 15             |
| 3652 | JQ705454.1           | JQ705454.1; K1a1c; Asia_W; 36; A73G; C114T; A263G                  | 16569 | Asia_W            | K1a1c          | K           | K            | 36             |
| 3653 | JQ705455.1           | JQ705455.1; L2a1e1; Africa_W_C; 56; A73G; T146C; T152C             | 16569 | Africa_W_C        | L2a1e1         | L2          | L2           | 56             |
| 3654 | JQ705456.1           | JQ705456.1; K1a2a; Asia_W; 34; A73G; T195C; A263G                  | 16570 | Asia_W            | K1a2a          | K           | K            | 34             |
| 3655 | JQ705457.1           | JQ705457.1; E1a(E1a2a4); Asia_SE_Oceania; 3; T152C; C309CCT; T310C | 16570 | Asia_SE_Oceania   | E1a(E1a2a4)    | E           | E            | 3              |
| 3656 | JQ705458.1           | JQ705458.1; X2b4a1; Asia_W_America_N; 35; A73G; A153G; T195C       | 16570 | Asia_W_America_N  | X2b4a1         | X           | X            | 35             |
| 3657 | JQ705459.1           | JQ705459.1; H11a; Asia_W_Europe; 16; T195C; A263G; C309CCT         | 16570 | Asia_W_Europe     | H11a           | H           | H            | 16             |
| 3658 | JQ705460.1           | JQ705460.1; K1a27; Asia_W; 39; A73G; A263G; C309CCT                | 16576 | Asia_W            | K1a27          | K           | K            | 39             |
| 3659 | JQ705461.1           | JQ705461.1; M7b1a1+(16192); Asia_E_SE; 44; A73G; C150T; T199C      | 16570 | Asia_E_SE         | M7b1a1+(16192) | M           | M7           | 44             |
| 3660 | JQ705462.1           | JQ705462.1; H1e1a; Asia_W_Europe; 15; T195C; A263G; C315CC         | 16568 | Asia_W_Europe     | H1e1a          | H           | H            | 15             |
| 3661 | JQ705463.1           | JQ705463.1; T1a1; Asia_W; 35; A73G; T152C; T195C                   | 16569 | Asia_W            | T1a1           | T           | T            | 35             |
| 3662 | JQ705464.1           | JQ705464.1; HV0d; Asia_W; 18; T72C; T195C; A263G                   | 16568 | Asia_W            | HV0d           | HV          | HV           | 18             |
| 3663 | JQ705465.1           | JQ705465.1; T2e1a; Asia_W; 36; C41T; A73G; C150T                   | 16569 | Asia_W            | T2e1a          | T           | T            | 36             |
| 3664 | JQ705466.1           | JQ705466.1; J2b1a4; Asia_W; 35; A73G; C150T; T152C                 | 16570 | Asia_W            | J2b1a4         | J           | J            | 35             |
| 3665 | JQ705467.1           | JQ705467.1; K1b2a; Asia_W; 35; A73G; T146C; T195C                  | 16573 | Asia_W            | K1b2a          | K           | K            | 35             |
| 3666 | JQ705468.1           | JQ705468.1; H1c10; Asia_W_Europe; 13; A263G; C315CC; T477C         | 16569 | Asia_W_Europe     | H1c10          | H           | H            | 13             |
| 3667 | JQ705469.1           | JQ705469.1; K2b1a1; Asia_W; 39; A73G; T146C; A263G                 | 16569 | Asia_W            | K2b1a1         | K           | K            | 39             |
| 3668 | JQ705470.1           | JQ705470.1; J1c1b; Asia_W; 32; A73G; G185A; G228A                  | 16569 | Asia_W            | J1c1b          | J           | J            | 32             |
| 3669 | JQ705471.1           | JQ705471.1; H2a1c; Asia_W_Europe; 11; A263G; C309CCC; A750G        | 16570 | Asia_W_Europe     | H2a1c          | H           | H            | 11             |
| 3670 | JQ705472.1           | JQ705472.1; J1c3b1a; Asia_W; 33; A73G; G185A; A263G                | 16571 | Asia_W            | J1c3b1a        | J           | J            | 33             |
| 3671 | JQ705473.1           | JQ705473.1; U5b1c2b; Asia_W_Europe_C; 31; A73G; C150T; A263G       | 16569 | Asia_W_Europe_C   | U5b1c2b        | U           | U5           | 31             |
| 3672 | JQ705474.1           | JQ705474.1; X2b+226; Asia_W_America_N; 33; A73G; A153G; T195C      | 16571 | Asia_W_America_N  | X2b+226        | X           | X            | 33             |
| 3673 | JQ705475.1           | JQ705475.1; T2b; Asia_W; 35; A73G; A263G; C315CC                   | 16569 | Asia_W            | T2b            | T           | T            | 35             |
| 3674 | JQ705476.1           | JQ705476.1; K1a; Asia_W; 33; A73G; T146C; A263G                    | 16567 | Asia_W            | K1a            | K           | K            | 33             |
| 3675 | JQ705477.1           | JQ705477.1; V; Europe_S; 16; T72C; A263G; C309CCT                  | 16569 | Europe_S          | V              | V           | V            | 16             |
| 3676 | JQ705478.1           | JQ705478.1; L1b1a6; Africa_C; 81; A73G; T152C; C182T               | 16567 | Africa_C          | L1b1a6         | L1          | L1           | 81             |
| 3677 | JQ705479.1           | JQ705479.1; U5a1a1d; Asia_W_Europe_C; 32; A73G; G185A; T204C       | 16572 | Asia_W_Europe_C   | U5a1a1d        | U           | U5           | 32             |
| 3678 | JQ705480.1           | JQ705480.1; X2c1d; Asia_W_America_N; 30; A73G; A153G; T195C        | 16569 | Asia_W_America_N  | X2c1d          | X           | X            | 30             |
| 3679 | JQ705481.1           | JQ705481.1; K1c1; Asia_W; 33; A73G; T146C; A263G                   | 16568 | Asia_W            | K1c1           | K           | K            | 33             |
| 3680 | JQ705482.1           | JQ705482.1; H1b1c; Asia_W_Europe; 17; A263G; C315CC; C483T         | 16567 | Asia_W_Europe     | H1b1c          | H           | H            | 17             |
| 3681 | JQ705483.1           | JQ705483.1; K1a1a; Asia_W; 32; A73G; C114T; A263G                  | 16569 | Asia_W            | K1a1a          | K           | K            | 32             |
| 3682 | JQ705484.1           | JQ705484.1; T2b33; Asia_W; 41; A73G; C198T; A263G                  | 16570 | Asia_W            | T2b33          | T           | T            | 41             |
| 3683 | JQ705485.1           | JQ705485.1; K1a3a; Asia_W; 33; A73G; A263G; C315CC                 | 16569 | Asia_W            | K1a3a          | K           | K            | 33             |
| 3684 | JQ705486.1           | JQ705486.1; H24a2; Asia_W_Europe; 11; A263G; C315CC; G513A         | 16569 | Asia_W_Europe     | H24a2          | H           | H            | 11             |
| 3685 | JQ705487.1           | JQ705487.1; W3a2; Asia_W; 40; A73G; T152C; A189G                   | 16570 | Asia_W            | W3a2           | W           | W            | 40             |
| 3686 | JQ705488.1           | JQ705488.1; J1c5a1; Asia_W; 33; A73G; G185A; G228A                 | 16569 | Asia_W            | J1c5a1         | J           | J            | 33             |
| 3687 | JQ705489.1           | JQ705489.1; J1c+16261; Asia_W; 29; A73G; G185A; A263G              | 16570 | Asia_W            | J1c+16261      | J           | J            | 29             |
| 3688 | JQ705490.1           | JQ705490.1; H18; Asia_W_Europe; 14; C150T; A263G; C309CCCT         | 16571 | Asia_W_Europe     | H18            | H           | H            | 14             |
| 3689 | JQ705491.1           | JQ705491.1; A2+(64); Asia_NE_America_N; 37; C64T; A73G; G143A      | 16569 | Asia_NE_America_N | A2+(64)        | A           | A            | 37             |
| 3690 | JQ705492.1           | JQ705492.1; T2b13b; Asia_W; 39; A73G; A263G; C309CC                | 16570 | Asia_W            | T2b13b         | T           | T            | 39             |

**Supplementary Table S3** Human mitochondrial database (hMITO DB v1.0) metadata

| Row  | Name (accession no.) | Description                                                     | Size  | Geo_Region        | Haplogroup | Macro_Haplo | Macro_Haplo2 | Total Variants |
|------|----------------------|-----------------------------------------------------------------|-------|-------------------|------------|-------------|--------------|----------------|
| 3691 | JQ705493.1           | JQ705493.1; H1m; Asia_W_Europe; 13; C150T; A263G; C315CC        | 16569 | Asia_W_Europe     | H1m        | H           | H            | 13             |
| 3692 | JQ705494.1           | JQ705494.1; T2b6a; Asia_W; 39; A73G; A263G; C309CCT             | 16570 | Asia_W            | T2b6a      | T           | T            | 39             |
| 3693 | JQ705495.1           | JQ705495.1; H1c11; Asia_W_Europe; 11; A263G; C315CC; T477C      | 16569 | Asia_W_Europe     | H1c11      | H           | H            | 11             |
| 3694 | JQ705496.1           | JQ705496.1; H1e1a2; Asia_W_Europe; 17; A263G; C309CCT; T310C    | 16570 | Asia_W_Europe     | H1e1a2     | H           | H            | 17             |
| 3695 | JQ705497.1           | JQ705497.1; T1a1; Asia_W; 39; A73G; T152C; T195C                | 16570 | Asia_W            | T1a1       | T           | T            | 39             |
| 3696 | JQ705498.1           | JQ705498.1; U5a1d2a1; Asia_W_Europe_C; 36; A73G; T195C; A263G   | 16572 | Asia_W_Europe_C   | U5a1d2a1   | U           | U5           | 36             |
| 3697 | JQ705499.1           | JQ705499.1; T2a1a5; Asia_W; 35; A73G; A263G; C315CC             | 16569 | Asia_W            | T2a1a5     | T           | T            | 35             |
| 3698 | JQ705500.1           | JQ705500.1; U5b2c2; Asia_W_Europe_C; 33; A73G; C150T; T152C     | 16571 | Asia_W_Europe_C   | U5b2c2     | U           | U5           | 33             |
| 3699 | JQ705501.1           | JQ705501.1; A2v1b; Asia_NE_America_N; 36; C64T; A73G; T146C     | 16569 | Asia_NE_America_N | A2v1b      | A           | A            | 36             |
| 3700 | JQ705502.1           | JQ705502.1; U5b2a1b; Asia_W_Europe_C; 30; A73G; C150T; T152C    | 16569 | Asia_W_Europe_C   | U5b2a1b    | U           | U5           | 30             |
| 3701 | JQ705503.1           | JQ705503.1; M7a1a; Asia_E_SE; 41; A73G; A263G; C309CCT          | 16569 | Asia_E_SE         | M7a1a      | M           | M7           | 41             |
| 3702 | JQ705504.1           | JQ705504.1; H3+152; Asia_W_Europe; 12; T152C; A263G; C309CCCT   | 16571 | Asia_W_Europe     | H3+152     | H           | H            | 12             |
| 3703 | JQ705505.1           | JQ705505.1; H3v; Asia_W_Europe; 11; A263G; C309CCCT; T310C      | 16571 | Asia_W_Europe     | H3v        | H           | H            | 11             |
| 3704 | JQ705506.1           | JQ705506.1; V12; Europe_S; 16; T72C; A263G; C309CCT             | 16570 | Europe_S          | V12        | V           | V            | 16             |
| 3705 | JQ705507.1           | JQ705507.1; H5a1; Asia_W_Europe; 14; A263G; C309CCCT; T310C     | 16569 | Asia_W_Europe     | H5a1       | H           | H            | 14             |
| 3706 | JQ705508.1           | JQ705508.1; H13a1a; Asia_W_Europe; 14; A263G; C309CCCT; T310C   | 16571 | Asia_W_Europe     | H13a1a     | H           | H            | 14             |
| 3707 | JQ705509.1           | JQ705509.1; X2b5; Asia_W_America_N; 33; A73G; A153G; T195C      | 16569 | Asia_W_America_N  | X2b5       | X           | X            | 33             |
| 3708 | JQ705510.1           | JQ705510.1; H2a2a1; Asia_W_Europe; 5; T152C; A200G; C309CCT     | 16570 | Asia_W_Europe     | H2a2a1     | H           | H            | 5              |
| 3709 | JQ705511.1           | JQ705511.1; H5b1; Asia_W_Europe; 15; T146C; T195C; A263G        | 16570 | Asia_W_Europe     | H5b1       | H           | H            | 15             |
| 3710 | JQ705512.1           | JQ705512.1; J2a1a1c; Asia_W; 41; A73G; C150T; T152C             | 16570 | Asia_W            | J2a1a1c    | J           | J            | 41             |
| 3711 | JQ705513.1           | JQ705513.1; V2a1a; Europe_S; 21; T72C; A263G; C309CCT           | 16570 | Europe_S          | V2a1a      | V           | V            | 21             |
| 3712 | JQ705514.1           | JQ705514.1; I4a; Asia_W_SW; 34; A73G; T199C; T204C              | 16572 | Asia_W_SW         | I4a        | I           | I            | 34             |
| 3713 | JQ705515.1           | JQ705515.1; U1a1b; Asia_W; 38; A73G; T152C; A263G               | 16571 | Asia_W            | U1a1b      | U           | U1           | 38             |
| 3714 | JQ705516.1           | JQ705516.1; H1c4; Asia_W_Europe; 11; A263G; C315CC; T477C       | 16569 | Asia_W_Europe     | H1c4       | H           | H            | 11             |
| 3715 | JQ705517.1           | JQ705517.1; H49a1; Asia_W_Europe; 13; A263G; C309CCT; T310C     | 16572 | Asia_W_Europe     | H49a1      | H           | H            | 13             |
| 3716 | JQ705518.1           | JQ705518.1; HV+16311; Asia_W_Europe; 14; A263G; C309CCCT; T310C | 16571 | Asia_W_Europe     | HV+16311   | H           | H            | 14             |
| 3717 | JQ705519.1           | JQ705519.1; K1b2a1a1; Asia_W; 37; A73G; T146C; T195C            | 16573 | Asia_W            | K1b2a1a1   | K           | K            | 37             |
| 3718 | JQ705520.1           | JQ705520.1; K1c1; Asia_W; 32; A73G; T146C; T152C                | 16568 | Asia_W            | K1c1       | K           | K            | 32             |
| 3719 | JQ705521.1           | JQ705521.1; L3e1f2; Africa_E; 37; A73G; C150T; A189G            | 16560 | Africa_E          | L3e1f2     | L3          | L3           | 37             |
| 3720 | JQ705522.1           | JQ705522.1; N1a1a1a2; Africa_NE_Asia_W; 38; A73G; T152C; T199C  | 16571 | Africa_NE_Asia_W  | N1a1a1a2   | N           | N1           | 38             |
| 3721 | JQ705523.1           | JQ705523.1; K1a11; Asia_W; 35; A16T; A73G; C150T                | 16560 | Asia_W            | K1a11      | K           | K            | 35             |
| 3722 | JQ705524.1           | JQ705524.1; H13a2b3; Asia_W_Europe; 16; A73G; G143A; A263G      | 16571 | Asia_W_Europe     | H13a2b3    | H           | H            | 16             |
| 3723 | JQ705525.1           | JQ705525.1; X4; Asia_W_America_N; 33; A73G; T146C; T152C        | 16570 | Asia_W_America_N  | X4         | X           | X            | 33             |
| 3724 | JQ705526.1           | JQ705526.1; HV1c; Asia_W; 19; T65C; G207A; A263G                | 16570 | Asia_W            | HV1c       | HV          | HV           | 19             |
| 3725 | JQ705527.1           | JQ705527.1; N1a1a1a2; Africa_NE_Asia_W; 41; A73G; T152C; T199C  | 16571 | Africa_NE_Asia_W  | N1a1a1a2   | N           | N1           | 41             |
| 3726 | JQ705528.1           | JQ705528.1; T2f4; Asia_W; 36; A73G; A263G; C309CCCT             | 16562 | Asia_W            | T2f4       | T           | T            | 36             |
| 3727 | JQ705529.1           | JQ705529.1; L2a1a3a; Africa_W_C; 60; A73G; G143A; T146C         | 16572 | Africa_W_C        | L2a1a3a    | L2          | L2           | 60             |
| 3728 | JQ705530.1           | JQ705530.1; U5a2a2; Asia_W_Europe_C; 27; A73G; C151T; A263G     | 16569 | Asia_W_Europe_C   | U5a2a2     | U           | U5           | 27             |
| 3729 | JQ705531.1           | JQ705531.1; H7; Asia_W_Europe; 13; A263G; C309CCT; T310C        | 16570 | Asia_W_Europe     | H7         | H           | H            | 13             |
| 3730 | JQ705532.1           | JQ705532.1; H2a2b; Asia_W_Europe; 10; A263G; C309CCT; T310C     | 16570 | Asia_W_Europe     | H2a2b      | H           | H            | 10             |
| 3731 | JQ705533.1           | JQ705533.1; H1a3b1; Asia_W_Europe; 17; A73G; A263G; C315CC      | 16567 | Asia_W_Europe     | H1a3b1     | H           | H            | 17             |

**Supplementary Table S3** Human mitochondrial database (hMITO DB v1.0) metadata

| Row  | Name (accession no.) | Description                                                    | Size  | Geo_Region            | Haplogroup | Macro_Haplo | Macro_Haplo2 | Total Variants |
|------|----------------------|----------------------------------------------------------------|-------|-----------------------|------------|-------------|--------------|----------------|
| 3732 | JQ705534.1           | JQ705534.1; A2h1; Asia_NE_America_N; 34; C64T; A73G; T146C     | 16566 | Asia_NE_America_N     | A2h1       | A           | A            | 34             |
| 3733 | JQ705535.1           | JQ705535.1; J2a1a1a2; Asia_W; 40; A73G; C150T; T152C           | 16570 | Asia_W                | J2a1a1a2   | J           | J            | 40             |
| 3734 | JQ705536.1           | JQ705536.1; W5a1a; Asia_W; 41; A73G; G143A; A189G              | 16570 | Asia_W                | W5a1a      | W           | W            | 41             |
| 3735 | JQ705537.1           | JQ705537.1; K1a13a; Asia_W; 36; A73G; T146C; T195C             | 16572 | Asia_W                | K1a13a     | K           | K            | 36             |
| 3736 | JQ705538.1           | JQ705538.1; K1e; Asia_W; 39; A73G; T152C; A263G                | 16572 | Asia_W                | K1e        | K           | K            | 39             |
| 3737 | JQ705539.1           | JQ705539.1; H15a1; Asia_W_Europe; 13; T55C; T57C; A263G        | 16570 | Asia_W_Europe         | H15a1      | H           | H            | 13             |
| 3738 | JQ705540.1           | JQ705540.1; HV1b2; Asia_W; 22; T152C; A263G; C309CCCT          | 16571 | Asia_W                | HV1b2      | HV          | HV           | 22             |
| 3739 | JQ705541.1           | JQ705541.1; B2; Asia_SE_E_America_N_S; 38; T63C; C64T; A73G    | 16570 | Asia_SE_E_America_N_S | B2         | B           | B            | 38             |
| 3740 | JQ705542.1           | JQ705542.1; T1a1i; Asia_W; 40; A73G; T152C; A183G              | 16572 | Asia_W                | T1a1i      | T           | T            | 40             |
| 3741 | JQ705543.1           | JQ705543.1; K1a4a1; Asia_W; 38; A73G; A189G; A263G             | 16572 | Asia_W                | K1a4a1     | K           | K            | 38             |
| 3742 | JQ705544.1           | JQ705544.1; HV0; Asia_W; 21; T72C; C150T; C186T                | 16570 | Asia_W                | HV0        | HV          | HV           | 21             |
| 3743 | JQ705545.1           | JQ705545.1; H3g1b; Asia_W_Europe; 15; T152C; A263G; C315CC     | 16569 | Asia_W_Europe         | H3g1b      | H           | H            | 15             |
| 3744 | JQ705546.1           | JQ705546.1; H33; Asia_W_Europe; 11; A263G; C309CCT; T310C      | 16570 | Asia_W_Europe         | H33        | H           | H            | 11             |
| 3745 | JQ705547.1           | JQ705547.1; U4a1a; Asia_N_Europe_N; 33; A73G; T152C; T195C     | 16569 | Asia_N_Europe_N       | U4a1a      | U           | U4           | 33             |
| 3746 | JQ705548.1           | JQ705548.1; H3n; Asia_W_Europe; 14; A263G; C315CC; A750G       | 16569 | Asia_W_Europe         | H3n        | H           | H            | 14             |
| 3747 | JQ705549.1           | JQ705549.1; H1ba; Asia_W_Europe; 12; A263G; C309CCT; T310C     | 16570 | Asia_W_Europe         | H1ba       | H           | H            | 12             |
| 3748 | JQ705550.1           | JQ705550.1; X2b12; Asia_W_America_N; 34; A73G; A153G; T195C    | 16570 | Asia_W_America_N      | X2b12      | X           | X            | 34             |
| 3749 | JQ705551.1           | JQ705551.1; H6a1b2; Asia_W_Europe; 20; G207A; T239C; A263G     | 16570 | Asia_W_Europe         | H6a1b2     | H           | H            | 20             |
| 3750 | JQ705552.1           | JQ705552.1; N1b1a2a; Africa_NE_Asia_W; 41; A73G; T152C; A200G  | 16572 | Africa_NE_Asia_W      | N1b1a2a    | N           | N1           | 41             |
| 3751 | JQ705553.1           | JQ705553.1; U4a1a; Asia_N_Europe_N; 33; A73G; T152C; T195C     | 16571 | Asia_N_Europe_N       | U4a1a      | U           | U4           | 33             |
| 3752 | JQ705554.1           | JQ705554.1; H41a; Asia_W_Europe; 16; C262T; A263G; C309CCT     | 16570 | Asia_W_Europe         | H41a       | H           | H            | 16             |
| 3753 | JQ705555.1           | JQ705555.1; H1e1a; Asia_W_Europe; 15; A263G; C309CCT; T310C    | 16570 | Asia_W_Europe         | H1e1a      | H           | H            | 15             |
| 3754 | JQ705556.1           | JQ705556.1; K1a4a1a2a; Asia_W; 40; A73G; A263G; C309CCT        | 16576 | Asia_W                | K1a4a1a2a  | K           | K            | 40             |
| 3755 | JQ705557.1           | JQ705557.1; A2q1; Asia_NE_America_N; 42; C64T; A73G; G94A      | 16568 | Asia_NE_America_N     | A2q1       | A           | A            | 42             |
| 3756 | JQ705558.1           | JQ705558.1; K1a4a1d; Asia_W; 36; A73G; A263G; C309CCT          | 16570 | Asia_W                | K1a4a1d    | K           | K            | 36             |
| 3757 | JQ705559.1           | JQ705559.1; U2e1a1; Asia_S_W_Europe; 42; A73G; T152C; T217C    | 16572 | Asia_S_W_Europe       | U2e1a1     | U           | U2           | 42             |
| 3758 | JQ705560.1           | JQ705560.1; U4b1b1; Asia_N_Europe_N; 35; A73G; T146C; T152C    | 16575 | Asia_N_Europe_N       | U4b1b1     | U           | U4           | 35             |
| 3759 | JQ705561.1           | JQ705561.1; R1a1a; Asia_S_SE; 33; A73G; A263G; C295A           | 16570 | Asia_S_SE             | R1a1a      | R           | R1           | 33             |
| 3760 | JQ705562.1           | JQ705562.1; J1c1b; Asia_W; 36; A73G; G185A; G228A              | 16570 | Asia_W                | J1c1b      | J           | J            | 36             |
| 3761 | JQ705563.1           | JQ705563.1; H2a2b1; Asia_W_Europe; 9; A263G; C309CCCT; T310C   | 16571 | Asia_W_Europe         | H2a2b1     | H           | H            | 9              |
| 3762 | JQ705564.1           | JQ705564.1; H10e; Asia_W_Europe; 12; A263G; C309CCT; T310C     | 16570 | Asia_W_Europe         | H10e       | H           | H            | 12             |
| 3763 | JQ705565.1           | JQ705565.1; HV0; Asia_W; 16; T72C; A263G; C309CCT              | 16570 | Asia_W                | HV0        | HV          | HV           | 16             |
| 3764 | JQ705566.1           | JQ705566.1; U4a2a2; Asia_N_Europe_N; 28; A73G; T195C; A263G    | 16570 | Asia_N_Europe_N       | U4a2a2     | U           | U4           | 28             |
| 3765 | JQ705567.1           | JQ705567.1; HV0a1; Asia_W; 16; A263G; C309CCCT; T310C          | 16569 | Asia_W                | HV0a1      | HV          | HV           | 16             |
| 3766 | JQ705568.1           | JQ705568.1; K1a1b1a; Asia_W; 36; A73G; C114T; A263G            | 16569 | Asia_W                | K1a1b1a    | K           | K            | 36             |
| 3767 | JQ705569.1           | JQ705569.1; H5c1a; Asia_W_Europe; 12; A263G; C315CC; C456T     | 16569 | Asia_W_Europe         | H5c1a      | H           | H            | 12             |
| 3768 | JQ705570.1           | JQ705570.1; C1b5b; Asia_NE_America_N_S; 47; A73G; A249d; G255A | 16564 | Asia_NE_America_N_S   | C1b5b      | C           | C            | 47             |
| 3769 | JQ705571.1           | JQ705571.1; T2c1e; Asia_W; 44; A73G; T146C; C150T              | 16568 | Asia_W                | T2c1e      | T           | T            | 44             |
| 3770 | JQ705572.1           | JQ705572.1; F1f; Asia_SE_E; 32; A73G; A249d; A263G             | 16566 | Asia_SE_E             | F1f        | F           | F            | 32             |
| 3771 | JQ705573.1           | JQ705573.1; U5a1c1a; Asia_W_Europe_C; 29; A73G; A153G; T195C   | 16569 | Asia_W_Europe_C       | U5a1c1a    | U           | U5           | 29             |
| 3772 | JQ705574.1           | JQ705574.1; C1c6; Asia_NE_America_N_S; 46; A73G; T195C; A249d  | 16567 | Asia_NE_America_N_S   | C1c6       | C           | C            | 46             |

**Supplementary Table S3** Human mitochondrial database (hMITO DB v1.0) metadata

| Row  | Name (accession no.) | Description                                                         | Size  | Geo_Region            | Haplogroup | Macro_Haplo | Macro_Haplo2 | Total Variants |
|------|----------------------|---------------------------------------------------------------------|-------|-----------------------|------------|-------------|--------------|----------------|
| 3773 | JQ705575.1           | JQ705575.1; J2a1a1; Asia_W; 38; A73G; C150T; T195C                  | 16570 | Asia_W                | J2a1a1     | J           | J            | 38             |
| 3774 | JQ705576.1           | JQ705576.1; L1c2b1c; Africa_C; 95; A73G; T152C; C182T               | 16568 | Africa_C              | L1c2b1c    | L1          | L1           | 95             |
| 3775 | JQ705577.1           | JQ705577.1; U5b2b3; Asia_W_Europe_C; 37; A73G; T146C; C150T         | 16570 | Asia_W_Europe_C       | U5b2b3     | U           | U5           | 37             |
| 3776 | JQ705578.1           | JQ705578.1; H2a2a1; Asia_N_Europe_N; 3; C309CCCT; T310C; A14375G    | 16571 | Asia_N_Europe_N       | H2a2a1     | U           | U4           | 3              |
| 3777 | JQ705579.1           | JQ705579.1; H1bm; Asia_W_Europe; 11; A263G; C309CCT; T310C          | 16570 | Asia_W_Europe         | H1bm       | H           | H            | 11             |
| 3778 | JQ705580.1           | JQ705580.1; H11a2a; Asia_W_Europe; 16; T195C; A263G; C315CC         | 16569 | Asia_W_Europe         | H11a2a     | H           | H            | 16             |
| 3779 | JQ705581.1           | JQ705581.1; J1c5; Asia_W; 32; A73G; G185A; G228A                    | 16573 | Asia_W                | J1c5       | J           | J            | 32             |
| 3780 | JQ705582.1           | JQ705582.1; H5a2a; Asia_W_Europe; 14; A263G; C309CCCT; T310C        | 16571 | Asia_W_Europe         | H5a2a      | H           | H            | 14             |
| 3781 | JQ705583.1           | JQ705583.1; H60a; Asia_W_Europe; 13; G185A; A263G; C315CC           | 16569 | Asia_W_Europe         | H60a       | H           | H            | 13             |
| 3782 | JQ705584.1           | JQ705584.1; H1at1a; Asia_W_Europe; 14; A263G; C315CC; A750G         | 16569 | Asia_W_Europe         | H1at1a     | H           | H            | 14             |
| 3783 | JQ705585.1           | JQ705585.1; C1b4; Asia_NE_America_N_S; 47; A73G; G143A; T152C       | 16565 | Asia_NE_America_N_S   | C1b4       | C           | C            | 47             |
| 3784 | JQ705586.1           | JQ705586.1; H1e1a; Asia_W_Europe; 13; A263G; C309CCT; T310C         | 16570 | Asia_W_Europe         | H1e1a      | H           | H            | 13             |
| 3785 | JQ705587.1           | JQ705587.1; L1b1a15a; Africa_C; 85; A73G; T146C; T152C              | 16567 | Africa_C              | L1b1a15a   | L1          | L1           | 85             |
| 3786 | JQ705588.1           | JQ705588.1; J1b1a1d; Asia_W; 40; A73G; G185A; C242T                 | 16569 | Asia_W                | J1b1a1d    | J           | J            | 40             |
| 3787 | JQ705589.1           | JQ705589.1; L2a1l2a1; Africa_W_C; 56; A73G; T146C; T152C            | 16570 | Africa_W_C            | L2a1l2a1   | L2          | L2           | 56             |
| 3788 | JQ705590.1           | JQ705590.1; N1b1b1; Africa_NE_Asia_W; 40; A73G; T152C; A263G        | 16570 | Africa_NE_Asia_W      | N1b1b1     | N           | N1           | 40             |
| 3789 | JQ705591.1           | JQ705591.1; U4a1a; Asia_N_Europe_N; 33; A73G; T152C; T195C          | 16572 | Asia_N_Europe_N       | U4a1a      | U           | U4           | 33             |
| 3790 | JQ705592.1           | JQ705592.1; H6a2; Asia_W_Europe; 14; T239C; A263G; C315CC           | 16569 | Asia_W_Europe         | H6a2       | H           | H            | 14             |
| 3791 | JQ705593.1           | JQ705593.1; J1c2h; Asia_W; 31; A73G; G185A; A188G                   | 16570 | Asia_W                | J1c2h      | J           | J            | 31             |
| 3792 | JQ705594.1           | JQ705594.1; H7; Asia_W_Europe; 10; A263G; C315CC; A750G             | 16569 | Asia_W_Europe         | H7         | H           | H            | 10             |
| 3793 | JQ705595.1           | JQ705595.1; l1a1b; Asia_W_SW; 42; A73G; T199C; G203A                | 16572 | Asia_W_SW             | l1a1b      | I           | I            | 42             |
| 3794 | JQ705596.1           | JQ705596.1; L3e5b; Africa_E; 30; A73G; C150T; C315CC                | 16567 | Africa_E              | L3e5b      | L3          | L3           | 30             |
| 3795 | JQ705597.1           | JQ705597.1; L1c2b1c; Africa_C; 97; A73G; T152C; C182T               | 16568 | Africa_C              | L1c2b1c    | L1          | L1           | 97             |
| 3796 | JQ705598.1           | JQ705598.1; B2a1b; Asia_SE_E_America_N_S; 34; A73G; A263G; C315CC   | 16560 | Asia_SE_E_America_N_S | B2a1b      | B           | B            | 34             |
| 3797 | JQ705599.1           | JQ705599.1; HV0; Asia_W; 14; T72C; A263G; C309CCCT                  | 16571 | Asia_W                | HV0        | HV          | HV           | 14             |
| 3798 | JQ705600.1           | JQ705600.1; T2b4a; Asia_W; 37; A73G; A263G; C309CCT                 | 16570 | Asia_W                | T2b4a      | T           | T            | 37             |
| 3799 | JQ705601.1           | JQ705601.1; U1a1a3; Asia_W; 42; A73G; T152C; T195C                  | 16570 | Asia_W                | U1a1a3     | U           | U1           | 42             |
| 3800 | JQ705602.1           | JQ705602.1; U2e1a1; Asia_S_W_Europe; 44; A73G; T152C; T217C         | 16572 | Asia_S_W_Europe       | U2e1a1     | U           | U2           | 44             |
| 3801 | JQ705603.1           | JQ705603.1; H6a1b; Asia_W_Europe; 16; T152C; T239C; A263G           | 16571 | Asia_W_Europe         | H6a1b      | H           | H            | 16             |
| 3802 | JQ705604.1           | JQ705604.1; V8; Europe_S; 17; T72C; A263G; C309CCT                  | 16570 | Europe_S              | V8         | V           | V            | 17             |
| 3803 | JQ705605.1           | JQ705605.1; W3b; Asia_W; 40; A73G; A189G; C194T                     | 16570 | Asia_W                | W3b        | W           | W            | 40             |
| 3804 | JQ705606.1           | JQ705606.1; L1b1a18; Africa_C; 81; A73G; T152C; G185T               | 16568 | Africa_C              | L1b1a18    | L1          | L1           | 81             |
| 3805 | JQ705607.1           | JQ705607.1; H1f1a; Asia_W_Europe; 16; A263G; C315CC; C459d(=C456d+) | 16568 | Asia_W_Europe         | H1f1a      | H           | H            | 16             |
| 3806 | JQ705608.1           | JQ705608.1; U5b1e1; Asia_W_Europe_C; 32; A73G; C150T; T152C         | 16567 | Asia_W_Europe_C       | U5b1e1     | U           | U5           | 32             |
| 3807 | JQ705609.1           | JQ705609.1; U4a2; Asia_N_Europe_N; 32; A73G; T195C; A263G           | 16572 | Asia_N_Europe_N       | U4a2       | U           | U4           | 32             |
| 3808 | JQ705610.1           | JQ705610.1; V+@72; Europe_S; 15; A263G; C309CCCT; T310C             | 16571 | Europe_S              | V+@72      | V           | V            | 15             |
| 3809 | JQ705611.1           | JQ705611.1; K2a; Asia_W; 34; A73G; T146C; T152C                     | 16569 | Asia_W                | K2a        | K           | K            | 34             |
| 3810 | JQ705612.1           | JQ705612.1; X2c1c; Asia_W_America_N; 32; A73G; A153G; T195C         | 16570 | Asia_W_America_N      | X2c1c      | X           | X            | 32             |
| 3811 | JQ705613.1           | JQ705613.1; U5b1b1a; Asia_W_Europe_C; 31; A73G; C150T; A263G        | 16570 | Asia_W_Europe_C       | U5b1b1a    | U           | U5           | 31             |
| 3812 | JQ705614.1           | JQ705614.1; V; Europe_S; 17; T72C; A263G; C309CCT                   | 16570 | Europe_S              | V          | V           | V            | 17             |
| 3813 | JQ705615.1           | JQ705615.1; H1g1; Asia_W_Europe; 14; A263G; C309CCCT; T310C         | 16571 | Asia_W_Europe         | H1g1       | H           | H            | 14             |

**Supplementary Table S3** Human mitochondrial database (hMITO DB v1.0) metadata

| Row  | Name (accession no.) | Description                                                       | Size  | Geo_Region            | Haplogroup | Macro_Haplo | Macro_Haplo2 | Total Variants |
|------|----------------------|-------------------------------------------------------------------|-------|-----------------------|------------|-------------|--------------|----------------|
| 3814 | JQ705616.1           | JQ705616.1; H7e; Asia_W_Europe; 13; A263G; C309CCCT; T310C        | 16571 | Asia_W_Europe         | H7e        | H           | H            | 13             |
| 3815 | JQ705617.1           | JQ705617.1; U5a1a1; Asia_W_Europe_C; 28; A73G; A263G; C315CC      | 16569 | Asia_W_Europe_C       | U5a1a1     | U           | U5           | 28             |
| 3816 | JQ705618.1           | JQ705618.1; H1h1; Asia_W_Europe; 16; T152C; A263G; C309CCCT       | 16570 | Asia_W_Europe         | H1h1       | H           | H            | 16             |
| 3817 | JQ705619.1           | JQ705619.1; M7c1c3; Asia_E_SE; 39; A73G; T146C; T199C             | 16567 | Asia_E_SE             | M7c1c3     | M           | M7           | 39             |
| 3818 | JQ705620.1           | JQ705620.1; K1a2a; Asia_W; 34; A73G; A263G; C309CCCT              | 16570 | Asia_W                | K1a2a      | K           | K            | 34             |
| 3819 | JQ705621.1           | JQ705621.1; U5a1a1e; Asia_W_Europe_C; 26; A73G; A263G; C315CC     | 16569 | Asia_W_Europe_C       | U5a1a1e    | U           | U5           | 26             |
| 3820 | JQ705622.1           | JQ705622.1; H1c3; Asia_W_Europe; 16; T195C; A257G; A263G          | 16569 | Asia_W_Europe         | H1c3       | H           | H            | 16             |
| 3821 | JQ705623.1           | JQ705623.1; J2b1; Asia_W; 35; A73G; C150T; T152C                  | 16571 | Asia_W                | J2b1       | J           | J            | 35             |
| 3822 | JQ705624.1           | JQ705624.1; H59a; Asia_W_Europe; 12; A263G; C315CC; A750G         | 16569 | Asia_W_Europe         | H59a       | H           | H            | 12             |
| 3823 | JQ705625.1           | JQ705625.1; J2a1a1a2; Asia_W; 43; A73G; C150T; T152C              | 16570 | Asia_W                | J2a1a1a2   | J           | J            | 43             |
| 3824 | JQ705626.1           | JQ705626.1; L2c; Africa_W_C; 60; A73G; A93G; T146C                | 16568 | Africa_W_C            | L2c        | L2          | L2           | 60             |
| 3825 | JQ705627.1           | JQ705627.1; U5a2c4; Asia_W_Europe_C; 26; A73G; T146C; A263G       | 16569 | Asia_W_Europe_C       | U5a2c4     | U           | U5           | 26             |
| 3826 | JQ705628.1           | JQ705628.1; K1a1b1a; Asia_W; 38; A73G; C114T; A189G               | 16569 | Asia_W                | K1a1b1a    | K           | K            | 38             |
| 3827 | JQ705629.1           | JQ705629.1; K1a4d; Asia_W; 36; A73G; T195C; A263G                 | 16571 | Asia_W                | K1a4d      | K           | K            | 36             |
| 3828 | JQ705630.1           | JQ705630.1; T1a1c; Asia_W; 38; A73G; T152C; T195C                 | 16570 | Asia_W                | T1a1c      | T           | T            | 38             |
| 3829 | JQ705631.1           | JQ705631.1; J2a1a1a2; Asia_W; 41; A73G; C150T; T152C              | 16570 | Asia_W                | J2a1a1a2   | J           | J            | 41             |
| 3830 | JQ705632.1           | JQ705632.1; J2a1a1a2; Asia_W; 41; A73G; C150T; T152C              | 16570 | Asia_W                | J2a1a1a2   | J           | J            | 41             |
| 3831 | JQ705633.1           | JQ705633.1; J1c4c; Asia_W; 31; A73G; G185A; G228A                 | 16569 | Asia_W                | J1c4c      | J           | J            | 31             |
| 3832 | JQ705634.1           | JQ705634.1; H82; Asia_W_Europe; 12; T195C; A263G; C315CC          | 16567 | Asia_W_Europe         | H82        | H           | H            | 12             |
| 3833 | JQ705635.1           | JQ705635.1; J1c3f; Asia_W; 32; A73G; G228A; A263G                 | 16570 | Asia_W                | J1c3f      | J           | J            | 32             |
| 3834 | JQ705636.1           | JQ705636.1; J1c3b; Asia_W; 29; A73G; G185A; A263G                 | 16571 | Asia_W                | J1c3b      | J           | J            | 29             |
| 3835 | JQ705637.1           | JQ705637.1; F1b1a1a2; Asia_SE_E; 45; A73G; T152C; A249d           | 16568 | Asia_SE_E             | F1b1a1a2   | F           | F            | 45             |
| 3836 | JQ705638.1           | JQ705638.1; V3c; Europe_S; 19; T72C; A263G; C309CCCT              | 16571 | Europe_S              | V3c        | V           | V            | 19             |
| 3837 | JQ705639.1           | JQ705639.1; T2f3; Asia_W; 34; A73G; A263G; C309CCCT               | 16562 | Asia_W                | T2f3       | T           | T            | 34             |
| 3838 | JQ705640.1           | JQ705640.1; H16b; Asia_W_Europe; 12; A263G; C315CC; A750G         | 16569 | Asia_W_Europe         | H16b       | H           | H            | 12             |
| 3839 | JQ705641.1           | JQ705641.1; T2a1b1a; Asia_W; 40; A73G; T131C; A263G               | 16570 | Asia_W                | T2a1b1a    | T           | T            | 40             |
| 3840 | JQ705642.1           | JQ705642.1; W3a1a2; Asia_W; 39; A73G; A189G; C194T                | 16569 | Asia_W                | W3a1a2     | W           | W            | 39             |
| 3841 | JQ705643.1           | JQ705643.1; H11a8; Asia_W_Europe; 15; T195C; A263G; C309CCCT      | 16570 | Asia_W_Europe         | H11a8      | H           | H            | 15             |
| 3842 | JQ705644.1           | JQ705644.1; T2f1a1; Asia_W; 41; A73G; T195C; A263G                | 16560 | Asia_W                | T2f1a1     | T           | T            | 41             |
| 3843 | JQ705645.1           | JQ705645.1; I1a1; Asia_W_SW; 43; A73G; T199C; G203A               | 16573 | Asia_W_SW             | I1a1       | I           | I            | 43             |
| 3844 | JQ705646.1           | JQ705646.1; K1a2a; Asia_W; 35; A73G; A263G; C309CCCT              | 16572 | Asia_W                | K1a2a      | K           | K            | 35             |
| 3845 | JQ705647.1           | JQ705647.1; T2b21; Asia_W; 34; A73G; T195C; A263G                 | 16569 | Asia_W                | T2b21      | T           | T            | 34             |
| 3846 | JQ705648.1           | JQ705648.1; B2t; Asia_SE_E_America_N_S; 37; A73G; A263G; C309CCCT | 16561 | Asia_SE_E_America_N_S | B2t        | B           | B            | 37             |
| 3847 | JQ705649.1           | JQ705649.1; H1; Asia_W_Europe; 14; A263G; C309CCCT; T310C         | 16570 | Asia_W_Europe         | H1         | H           | H            | 14             |
| 3848 | JQ705650.1           | JQ705650.1; L1c2b1b1; Africa_C; 96; A73G; C151T; T152C            | 16569 | Africa_C              | L1c2b1b1   | L1          | L1           | 96             |
| 3849 | JQ705651.1           | JQ705651.1; U2e2a1c; Asia_S_W_Europe; 41; A73G; T152C; T217C      | 16571 | Asia_S_W_Europe       | U2e2a1c    | U           | U2           | 41             |
| 3850 | JQ705652.1           | JQ705652.1; H4a1a4b; Asia_W_Europe; 20; T195C; A263G; C315CC      | 16567 | Asia_W_Europe         | H4a1a4b    | H           | H            | 20             |
| 3851 | JQ705653.1           | JQ705653.1; U8a1a1; Asia_W_Europe ; 32; A73G; A263G; T282C        | 16570 | Asia_W_Europe         | U8a1a1     | U           | U8           | 32             |
| 3852 | JQ705654.1           | JQ705654.1; H1a1; Asia_W_Europe; 14; A73G; A263G; C309CCCT        | 16570 | Asia_W_Europe         | H1a1       | H           | H            | 14             |
| 3853 | JQ705655.1           | JQ705655.1; U4a2; Asia_N_Europe_N; 30; A73G; T195C; A263G         | 16572 | Asia_N_Europe_N       | U4a2       | U           | U4           | 30             |
| 3854 | JQ705656.1           | JQ705656.1; K1a4g; Asia_W; 38; A73G; A263G; C264T                 | 16570 | Asia_W                | K1a4g      | K           | K            | 38             |

**Supplementary Table S3** Human mitochondrial database (hMITO DB v1.0) metadata

| Row  | Name (accession no.) | Description                                                        | Size  | Geo_Region          | Haplogroup    | Macro_Haplo | Macro_Haplo2 | Total Variants |
|------|----------------------|--------------------------------------------------------------------|-------|---------------------|---------------|-------------|--------------|----------------|
| 3855 | JQ705657.1           | JQ705657.1; H1+16239; Asia_W_Europe; 14; A263G; C309CCT; T310C     | 16570 | Asia_W_Europe       | H1+16239      | H           | H            | 14             |
| 3856 | JQ705658.1           | JQ705658.1; V2; Europe_S; 17; T72C; A263G; C309CCT                 | 16570 | Europe_S            | V2            | V           | V            | 17             |
| 3857 | JQ705659.1           | JQ705659.1; H6a1b2e; Asia_W_Europe; 19; T239C; A263G; C309CCCT     | 16571 | Asia_W_Europe       | H6a1b2e       | H           | H            | 19             |
| 3858 | JQ705660.1           | JQ705660.1; H6a1a8a; Asia_W_Europe; 19; T239C; A263G; C309CCT      | 16570 | Asia_W_Europe       | H6a1a8a       | H           | H            | 19             |
| 3859 | JQ705661.1           | JQ705661.1; K1a4a1; Asia_W; 35; A73G; A263G; C309CCT               | 16572 | Asia_W              | K1a4a1        | K           | K            | 35             |
| 3860 | JQ705662.1           | JQ705662.1; M18b; Africa_E; 34; A73G; T199C; T246C                 | 16569 | Africa_E            | M18b          | M           | M18          | 34             |
| 3861 | JQ705663.1           | JQ705663.1; T1a1; Asia_W; 37; A73G; T152C; T195C                   | 16570 | Asia_W              | T1a1          | T           | T            | 37             |
| 3862 | JQ705664.1           | JQ705664.1; T2b19; Asia_W; 35; A73G; A263G; C315CC                 | 16567 | Asia_W              | T2b19         | T           | T            | 35             |
| 3863 | JQ705665.1           | JQ705665.1; C1b; Asia_NE_America_N_S; 43; A73G; A249d; A263G       | 16563 | Asia_NE_America_N_S | C1b           | C           | C            | 43             |
| 3864 | JQ705666.1           | JQ705666.1; I2c; Asia_W_SW; 37; A73G; T152C; T199C                 | 16571 | Asia_W_SW           | I2c           | I           | I            | 37             |
| 3865 | JQ705667.1           | JQ705667.1; U2e2a1a2; Asia_S_W_Europe; 42; A73G; T152C; A263G      | 16571 | Asia_S_W_Europe     | U2e2a1a2      | U           | U2           | 42             |
| 3866 | JQ705668.1           | JQ705668.1; T2c1d1a; Asia_W; 40; A73G; T146C; A263G                | 16570 | Asia_W              | T2c1d1a       | T           | T            | 40             |
| 3867 | JQ705669.1           | JQ705669.1; L1b1a3a; Africa_C; 83; A73G; T152C; C182T              | 16568 | Africa_C            | L1b1a3a       | L1          | L1           | 83             |
| 3868 | JQ705670.1           | JQ705670.1; H10e; Asia_W_Europe; 12; A263G; C309CCT; T310C         | 16570 | Asia_W_Europe       | H10e          | H           | H            | 12             |
| 3869 | JQ705671.1           | JQ705671.1; X2b+226; Asia_W_America_N; 33; A73G; A153G; T195C      | 16571 | Asia_W_America_N    | X2b+226       | X           | X            | 33             |
| 3870 | JQ705672.1           | JQ705672.1; U2e2a1a; Asia_S_W_Europe; 41; A73G; T152C; T217C       | 16570 | Asia_S_W_Europe     | U2e2a1a       | U           | U2           | 41             |
| 3871 | JQ705673.1           | JQ705673.1; T2e; Asia_W; 37; A73G; C150T; A263G                    | 16571 | Asia_W              | T2e           | T           | T            | 37             |
| 3872 | JQ705674.1           | JQ705674.1; H27a; Asia_W_Europe; 14; A263G; C315CC; A750G          | 16569 | Asia_W_Europe       | H27a          | H           | H            | 14             |
| 3873 | JQ705675.1           | JQ705675.1; U5b1b1+@16192; Asia_W_Europe_C; 31; A73G; C150T; A263G | 16571 | Asia_W_Europe_C     | U5b1b1+@16192 | U           | U5           | 31             |
| 3874 | JQ705676.1           | JQ705676.1; C1c1b; Asia_NE_America_N_S; 43; A73G; A215G; A249d     | 16566 | Asia_NE_America_N_S | C1c1b         | C           | C            | 43             |
| 3875 | JQ705677.1           | JQ705677.1; J2b1a2; Asia_W; 36; A73G; C150T; T152C                 | 16570 | Asia_W              | J2b1a2        | J           | J            | 36             |
| 3876 | JQ705678.1           | JQ705678.1; H1cc; Asia_W_Europe; 14; T72C; A263G; C309CCCT         | 16571 | Asia_W_Europe       | H1cc          | H           | H            | 14             |
| 3877 | JQ705679.1           | JQ705679.1; H7a1c; Asia_W_Europe; 14; A263G; C315CC; A750G         | 16569 | Asia_W_Europe       | H7a1c         | H           | H            | 14             |
| 3878 | JQ705680.1           | JQ705680.1; T2b19b; Asia_W; 40; A73G; A263G; C309CCT               | 16568 | Asia_W              | T2b19b        | T           | T            | 40             |
| 3879 | JQ705681.1           | JQ705681.1; H1o; Asia_W_Europe; 16; C150T; A263G; C315CC           | 16569 | Asia_W_Europe       | H1o           | H           | H            | 16             |
| 3880 | JQ705682.1           | JQ705682.1; H80; Asia_W_Europe; 11; A263G; C315CC; A750G           | 16559 | Asia_W_Europe       | H80           | H           | H            | 11             |
| 3881 | JQ705683.1           | JQ705683.1; J1c14; Asia_W; 35; A73G; G185A; T195C                  | 16569 | Asia_W              | J1c14         | J           | J            | 35             |
| 3882 | JQ705684.1           | JQ705684.1; H27a; Asia_W_Europe; 16; T152C; A263G; C315CC          | 16569 | Asia_W_Europe       | H27a          | H           | H            | 16             |
| 3883 | JQ705685.1           | JQ705685.1; K1b1a1a; Asia_W; 43; A73G; T152C; T199C                | 16570 | Asia_W              | K1b1a1a       | K           | K            | 43             |
| 3884 | JQ705686.1           | JQ705686.1; K1b1a1; Asia_W; 45; A73G; T152C; A263G                 | 16572 | Asia_W              | K1b1a1        | K           | K            | 45             |
| 3885 | JQ705687.1           | JQ705687.1; U4a1a2; Asia_N_Europe_N; 38; A73G; T152C; T195C        | 16571 | Asia_N_Europe_N     | U4a1a2        | U           | U4           | 38             |
| 3886 | JQ705688.1           | JQ705688.1; U5b2a2c; Asia_W_Europe_C; 33; A73G; GGAGCA106-; C150T  | 16563 | Asia_W_Europe_C     | U5b2a2c       | U           | U5           | 33             |
| 3887 | JQ705689.1           | JQ705689.1; K1a26; Asia_W; 33; A73G; T195C; A263G                  | 16569 | Asia_W              | K1a26         | K           | K            | 33             |
| 3888 | JQ705690.1           | JQ705690.1; T2k; Asia_W; 38; A73G; A263G; C309CCCT                 | 16571 | Asia_W              | T2k           | T           | T            | 38             |
| 3889 | JQ705691.1           | JQ705691.1; H; Asia_W_Europe; 13; A200G; A263G; C309CCT            | 16568 | Asia_W_Europe       | H             | H           | H            | 13             |
| 3890 | JQ705692.1           | JQ705692.1; H44b; Asia_W_Europe; 14; C150T; T195C; A263G           | 16571 | Asia_W_Europe       | H44b          | H           | H            | 14             |
| 3891 | JQ705693.1           | JQ705693.1; U5a1b1d1; Asia_W_Europe_C; 29; A73G; C198T; A263G      | 16569 | Asia_W_Europe_C     | U5a1b1d1      | U           | U5           | 29             |
| 3892 | JQ705694.1           | JQ705694.1; H3g1a; Asia_W_Europe; 16; C151T; T152C; A263G          | 16569 | Asia_W_Europe       | H3g1a         | H           | H            | 16             |
| 3893 | JQ705695.1           | JQ705695.1; H1c; Asia_W_Europe; 13; T146C; A263G; C315CC           | 16570 | Asia_W_Europe       | H1c           | H           | H            | 13             |
| 3894 | JQ705696.1           | JQ705696.1; U5a2b1a; Asia_W_Europe_C; 28; A73G; A263G; C315CC      | 16570 | Asia_W_Europe_C     | U5a2b1a       | U           | U5           | 28             |
| 3895 | JQ705697.1           | JQ705697.1; K1a1c; Asia_W; 39; A73G; C114T; A263G                  | 16569 | Asia_W              | K1a1c         | K           | K            | 39             |

**Supplementary Table S3** Human mitochondrial database (hMITO DB v1.0) metadata

| Row  | Name (accession no.) | Description                                                             | Size  | Geo_Region            | Haplogroup   | Macro_ Haplo | Macro_ Haplo2 | Total Variants |
|------|----------------------|-------------------------------------------------------------------------|-------|-----------------------|--------------|--------------|---------------|----------------|
| 3896 | JQ705698.1           | JQ705698.1; H3g1; Asia_W_Europe; 16; T152C; A263G; C309CCT              | 16570 | Asia_W_Europe         | H3g1         | H            | H             | 16             |
| 3897 | JQ705699.1           | JQ705699.1; H13a2b2a; Asia_W_Europe; 17; A263G; C309CCT; T310C          | 16570 | Asia_W_Europe         | H13a2b2a     | H            | H             | 17             |
| 3898 | JQ705700.1           | JQ705700.1; B4a1a1+16126; Asia_SE_E_America_N_S; 31; A73G; T146C; A263G | 16557 | Asia_SE_E_America_N_S | B4a1a1+16126 | B            | B             | 31             |
| 3899 | JQ705701.1           | JQ705701.1; J1c3d; Asia_W; 28; A73G; G185A; A263G                       | 16569 | Asia_W                | J1c3d        | J            | J             | 28             |
| 3900 | JQ705702.1           | JQ705702.1; H10e; Asia_W_Europe; 14; A263G; C309CCT; T310C              | 16570 | Asia_W_Europe         | H10e         | H            | H             | 14             |
| 3901 | JQ705703.1           | JQ705703.1; H4a1a3a; Asia_W_Europe; 19; T195C; A263G; C315CC            | 16567 | Asia_W_Europe         | H4a1a3a      | H            | H             | 19             |
| 3902 | JQ705704.1           | JQ705704.1; U1b1; Asia_W; 36; A73G; T146C; A263G                        | 16569 | Asia_W                | U1b1         | U            | U1            | 36             |
| 3903 | JQ705705.1           | JQ705705.1; K1a; Asia_W; 32; A73G; A263G; C309CCT                       | 16576 | Asia_W                | K1a          | K            | K             | 32             |
| 3904 | JQ705706.1           | JQ705706.1; H1c3; Asia_W_Europe; 15; G185A; T195C; A257G                | 16570 | Asia_W_Europe         | H1c3         | H            | H             | 15             |
| 3905 | JQ705707.1           | JQ705707.1; T1a1k1; Asia_W; 40; A73G; T146C; T152C                      | 16570 | Asia_W                | T1a1k1       | T            | T             | 40             |
| 3906 | JQ705708.1           | JQ705708.1; H3; Asia_W_Europe; 11; A263G; C309CCT; T310C                | 16570 | Asia_W_Europe         | H3           | H            | H             | 11             |
| 3907 | JQ705709.1           | JQ705709.1; H1b1e; Asia_W_Europe; 14; A263G; C315CC; A750G              | 16569 | Asia_W_Europe         | H1b1e        | H            | H             | 14             |
| 3908 | JQ705710.1           | JQ705710.1; H39b; Asia_W_Europe; 13; A263G; C309CCCT; T310C             | 16571 | Asia_W_Europe         | H39b         | H            | H             | 13             |
| 3909 | JQ705711.1           | JQ705711.1; U2e1a1; Asia_S_W_Europe; 44; A73G; T152C; T217C             | 16573 | Asia_S_W_Europe       | U2e1a1       | U            | U2            | 44             |
| 3910 | JQ705712.1           | JQ705712.1; H1c; Asia_W_Europe; 11; A263G; C309CCCT; T310C              | 16571 | Asia_W_Europe         | H1c          | H            | H             | 11             |
| 3911 | JQ705713.1           | JQ705713.1; T1a; Asia_W; 35; A73G; A263G; C309CCT                       | 16570 | Asia_W                | T1a          | T            | T             | 35             |
| 3912 | JQ705714.1           | JQ705714.1; K1a4a1a2; Asia_W; 39; A73G; T146C; A263G                    | 16572 | Asia_W                | K1a4a1a2     | K            | K             | 39             |
| 3913 | JQ705715.1           | JQ705715.1; J1c2f; Asia_W; 31; A73G; G185A; A188G                       | 16569 | Asia_W                | J1c2f        | J            | J             | 31             |
| 3914 | JQ705716.1           | JQ705716.1; H1q1; Asia_W_Europe; 13; A263G; C309CCT; T310C              | 16570 | Asia_W_Europe         | H1q1         | H            | H             | 13             |
| 3915 | JQ705717.1           | JQ705717.1; H1e2; Asia_W_Europe; 13; C150T; A263G; C315CC               | 16569 | Asia_W_Europe         | H1e2         | H            | H             | 13             |
| 3916 | JQ705718.1           | JQ705718.1; H10a1; Asia_W_Europe; 13; A263G; C309CCT; T310C             | 16570 | Asia_W_Europe         | H10a1        | H            | H             | 13             |
| 3917 | JQ705719.1           | JQ705719.1; H6a1b4; Asia_W_Europe; 19; T63C; C64T; G66A                 | 16569 | Asia_W_Europe         | H6a1b4       | H            | H             | 19             |
| 3918 | JQ705720.1           | JQ705720.1; W7; Asia_W; 37; A73G; T119C; G185A                          | 16570 | Asia_W                | W7           | W            | W             | 37             |
| 3919 | JQ705721.1           | JQ705721.1; H7b1; Asia_W_Europe; 16; T152C; A263G; C315CC               | 16569 | Asia_W_Europe         | H7b1         | H            | H             | 16             |
| 3920 | JQ705722.1           | JQ705722.1; H1c; Asia_W_Europe; 11; T146C; A263G; C315CC                | 16569 | Asia_W_Europe         | H1c          | H            | H             | 11             |
| 3921 | JQ705723.1           | JQ705723.1; H15b1; Asia_W_Europe; 15; T55C; T57G; A93G                  | 16569 | Asia_W_Europe         | H15b1        | H            | H             | 15             |
| 3922 | JQ705724.1           | JQ705724.1; J1c2; Asia_W; 31; A73G; G185A; A188G                        | 16569 | Asia_W                | J1c2         | J            | J             | 31             |
| 3923 | JQ705725.1           | JQ705725.1; H3c1; Asia_W_Europe; 14; A189G; A263G; C315CC               | 16569 | Asia_W_Europe         | H3c1         | H            | H             | 14             |
| 3924 | JQ705726.1           | JQ705726.1; H13a1a5; Asia_W_Europe; 15; C182T; A263G; C309CCT           | 16570 | Asia_W_Europe         | H13a1a5      | H            | H             | 15             |
| 3925 | JQ705727.1           | JQ705727.1; H3b4a; Asia_W_Europe; 15; A263G; C309CCT; T310C             | 16570 | Asia_W_Europe         | H3b4a        | H            | H             | 15             |
| 3926 | JQ705728.1           | JQ705728.1; H27f; Asia_W_Europe; 13; A263G; C315CC; A750G               | 16569 | Asia_W_Europe         | H27f         | H            | H             | 13             |
| 3927 | JQ705729.1           | JQ705729.1; U4a1b1; Asia_N_Europe_N; 34; A73G; T152C; T195C             | 16569 | Asia_N_Europe_N       | U4a1b1       | U            | U4            | 34             |
| 3928 | JQ705730.1           | JQ705730.1; H6a1a3; Asia_W_Europe; 17; T239C; A263G; C309CCCT           | 16571 | Asia_W_Europe         | H6a1a3       | H            | H             | 17             |
| 3929 | JQ705731.1           | JQ705731.1; K1a+195; Asia_W; 35; A73G; C140T; T195C                     | 16569 | Asia_W                | K1a+195      | K            | K             | 35             |
| 3930 | JQ705732.1           | JQ705732.1; L1b1a3; Africa_C; 82; A73G; T152C; C182T                    | 16568 | Africa_C              | L1b1a3       | L1           | L1            | 82             |
| 3931 | JQ705733.1           | JQ705733.1; K1a+195; Asia_W; 36; A73G; T195C; A263G                     | 16572 | Asia_W                | K1a+195      | K            | K             | 36             |
| 3932 | JQ705734.1           | JQ705734.1; H2a2b4; Asia_W_Europe; 8; A263G; C309CCT; T310C             | 16570 | Asia_W_Europe         | H2a2b4       | H            | H             | 8              |
| 3933 | JQ705735.1           | JQ705735.1; H3b6; Asia_W_Europe; 16; A73G; A263G; C309CCT               | 16570 | Asia_W_Europe         | H3b6         | H            | H             | 16             |
| 3934 | JQ705736.1           | JQ705736.1; K1b2a2; Asia_W; 38; A73G; T146C; T152C                      | 16574 | Asia_W                | K1b2a2       | K            | K             | 38             |
| 3935 | JQ705737.1           | JQ705737.1; U5a1d2b; Asia_W_Europe_C; 36; A73G; T146C; A257G            | 16572 | Asia_W_Europe_C       | U5a1d2b      | U            | U5            | 36             |
| 3936 | JQ705738.1           | JQ705738.1; H4a1a4b; Asia_W_Europe; 20; A93G; T195C; A263G              | 16567 | Asia_W_Europe         | H4a1a4b      | H            | H             | 20             |



**Supplementary Table S3** Human mitochondrial database (hMITO DB v1.0) metadata

| Row  | Name (accession no.) | Description                                                    | Size  | Geo_Region            | Haplogroup | Macro_Haplo | Macro_Haplo2 | Total Variants |
|------|----------------------|----------------------------------------------------------------|-------|-----------------------|------------|-------------|--------------|----------------|
| 3937 | JQ705739.1           | JQ705739.1; U3a1c1; Africa_NE_Asia_W; 31; A73G; C150T; A263G   | 16569 | Africa_NE_Asia_W      | U3a1c1     | U           | U3           | 31             |
| 3938 | JQ705740.1           | JQ705740.1; H11a6; Asia_W_Europe; 18; T195C; A263G; C309CCT    | 16571 | Asia_W_Europe         | H11a6      | H           | H            | 18             |
| 3939 | JQ705741.1           | JQ705741.1; V; Europe_S; 17; C64T; T72C; A263G                 | 16571 | Europe_S              | V          | V           | V            | 17             |
| 3940 | JQ705742.1           | JQ705742.1; U5b1e1; Asia_W_Europe_C; 30; A73G; C150T; T152C    | 16567 | Asia_W_Europe_C       | U5b1e1     | U           | U5           | 30             |
| 3941 | JQ705743.1           | JQ705743.1; HV10; Asia_W; 14; A200G; A263G; C309CCT            | 16579 | Asia_W                | HV10       | HV          | HV           | 14             |
| 3942 | JQ705744.1           | JQ705744.1; N1b1a; Africa_NE_Asia_W; 37; A73G; T152C; A263G    | 16569 | Africa_NE_Asia_W      | N1b1a      | N           | N1           | 37             |
| 3943 | JQ705745.1           | JQ705745.1; K1a1b1a; Asia_W; 38; A73G; C114T; A263G            | 16569 | Asia_W                | K1a1b1a    | K           | K            | 38             |
| 3944 | JQ705746.1           | JQ705746.1; A2an; Asia_NE_America_N; 36; C64T; A73G; T146C     | 16571 | Asia_NE_America_N     | A2an       | A           | A            | 36             |
| 3945 | JQ705747.1           | JQ705747.1; K1a11; Asia_W; 36; A16T; A73G; C150T               | 16562 | Asia_W                | K1a11      | K           | K            | 36             |
| 3946 | JQ705748.1           | JQ705748.1; H5c; Asia_W_Europe; 14; A263G; C315CC; C456T       | 16567 | Asia_W_Europe         | H5c        | H           | H            | 14             |
| 3947 | JQ705749.1           | JQ705749.1; V19; Europe_S; 16; T72C; A263G; C309CCT            | 16570 | Europe_S              | V19        | V           | V            | 16             |
| 3948 | JQ705750.1           | JQ705750.1; K1a; Asia_W; 36; A73G; A263G; C315CC               | 16571 | Asia_W                | K1a        | K           | K            | 36             |
| 3949 | JQ705751.1           | JQ705751.1; K1a30; Asia_W; 35; A73G; C150T; A263G              | 16570 | Asia_W                | K1a30      | K           | K            | 35             |
| 3950 | JQ705752.1           | JQ705752.1; N3a; Africa_NE_Europe_E; 39; A73G; T146C; A210G    | 16570 | Africa_NE_Europe_E    | N3a        | N           | N3           | 39             |
| 3951 | JQ705753.1           | JQ705753.1; L3b1a; Africa_E; 38; A73G; A263G; C315CC           | 16566 | Africa_E              | L3b1a      | L3          | L3           | 38             |
| 3952 | JQ705754.1           | JQ705754.1; H1bk; Asia_W_Europe; 12; A95C; A263G; C315CC       | 16567 | Asia_W_Europe         | H1bk       | H           | H            | 12             |
| 3953 | JQ705755.1           | JQ705755.1; B2w; Asia_SE_E_America_N_S; 33; A73G; T146C; A263G | 16562 | Asia_SE_E_America_N_S | B2w        | B           | B            | 33             |
| 3954 | JQ705756.1           | JQ705756.1; H1; Asia_W_Europe; 9; A263G; C315CC; A750G         | 16569 | Asia_W_Europe         | H1         | H           | H            | 9              |
| 3955 | JQ705757.1           | JQ705757.1; H1c18; Asia_W_Europe; 12; A263G; C315CC; T477C     | 16569 | Asia_W_Europe         | H1c18      | H           | H            | 12             |
| 3956 | JQ705758.1           | JQ705758.1; T2b; Asia_W; 37; A73G; A263G; C309CCT              | 16570 | Asia_W                | T2b        | T           | T            | 37             |
| 3957 | JQ705759.1           | JQ705759.1; H3u1; Asia_W_Europe; 15; C151T; A263G; C315CC      | 16570 | Asia_W_Europe         | H3u1       | H           | H            | 15             |
| 3958 | JQ705760.1           | JQ705760.1; J1c8a1a; Asia_W; 32; A73G; G185A; G228A            | 16570 | Asia_W                | J1c8a1a    | J           | J            | 32             |
| 3959 | JQ705761.1           | JQ705761.1; C1c3; Asia_NE_America_N_S; 47; A73G; A249d; A263G  | 16567 | Asia_NE_America_N_S   | C1c3       | C           | C            | 47             |
| 3960 | JQ705762.1           | JQ705762.1; H5a1; Asia_W_Europe; 13; A263G; C315CC; C456T      | 16567 | Asia_W_Europe         | H5a1       | H           | H            | 13             |
| 3961 | JQ705763.1           | JQ705763.1; H1a1; Asia_W_Europe; 14; A73G; A263G; C309CCT      | 16570 | Asia_W_Europe         | H1a1       | H           | H            | 14             |
| 3962 | JQ705764.1           | JQ705764.1; H1a1; Asia_W_Europe; 14; A73G; A263G; C315CC       | 16569 | Asia_W_Europe         | H1a1       | H           | H            | 14             |
| 3963 | JQ705765.1           | JQ705765.1; W3b1; Asia_W; 35; A73G; T195C; T199C               | 16570 | Asia_W                | W3b1       | W           | W            | 35             |
| 3964 | JQ705766.1           | JQ705766.1; H1c3; Asia_W_Europe; 17; T195C; A257G; A263G       | 16571 | Asia_W_Europe         | H1c3       | H           | H            | 17             |
| 3965 | JQ705767.1           | JQ705767.1; H5a1a; Asia_W_Europe; 16; A263G; C309CCT; T310C    | 16568 | Asia_W_Europe         | H5a1a      | H           | H            | 16             |
| 3966 | JQ705768.1           | JQ705768.1; N9a3; Africa_NE_Asia_E; 29; A73G; C150T; A263G     | 16571 | Africa_NE_Asia_E      | N9a3       | N           | N9           | 29             |
| 3967 | JQ705769.1           | JQ705769.1; H4a1a1a1a1; Asia_W_Europe; 23; A73G; T152C; A263G  | 16567 | Asia_W_Europe         | H4a1a1a1a1 | H           | H            | 23             |
| 3968 | JQ705770.1           | JQ705770.1; J1c1f; Asia_W; 34; A73G; G185A; G228A              | 16569 | Asia_W                | J1c1f      | J           | J            | 34             |
| 3969 | JQ705771.1           | JQ705771.1; K1b2b; Asia_W; 41; A73G; T146C; T195C              | 16571 | Asia_W                | K1b2b      | K           | K            | 41             |
| 3970 | JQ705772.1           | JQ705772.1; K1c1e; Asia_W; 36; A73G; T146C; T152C              | 16568 | Asia_W                | K1c1e      | K           | K            | 36             |
| 3971 | JQ705773.1           | JQ705773.1; K1a1; Asia_W; 34; A73G; C114T; A263G               | 16569 | Asia_W                | K1a1       | K           | K            | 34             |
| 3972 | JQ705774.1           | JQ705774.1; J2a1a1e; Asia_W; 44; C44CC; A73G; C150T            | 16572 | Asia_W                | J2a1a1e    | J           | J            | 44             |
| 3973 | JQ705775.1           | JQ705775.1; K1a4d; Asia_W; 37; A73G; A263G; C309CCT            | 16572 | Asia_W                | K1a4d      | K           | K            | 37             |
| 3974 | JQ705776.1           | JQ705776.1; K1a+195; Asia_W; 34; A73G; T195C; A263G            | 16569 | Asia_W                | K1a+195    | K           | K            | 34             |
| 3975 | JQ705777.1           | JQ705777.1; U5a1a2b; Asia_W_Europe_C; 27; A73G; A263G; C309CCT | 16572 | Asia_W_Europe_C       | U5a1a2b    | U           | U5           | 27             |
| 3976 | JQ705778.1           | JQ705778.1; T1a1; Asia_W; 36; A73G; T152C; A183G               | 16569 | Asia_W                | T1a1       | T           | T            | 36             |
| 3977 | JQ705779.1           | JQ705779.1; U5a2c4; Asia_W_Europe_C; 25; A73G; A263G; C315CC   | 16569 | Asia_W_Europe_C       | U5a2c4     | U           | U5           | 25             |

**Supplementary Table S3** Human mitochondrial database (hMITO DB v1.0) metadata

| Row  | Name (accession no.) | Description                                                       | Size  | Geo_Region           | Haplogroup | Macro_Haplo | Macro_Haplo2 | Total Variants |
|------|----------------------|-------------------------------------------------------------------|-------|----------------------|------------|-------------|--------------|----------------|
| 3978 | JQ705780.1           | JQ705780.1; H13a1a; Asia_W_Europe; 13; A263G; C309CCCT; T310C     | 16571 | Asia_W_Europe        | H13a1a     | H           | H            | 13             |
| 3979 | JQ705781.1           | JQ705781.1; K1c1b; Asia_W; 35; A73G; T146C; T152C                 | 16568 | Asia_W               | K1c1b      | K           | K            | 35             |
| 3980 | JQ705782.1           | JQ705782.1; C5c1a; Asia_NE_America_N_S; 48; A73G; T152C; A249d    | 16569 | Asia_NE_America_N_S  | C5c1a      | C           | C            | 48             |
| 3981 | JQ705783.1           | JQ705783.1; L3b1a1; Africa_E; 40; A73G; A263G; C315CC             | 16566 | Africa_E             | L3b1a1     | L3          | L3           | 40             |
| 3982 | JQ705784.1           | JQ705784.1; K1a3; Asia_W; 33; A73G; A263G; C315CC                 | 16569 | Asia_W               | K1a3       | K           | K            | 33             |
| 3983 | JQ705785.1           | JQ705785.1; K1a4a1; Asia_W; 37; A73G; A263G; C315CC               | 16569 | Asia_W               | K1a4a1     | K           | K            | 37             |
| 3984 | JQ705786.1           | JQ705786.1; T2b3c; Asia_W; 38; A73G; C151T; A263G                 | 16570 | Asia_W               | T2b3c      | T           | T            | 38             |
| 3985 | JQ705787.1           | JQ705787.1; H5a1i; Asia_W_Europe; 17; T42TG; T199C; A263G         | 16568 | Asia_W_Europe        | H5a1i      | H           | H            | 17             |
| 3986 | JQ705788.1           | JQ705788.1; X2c1a; Asia_W_America_N; 30; A73G; A153G; T195C       | 16569 | Asia_W_America_N     | X2c1a      | X           | X            | 30             |
| 3987 | JQ705789.1           | JQ705789.1; V3a; Europe_S; 17; T72C; T195C; A263G                 | 16570 | Europe_S             | V3a        | V           | V            | 17             |
| 3988 | JQ705790.1           | JQ705790.1; H5a1c2; Asia_W_Europe; 18; A263G; C315CC; C456T       | 16567 | Asia_W_Europe        | H5a1c2     | H           | H            | 18             |
| 3989 | JQ705791.1           | JQ705791.1; V5; Europe_S; 17; T72C; A93G; A263G                   | 16570 | Europe_S             | V5         | V           | V            | 17             |
| 3990 | JQ705792.1           | JQ705792.1; J1b1a1+146; Asia_W; 39; A73G; T146C; C242T            | 16570 | Asia_W               | J1b1a1+146 | J           | J            | 39             |
| 3991 | JQ705793.1           | JQ705793.1; W6; Asia_W; 39; A73G; A189G; C194T                    | 16570 | Asia_W               | W6         | W           | W            | 39             |
| 3992 | JQ705794.1           | JQ705794.1; X2b+226; Asia_W_America_N; 29; A73G; A153G; T195C     | 16569 | Asia_W_America_N     | X2b+226    | X           | X            | 29             |
| 3993 | JQ705795.1           | JQ705795.1; X2d; Asia_W_America_N; 32; A73G; T152C; T195C         | 16569 | Asia_W_America_N     | X2d        | X           | X            | 32             |
| 3994 | JQ705796.1           | JQ705796.1; H13a1a1a; Asia_W_Europe; 21; A263G; C309CCCT; T310C   | 16570 | Asia_W_Europe        | H13a1a1a   | H           | H            | 21             |
| 3995 | JQ705797.1           | JQ705797.1; X2b+226; Asia_W_America_N; 30; A73G; A153G; T195C     | 16569 | Asia_W_America_N     | X2b+226    | X           | X            | 30             |
| 3996 | JQ705798.1           | JQ705798.1; V7; Europe_S; 18; T72C; A93G; T152C                   | 16570 | Europe_S             | V7         | V           | V            | 18             |
| 3997 | JQ705799.1           | JQ705799.1; H1e1b1; Asia_W_Europe; 15; A263G; C309CCCT; T310C     | 16570 | Asia_W_Europe        | H1e1b1     | H           | H            | 15             |
| 3998 | JQ705800.1           | JQ705800.1; H55; Asia_W_Europe; 13; T204C; A263G; C315CC          | 16569 | Asia_W_Europe        | H55        | H           | H            | 13             |
| 3999 | JQ705801.1           | JQ705801.1; D4; Asia_E_America_N_S; 34; A73G; T152C; A263G        | 16570 | Asia_E_America_N_S   | D4         | D           | D            | 34             |
| 4000 | JQ705802.1           | JQ705802.1; M1a1b1c; Africa_E_Nile Valley; 45; A73G; T195C; A263G | 16569 | Africa_E_Nile Valley | M1a1b1c    | M           | M1           | 45             |
| 4001 | JQ705803.1           | JQ705803.1; H52; Asia_W_Europe; 12; T152C; A263G; C309CCCT        | 16570 | Asia_W_Europe        | H52        | H           | H            | 12             |
| 4002 | JQ705804.1           | JQ705804.1; J1c3; Asia_W; 30; A73G; G185A; G228A                  | 16569 | Asia_W               | J1c3       | J           | J            | 30             |
| 4003 | JQ705805.1           | JQ705805.1; K2a6; Asia_W; 33; A73G; T146C; T152C                  | 16569 | Asia_W               | K2a6       | K           | K            | 33             |
| 4004 | JQ705806.1           | JQ705806.1; H2a1f1; Asia_W_Europe; 10; T127C; A263G; C309CCCT     | 16571 | Asia_W_Europe        | H2a1f1     | H           | H            | 10             |
| 4005 | JQ705807.1           | JQ705807.1; H11a; Asia_W_Europe; 15; T195C; G207A; A263G          | 16570 | Asia_W_Europe        | H11a       | H           | H            | 15             |
| 4006 | JQ705808.1           | JQ705808.1; H4a1a; Asia_W_Europe; 17; A263G; C309CCCT; T310C      | 16568 | Asia_W_Europe        | H4a1a      | H           | H            | 17             |
| 4007 | JQ705809.1           | JQ705809.1; H1e1b1; Asia_W_Europe; 16; A263G; C309CCCT; T310C     | 16571 | Asia_W_Europe        | H1e1b1     | H           | H            | 16             |
| 4008 | JQ705810.1           | JQ705810.1; H73a1; Asia_W_Europe; 15; A263G; C309CCCT; T310C      | 16571 | Asia_W_Europe        | H73a1      | H           | H            | 15             |
| 4009 | JQ705811.1           | JQ705811.1; J1c14; Asia_W; 35; A73G; G185A; T195C                 | 16570 | Asia_W               | J1c14      | J           | J            | 35             |
| 4010 | JQ705812.1           | JQ705812.1; H5a6; Asia_W_Europe; 13; T152C; A263G; C315CC         | 16569 | Asia_W_Europe        | H5a6       | H           | H            | 13             |
| 4011 | JQ705813.1           | JQ705813.1; U2e1f; Asia_S_W_Europe; 43; A73G; T152C; T217C        | 16571 | Asia_S_W_Europe      | U2e1f      | U           | U2           | 43             |
| 4012 | JQ705814.1           | JQ705814.1; C4c1a; Asia_NE_America_N_S; 45; A73G; A249d; A263G    | 16569 | Asia_NE_America_N_S  | C4c1a      | C           | C            | 45             |
| 4013 | JQ705815.1           | JQ705815.1; U8b1b1; Asia_W_Europe ; 25; A73G; T195C; C315CC       | 16569 | Asia_W_Europe        | U8b1b1     | U           | U8           | 25             |
| 4014 | JQ705816.1           | JQ705816.1; K1a4a1f; Asia_W; 37; A73G; T152C; A263G               | 16567 | Asia_W               | K1a4a1f    | K           | K            | 37             |
| 4015 | JQ705817.1           | JQ705817.1; U5a2c1; Asia_W_Europe_C; 28; A73G; A263G; C315CC      | 16567 | Asia_W_Europe_C      | U5a2c1     | U           | U5           | 28             |
| 4016 | JQ705818.1           | JQ705818.1; H+16291; Asia_W_Europe; 14; A263G; C309CCCT; T310C    | 16570 | Asia_W_Europe        | H+16291    | H           | H            | 14             |
| 4017 | JQ705819.1           | JQ705819.1; U8a1a1a; Asia_W_Europe ; 32; A73G; A263G; T282C       | 16570 | Asia_W_Europe        | U8a1a1a    | U           | U8           | 32             |
| 4018 | JQ705820.1           | JQ705820.1; G2a2a; Asia_E; 43; A73G; T152C; G207A                 | 16568 | Asia_E               | G2a2a      | G           | G            | 43             |

**Supplementary Table S3** Human mitochondrial database (hMITO DB v1.0) metadata

| Row  | Name (accession no.) | Description                                                     | Size  | Geo_Region          | Haplogroup | Macro_Haplo | Macro_Haplo2 | Total Variants |
|------|----------------------|-----------------------------------------------------------------|-------|---------------------|------------|-------------|--------------|----------------|
| 4019 | JQ705821.1           | JQ705821.1; K1c2; Asia_W; 36; A73G; G143A; T146C                | 16568 | Asia_W              | K1c2       | K           | K            | 36             |
| 4020 | JQ705822.1           | JQ705822.1; H1y; Asia_W_Europe; 14; A263G; C315CC; A750G        | 16569 | Asia_W_Europe       | H1y        | H           | H            | 14             |
| 4021 | JQ705823.1           | JQ705823.1; H3b; Asia_W_Europe; 15; T195C; A263G; C309CCT       | 16570 | Asia_W_Europe       | H3b        | H           | H            | 15             |
| 4022 | JQ705824.1           | JQ705824.1; H5c1; Asia_W_Europe; 13; A263G; C315CC; C377T       | 16569 | Asia_W_Europe       | H5c1       | H           | H            | 13             |
| 4023 | JQ705825.1           | JQ705825.1; H73a1; Asia_W_Europe; 15; A263G; C309CCT; T310C     | 16570 | Asia_W_Europe       | H73a1      | H           | H            | 15             |
| 4024 | JQ705826.1           | JQ705826.1; C1b10; Asia_NE_America_N_S; 47; A73G; A249d; AA290d | 16565 | Asia_NE_America_N_S | C1b10      | C           | C            | 47             |
| 4025 | JQ705827.1           | JQ705827.1; C5c1a; Asia_NE_America_N_S; 46; A73G; T152C; A249d  | 16569 | Asia_NE_America_N_S | C5c1a      | C           | C            | 46             |
| 4026 | JQ705828.1           | JQ705828.1; U4a2f; Asia_N_Europe_N; 34; A73G; C186T; T195C      | 16568 | Asia_N_Europe_N     | U4a2f      | U           | U4           | 34             |
| 4027 | JQ705829.1           | JQ705829.1; K2a9; Asia_W; 36; A73G; T146C; A263G                | 16569 | Asia_W              | K2a9       | K           | K            | 36             |
| 4028 | JQ705830.1           | JQ705830.1; H1c2a; Asia_W_Europe; 16; T152C; A263G; C315CC      | 16569 | Asia_W_Europe       | H1c2a      | H           | H            | 16             |
| 4029 | JQ705831.1           | JQ705831.1; U8b1b; Asia_W_Europe ; 35; A73G; T146C; T195C       | 16570 | Asia_W_Europe       | U8b1b      | U           | U8           | 35             |
| 4030 | JQ705832.1           | JQ705832.1; L1b1a10; Africa_C; 78; A73G; C151T; T152C           | 16567 | Africa_C            | L1b1a10    | L1          | L1           | 78             |
| 4031 | JQ705833.1           | JQ705833.1; U4a1a; Asia_N_Europe_N; 34; A73G; T152C; T195C      | 16572 | Asia_N_Europe_N     | U4a1a      | U           | U4           | 34             |
| 4032 | JQ705834.1           | JQ705834.1; T2b; Asia_W; 36; A73G; A263G; C309CCT               | 16570 | Asia_W              | T2b        | T           | T            | 36             |
| 4033 | JQ705835.1           | JQ705835.1; C1d; Asia_NE_America_N_S; 52; A73G; C151T; A153G    | 16566 | Asia_NE_America_N_S | C1d        | C           | C            | 52             |
| 4034 | JQ705836.1           | JQ705836.1; H1b; Asia_W_Europe; 14; A263G; C271T; C315CC        | 16569 | Asia_W_Europe       | H1b        | H           | H            | 14             |
| 4035 | JQ705837.1           | JQ705837.1; H2a2a1; Asia_W_Europe; 1; C315CC; ;                 | 16569 | Asia_W_Europe       | H2a2a1     | H           | H            | 1              |
| 4036 | JQ705838.1           | JQ705838.1; K1a4a1e; Asia_W; 37; A73G; T152C; G203A             | 16571 | Asia_W              | K1a4a1e    | K           | K            | 37             |
| 4037 | JQ705839.1           | JQ705839.1; W1e; Asia_W; 34; A73G; A189G; T195C                 | 16569 | Asia_W              | W1e        | W           | W            | 34             |
| 4038 | JQ705840.1           | JQ705840.1; I1; Asia_W_SW; 37; A73G; T199C; T204C               | 16573 | Asia_W_SW           | I1         | I           | I            | 37             |
| 4039 | JQ705841.1           | JQ705841.1; K1a3a1; Asia_W; 35; A73G; A263G; C309CCT            | 16570 | Asia_W              | K1a3a1     | K           | K            | 35             |
| 4040 | JQ705842.1           | JQ705842.1; H2a2b1; Asia_W_Europe; 8; A263G; C309CCT; T310C     | 16570 | Asia_W_Europe       | H2a2b1     | H           | H            | 8              |
| 4041 | JQ705843.1           | JQ705843.1; H3+73; Asia_W_Europe; 13; A73G; A263G; C309CCT      | 16570 | Asia_W_Europe       | H3+73      | H           | H            | 13             |
| 4042 | JQ705844.1           | JQ705844.1; X2b+226; Asia_W_America_N; 30; A73G; A153G; T195C   | 16569 | Asia_W_America_N    | X2b+226    | X           | X            | 30             |
| 4043 | JQ705845.1           | JQ705845.1; H1b; Asia_W_Europe; 13; A263G; C309CCT; T310C       | 16570 | Asia_W_Europe       | H1b        | H           | H            | 13             |
| 4044 | JQ705846.1           | JQ705846.1; H1e1a6; Asia_W_Europe; 16; C150T; A263G; C309CCCT   | 16571 | Asia_W_Europe       | H1e1a6     | H           | H            | 16             |
| 4045 | JQ705847.1           | JQ705847.1; H31b; Asia_W_Europe; 13; T146C; T195C; A263G        | 16569 | Asia_W_Europe       | H31b       | H           | H            | 13             |
| 4046 | JQ705848.1           | JQ705848.1; H1q; Asia_W_Europe; 15; A249d; A263G; C309CCT       | 16569 | Asia_W_Europe       | H1q        | H           | H            | 15             |
| 4047 | JQ705849.1           | JQ705849.1; U5a1a2a1; Asia_W_Europe_C; 35; A73G; A263G; C309CCT | 16571 | Asia_W_Europe_C     | U5a1a2a1   | U           | U5           | 35             |
| 4048 | JQ705850.1           | JQ705850.1; N1a1a1a3; Africa_NE_Asia_W; 45; A73G; G143A; T152C  | 16572 | Africa_NE_Asia_W    | N1a1a1a3   | N           | N1           | 45             |
| 4049 | JQ705851.1           | JQ705851.1; L3e3b2; Africa_E; 39; A73G; C150T; T195C            | 16567 | Africa_E            | L3e3b2     | L3          | L3           | 39             |
| 4050 | JQ705852.1           | JQ705852.1; H2a1a; Asia_W_Europe; 11; A263G; C309CCT; T310C     | 16570 | Asia_W_Europe       | H2a1a      | H           | H            | 11             |
| 4051 | JQ705853.1           | JQ705853.1; H3r1; Asia_W_Europe; 12; A263G; C315CC; A750G       | 16569 | Asia_W_Europe       | H3r1       | H           | H            | 12             |
| 4052 | JQ705854.1           | JQ705854.1; T2b; Asia_W; 34; A73G; A263G; C315CC                | 16569 | Asia_W              | T2b        | T           | T            | 34             |
| 4053 | JQ705855.1           | JQ705855.1; U5a1a2a; Asia_W_Europe_C; 31; A73G; A263G; C309CCT  | 16574 | Asia_W_Europe_C     | U5a1a2a    | U           | U5           | 31             |
| 4054 | JQ705856.1           | JQ705856.1; T1a1c; Asia_W; 38; A73G; T152C; T195C               | 16569 | Asia_W              | T1a1c      | T           | T            | 38             |
| 4055 | JQ705857.1           | JQ705857.1; T2f1a1; Asia_W; 42; A73G; T195C; C198T              | 16560 | Asia_W              | T2f1a1     | T           | T            | 42             |
| 4056 | JQ705858.1           | JQ705858.1; H6a1b3; Asia_W_Europe; 18; T204C; T239C; A263G      | 16570 | Asia_W_Europe       | H6a1b3     | H           | H            | 18             |
| 4057 | JQ705859.1           | JQ705859.1; H56a; Asia_W_Europe; 11; A263G; C315CC; A750G       | 16569 | Asia_W_Europe       | H56a       | H           | H            | 11             |
| 4058 | JQ705860.1           | JQ705860.1; J1c8a; Asia_W; 29; A73G; A153G; G185A               | 16569 | Asia_W              | J1c8a      | J           | J            | 29             |
| 4059 | JQ705861.1           | JQ705861.1; U2e1a1b; Asia_S_W_Europe; 42; A73G; A108G; T152C    | 16572 | Asia_S_W_Europe     | U2e1a1b    | U           | U2           | 42             |

**Supplementary Table S3** Human mitochondrial database (hMITO DB v1.0) metadata

| Row  | Name (accession no.) | Description                                                         | Size  | Geo_Region            | Haplogroup  | Macro_Haplo | Macro_Haplo2 | Total Variants |
|------|----------------------|---------------------------------------------------------------------|-------|-----------------------|-------------|-------------|--------------|----------------|
| 4060 | JQ705862.1           | JQ705862.1; H24a; Asia_W_Europe; 10; A263G; C315CC; A373G           | 16569 | Asia_W_Europe         | H24a        | H           | H            | 10             |
| 4061 | JQ705863.1           | JQ705863.1; H5a7; Asia_W_Europe; 18; T152C; A263G; C309CCCT         | 16569 | Asia_W_Europe         | H5a7        | H           | H            | 18             |
| 4062 | JQ705864.1           | JQ705864.1; L1c2b1a1; Africa_C; 101; A73G; C151T; T152C             | 16570 | Africa_C              | L1c2b1a1    | L1          | L1           | 101            |
| 4063 | JQ705865.1           | JQ705865.1; U4b1a1a; Asia_N_Europe_N; 34; A73G; T195C; A263G        | 16570 | Asia_N_Europe_N       | U4b1a1a     | U           | U4           | 34             |
| 4064 | JQ705866.1           | JQ705866.1; H10+(16093); Asia_W_Europe; 12; A263G; C309CCCT; T310C  | 16571 | Asia_W_Europe         | H10+(16093) | H           | H            | 12             |
| 4065 | JQ705867.1           | JQ705867.1; H1u1; Asia_W_Europe; 13; A263G; C309CCCT; T310C         | 16573 | Asia_W_Europe         | H1u1        | H           | H            | 13             |
| 4066 | JQ705868.1           | JQ705868.1; J1c3e1; Asia_W; 33; A73G; G185A; G228A                  | 16570 | Asia_W                | J1c3e1      | J           | J            | 33             |
| 4067 | JQ705869.1           | JQ705869.1; K1c1b; Asia_W; 35; A73G; T146C; T152C                   | 16568 | Asia_W                | K1c1b       | K           | K            | 35             |
| 4068 | JQ705870.1           | JQ705870.1; U5b1c1; Asia_W_Europe_C; 32; A73G; G94A; C150T          | 16570 | Asia_W_Europe_C       | U5b1c1      | U           | U5           | 32             |
| 4069 | JQ705871.1           | JQ705871.1; U3a1a; Africa_NE_Asia_W; 32; A73G; C150T; A263G         | 16570 | Africa_NE_Asia_W      | U3a1a       | U           | U3           | 32             |
| 4070 | JQ705872.1           | JQ705872.1; H1j; Asia_W_Europe; 12; A263G; C309CCCT; T310C          | 16570 | Asia_W_Europe         | H1j         | H           | H            | 12             |
| 4071 | JQ705873.1           | JQ705873.1; H6a1b2; Asia_W_Europe; 16; T239C; A263G; C315CC         | 16569 | Asia_W_Europe         | H6a1b2      | H           | H            | 16             |
| 4072 | JQ705874.1           | JQ705874.1; J1c1a; Asia_W; 32; A73G; G228A; A263G                   | 16569 | Asia_W                | J1c1a       | J           | J            | 32             |
| 4073 | JQ705875.1           | JQ705875.1; H24; Asia_W_Europe; 14; T146C; A263G; C315CC            | 16569 | Asia_W_Europe         | H24         | H           | H            | 14             |
| 4074 | JQ705876.1           | JQ705876.1; H1; Asia_W_Europe; 11; A263G; C309CCCT; T310C           | 16570 | Asia_W_Europe         | H1          | H           | H            | 11             |
| 4075 | JQ705877.1           | JQ705877.1; U5b2b4a; Asia_W_Europe_C; 32; A73G; C150T; G185A        | 16571 | Asia_W_Europe_C       | U5b2b4a     | U           | U5           | 32             |
| 4076 | JQ705878.1           | JQ705878.1; H2a2a1f; Asia_W_Europe; 4; A93G; C309CCCT; T310C        | 16570 | Asia_W_Europe         | H2a2a1f     | H           | H            | 4              |
| 4077 | JQ705879.1           | JQ705879.1; T2f1a1; Asia_W; 42; A73G; T195C; A263G                  | 16560 | Asia_W                | T2f1a1      | T           | T            | 42             |
| 4078 | JQ705880.1           | JQ705880.1; H7d1; Asia_W_Europe; 14; A263G; C309CCCT; T310C         | 16570 | Asia_W_Europe         | H7d1        | H           | H            | 14             |
| 4079 | JQ705881.1           | JQ705881.1; B2+16278; Asia_SE_E_America_N_S; 35; A73G; A200G; A263G | 16564 | Asia_SE_E_America_N_S | B2+16278    | B           | B            | 35             |
| 4080 | JQ705882.1           | JQ705882.1; T2b25; Asia_W; 40; A73G; T146C; A263G                   | 16574 | Asia_W                | T2b25       | T           | T            | 40             |
| 4081 | JQ705883.1           | JQ705883.1; T2b4b; Asia_W; 38; A73G; T152C; A263G                   | 16570 | Asia_W                | T2b4b       | T           | T            | 38             |
| 4082 | JQ705884.1           | JQ705884.1; H1e1a5; Asia_W_Europe; 21; A263G; C315CC; A750G         | 16569 | Asia_W_Europe         | H1e1a5      | H           | H            | 21             |
| 4083 | JQ705885.1           | JQ705885.1; V27; Europe_S; 18; T72C; A263G; C309CCCT                | 16570 | Europe_S              | V27         | V           | V            | 18             |
| 4084 | JQ705886.1           | JQ705886.1; U5a1a2b1; Asia_W_Europe_C; 33; A73G; A263G; C309CCCT    | 16570 | Asia_W_Europe_C       | U5a1a2b1    | U           | U5           | 33             |
| 4085 | JQ705887.1           | JQ705887.1; H3t; Asia_W_Europe; 10; A263G; C315CC; A750G            | 16569 | Asia_W_Europe         | H3t         | H           | H            | 10             |
| 4086 | JQ705888.1           | JQ705888.1; H10e; Asia_W_Europe; 12; A263G; C309CCCT; T310C         | 16570 | Asia_W_Europe         | H10e        | H           | H            | 12             |
| 4087 | JQ705889.1           | JQ705889.1; I1a1; Asia_W_SW; 42; A73G; T199C; G203A                 | 16573 | Asia_W_SW             | I1a1        | I           | I            | 42             |
| 4088 | JQ705890.1           | JQ705890.1; H27a; Asia_W_Europe; 12; A263G; C315CC; A750G           | 16569 | Asia_W_Europe         | H27a        | H           | H            | 12             |
| 4089 | JQ705891.1           | JQ705891.1; J1c14; Asia_W; 36; A73G; G185A; T195C                   | 16570 | Asia_W                | J1c14       | J           | J            | 36             |
| 4090 | JQ705892.1           | JQ705892.1; T2f1a1; Asia_W; 43; A73G; T195C; A263G                  | 16560 | Asia_W                | T2f1a1      | T           | T            | 43             |
| 4091 | JQ705893.1           | JQ705893.1; H94; Asia_W_Europe; 11; A263G; C315CC; A750G            | 16569 | Asia_W_Europe         | H94         | H           | H            | 11             |
| 4092 | JQ705894.1           | JQ705894.1; H1c4b; Asia_W_Europe; 14; T152C; A263G; C315CC          | 16569 | Asia_W_Europe         | H1c4b       | H           | H            | 14             |
| 4093 | JQ705895.1           | JQ705895.1; T2b21a; Asia_W; 39; A73G; T152C; A263G                  | 16569 | Asia_W                | T2b21a      | T           | T            | 39             |
| 4094 | JQ705896.1           | JQ705896.1; G3a2a; Asia_E; 40; A73G; G143A; T152C                   | 16571 | Asia_E                | G3a2a       | G           | G            | 40             |
| 4095 | JQ705897.1           | JQ705897.1; T2f1a1; Asia_W; 41; A73G; T195C; A263G                  | 16560 | Asia_W                | T2f1a1      | T           | T            | 41             |
| 4096 | JQ705898.1           | JQ705898.1; H11a; Asia_W_Europe; 14; T195C; A263G; C309CCCT         | 16571 | Asia_W_Europe         | H11a        | H           | H            | 14             |
| 4097 | JQ705899.1           | JQ705899.1; T2b19; Asia_W; 36; A73G; A263G; C315CC                  | 16567 | Asia_W                | T2b19       | T           | T            | 36             |
| 4098 | JQ705900.1           | JQ705900.1; U2e2a; Asia_S_W_Europe; 44; A73G; T152C; T217C          | 16570 | Asia_S_W_Europe       | U2e2a       | U           | U2           | 44             |
| 4099 | JQ705901.1           | JQ705901.1; K1a+150; Asia_W; 33; A73G; C150T; T195C                 | 16573 | Asia_W                | K1a+150     | K           | K            | 33             |
| 4100 | JQ705902.1           | JQ705902.1; L3e1a3a; Africa_E; 34; A73G; C150T; A200G               | 16569 | Africa_E              | L3e1a3a     | L3          | L3           | 34             |

**Supplementary Table S3** Human mitochondrial database (hMITO DB v1.0) metadata

| Row  | Name (accession no.) | Description                                                        | Size  | Geo_Region          | Haplogroup  | Macro_Haplo | Macro_Haplo2 | Total Variants |
|------|----------------------|--------------------------------------------------------------------|-------|---------------------|-------------|-------------|--------------|----------------|
| 4101 | JQ705903.1           | JQ705903.1; H1e; Asia_W_Europe; 14; A263G; C309CCT; T310C          | 16570 | Asia_W_Europe       | H1e         | H           | H            | 14             |
| 4102 | JQ705904.1           | JQ705904.1; D1; Asia_E_America_N_S; 39; A73G; G143A; A263G         | 16569 | Asia_E_America_N_S  | D1          | D           | D            | 39             |
| 4103 | JQ705905.1           | JQ705905.1; H3ae; Asia_W_Europe; 12; A263G; C309CCT; T310C         | 16570 | Asia_W_Europe       | H3ae        | H           | H            | 12             |
| 4104 | JQ705906.1           | JQ705906.1; I4a1; Asia_W_SW; 34; A73G; T199C; T204C                | 16571 | Asia_W_SW           | I4a1        | I           | I            | 34             |
| 4105 | JQ705907.1           | JQ705907.1; U4a2a; Asia_N_Europe_N; 30; A73G; C150T; T195C         | 16570 | Asia_N_Europe_N     | U4a2a       | U           | U4           | 30             |
| 4106 | JQ705908.1           | JQ705908.1; U5a1c2a1; Asia_W_Europe_C; 31; A73G; A183G; G184A      | 16570 | Asia_W_Europe_C     | U5a1c2a1    | U           | U5           | 31             |
| 4107 | JQ705909.1           | JQ705909.1; J1b1a1; Asia_W; 38; A73G; C242T; A263G                 | 16569 | Asia_W              | J1b1a1      | J           | J            | 38             |
| 4108 | JQ705910.1           | JQ705910.1; U5a1h; Asia_W_Europe_C; 35; A73G; C150T; A263G         | 16570 | Asia_W_Europe_C     | U5a1h       | U           | U5           | 35             |
| 4109 | JQ705911.1           | JQ705911.1; U1b1; Asia_W; 32; A73G; T146C; A263G                   | 16572 | Asia_W              | U1b1        | U           | U1           | 32             |
| 4110 | JQ705912.1           | JQ705912.1; L3d1d; Africa_E; 42; A73G; T152C; A263G                | 16568 | Africa_E            | L3d1d       | L3          | L3           | 42             |
| 4111 | JQ705913.1           | JQ705913.1; T2b3+151; Asia_W; 39; A73G; C151T; A263G               | 16570 | Asia_W              | T2b3+151    | T           | T            | 39             |
| 4112 | JQ705914.1           | JQ705914.1; H1j8; Asia_W_Europe; 16; A263G; C309CCCT; T310C        | 16571 | Asia_W_Europe       | H1j8        | H           | H            | 16             |
| 4113 | JQ705915.1           | JQ705915.1; H3z; Asia_W_Europe; 12; T152C; A263G; T293C            | 16571 | Asia_W_Europe       | H3z         | H           | H            | 12             |
| 4114 | JQ705916.1           | JQ705916.1; R0a2m; Africa_NE_Asia_W; 21; T57TC; C64T; A263G        | 16570 | Africa_NE_Asia_W    | R0a2m       | R           | R0           | 21             |
| 4115 | JQ705917.1           | JQ705917.1; H34; Asia_W_Europe; 14; T152C; A263G; C315CC           | 16569 | Asia_W_Europe       | H34         | H           | H            | 14             |
| 4116 | JQ705918.1           | JQ705918.1; H1ad; Asia_W_Europe; 13; A263G; C309CCCT; T310C        | 16573 | Asia_W_Europe       | H1ad        | H           | H            | 13             |
| 4117 | JQ705919.1           | JQ705919.1; U4a2; Asia_N_Europe_N; 30; A73G; T195C; A263G          | 16570 | Asia_N_Europe_N     | U4a2        | U           | U4           | 30             |
| 4118 | JQ705920.1           | JQ705920.1; C1b10; Asia_NE_America_N_S; 46; A73G; A249d; AA290d    | 16565 | Asia_NE_America_N_S | C1b10       | C           | C            | 46             |
| 4119 | JQ705921.1           | JQ705921.1; I2a2; Asia_W_SW; 41; A73G; T152C; T199C                | 16574 | Asia_W_SW           | I2a2        | I           | I            | 41             |
| 4120 | JQ705922.1           | JQ705922.1; J1c3; Asia_W; 30; A73G; C182T; G185A                   | 16569 | Asia_W              | J1c3        | J           | J            | 30             |
| 4121 | JQ705923.1           | JQ705923.1; J1b1a1; Asia_W; 37; A73G; A153G; C242T                 | 16569 | Asia_W              | J1b1a1      | J           | J            | 37             |
| 4122 | JQ705924.1           | JQ705924.1; H23; Asia_W_Europe; 11; A263G; C309CCT; T310C          | 16572 | Asia_W_Europe       | H23         | H           | H            | 11             |
| 4123 | JQ705925.1           | JQ705925.1; J2b1a; Asia_W; 32; A73G; C150T; T152C                  | 16570 | Asia_W              | J2b1a       | J           | J            | 32             |
| 4124 | JQ705926.1           | JQ705926.1; U4d3; Asia_N_Europe_N; 33; A73G; T195C; A263G          | 16572 | Asia_N_Europe_N     | U4d3        | U           | U4           | 33             |
| 4125 | JQ705927.1           | JQ705927.1; T2f1a1; Asia_W; 40; A73G; T195C; A263G                 | 16560 | Asia_W              | T2f1a1      | T           | T            | 40             |
| 4126 | JQ705928.1           | JQ705928.1; H11a; Asia_W_Europe; 16; T195C; A263G; C309CCT         | 16570 | Asia_W_Europe       | H11a        | H           | H            | 16             |
| 4127 | JQ705929.1           | JQ705929.1; H35a; Asia_W_Europe; 14; A263G; C309CCT; T310C         | 16570 | Asia_W_Europe       | H35a        | H           | H            | 14             |
| 4128 | JQ705930.1           | JQ705930.1; H1n1b; Asia_W_Europe; 16; T146C; A263G; C309CCCT       | 16573 | Asia_W_Europe       | H1n1b       | H           | H            | 16             |
| 4129 | JQ705931.1           | JQ705931.1; L1b1a12b; Africa_C; 78; A73G; T152C; C182T             | 16567 | Africa_C            | L1b1a12b    | L1          | L1           | 78             |
| 4130 | JQ705932.1           | JQ705932.1; I1c; Asia_W_SW; 43; A73G; T199C; T204C                 | 16572 | Asia_W_SW           | I1c         | I           | I            | 43             |
| 4131 | JQ705933.1           | JQ705933.1; U2e1c1; Asia_S_W_Europe; 38; A73G; T152C; T217C        | 16569 | Asia_S_W_Europe     | U2e1c1      | U           | U2           | 38             |
| 4132 | JQ705934.1           | JQ705934.1; H; Asia_W_Europe; 10; A73G; A263G; C315CC              | 16569 | Asia_W_Europe       | H           | H           | H            | 10             |
| 4133 | JQ705935.1           | JQ705935.1; U5a1b+16362; Asia_W_Europe_C; 28; A73G; A263G; C309CCT | 16570 | Asia_W_Europe_C     | U5a1b+16362 | U           | U5           | 28             |
| 4134 | JQ705936.1           | JQ705936.1; U2e1a1a; Asia_S_W_Europe; 41; A73G; T152C; T217C       | 16571 | Asia_S_W_Europe     | U2e1a1a     | U           | U2           | 41             |
| 4135 | JQ705937.1           | JQ705937.1; H10e1; Asia_W_Europe; 12; A263G; C309CCT; T310C        | 16570 | Asia_W_Europe       | H10e1       | H           | H            | 12             |
| 4136 | JQ705938.1           | JQ705938.1; K1a4a1e; Asia_W; 37; A73G; T152C; T204C                | 16571 | Asia_W              | K1a4a1e     | K           | K            | 37             |
| 4137 | JQ705939.1           | JQ705939.1; T2b4b; Asia_W; 35; A73G; T152C; A263G                  | 16569 | Asia_W              | T2b4b       | T           | T            | 35             |
| 4138 | JQ705940.1           | JQ705940.1; H1bo; Asia_W_Europe; 15; A263G; C309CCCT; T310C        | 16571 | Asia_W_Europe       | H1bo        | H           | H            | 15             |
| 4139 | JQ705941.1           | JQ705941.1; U2e1b; Asia_S_W_Europe; 46; A73G; C151T; T152C         | 16571 | Asia_S_W_Europe     | U2e1b       | U           | U2           | 46             |
| 4140 | JQ705942.1           | JQ705942.1; V5; Europe_S; 17; T72C; A93G; A263G                    | 16571 | Europe_S            | V5          | V           | V            | 17             |
| 4141 | JQ705943.1           | JQ705943.1; C1b5a; Asia_NE_America_N_S; 48; A73G; A249d; A263G     | 16565 | Asia_NE_America_N_S | C1b5a       | C           | C            | 48             |

**Supplementary Table S3** Human mitochondrial database (hMITO DB v1.0) metadata

| Row  | Name (accession no.) | Description                                                    | Size  | Geo_Region        | Haplogroup  | Macro_Haplo | Macro_Haplo2 | Total Variants |
|------|----------------------|----------------------------------------------------------------|-------|-------------------|-------------|-------------|--------------|----------------|
| 4142 | JQ705944.1           | JQ705944.1; H1r; Asia_W_Europe; 12; A263G; C309CCT; T310C      | 16570 | Asia_W_Europe     | H1r         | H           | H            | 12             |
| 4143 | JQ705945.1           | JQ705945.1; V7b; Europe_S; 18; T72C; A93G; A263G               | 16570 | Europe_S          | V7b         | V           | V            | 18             |
| 4144 | JQ705946.1           | JQ705946.1; U2e1b2; Asia_S_W_Europe; 45; A73G; T152C; T217C    | 16574 | Asia_S_W_Europe   | U2e1b2      | U           | U2           | 45             |
| 4145 | JQ705947.1           | JQ705947.1; U5b2c2a; Asia_W_Europe_C; 32; A73G; C150T; A263G   | 16570 | Asia_W_Europe_C   | U5b2c2a     | U           | U5           | 32             |
| 4146 | JQ705948.1           | JQ705948.1; T2b; Asia_W; 35; A73G; T195C; A263G                | 16571 | Asia_W            | T2b         | T           | T            | 35             |
| 4147 | JQ705949.1           | JQ705949.1; H2c; Asia_W_Europe; 16; A263G; C309CCCT; T310C     | 16569 | Asia_W_Europe     | H2c         | H           | H            | 16             |
| 4148 | JQ705950.1           | JQ705950.1; H10e1; Asia_W_Europe; 13; A263G; C309CCT; T310C    | 16571 | Asia_W_Europe     | H10e1       | H           | H            | 13             |
| 4149 | JQ705951.1           | JQ705951.1; K1a1b1a; Asia_W; 38; A73G; C114T; A263G            | 16569 | Asia_W            | K1a1b1a     | K           | K            | 38             |
| 4150 | JQ705952.1           | JQ705952.1; A5a1a1; Asia_NE_America_N; 35; A73G; T195C; A235G  | 16569 | Asia_NE_America_N | A5a1a1      | A           | A            | 35             |
| 4151 | JQ705953.1           | JQ705953.1; H; Asia_W_Europe; 8; A263G; C315CC; A750G          | 16569 | Asia_W_Europe     | H           | H           | H            | 8              |
| 4152 | JQ705954.1           | JQ705954.1; H11a2a2; Asia_W_Europe; 21; T195C; A263G; C315CC   | 16569 | Asia_W_Europe     | H11a2a2     | H           | H            | 21             |
| 4153 | JQ705955.1           | JQ705955.1; T1a1; Asia_W; 36; A73G; T152C; T195C               | 16570 | Asia_W            | T1a1        | T           | T            | 36             |
| 4154 | JQ705956.1           | JQ705956.1; H2a2a2; Asia_W_Europe; 9; T152C; A263G; C309CCT    | 16570 | Asia_W_Europe     | H2a2a2      | H           | H            | 9              |
| 4155 | JQ705957.1           | JQ705957.1; K1a3a2; Asia_W; 35; A73G; A263G; C315CC            | 16569 | Asia_W            | K1a3a2      | K           | K            | 35             |
| 4156 | JQ705958.1           | JQ705958.1; H1b1; Asia_W_Europe; 11; A263G; C315CC; A750G      | 16569 | Asia_W_Europe     | H1b1        | H           | H            | 11             |
| 4157 | JQ705959.1           | JQ705959.1; R31a; Asia_S_SE; 32; A73G; T146C; A263G            | 16568 | Asia_S_SE         | R31a        | R           | R31          | 32             |
| 4158 | JQ705960.1           | JQ705960.1; H10a; Asia_W_Europe; 12; A263G; C309CCCT; T310C    | 16571 | Asia_W_Europe     | H10a        | H           | H            | 12             |
| 4159 | JQ705961.1           | JQ705961.1; J1c2c1a; Asia_W; 37; A73G; T146C; G185A            | 16569 | Asia_W            | J1c2c1a     | J           | J            | 37             |
| 4160 | JQ705962.1           | JQ705962.1; X2b4; Asia_W_America_N; 33; A73G; A153G; T195C     | 16570 | Asia_W_America_N  | X2b4        | X           | X            | 33             |
| 4161 | JQ705963.1           | JQ705963.1; HV0e; Asia_W; 17; T195C; A263G; C309CCT            | 16570 | Asia_W            | HV0e        | HV          | HV           | 17             |
| 4162 | JQ705964.1           | JQ705964.1; J1b1a1c; Asia_W; 39; T10C; A73G; T146C             | 16569 | Asia_W            | J1b1a1c     | J           | J            | 39             |
| 4163 | JQ705965.1           | JQ705965.1; M5a1; Asia_S; 43; A73G; T146C; T195C               | 16570 | Asia_S            | M5a1        | M           | M5           | 43             |
| 4164 | JQ705966.1           | JQ705966.1; U7a3a; Asia_W; 37; A73G; C151T; T152C              | 16567 | Asia_W            | U7a3a       | U           | U7           | 37             |
| 4165 | JQ705967.1           | JQ705967.1; HV0e; Asia_W; 17; T72C; T195C; A263G               | 16570 | Asia_W            | HV0e        | HV          | HV           | 17             |
| 4166 | JQ705968.1           | JQ705968.1; U5b3; Asia_W_Europe_C; 27; A73G; C150T; A263G      | 16569 | Asia_W_Europe_C   | U5b3        | U           | U5           | 27             |
| 4167 | JQ705969.1           | JQ705969.1; H56; Asia_W_Europe; 13; A263G; C315CC; A750G       | 16569 | Asia_W_Europe     | H56         | H           | H            | 13             |
| 4168 | JQ705970.1           | JQ705970.1; X2b8; Asia_W_America_N; 33; A73G; T195C; G225A     | 16570 | Asia_W_America_N  | X2b8        | X           | X            | 33             |
| 4169 | JQ705971.1           | JQ705971.1; H5a1; Asia_W_Europe; 15; A263G; C309CCT; T310C     | 16568 | Asia_W_Europe     | H5a1        | H           | H            | 15             |
| 4170 | JQ705972.1           | JQ705972.1; T2b6b; Asia_W; 44; A73G; T146C; A263G              | 16570 | Asia_W            | T2b6b       | T           | T            | 44             |
| 4171 | JQ705973.1           | JQ705973.1; A2q; Asia_NE_America_N; 32; C64T; A73G; T146C      | 16567 | Asia_NE_America_N | A2q         | A           | A            | 32             |
| 4172 | JQ705974.1           | JQ705974.1; H3+152; Asia_W_Europe; 14; T152C; A263G; C309CCT   | 16570 | Asia_W_Europe     | H3+152      | H           | H            | 14             |
| 4173 | JQ705975.1           | JQ705975.1; H66a; Asia_W_Europe; 11; A263G; C315CC; A750G      | 16569 | Asia_W_Europe     | H66a        | H           | H            | 11             |
| 4174 | JQ705976.1           | JQ705976.1; H1j; Asia_W_Europe; 11; T152C; A263G; C315CC       | 16569 | Asia_W_Europe     | H1j         | H           | H            | 11             |
| 4175 | JQ705977.1           | JQ705977.1; J1c9; Asia_W; 32; A73G; G185A; G228A               | 16569 | Asia_W            | J1c9        | J           | J            | 32             |
| 4176 | JQ705978.1           | JQ705978.1; H2a2a1; Asia_W_Europe; 1; C315CC; ;                | 16569 | Asia_W_Europe     | H2a2a1      | H           | H            | 1              |
| 4177 | JQ705979.1           | JQ705979.1; K1a1b1a; Asia_W; 35; A73G; A263G; C315CC           | 16569 | Asia_W            | K1a1b1a     | K           | K            | 35             |
| 4178 | JQ705980.1           | JQ705980.1; K1a4a1a+195; Asia_W; 38; A73G; T195C; A263G        | 16571 | Asia_W            | K1a4a1a+195 | K           | K            | 38             |
| 4179 | JQ705981.1           | JQ705981.1; H13a1a1a; Asia_W_Europe; 16; T152C; A263G; C309CCT | 16570 | Asia_W_Europe     | H13a1a1a    | H           | H            | 16             |
| 4180 | JQ705982.1           | JQ705982.1; T1a1a; Asia_W; 36; A73G; T152C; T195C              | 16569 | Asia_W            | T1a1a       | T           | T            | 36             |
| 4181 | JQ705983.1           | JQ705983.1; H8c; Asia_W_Europe; 16; T146C; T152C; T195C        | 16569 | Asia_W_Europe     | H8c         | H           | H            | 16             |
| 4182 | JQ705984.1           | JQ705984.1; H11a; Asia_W_Europe; 14; T195C; A263G; C309CCCT    | 16571 | Asia_W_Europe     | H11a        | H           | H            | 14             |

**Supplementary Table S3** Human mitochondrial database (hMITO DB v1.0) metadata

| Row  | Name (accession no.) | Description                                                        | Size  | Geo_Region       | Haplogroup  | Macro_Haplo | Macro_Haplo2 | Total Variants |
|------|----------------------|--------------------------------------------------------------------|-------|------------------|-------------|-------------|--------------|----------------|
| 4183 | JQ705985.1           | JQ705985.1; H1f1; Asia_W_Europe; 14; A263G; C315CC; A750G          | 16569 | Asia_W_Europe    | H1f1        | H           | H            | 14             |
| 4184 | JQ705986.1           | JQ705986.1; J1c2b; Asia_W; 33; A73G; T152C; G185A                  | 16570 | Asia_W           | J1c2b       | J           | J            | 33             |
| 4185 | JQ705987.1           | JQ705987.1; H1n+146; Asia_W_Europe; 13; T146C; A263G; C309CCT      | 16570 | Asia_W_Europe    | H1n+146     | H           | H            | 13             |
| 4186 | JQ705988.1           | JQ705988.1; X2n; Asia_W_America_N; 36; C64T; A73G; A153G           | 16568 | Asia_W_America_N | X2n         | X           | X            | 36             |
| 4187 | JQ705989.1           | JQ705989.1; U2e1a1; Asia_S_W_Europe; 39; A73G; T152C; T217C        | 16571 | Asia_S_W_Europe  | U2e1a1      | U           | U2           | 39             |
| 4188 | JQ705990.1           | JQ705990.1; W3b; Asia_W; 41; A73G; A189G; C194T                    | 16570 | Asia_W           | W3b         | W           | W            | 41             |
| 4189 | JQ705991.1           | JQ705991.1; M5a1b; Asia_S; 39; A73G; A263G; C309CCT                | 16570 | Asia_S           | M5a1b       | M           | M5           | 39             |
| 4190 | JQ705992.1           | JQ705992.1; H1c1; Asia_W_Europe; 14; A263G; C315CC; T477C          | 16569 | Asia_W_Europe    | H1c1        | H           | H            | 14             |
| 4191 | JQ705993.1           | JQ705993.1; H1a3b; Asia_W_Europe; 15; A73G; T195C; A263G           | 16567 | Asia_W_Europe    | H1a3b       | H           | H            | 15             |
| 4192 | JQ705994.1           | JQ705994.1; K1c2; Asia_W; 36; A73G; T146C; T152C                   | 16568 | Asia_W           | K1c2        | K           | K            | 36             |
| 4193 | JQ705995.1           | JQ705995.1; T2b6b; Asia_W; 44; A73G; T146C; A263G                  | 16570 | Asia_W           | T2b6b       | T           | T            | 44             |
| 4194 | JQ705996.1           | JQ705996.1; J1c2h; Asia_W; 31; A73G; G185A; A188G                  | 16570 | Asia_W           | J1c2h       | J           | J            | 31             |
| 4195 | JQ705997.1           | JQ705997.1; H28a; Asia_W_Europe; 14; C186A; T195C; A263G           | 16569 | Asia_W_Europe    | H28a        | H           | H            | 14             |
| 4196 | JQ705998.1           | JQ705998.1; H5a1m; Asia_W_Europe; 16; T152C; A263G; C309CCT        | 16568 | Asia_W_Europe    | H5a1m       | H           | H            | 16             |
| 4197 | JQ705999.1           | JQ705999.1; U2d2; Asia_S_W_Europe; 37; A73G; T152C; T199C          | 16570 | Asia_S_W_Europe  | U2d2        | U           | U2           | 37             |
| 4198 | JQ706000.1           | JQ706000.1; H51a; Asia_W_Europe; 13; A263G; C309CCT; T310C         | 16570 | Asia_W_Europe    | H51a        | H           | H            | 13             |
| 4199 | JQ706001.1           | JQ706001.1; K1a2b; Asia_W; 35; A73G; T152C; A263G                  | 16571 | Asia_W           | K1a2b       | K           | K            | 35             |
| 4200 | JQ706002.1           | JQ706002.1; H1c6; Asia_W_Europe; 13; C41T; A263G; C309CCT          | 16570 | Asia_W_Europe    | H1c6        | H           | H            | 13             |
| 4201 | JQ706003.1           | JQ706003.1; H11a+152; Asia_W_Europe; 17; T152C; T195C; A263G       | 16571 | Asia_W_Europe    | H11a+152    | H           | H            | 17             |
| 4202 | JQ706004.1           | JQ706004.1; H13a1a1a; Asia_W_Europe; 18; A263G; C309CCT; T310C     | 16570 | Asia_W_Europe    | H13a1a1a    | H           | H            | 18             |
| 4203 | JQ706005.1           | JQ706005.1; U4a1a; Asia_N_Europe_N; 35; A73G; C150T; T152C         | 16572 | Asia_N_Europe_N  | U4a1a       | U           | U4           | 35             |
| 4204 | JQ706006.1           | JQ706006.1; K1a1b1a; Asia_W; 38; A73G; C114T; T152C                | 16569 | Asia_W           | K1a1b1a     | K           | K            | 38             |
| 4205 | JQ706007.1           | JQ706007.1; K1c2; Asia_W; 36; A73G; T146C; T152C                   | 16568 | Asia_W           | K1c2        | K           | K            | 36             |
| 4206 | JQ706008.1           | JQ706008.1; T2a1a; Asia_W; 34; A73G; A263G; C309CCT                | 16570 | Asia_W           | T2a1a       | T           | T            | 34             |
| 4207 | JQ706009.1           | JQ706009.1; H1c1; Asia_W_Europe; 13; A263G; C315CC; T477C          | 16569 | Asia_W_Europe    | H1c1        | H           | H            | 13             |
| 4208 | JQ706010.1           | JQ706010.1; H1b2; Asia_W_Europe; 14; A263G; C309CCT; T310C         | 16570 | Asia_W_Europe    | H1b2        | H           | H            | 14             |
| 4209 | JQ706011.1           | JQ706011.1; H2a2b; Asia_W_Europe; 8; A263G; C309CCCT; T310C        | 16571 | Asia_W_Europe    | H2a2b       | H           | H            | 8              |
| 4210 | JQ706012.1           | JQ706012.1; H3i1; Asia_W_Europe; 12; T152C; A263G; C315CC          | 16569 | Asia_W_Europe    | H3i1        | H           | H            | 12             |
| 4211 | JQ706013.1           | JQ706013.1; J1c3g; Asia_W; 29; A73G; G185A; A263G                  | 16569 | Asia_W           | J1c3g       | J           | J            | 29             |
| 4212 | JQ706014.1           | JQ706014.1; L2a1a1; Africa_W_C; 62; A73G; T146C; T152C             | 16574 | Africa_W_C       | L2a1a1      | L2          | L2           | 62             |
| 4213 | JQ706015.1           | JQ706015.1; U5a1b1a1; Asia_W_Europe_C; 29; A73G; A263G; C315CC     | 16569 | Asia_W_Europe_C  | U5a1b1a1    | U           | U5           | 29             |
| 4214 | JQ706016.1           | JQ706016.1; HV0+195; Asia_W; 15; T72C; T195C; A263G                | 16570 | Asia_W           | HV0+195     | HV          | HV           | 15             |
| 4215 | JQ706017.1           | JQ706017.1; I4a; Asia_W_SW; 36; A73G; T199C; T204C                 | 16572 | Asia_W_SW        | I4a         | I           | I            | 36             |
| 4216 | JQ706018.1           | JQ706018.1; H2a(H2a+152 16311); Asia_W_Europe; 2; C315CC; T16311C; | 16569 | Asia_W_Europe    | H2a(H2a+152 | 1H          | H            | 2              |
| 4217 | JQ706019.1           | JQ706019.1; U5b2b; Asia_W_Europe_C; 28; A73G; C150T; A263G         | 16569 | Asia_W_Europe_C  | U5b2b       | U           | U5           | 28             |
| 4218 | JQ706020.1           | JQ706020.1; K1a4c1; Asia_W; 38; A73G; T152C; A263G                 | 16571 | Asia_W           | K1a4c1      | K           | K            | 38             |
| 4219 | JQ706021.1           | JQ706021.1; W1c; Asia_W; 38; A73G; T119C; A189G                    | 16569 | Asia_W           | W1c         | W           | W            | 38             |
| 4220 | JQ706022.1           | JQ706022.1; J1c17a; Asia_W; 31; A73G; G185A; G228A                 | 16569 | Asia_W           | J1c17a      | J           | J            | 31             |
| 4221 | JQ706023.1           | JQ706023.1; X2b; Asia_W_America_N; 34; A73G; A153G; T195C          | 16570 | Asia_W_America_N | X2b         | X           | X            | 34             |
| 4222 | JQ706024.1           | JQ706024.1; W3a1c; Asia_W; 38; A73G; A189G; C194T                  | 16570 | Asia_W           | W3a1c       | W           | W            | 38             |
| 4223 | JQ706025.1           | JQ706025.1; U2d3; Asia_S_W_Europe; 34; A73G; T152C; T199C          | 16569 | Asia_S_W_Europe  | U2d3        | U           | U2           | 34             |

**Supplementary Table S3** Human mitochondrial database (hMITO DB v1.0) metadata

| Row  | Name (accession no.) | Description                                                | Size  | Geo_Region      | Haplogroup | Macro_Haplo | Macro_Haplo2 | Total Variants |
|------|----------------------|------------------------------------------------------------|-------|-----------------|------------|-------------|--------------|----------------|
| 4224 | JQ706026.1           | JQ706026.1; U2d2a; Asia_S_W_Europe; 35; A73G; T152C; A188G | 16569 | Asia_S_W_Europe | U2d2a      | U           | U2           | 35             |
| 4225 | JQ706027.1           | JQ706027.1; K1a; Asia_W; 33; A73G; A263G; C497T            | 16569 | Asia_W          | K1a        | K           | K            | 33             |
| 4226 | JQ706028.1           | JQ706028.1; K1c2; Asia_W; 38; A73G; T146C; T152C           | 16569 | Asia_W          | K1c2       | K           | K            | 38             |
| 4227 | JQ706029.1           | JQ706029.1; K1a7; Asia_W; 30; A73G; A263G; C431A           | 16569 | Asia_W          | K1a7       | K           | K            | 30             |
| 4228 | JQ706030.1           | JQ706030.1; K1a13a; Asia_W; 36; A73G; T146C; T195C         | 16569 | Asia_W          | K1a13a     | K           | K            | 36             |
| 4229 | JQ706031.1           | JQ706031.1; K1a; Asia_W; 34; A73G; T152C; A263G            | 16569 | Asia_W          | K1a        | K           | K            | 34             |
| 4230 | JQ706032.1           | JQ706032.1; U2d1; Asia_S_W_Europe; 36; A73G; T152C; T199C  | 16569 | Asia_S_W_Europe | U2d1       | U           | U2           | 36             |
| 4231 | JQ706033.1           | JQ706033.1; K1a+195; Asia_W; 37; A73G; T152C; T195C        | 16569 | Asia_W          | K1a+195    | K           | K            | 37             |
| 4232 | JQ706034.1           | JQ706034.1; K1a17; Asia_W; 31; A73G; G247A; A263G          | 16569 | Asia_W          | K1a17      | K           | K            | 31             |
| 4233 | JQ706035.1           | JQ706035.1; K1a12a1; Asia_W; 35; A73G; A263G; C497T        | 16568 | Asia_W          | K1a12a1    | K           | K            | 35             |
| 4234 | JQ706036.1           | JQ706036.1; K1a12a1; Asia_W; 40; A73G; C150T; T152C        | 16569 | Asia_W          | K1a12a1    | K           | K            | 40             |
| 4235 | JQ706037.1           | JQ706037.1; K1a; Asia_W; 32; A73G; A263G; C497T            | 16569 | Asia_W          | K1a        | K           | K            | 32             |
| 4236 | JQ706038.1           | JQ706038.1; K1a; Asia_W; 28; A73G; A263G; C497T            | 16569 | Asia_W          | K1a        | K           | K            | 28             |
| 4237 | JQ706039.1           | JQ706039.1; K1a19a; Asia_W; 38; T63C; C64T; A73G           | 16569 | Asia_W          | K1a19a     | K           | K            | 38             |
| 4238 | JQ706040.1           | JQ706040.1; K1a19; Asia_W; 34; A73G; A263G; C497T          | 16568 | Asia_W          | K1a19      | K           | K            | 34             |
| 4239 | JQ706041.1           | JQ706041.1; U2d1; Asia_S_W_Europe; 35; A73G; T152C; C182T  | 16569 | Asia_S_W_Europe | U2d1       | U           | U2           | 35             |
| 4240 | JQ706042.1           | JQ706042.1; K1a23; Asia_W; 34; A73G; T195C; A263G          | 16569 | Asia_W          | K1a23      | K           | K            | 34             |
| 4241 | JQ706043.1           | JQ706043.1; K1a8b; Asia_W; 35; A73G; T152C; A263G          | 16569 | Asia_W          | K1a8b      | K           | K            | 35             |
| 4242 | JQ706044.1           | JQ706044.1; K1a3; Asia_W; 31; A73G; A263G; C497T           | 16569 | Asia_W          | K1a3       | K           | K            | 31             |
| 4243 | JQ706045.1           | JQ706045.1; U2d3; Asia_S_W_Europe; 34; A73G; T152C; T199C  | 16569 | Asia_S_W_Europe | U2d3       | U           | U2           | 34             |
| 4244 | JQ706046.1           | JQ706046.1; U2d2a; Asia_S_W_Europe; 34; A73G; T152C; T199C | 16569 | Asia_S_W_Europe | U2d2a      | U           | U2           | 34             |
| 4245 | JQ706047.1           | JQ706047.1; U2d1; Asia_S_W_Europe; 31; A73G; T152C; T199C  | 16569 | Asia_S_W_Europe | U2d1       | U           | U2           | 31             |
| 4246 | JQ706048.1           | JQ706048.1; K1a18; Asia_W; 34; A73G; T152C; A263G          | 16569 | Asia_W          | K1a18      | K           | K            | 34             |
| 4247 | JQ706049.1           | JQ706049.1; K1a+150; Asia_W; 32; A73G; C150T; A243G        | 16569 | Asia_W          | K1a+150    | K           | K            | 32             |
| 4248 | JQ706050.1           | JQ706050.1; K1a12a; Asia_W; 35; A73G; A263G; C497T         | 16568 | Asia_W          | K1a12a     | K           | K            | 35             |
| 4249 | JQ706051.1           | JQ706051.1; K1a25; Asia_W; 36; A73G; T152C; A263G          | 16569 | Asia_W          | K1a25      | K           | K            | 36             |
| 4250 | JQ706052.1           | JQ706052.1; K1a8b; Asia_W; 36; A73G; A263G; C295T          | 16569 | Asia_W          | K1a8b      | K           | K            | 36             |
| 4251 | JQ706053.1           | JQ706053.1; K1a; Asia_W; 32; A73G; T173C; A263G            | 16569 | Asia_W          | K1a        | K           | K            | 32             |
| 4252 | JQ706054.1           | JQ706054.1; K1a18; Asia_W; 33; A73G; T152C; A263G          | 16569 | Asia_W          | K1a18      | K           | K            | 33             |
| 4253 | JQ706055.1           | JQ706055.1; K1a7; Asia_W; 31; A73G; A263G; C431A           | 16569 | Asia_W          | K1a7       | K           | K            | 31             |
| 4254 | JQ706056.1           | JQ706056.1; K1a31; Asia_W; 30; A73G; C150T; A263G          | 16569 | Asia_W          | K1a31      | K           | K            | 30             |
| 4255 | JQ706057.1           | JQ706057.1; K1a1b1e; Asia_W; 33; A73G; A263G; C497T        | 16569 | Asia_W          | K1a1b1e    | K           | K            | 33             |
| 4256 | JQ706058.1           | JQ706058.1; K1a19; Asia_W; 34; A73G; A263G; C497T          | 16569 | Asia_W          | K1a19      | K           | K            | 34             |
| 4257 | JQ706059.1           | JQ706059.1; K1a5b; Asia_W; 35; A73G; A153G; A263G          | 16569 | Asia_W          | K1a5b      | K           | K            | 35             |
| 4258 | JQ706060.1           | JQ706060.1; K1a; Asia_W; 34; A73G; T146C; A263G            | 16569 | Asia_W          | K1a        | K           | K            | 34             |
| 4259 | JQ706061.1           | JQ706061.1; K1a8b; Asia_W; 36; A73G; T152C; A263G          | 16569 | Asia_W          | K1a8b      | K           | K            | 36             |
| 4260 | JQ706062.1           | JQ706062.1; U2d1; Asia_S_W_Europe; 36; A73G; T152C; T199C  | 16569 | Asia_S_W_Europe | U2d1       | U           | U2           | 36             |
| 4261 | JQ706063.1           | JQ706063.1; K1a19a; Asia_W; 40; T63C; C64T; A73G           | 16569 | Asia_W          | K1a19a     | K           | K            | 40             |
| 4262 | JQ706064.1           | JQ706064.1; K1a17a; Asia_W; 39; A73G; A200G; C242T         | 16569 | Asia_W          | K1a17a     | K           | K            | 39             |
| 4263 | JQ706065.1           | JQ706065.1; K1a12a1a; Asia_W; 37; A73G; T195C; A263G       | 16568 | Asia_W          | K1a12a1a   | K           | K            | 37             |
| 4264 | JQ706066.1           | JQ706066.1; K1a12a1a; Asia_W; 37; A73G; A263G; C497T       | 16568 | Asia_W          | K1a12a1a   | K           | K            | 37             |



**Supplementary Table S3** Human mitochondrial database (hMITO DB v1.0) metadata

| Row  | Name (accession no.)         | Description                                                                          | Size  | Geo_Region           | Haplogroup  | Macro_Haplo | Macro_Haplo2 | Total Variants |
|------|------------------------------|--------------------------------------------------------------------------------------|-------|----------------------|-------------|-------------|--------------|----------------|
| 4265 | JQ706067.1                   | JQ706067.1; U2d2; Asia_S_W_Europe; 39; A73G; T152C; T199C                            | 16569 | Asia_S_W_Europe      | U2d2        | U           | U2           | 39             |
| 4266 | DQ272116_M10                 | DQ272116_M10; M10; Asia_E_SE; 40; A73G; A263G; C315CC                                | 16573 | Asia_E_SE            | M10         | M           | M10          | 40             |
| 4267 | EF060330_M1a1                | EF060330_M1a1; M1a1; Africa_E_Nile Valley; 42; A73G; T195C; A263G                    | 16569 | Africa_E_Nile Valley | M1a1        | M           | M1           | 42             |
| 4268 | DQ112737_L1b1                | DQ112737_L1b1; L1b1; Africa_C; 64; CA522d; G709A; T710C                              | 15583 | Africa_C             | L1b1        | L1          | L1           | 64             |
| 4269 | KF148510_M8a1                | KF148510_M8a1; M8a1; Asia_C_E; 39; A73G; A234G; A263G                                | 16568 | Asia_C_E             | M8a1        | M           | M8           | 39             |
| 4270 | KC577355_R32                 | KC577355_R32; R32; Asia_S_SE; 29; A73G; T152C; A263G                                 | 16561 | Asia_S_SE            | R32         | R           | R32          | 29             |
| 4271 | KC867130_N3                  | KC867130_N3; N3; Africa_NE_Europe_E; 36; A73G; T146C; T195C                          | 16569 | Africa_NE_Europe_E   | N3          | N           | N3           | 36             |
| 4272 | JX289118_N8                  | JX289118_N8; N8; Africa_NE_Asia_E; 34; A73G; T195C; A263G                            | 16575 | Africa_NE_Asia_E     | N8          | N           | N8           | 34             |
| 4273 | AY289059_O                   | AY289059_O; O; Asia_SE_Oceania; 44; C44CC; A73G; A263G                               | 16575 | Asia_SE_Oceania      | O           | O           | O            | 44             |
| 4274 | KC911472_HV                  | KC911472_HV; HV; Asia_W; 11; A263G; C315CC; A750G                                    | 16569 | Asia_W               | HV          | HV          | HV           | 11             |
| 4275 | KC911379_R2b                 | KC911379_R2b; R2; Asia_S_SE; 32; A73G; T152C; A263G                                  | 16571 | Asia_S_SE            | R2          | R           | R2           | 32             |
| 4276 | DQ408676_M3                  | DQ408676_M3; M3; Asia_S; 37; A73G; T195C; A263G                                      | 16568 | Asia_S               | M3          | M           | M3           | 37             |
| 4277 | JN253391_D1                  | JN253391_D1; D1; Asia_E_America_N_S; 33; A73G; A263G; C315CC                         | 16569 | Asia_E_America_N_S   | D1          | D           | D            | 33             |
| 4278 | AP008373_M8a2b_Jap           | AP008373_M8a2b_Jap; M8a2b; Asia_C_E; 38; A73G; T152C; A263G                          | 16569 | Asia_C_E             | M8a2b       | M           | M8           | 38             |
| 4279 | NC_012920_rCRS               | NC_012920_rCRS; H2a2a1; Asia_W_Europe; 0; REF; REF; REF                              | 16569 | Asia_W_Europe        | H2a2a1      | H           | H            | 0              |
| 4280 | FN673705_hs_Denisova_Altai   | FN673705_hs_Denisova_Altai; H2a2; Asia_W_E; 3; A263G; A8860G; A15326G                | 16570 | Asia_W_E             | Denisova    | Denisova    | Denisova     | 3              |
| 4281 | NC_011137_hs_Neanderthal_ref | NC_011137_hs_Neanderthal_refseq; L1'2'3'4'5'6; Asia_W_Europe ;44; A73G; T146C; T195C | 16565 | Asia_W_Europe        | Neanderthal | Neanderth   | Neanderth    | 44             |
| 4282 | MN849799_P                   | MN849799_P; P; Asia_SE_Oceania; 12; A73G; A263G; A750G                               | 16568 | Asia_SE_Oceania      | P           | P           | P            | 12             |
| 4283 | AY956412_Q                   | AY956412_Q; Q2a3a; Asia_SE_Oceania; 45; A73G; T152C; T195C                           | 16572 | Asia_SE_Oceania      | Q2a3a       | Q           | Q            | 45             |
| 4284 | AF346963_S1                  | AF346963_S1; S1; Asia_SE_Oceania; 16; A73G; A263G; A750G                             | 16569 | Asia_SE_Oceania      | S1          | S           | S1           | 16             |
| 4285 | AY289051_S2                  | AY289051_S2; S2; Asia_SE_Oceania; 17; A73G; A263G; A750G                             | 16568 | Asia_SE_Oceania      | S2          | S           | S2           | 17             |
| 4286 | EU007853_Y                   | EU007853_Y; Y1a+16189; Asia_NE; 24; A73G; T146C; A263G                               | 16570 | Asia_NE              | Y1a+16189   | Y           | Y            | 24             |
