# Supplementary material for: A Customized Human Mitochondrial DNA Database (hMITO DB v1.0) for Rapid Sequence Analysis, Haplotyping and Geo-Mapping to Advance Translational Mitogenomics
Source: Preprints.org preprint supplement (doi:10.20944/preprints202307.1891.v1), 2023-07-27
Supplement: Supplementary file 4 [file supplementary]

**Supplementary Table S1** Variant table for sample 152v

| Reference<br>Position | Type      | Length | Reference | Allele | Zygosity     | Count | Coverage | Frequency   | Average quality |
|-----------------------|-----------|--------|-----------|--------|--------------|-------|----------|-------------|-----------------|
| 73                    | SNV       | 1      | A         | G      | Homozygous   | 5053  | 5089     | 99.29259186 | 63.41104294     |
| 146                   | SNV       | 1      | T         | C      | Heterozygous | 835   | 7266     | 11.49187999 | 32.85508982     |
| 150                   | SNV       | 1      | C         | T      | Heterozygous | 1344  | 7266     | 18.49710983 | 36.4389881      |
| 152                   | SNV       | 1      | T         | C      | Heterozygous | 955   | 7266     | 13.14340765 | 37.03141361     |
| 199                   | SNV       | 1      | T         | C      | Heterozygous | 2155  | 2187     | 98.53680841 | 37.80464037     |
| 203                   | MNV       | 2      | GT        | AC     | Heterozygous | 2159  | 2187     | 98.71970736 | 37.61195881     |
| 250                   | SNV       | 1      | T         | C      | Heterozygous | 2157  | 2188     | 98.58318099 | 63.36439499     |
| 263                   | SNV       | 1      | A         | G      | Homozygous   | 2188  | 2188     | 100         | 62.54981718     |
| 303                   | Insertion | 1      | -         | C      | Heterozygous | 1883  | 2188     | 86.06032907 | 35.72545717     |
| 303                   | Insertion | 2      | -         | CC     | Heterozygous | 136   | 2188     | 6.215722121 | 35.02180358     |
| 311                   | Insertion | 1      | -         | C      | Heterozygous | 2147  | 2187     | 98.17101052 | 37.38751747     |
| 351                   | SNV       | 1      | A         | G      | Heterozygous | 59    | 2243     | 2.630405707 | 36.01694915     |
| 452                   | Insertion | 1      | -         | T      | Homozygous   | 58    | 58       | 100         | 60.96551724     |
| 514                   | Insertion | 2      | -         | CA     | Heterozygous | 2     | 58       | 3.448275862 | 38.25           |
| 16129                 | SNV       | 1      | G         | A      | Heterozygous | 1165  | 1181     | 98.64521592 | 63.66008584     |
| 16172                 | SNV       | 1      | T         | C      | Heterozygous | 1186  | 1269     | 93.45941686 | 37.06661046     |
| 16223                 | SNV       | 1      | C         | T      | Homozygous   | 535   | 539      | 99.25788497 | 38.13831776     |
| 16249                 | SNV       | 1      | T         | C      | Heterozygous | 7     | 542      | 1.291512915 | 38.57142857     |
| 16263                 | SNV       | 1      | T         | A      | Heterozygous | 23    | 565      | 4.07079646  | 63.82608696     |
| 16311                 | SNV       | 1      | T         | C      | Homozygous   | 564   | 565      | 99.82300885 | 40.17553191     |
| 16391                 | SNV       | 1      | G         | A      | Heterozygous | 2200  | 2797     | 78.65570254 | 36.57272727     |
| 16519                 | SNV       | 1      | T         | C      | Homozygous   | 2234  | 2237     | 99.86589182 | 38.18487019     |

SNV, single nucleotide variant; MNV, multi-nucleotide variant
